# Supplementary material for: Gene-interaction perturbation network analysis identifies distinct subtypes and actionable targets for aggressive thyroid cancer: an integrative multi-omics and machine learning approach for precise medicine
Source: Research Square preprint supplement (doi:10.21203/rs.3.rs-7834338/v1), 2025-10-30
Supplement: Supplementary file 1 [file 144a99c48225130505fe0cba.xlsx]

## Sheet: Table S1
Table S1_Datasets.summary
dataset_id	sample category	bulk/scRNA	platform
GTEx_thyroid	279 normal	bulk	Illumina RNA-seq
TCGA-THCA	505 tumor, 59 paratumor	bulk	Illumina RNA-seq
GSE213647	349 PTC	bulk	Illumina NextSeq 500
GSE60542	15 FTC, 61 PTC, 4 PDTC	bulk	Affymetrix Human Genome U133 Plus 2.0 Array
GSE33630	45 para, 49 PTC, 11 ATC	bulk	Affymetrix Human Genome U133 Plus 2.0 Array
GSE27155	4 normal, 23 FTC, 51 PTC, 15 Oncocytic, 4 ATC	bulk	Affymetrix Human Genome U133A Array
GSE76039	17 PDTC, 20 ATC	bulk	Affymetrix Human Genome U133 Plus 2.0 Array
GSE184362	7 PTC	scRNA	Illumina NovaSeq 6000
GSE148673	5 ATC	scRNA	Illumina NovaSeq 6000
GSE182416	7 normal	scRNA	HiSeq X Ten
GSE193581	10 ATC, 7 PTC, 6 normal	scRNA	Illumina NovaSeq 6000
GSE232237	7 PTC and 5 ATC	scRNA	HiSeq X Ten

## Sheet: Table S2
Table S2_Functional interactions_from_Reactome
GI_pair	Gene1	Gene2	Annotation	Direction	Score
1	A1CF	APOBEC1	catalyzed by; complex; input	<-	1
2	A1CF	EP300	expression regulated by	<-	1
3	A1CF	RBM47	predicted	-	0.89
4	A2M	APOA1	inhibit	-|	1
5	A2M	BMP1	inhibit	-|	1
6	A2M	KLKB1	complex; input	-	1
7	A2M	MMP1	complex; input	-	1
8	A2M	MMP13	complex; input	-	1
9	A2M	MMP3	complex; input	-	1
10	A2M	NFKB1	expression regulated by	<-	1
11	A2M	RELA	expression regulated by	<-	1
12	A2M	STAT1	expression regulated by	<-	1
13	A2M	STAT3	expression regulated by	<-	1
14	A4GNT	MUC1	catalyze	->	1
15	A4GNT	MUC12	catalyze	->	1
16	A4GNT	MUC13	catalyze	->	1
17	A4GNT	MUC15	catalyze	->	1
18	A4GNT	MUC16	catalyze	->	1
19	A4GNT	MUC17	catalyze	->	1
20	A4GNT	MUC19	catalyze	->	1
21	A4GNT	MUC2	catalyze	->	1
22	A4GNT	MUC20	catalyze	->	1
23	A4GNT	MUC21	catalyze	->	1
24	A4GNT	MUC3A	catalyze	->	1
25	A4GNT	MUC3B	catalyze	->	1
26	A4GNT	MUC4	catalyze	->	1
27	A4GNT	MUC5AC	catalyze	->	1
28	A4GNT	MUC5B	catalyze	->	1
29	A4GNT	MUC6	catalyze	->	1
30	A4GNT	MUC7	catalyze	->	1
31	A4GNT	MUCL1	catalyze	->	1
32	A4GNT	POMGNT1	predicted	-	0.91
33	AAAS	AGO2	catalyze	->	1
34	AAAS	ALYREF	activate; complex; input	->	1
35	AAAS	AURKB	catalyze	->	1
36	AAAS	BANF1	complex; input	-	1
37	AAAS	BIRC5	catalyze	->	1
38	AAAS	CASC3	activate; complex; input	->	1
39	AAAS	CCNB1	catalyzed by	<-	1
40	AAAS	CCNB2	catalyzed by	<-	1
41	AAAS	CDC40	activate; input	->	1
42	AAAS	CDCA8	catalyze	->	1
43	AAAS	CDK1	catalyzed by	<-	1
44	AAAS	CHTOP	activate; input	->	1
45	AAAS	CPSF1	activate	->	1
46	AAAS	CPSF2	activate	->	1
47	AAAS	CPSF3	activate	->	1
48	AAAS	CPSF4	activate	->	1
49	AAAS	DDX20	activate	->	1
50	AAAS	DHX38	activate; input	->	1
51	AAAS	DYNC1H1	input	-	1
52	AAAS	DYNC1I1	input	-	1
53	AAAS	DYNC1I2	input	-	1
54	AAAS	DYNC1LI1	input	-	1
55	AAAS	DYNC1LI2	input	-	1
56	AAAS	DYNLL1	input	-	1
57	AAAS	DYNLL2	input	-	1
58	AAAS	EIF4A3	activate; complex; input	->	1
59	AAAS	EIF4E	activate	->	1
60	AAAS	FIP1L1	activate	->	1
61	AAAS	GCK	catalyze	->	1
62	AAAS	GCKR	catalyze	->	1
63	AAAS	GEMIN2	activate	->	1
64	AAAS	GEMIN4	activate	->	1
65	AAAS	GEMIN5	activate	->	1
66	AAAS	GEMIN6	activate	->	1
67	AAAS	GEMIN7	activate	->	1
68	AAAS	GEMIN8	activate	->	1
69	AAAS	GLE1	reaction	-	1
70	AAAS	HDAC4	catalyze	->	1
71	AAAS	HIKESHI	catalyze	->	1
72	AAAS	HMGA1	complex; input	-	1
73	AAAS	HNRNPC	catalyze	->	1
74	AAAS	HSPA1B	catalyze	->	1
75	AAAS	INCENP	catalyze	->	1
76	AAAS	IPO8	catalyze	->	1
77	AAAS	IRF3	inhibit	-|	1
78	AAAS	IRF7	inhibit	-|	1
79	AAAS	ISG15	inhibited by	|-	1
80	AAAS	KPNA1	activate; catalyze	->	1
81	AAAS	KPNA2	catalyze; reaction	->	1
82	AAAS	KPNA3	catalyze	->	1
83	AAAS	KPNA4	catalyze	->	1
84	AAAS	KPNA5	catalyze	->	1
85	AAAS	KPNA7	catalyze	->	1
86	AAAS	KPNB1	activate; catalyze; complex; input	->	1
87	AAAS	MAGOH	activate; complex; input	->	1
88	AAAS	MAGOHB	activate; complex; input	->	1
89	AAAS	MDM2	catalyze	->	1
90	AAAS	NCBP1	activate; complex; input	->	1
91	AAAS	NCBP2	activate; complex; input	->	1
92	AAAS	NDC1	complex; input	-	1
93	AAAS	NEK6	catalyzed by	<-	1
94	AAAS	NEK9	catalyzed by	<-	1
95	AAAS	NPM1	complex; input	-	1
96	AAAS	NUP107	complex; input	-	1
97	AAAS	NUP133	complex; input	-	1
98	AAAS	NUP153	complex; input	-	1
99	AAAS	NUP155	complex; input	-	1
100	AAAS	NUP160	complex; input	-	1
101	AAAS	NUP188	complex; input	-	1
102	AAAS	NUP205	complex; input	-	1
103	AAAS	NUP210	complex; input	-	1
104	AAAS	NUP214	complex; input	-	1
105	AAAS	NUP35	complex; input	-	1
106	AAAS	NUP37	complex; input	-	1
107	AAAS	NUP42	complex; input	-	1
108	AAAS	NUP43	complex; input	-	1
109	AAAS	NUP50	complex; input	-	1
110	AAAS	NUP54	complex; input	-	1
111	AAAS	NUP58	complex; input	-	1
112	AAAS	NUP62	complex; input	-	1
113	AAAS	NUP85	complex; input	-	1
114	AAAS	NUP88	complex; input	-	1
115	AAAS	NUP93	complex; input	-	1
116	AAAS	NUP98	complex; input	-	1
117	AAAS	NXF1	activate; complex; input	->	1
118	AAAS	NXF2	activate; complex; input	->	1
119	AAAS	NXT1	activate; complex; input	->	1
120	AAAS	PHAX	activate	->	1
121	AAAS	PIAS3	reaction	-	1
122	AAAS	PML	catalyze	->	1
123	AAAS	POLDIP3	activate; complex; input	->	1
124	AAAS	POM121	complex; input	-	1
125	AAAS	POM121C	complex; input	-	1
126	AAAS	PSIP1	complex; input	-	1
127	AAAS	RAE1	complex; input	-	1
128	AAAS	RAN	activate; catalyze; complex; input	->	1
129	AAAS	RANBP2	catalyze; complex; input	->	1
130	AAAS	RANGAP1	complex	-	1
131	AAAS	RBM8A	activate; complex; input	->	1
132	AAAS	RNPS1	activate; complex; input	->	1
133	AAAS	SARNP	activate; input	->	1
134	AAAS	SEC13	complex; input	-	1
135	AAAS	SEH1L	complex; input	-	1
136	AAAS	SLBP	activate	->	1
137	AAAS	SLU7	activate; input	->	1
138	AAAS	SMN1	activate	->	1
139	AAAS	SNRPB	activate	->	1
140	AAAS	SNRPD1	activate	->	1
141	AAAS	SNRPD2	activate	->	1
142	AAAS	SNRPD3	activate	->	1
143	AAAS	SNRPE	activate	->	1
144	AAAS	SNRPF	activate	->	1
145	AAAS	SNRPG	activate	->	1
146	AAAS	SNUPN	activate	->	1
147	AAAS	SP100	catalyze	->	1
148	AAAS	SRRM1	activate; complex; input	->	1
149	AAAS	SRSF1	activate; input	->	1
150	AAAS	SRSF11	activate; input	->	1
151	AAAS	SRSF2	activate; input	->	1
152	AAAS	SRSF3	activate; input	->	1
153	AAAS	SRSF4	activate; input	->	1
154	AAAS	SRSF5	activate; input	->	1
155	AAAS	SRSF6	activate; input	->	1
156	AAAS	SRSF7	activate; input	->	1
157	AAAS	SRSF9	activate; input	->	1
158	AAAS	SUMO1	catalyze	->	1
159	AAAS	SUMO2	catalyze	->	1
160	AAAS	SUMO3	catalyze	->	1
161	AAAS	SYMPK	activate	->	1
162	AAAS	THOC1	activate; input	->	1
163	AAAS	THOC2	activate; input	->	1
164	AAAS	THOC3	activate; input	->	1
165	AAAS	THOC5	activate; input	->	1
166	AAAS	THOC6	activate; input	->	1
167	AAAS	THOC7	activate; input	->	1
168	AAAS	TOP2A	catalyze	->	1
169	AAAS	TPR	complex; input	-	1
170	AAAS	U2AF1	activate; input	->	1
171	AAAS	U2AF1L4	activate; input	->	1
172	AAAS	U2AF2	activate; input	->	1
173	AAAS	UBE2I	catalyze; complex	->	1
174	AAAS	UPF3B	activate; complex; input	->	1
175	AAAS	WDR33	activate	->	1
176	AAAS	XPO1	activate; complex; input	->	1
177	AAAS	XPOT	catalyze	->	1
178	AAAS	ZC3H11A	activate; input	->	1
179	AADAT	GOT1	predicted	-	0.92
180	AADAT	KYAT3	predicted	-	0.92
181	AAG1	CASP1	activated by	<-	1
182	AAG1	CASP10	activated by	<-	1
183	AAG1	CASP2	reaction	-	1
184	AAG1	CASP3	activated by	<-	1
185	AAG1	CASP5	activated by	<-	1
186	AAG1	CASP6	activated by	<-	1
187	AAG1	CASP7	activated by	<-	1
188	AAG1	CASPASE-9C	activated by	<-	1
189	AAG1	EIF1	reaction	-	1
190	AAG1	EIF2S1	complex; reaction	-	1
191	AAG1	EIF2S2	complex; input	-	1
192	AAG1	EIF2S3B	complex; input	-	1
193	AAG1	EIF3A	complex; input	-	1
194	AAG1	EIF4A1	complex; input	-	1
195	AAG1	EIF4E	complex; input	-	1
196	AAG1	PTBP1	complex; input	-	1
197	AAK1	ACTR2	complex; input	-	1
198	AAK1	ACTR3	complex; input	-	1
199	AAK1	ADRB2	complex; input	-	1
200	AAK1	AGFG1	complex; input	-	1
201	AAK1	AMPH	complex; input	-	1
202	AAK1	AP2A1	complex; input	-	1
203	AAK1	AP2A2	complex; input	-	1
204	AAK1	AP2B1	complex; input	-	1
205	AAK1	AP2M1	complex; input	-	1
206	AAK1	AP2S1	complex; input	-	1
207	AAK1	APOB	complex; input	-	1
208	AAK1	AREG	complex; input	-	1
209	AAK1	ARF6	activated by	<-	1
210	AAK1	ARFGAP1	activated by	<-	1
211	AAK1	ARPC1A	complex; input	-	1
212	AAK1	ARPC2	complex; input	-	1
213	AAK1	ARPC3	complex; input	-	1
214	AAK1	ARPC4	complex; input	-	1
215	AAK1	ARPC5	complex; input	-	1
216	AAK1	ARRB1	complex; input	-	1
217	AAK1	ARRB2	complex; input	-	1
218	AAK1	AVP	complex; input	-	1
219	AAK1	AVPR2	complex; input	-	1
220	AAK1	BIN1	complex; input	-	1
221	AAK1	BTC	complex; input	-	1
222	AAK1	CBL	complex; input	-	1
223	AAK1	CD3D	complex; input	-	1
224	AAK1	CD3G	complex; input	-	1
225	AAK1	CD4	complex; input	-	1
226	AAK1	CFTR	complex; input	-	1
227	AAK1	CHRM2	complex; input	-	1
228	AAK1	CLTA	complex; input	-	1
229	AAK1	CLTB	complex; input	-	1
230	AAK1	CLTC	complex; input	-	1
231	AAK1	CLTCL1	complex; input	-	1
232	AAK1	CTTN	complex; input	-	1
233	AAK1	DAB2	complex; input	-	1
234	AAK1	DNAJC6	complex; input	-	1
235	AAK1	DNM2	complex; input	-	1
236	AAK1	DVL2	complex; input	-	1
237	AAK1	EGF	complex; input	-	1
238	AAK1	EGFR	complex; input	-	1
239	AAK1	EPGN	complex; input	-	1
240	AAK1	EPN1	complex; inhibited by; input	|-	1
241	AAK1	EPN2	complex; inhibited by; input	|-	1
242	AAK1	EPS15	complex; inhibited by; input	|-	1
243	AAK1	EPS15L1	complex; input	-	1
244	AAK1	EREG	complex; input	-	1
245	AAK1	FCHO1	complex; input	-	1
246	AAK1	FCHO2	complex; input	-	1
247	AAK1	FNBP1	complex; input	-	1
248	AAK1	FNBP1L	complex; input	-	1
249	AAK1	FZD4	complex; input	-	1
250	AAK1	GAK	complex; input	-	1
251	AAK1	GAPVD1	complex; input	-	1
252	AAK1	GRB2	complex; input	-	1
253	AAK1	HBEGF	complex; input	-	1
254	AAK1	HGS	complex; input	-	1
255	AAK1	HIP1	complex; input	-	1
256	AAK1	HIP1R	complex; input	-	1
257	AAK1	HSPA8	complex; input	-	1
258	AAK1	IGF2R	complex; input	-	1
259	AAK1	IL7R	complex; input	-	1
260	AAK1	ITSN1	complex; input	-	1
261	AAK1	KIAA0319	complex; input	-	1
262	AAK1	LDLR	complex; input	-	1
263	AAK1	LDLRAP1	complex; input	-	1
264	AAK1	LRP2	complex; input	-	1
265	AAK1	M6PR	complex; input	-	1
266	AAK1	NECAP1	complex; input	-	1
267	AAK1	OCRL	complex; input	-	1
268	AAK1	PACSIN2	complex; input	-	1
269	AAK1	PICALM	complex; input	-	1
270	AAK1	PIK3C2A	complex; input	-	1
271	AAK1	RAB5A	complex; input	-	1
272	AAK1	REPS1	complex; input	-	1
273	AAK1	REPS2	complex; input	-	1
274	AAK1	RPS27A	complex; input	-	1
275	AAK1	SCARB2	complex; input	-	1
276	AAK1	SGIP1	complex; input	-	1
277	AAK1	SH3GL2	complex; input	-	1
278	AAK1	SH3KBP1	complex; input	-	1
279	AAK1	SLC18A3	complex; input	-	1
280	AAK1	SLC2A8	complex; input	-	1
281	AAK1	SNX9	complex; input	-	1
282	AAK1	STAM	complex; input	-	1
283	AAK1	STAM2	complex; input	-	1
284	AAK1	STON2	complex; input	-	1
285	AAK1	SYNJ1	complex; input	-	1
286	AAK1	SYNJ2	complex; input	-	1
287	AAK1	SYT1	complex; input	-	1
288	AAK1	SYT2	complex; input	-	1
289	AAK1	SYT9	complex; input	-	1
290	AAK1	TF	complex; input	-	1
291	AAK1	TFRC	complex; input	-	1
292	AAK1	TGFA	complex; input	-	1
293	AAK1	TGOLN2	complex; input	-	1
294	AAK1	TRIP10	complex; input	-	1
295	AAK1	UBA52	complex; input	-	1
296	AAK1	UBB	complex; input	-	1
297	AAK1	UBC	complex; input	-	1
298	AAK1	UBQLN2	inhibited by	|-	1
299	AAK1	VAMP2	complex; input	-	1
300	AAK1	VAMP3	complex; input	-	1
301	AAK1	VAMP4	complex; input	-	1
302	AAK1	VAMP7	complex; input	-	1
303	AAK1	VAMP8	complex; input	-	1
304	AAK1	WASL	complex; input	-	1
305	AAK1	WNK2	predicted	-	0.89
306	AAK1	WNT5A	complex; input	-	1
307	AAMP	AREG	activate	->	1
308	AAMP	BTC	activate	->	1
309	AAMP	EGF	activate	->	1
310	AAMP	EGFR	complex; input; reaction	-	1
311	AAMP	EPGN	activate	->	1
312	AAMP	EREG	activate	->	1
313	AAMP	HBEGF	activate	->	1
314	AAMP	NOD2	complex; input	-	1
315	AAMP	TBXA2R	complex; input	-	1
316	AAMP	TGFA	activate	->	1
317	AAR2	CD2BP2	predicted	-	0.94
318	AAR2	PRPF8	predicted	-	0.95
319	AAR2	TSSC4	predicted	-	0.93
320	AARS1	CEBPB	expression regulated by	<-	1
321	AARS1	HSP90AA1	predicted	-	0.92
322	AARS1	IARS1	predicted	-	0.93
323	AARS1	LARS1	predicted	-	0.92
324	AARS1	SOD1	predicted	-	0.89
325	AARS2	IARS2	predicted	-	0.91
326	AARS2	TARS2	predicted	-	0.94
327	AASDHPPT	FASN	catalyze	->	1
328	AATF	ABT1	predicted	-	0.94
329	AATF	BMS1	predicted	-	0.94
330	AATF	CLN5	predicted	-	0.91
331	AATF	DCAF13	predicted	-	0.91
332	AATF	DHX37	predicted	-	0.9
333	AATF	DNTTIP2	predicted	-	0.92
334	AATF	E2F1	complex; input	-	1
335	AATF	E2F2	complex; input	-	1
336	AATF	E2F3	complex; input	-	1
337	AATF	E2F6	expression regulated by	<-	1
338	AATF	ELF1	expression regulated by	<-	1
339	AATF	EMG1	predicted	-	0.95
340	AATF	ESF1	predicted	-	0.93
341	AATF	FBL	predicted	-	0.91
342	AATF	FCF1	predicted	-	0.89
343	AATF	HDAC1	input	-	1
344	AATF	HEATR1	predicted	-	0.95
345	AATF	IMP3	predicted	-	0.94
346	AATF	IMP4	predicted	-	0.95
347	AATF	KRR1	predicted	-	0.92
348	AATF	MAGED1	complex; input	-	1
349	AATF	MAX	expression regulated by	<-	1
350	AATF	MPHOSPH10	predicted	-	0.91
351	AATF	MRPS12	predicted	-	0.89
352	AATF	NAT10	predicted	-	0.91
353	AATF	NGDN	predicted	-	0.99
354	AATF	NGF	complex; input	-	1
355	AATF	NGFR	complex; input	-	1
356	AATF	NOL10	predicted	-	0.96
357	AATF	NOL6	predicted	-	0.94
358	AATF	NOP14	predicted	-	0.97
359	AATF	NOP56	predicted	-	0.92
360	AATF	NOP58	predicted	-	0.95
361	AATF	PNO1	predicted	-	0.92
362	AATF	PWP2	predicted	-	0.95
363	AATF	RB1	complex; input	-	1
364	AATF	RCL1	predicted	-	0.94
365	AATF	RIOK1	predicted	-	0.94
366	AATF	RPS11	predicted	-	0.89
367	AATF	RPS13	predicted	-	0.89
368	AATF	RPS14	predicted	-	0.89
369	AATF	RPS15A	predicted	-	0.89
370	AATF	RPS16	predicted	-	0.89
371	AATF	RPS17	predicted	-	0.89
372	AATF	RPS19	predicted	-	0.89
373	AATF	RPS23	predicted	-	0.89
374	AATF	RPS24	predicted	-	0.89
375	AATF	RPS27	predicted	-	0.89
376	AATF	RPS28	predicted	-	0.89
377	AATF	RPS3	predicted	-	0.89
378	AATF	RPS3A	predicted	-	0.89
379	AATF	RPS4X	predicted	-	0.89
380	AATF	RPS5	predicted	-	0.89
381	AATF	RPS6	predicted	-	0.89
382	AATF	RPS7	predicted	-	0.89
383	AATF	RPS8	predicted	-	0.89
384	AATF	RPS9	predicted	-	0.89
385	AATF	RPSA	predicted	-	0.89
386	AATF	RRP7A	predicted	-	0.89
387	AATF	RRP9	predicted	-	0.94
388	AATF	SNU13	predicted	-	0.89
389	AATF	TBL3	predicted	-	0.94
390	AATF	TFDP1	complex; input	-	1
391	AATF	USF1	expression regulated by	<-	1
392	AATF	UTP11	predicted	-	0.95
393	AATF	UTP15	predicted	-	0.91
394	AATF	UTP18	predicted	-	0.97
395	AATF	UTP20	predicted	-	0.92
396	AATF	UTP3	predicted	-	0.92
397	AATF	UTP4	predicted	-	0.94
398	AATF	UTP6	predicted	-	0.94
399	AATF	WDR3	predicted	-	0.95
400	AATF	WDR36	predicted	-	0.89
401	AATF	WDR43	predicted	-	0.95
402	AATF	WDR46	predicted	-	0.93
403	AATF	WDR75	predicted	-	0.91
404	ABAT	GOT2	predicted	-	0.93
405	ABCA1	ABCA12	predicted	-	0.91
406	ABCA1	APOA1	complex; input	-	1
407	ABCA1	JUN	expression regulated by	<-	1
408	ABCA1	NR1H2	complex; input	-	1
409	ABCA1	PRKACA	catalyzed by	<-	1
410	ABCA1	PRKACB	catalyzed by	<-	1
411	ABCA1	PRKACG	catalyzed by	<-	1
412	ABCA1	RXRA	complex; input	-	1
413	ABCA1	SP3	expression regulated by	<-	1
414	ABCA1	USF1	expression regulated by	<-	1
415	ABCA1	USF2	expression regulated by	<-	1
416	ABCA1	ZDHHC8	catalyzed by	<-	1
417	ABCA10	ABCA13	predicted	-	0.92
418	ABCA10	ABCA6	predicted	-	0.97
419	ABCA10	ABCA8	predicted	-	0.93
420	ABCA10	ABCA9	predicted	-	0.97
421	ABCA10	ABCC12	predicted	-	0.92
422	ABCA10	ABCG4	predicted	-	0.89
423	ABCA13	ABCA6	predicted	-	0.93
424	ABCA13	ABCA8	predicted	-	0.95
425	ABCA13	ABCA9	predicted	-	0.95
426	ABCA2	ABCA6	predicted	-	0.89
427	ABCA2	ABCB9	predicted	-	0.9
428	ABCA2	ABCD4	predicted	-	0.89
429	ABCA2	EGR1	expression regulated by	<-	1
430	ABCA2	SP3	expression regulated by	<-	1
431	ABCA2	SP4	expression regulated by	<-	1
432	ABCA5	ABCA6	predicted	-	0.91
433	ABCA6	ABCA8	predicted	-	0.98
434	ABCA6	ABCA9	predicted	-	0.94
435	ABCA6	ABCC10	predicted	-	0.92
436	ABCA6	ABCC12	predicted	-	0.92
437	ABCA7	APOA1	complex	-	1
438	ABCA8	ABCA9	predicted	-	0.91
439	ABCA9	ABCC12	predicted	-	0.92
440	ABCA9	ABCG4	predicted	-	0.89
441	ABCB1	ABCB4	predicted	-	0.91
442	ABCB1	ABCC1	predicted	-	0.9
443	ABCB1	ABCC4	predicted	-	0.89
444	ABCB1	CEBPA	expression regulated by	<-	1
445	ABCB1	CEBPB	expression regulated by	<-	1
446	ABCB1	EGR1	expression regulated by	<-	1
447	ABCB1	EGR2	expression regulated by	<-	1
448	ABCB1	ETS1	expression regulated by	<-	1
449	ABCB1	HIF1A	expression regulated by	<-	1
450	ABCB1	JUN	expression regulated by	<-	1
451	ABCB1	NFKB1	expression regulated by	<-	1
452	ABCB1	RARA	expression regulated by	<-	1
453	ABCB1	SP1	expression regulated by	<-	1
454	ABCB1	TP53	expression regulated by	<-	1
455	ABCB1	WT1	expression regulated by	<-	1
456	ABCB10	ABCB7	predicted	-	0.9
457	ABCB10	GATA1	expression regulated by	<-	1
458	ABCB10	GATA2	expression regulated by	<-	1
459	ABCB10	TAL1	expression regulated by	<-	1
460	ABCB11	ABCB4	predicted	-	0.9
461	ABCB7	ABCB8	predicted	-	0.9
462	ABCB7	CIAPIN1	activate	->	1
463	ABCB7	NDOR1	activate	->	1
464	ABCB7	NUBP1	activate	->	1
465	ABCB7	NUBP2	activate	->	1
466	ABCB8	ABCC10	predicted	-	0.89
467	ABCB8	CCDC51	predicted	-	0.91
468	ABCC1	ABCC2	predicted	-	0.92
469	ABCC1	ABCC3	predicted	-	0.92
470	ABCC1	ABCC4	predicted	-	0.92
471	ABCC1	ABCG2	predicted	-	0.9
472	ABCC1	VDAC1	predicted	-	0.89
473	ABCC1	VDAC2	predicted	-	0.89
474	ABCC1	VDAC3	predicted	-	0.89
475	ABCC10	SV2C	predicted	-	0.91
476	ABCC11	ABCC12	predicted	-	0.94
477	ABCC12	ABCC6	predicted	-	0.92
478	ABCC2	ABCC3	predicted	-	0.92
479	ABCC2	NDUFA9	predicted	-	0.89
480	ABCC3	ABCG2	predicted	-	0.89
481	ABCC3	VDAC1	predicted	-	0.89
482	ABCC3	VDAC2	predicted	-	0.89
483	ABCC3	VDAC3	predicted	-	0.89
484	ABCC8	ABCC9	predicted	-	0.9
485	ABCC8	KCNJ11	complex	-	1
486	ABCC8	KCNJ8	complex	-	1
487	ABCC8	PRKACA	activated by	<-	1
488	ABCC8	PRKACB	activated by	<-	1
489	ABCC8	PRKACG	activated by	<-	1
490	ABCC8	RAPGEF3	activated by	<-	1
491	ABCC8	RAPGEF4	activated by	<-	1
492	ABCC9	KCNJ11	complex	-	1
493	ABCC9	KCNJ8	complex	-	1
494	ABCD1	ABCD2	complex	-	1
495	ABCD1	ABCD3	complex	-	1
496	ABCD1	ABCD4	predicted	-	0.9
497	ABCD1	PEX19	complex; input	-	1
498	ABCD1	PEX3	complex; input	-	1
499	ABCD1	SLC27A2	predicted	-	0.95
500	ABCD2	ABCD3	complex	-	1
501	ABCD2	ABCD4	predicted	-	0.92
502	ABCD2	PEX19	complex; input	-	1
503	ABCD2	PEX3	complex; input	-	1
504	ABCD2	TFAP2A	expression regulated by	<-	1
505	ABCD3	ABCD4	predicted	-	0.9
506	ABCD3	EHHADH	predicted	-	0.9
507	ABCD3	PEX19	complex; input	-	1
508	ABCD3	PEX3	complex; input	-	1
509	ABCD4	LMBRD1	complex	-	1
510	ABCE1	AGO2	predicted	-	0.92
511	ABCE1	EIF1	predicted	-	0.89
512	ABCE1	EIF1AX	predicted	-	0.97
513	ABCE1	EIF2S1	predicted	-	0.94
514	ABCE1	EIF3A	predicted	-	0.97
515	ABCE1	EIF3B	predicted	-	0.97
516	ABCE1	EIF3C	predicted	-	0.97
517	ABCE1	EIF3CL	predicted	-	0.92
518	ABCE1	EIF3G	predicted	-	0.97
519	ABCE1	EIF3I	predicted	-	0.94
520	ABCE1	EIF3J	predicted	-	0.97
521	ABCE1	EIF3K	predicted	-	0.91
522	ABCE1	EIF3L	predicted	-	0.89
523	ABCE1	EIF3M	predicted	-	0.93
524	ABCE1	EIF4A1	predicted	-	0.96
525	ABCE1	EIF4G1	predicted	-	0.91
526	ABCE1	ETF1	predicted	-	0.98
527	ABCE1	FLNA	inhibit	-|	1
528	ABCE1	GSPT1	predicted	-	0.95
529	ABCE1	PA2G4	predicted	-	0.93
530	ABCE1	PDE12	reaction	-	1
531	ABCE1	RACK1	predicted	-	0.93
532	ABCE1	RBM8A	predicted	-	0.92
533	ABCE1	RNASEL	complex; inhibit; input	-|	1
534	ABCE1	RPL10	predicted	-	0.89
535	ABCE1	RPL13A	predicted	-	0.92
536	ABCE1	RPL38	predicted	-	0.89
537	ABCE1	RPL4	predicted	-	0.91
538	ABCE1	RPL7A	predicted	-	0.92
539	ABCE1	RPS14	predicted	-	0.94
540	ABCE1	RPS17	predicted	-	0.97
541	ABCE1	RPS25	predicted	-	0.93
542	ABCE1	RPS3	predicted	-	0.93
543	ABCE1	RPS3A	predicted	-	0.97
544	ABCE1	RPS5	predicted	-	0.89
545	ABCE1	RPS9	predicted	-	0.95
546	ABCE1	SRM	predicted	-	0.9
547	ABCF1	DHX9	predicted	-	0.93
548	ABCF1	EFTUD2	predicted	-	0.9
549	ABCF1	EIF2S1	complex; input	-	1
550	ABCF1	EIF2S2	complex; input	-	1
551	ABCF1	EIF2S3	complex; input	-	1
552	ABCF1	HNRNPA0	predicted	-	0.89
553	ABCF1	IFI16	predicted	-	0.94
554	ABCF1	IGF2BP3	predicted	-	0.89
555	ABCF1	RPL27A	predicted	-	0.89
556	ABCF2	DCAF13	predicted	-	0.91
557	ABCF2	DKC1	predicted	-	0.9
558	ABCF2	NOP56	predicted	-	0.9
559	ABCG5	ABCG8	complex	-	1
560	ABCG5	NPC1L1	predicted	-	0.9
561	ABCG8	NPC1L1	predicted	-	0.9
562	ABHD14B	CTCF	expression regulated by	<-	1
563	ABHD17A	ABHD17B	reaction	-	1
564	ABHD17A	ABHD17C	reaction	-	1
565	ABHD17A	HRAS	catalyze; inhibit	-	1
566	ABHD17A	KRAS	catalyze; inhibit	-	1
567	ABHD17A	LYPLA1	reaction	-	1
568	ABHD17A	NRAS	catalyze; inhibit	-	1
569	ABHD17B	ABHD17C	reaction	-	1
570	ABHD17B	HRAS	catalyze; inhibit	-	1
571	ABHD17B	KRAS	catalyze; inhibit	-	1
572	ABHD17B	LYPLA1	reaction	-	1
573	ABHD17B	NRAS	catalyze; inhibit	-	1
574	ABHD17C	HRAS	catalyze; inhibit	-	1
575	ABHD17C	KRAS	catalyze; inhibit	-	1
576	ABHD17C	LYPLA1	reaction	-	1
577	ABHD17C	NRAS	catalyze; inhibit	-	1
578	ABHD5	PLIN1	complex	-	1
579	ABHD5	PNPLA2	predicted	-	0.97
580	ABI1	ABI2	predicted	-	0.94
581	ABI1	ABL1	activated by; catalyzed by	<-	1
582	ABI1	ABL2	predicted	-	0.89
583	ABI1	ACTB	complex; input	-	1
584	ABI1	ACTG1	complex; input	-	1
585	ABI1	ACTR2	activate; complex; input	->	1
586	ABI1	ACTR3	activate; complex; input	->	1
587	ABI1	ARPC1A	complex; input	-	1
588	ABI1	ARPC1B	activate; complex; input	->	1
589	ABI1	ARPC2	activate; complex; input	->	1
590	ABI1	ARPC3	activate; complex; input	->	1
591	ABI1	ARPC4	activate; complex; input	->	1
592	ABI1	ARPC5	activate; complex; input	->	1
593	ABI1	BAIAP2	activated by; complex; input	<-	1
594	ABI1	BRK1	complex	-	1
595	ABI1	CYFIP1	complex	-	1
596	ABI1	CYFIP2	complex; input	-	1
597	ABI1	DIAPH1	activate	->	1
598	ABI1	DIAPH3	inhibit	-|	1
599	ABI1	EGF	activated by	<-	1
600	ABI1	EGFR	activated by	<-	1
601	ABI1	ENAH	predicted	-	0.93
602	ABI1	EPS8	complex; input	-	1
603	ABI1	ITGA4	complex; input	-	1
604	ABI1	ITGB1	complex; input	-	1
605	ABI1	MAPK1	catalyzed by	<-	1
606	ABI1	MAPK3	catalyzed by	<-	1
607	ABI1	NCKAP1	complex; input	-	1
608	ABI1	NCKAP1L	complex	-	1
609	ABI1	RAC1	activate; activated by; complex; input	<->	1
610	ABI1	RAC3	complex; input	-	1
611	ABI1	SOS1	complex; input	-	1
612	ABI1	USP6NL	input	-	1
613	ABI1	VCAM1	complex; input	-	1
614	ABI1	WASF1	complex	-	1
615	ABI1	WASF2	activate; complex	->	1
616	ABI1	WASF3	predicted	-	0.91
617	ABI1	WASL	complex; input	-	1
618	ABI2	ABL1	predicted	-	0.93
619	ABI2	ABL2	predicted	-	0.91
620	ABI2	ACTR2	activate	->	1
621	ABI2	ACTR3	activate	->	1
622	ABI2	ARPC1B	activate	->	1
623	ABI2	ARPC2	activate	->	1
624	ABI2	ARPC3	activate	->	1
625	ABI2	ARPC4	activate	->	1
626	ABI2	ARPC5	activate	->	1
627	ABI2	BRK1	complex	-	1
628	ABI2	CYFIP1	predicted	-	0.97
629	ABI2	CYFIP2	complex	-	1
630	ABI2	NCKAP1	complex	-	1
631	ABI2	NCKAP1L	predicted	-	0.93
632	ABI2	RAC1	activated by	<-	1
633	ABI2	SHANK3	predicted	-	0.91
634	ABI2	WASF1	complex	-	1
635	ABI2	WASF2	predicted	-	0.96
636	ABL1	ABL2	predicted	-	0.92
637	ABL1	ATF3	expression regulated by	<-	1
638	ABL1	ATM	activated by; catalyzed by	<-	1
639	ABL1	BAIAP2	catalyze; reaction	->	1
640	ABL1	BCL3	expression regulated by	<-	1
641	ABL1	BCR	predicted	-	0.92
642	ABL1	BLK	activated by	<-	1
643	ABL1	BNIP2	complex; input	-	1
644	ABL1	BOC	complex; input	-	1
645	ABL1	BRK1	activate; catalyze	->	1
646	ABL1	CABLES1	complex; input	-	1
647	ABL1	CAP1	complex; input	-	1
648	ABL1	CAP2	complex; input	-	1
649	ABL1	CBFB	inhibit	-|	1
650	ABL1	CBL	predicted	-	0.93
651	ABL1	CCNA2	activated by	<-	1
652	ABL1	CD2AP	predicted	-	0.9
653	ABL1	CDC42	complex; input	-	1
654	ABL1	CDH15	complex; input	-	1
655	ABL1	CDH2	activate; complex; input	->	1
656	ABL1	CDK2	activated by	<-	1
657	ABL1	CDK5	activate; complex; input	->	1
658	ABL1	CDON	complex; input	-	1
659	ABL1	CLASP1	complex; input	-	1
660	ABL1	CLASP2	complex; input	-	1
661	ABL1	CRK	predicted	-	0.93
662	ABL1	CRKL	predicted	-	0.92
663	ABL1	CTNNA1	activate; complex; input	->	1
664	ABL1	CTNNA2	complex; input	-	1
665	ABL1	CTNNB1	activate; complex; input	->	1
666	ABL1	CTNND1	activate	->	1
667	ABL1	CYFIP1	catalyze	->	1
668	ABL1	CYFIP2	activate; catalyze	->	1
669	ABL1	DVL2	predicted	-	0.91
670	ABL1	EGFR	predicted	-	0.92
671	ABL1	EP300	expression regulated by	<-	1
672	ABL1	EPS8	activate	->	1
673	ABL1	ERBB2	predicted	-	0.91
674	ABL1	ERBB3	predicted	-	0.92
675	ABL1	ERBB4	predicted	-	0.91
676	ABL1	FGR	activated by	<-	1
677	ABL1	FLT3	predicted	-	0.92
678	ABL1	FOSL1	expression regulated by	<-	1
679	ABL1	FYN	activated by	<-	1
680	ABL1	GATA2	expression regulated by	<-	1
681	ABL1	GTF2F1	expression regulated by	<-	1
682	ABL1	HCK	activated by	<-	1
683	ABL1	HDAC2	expression regulated by	<-	1
684	ABL1	IRF1	expression regulated by	<-	1
685	ABL1	JAK1	predicted	-	0.92
686	ABL1	JUN	expression regulated by	<-	1
687	ABL1	KIT	predicted	-	0.91
688	ABL1	LCK	activated by	<-	1
689	ABL1	LRP8	activated by	<-	1
690	ABL1	LYN	activated by	<-	1
691	ABL1	MAP2K6	catalyzed by	<-	1
692	ABL1	MAPK11	complex; input	-	1
693	ABL1	MAPK12	complex; input	-	1
694	ABL1	MAPK14	complex; input	-	1
695	ABL1	MDM2	activate	->	1
696	ABL1	MYC	reaction	-	1
697	ABL1	NCK1	predicted	-	0.91
698	ABL1	NCKAP1	activate; catalyze	->	1
699	ABL1	NCKAP1L	catalyze	->	1
700	ABL1	NELFE	expression regulated by	<-	1
701	ABL1	NFKBIA	predicted	-	0.93
702	ABL1	NR2C2	expression regulated by	<-	1
703	ABL1	NTRK1	complex; input	-	1
704	ABL1	PDGFB	activate	->	1
705	ABL1	PDGFRB	activate	->	1
706	ABL1	PIK3R1	predicted	-	0.9
707	ABL1	PLCG1	activate; activated by	<->	1
708	ABL1	PRKCD	predicted	-	0.91
709	ABL1	PSTPIP1	predicted	-	0.91
710	ABL1	PTPN1	predicted	-	0.91
711	ABL1	PTPN6	predicted	-	0.9
712	ABL1	PXN	predicted	-	0.96
713	ABL1	RAC1	activate; catalyze; reaction	->	1
714	ABL1	RAD52	catalyze	->	1
715	ABL1	RB1	complex	-	1
716	ABL1	RELN	activated by	<-	1
717	ABL1	ROBO1	complex; input	-	1
718	ABL1	RUNX1	inhibit	-|	1
719	ABL1	RUNX2	activate	->	1
720	ABL1	SIRT6	expression regulated by	<-	1
721	ABL1	SLIT1	complex	-	1
722	ABL1	SLIT2	complex; input	-	1
723	ABL1	SMARCA4	expression regulated by	<-	1
724	ABL1	SMARCB1	expression regulated by	<-	1
725	ABL1	SMC3	expression regulated by	<-	1
726	ABL1	SNCA	predicted	-	0.9
727	ABL1	SOS1	activate	->	1
728	ABL1	SPAG9	complex; input	-	1
729	ABL1	SRC	activated by	<-	1
730	ABL1	STAT1	expression regulated by	<-	1
731	ABL1	STAT5A	predicted	-	0.96
732	ABL1	STAT5B	predicted	-	0.93
733	ABL1	STK4	predicted	-	0.9
734	ABL1	TERT	complex; input	-	1
735	ABL1	TP63	activate	->	1
736	ABL1	TP73	activate	->	1
737	ABL1	TWIST1	activate; inhibited by	|->	1
738	ABL1	USF2	expression regulated by	<-	1
739	ABL1	VAV1	predicted	-	0.9
740	ABL1	WASF2	activate; catalyze	->	1
741	ABL1	WWTR1	activate	->	1
742	ABL1	YAP1	catalyze; inhibit	-	1
743	ABL1	YES1	activated by	<-	1
744	ABL1	ZAP70	predicted	-	0.91
745	ABL1	ZFP36L1	expression regulated by	<-	1
746	ABL1	ZFP36L2	expression regulated by	<-	1
747	ABL1	ZNF263	expression regulated by	<-	1
748	ABL1	ZNF274	expression regulated by	<-	1
749	ABL2	AXL	predicted	-	0.91
750	ABL2	CAP1	complex; input	-	1
751	ABL2	CAP2	complex; input	-	1
752	ABL2	CLASP1	complex; input	-	1
753	ABL2	CLASP2	complex; input	-	1
754	ABL2	EPHB2	predicted	-	0.91
755	ABL2	ERBB3	predicted	-	0.9
756	ABL2	ERBB4	predicted	-	0.9
757	ABL2	FLT3	complex; input	-	1
758	ABL2	FLT3LG	complex; input	-	1
759	ABL2	KIT	predicted	-	0.9
760	ABL2	PDGFRB	predicted	-	0.9
761	ABL2	ROBO1	complex; input	-	1
762	ABL2	SLIT2	complex; input	-	1
763	ABL2	STAT3	expression regulated by	<-	1
764	ABLIM1	ABLIM3	predicted	-	0.89
765	ABLIM1	DCC	complex; input	-	1
766	ABLIM1	DOCK1	complex; input	-	1
767	ABLIM1	FYN	complex; input	-	1
768	ABLIM1	NCK1	complex; input	-	1
769	ABLIM1	NTN1	complex; input	-	1
770	ABLIM1	PTK2	complex; input	-	1
771	ABLIM1	RAC1	complex; input	-	1
772	ABLIM1	SRC	complex; input	-	1
773	ABLIM1	TRIO	complex; input	-	1
774	ABLIM2	ABLIM3	predicted	-	0.92
775	ABLIM2	DCC	complex; input	-	1
776	ABLIM2	DOCK1	complex; input	-	1
777	ABLIM2	FYN	complex; input	-	1
778	ABLIM2	NCK1	complex; input	-	1
779	ABLIM2	NTN1	complex; input	-	1
780	ABLIM2	PTK2	complex; input	-	1
781	ABLIM2	RAC1	complex; input	-	1
782	ABLIM2	SRC	complex; input	-	1
783	ABLIM2	TRIO	complex; input	-	1
784	ABLIM3	DCC	complex; input	-	1
785	ABLIM3	DOCK1	complex; input	-	1
786	ABLIM3	FOS	expression regulated by	<-	1
787	ABLIM3	FYN	complex; input	-	1
788	ABLIM3	NCK1	complex; input	-	1
789	ABLIM3	NTN1	complex; input	-	1
790	ABLIM3	PAX5	expression regulated by	<-	1
791	ABLIM3	PTK2	complex; input	-	1
792	ABLIM3	RAC1	complex; input	-	1
793	ABLIM3	SRC	complex; input	-	1
794	ABLIM3	TRIO	complex; input	-	1
795	ABR	BCR	predicted	-	0.91
796	ABR	RAC1	activate; catalyze	->	1
797	ABR	RAC2	catalyze	->	1
798	ABR	RHOA	activate; catalyze	->	1
799	ABR	RHOB	catalyze	->	1
800	ABR	RHOC	catalyze	->	1
801	ABRAXAS1	ATM	complex; input	-	1
802	ABRAXAS1	BABAM1	complex; input	-	1
803	ABRAXAS1	BABAM2	complex; input	-	1
804	ABRAXAS1	BARD1	complex; input	-	1
805	ABRAXAS1	BRCA1	complex; input	-	1
806	ABRAXAS1	BRCC3	complex; input	-	1
807	ABRAXAS1	CHEK2	catalyzed by; complex; input	<-	1
808	ABRAXAS1	H2AX	complex; input	-	1
809	ABRAXAS1	H3-4	complex; input	-	1
810	ABRAXAS1	H4C1	complex; input	-	1
811	ABRAXAS1	HERC2	complex; input	-	1
812	ABRAXAS1	KAT5	complex; input	-	1
813	ABRAXAS1	MDC1	complex; input	-	1
814	ABRAXAS1	MRE11	complex; input	-	1
815	ABRAXAS1	NBN	complex; input	-	1
816	ABRAXAS1	NSD2	complex; input	-	1
817	ABRAXAS1	PAXIP1	input	-	1
818	ABRAXAS1	PIAS4	complex; input	-	1
819	ABRAXAS1	RAD50	complex; input	-	1
820	ABRAXAS1	RIF1	input	-	1
821	ABRAXAS1	RNF168	complex; input	-	1
822	ABRAXAS1	RNF4	catalyzed by	<-	1
823	ABRAXAS1	RNF8	complex; input	-	1
824	ABRAXAS1	RPS27A	input	-	1
825	ABRAXAS1	SUMO2	catalyze; input	->	1
826	ABRAXAS1	TP53BP1	complex; input	-	1
827	ABRAXAS1	UBA52	input	-	1
828	ABRAXAS1	UBB	input	-	1
829	ABRAXAS1	UBC	input	-	1
830	ABRAXAS1	UBE2I	catalyze; input	->	1
831	ABRAXAS1	UBE2N	complex; input	-	1
832	ABRAXAS1	UBE2V2	complex; input	-	1
833	ABRAXAS1	UIMC1	complex; input	-	1
834	ABRAXAS2	BABAM1	complex	-	1
835	ABRAXAS2	BABAM2	complex	-	1
836	ABRAXAS2	BRCC3	complex	-	1
837	ABRAXAS2	NLRP3	complex	-	1
838	ABT1	ATF3	expression regulated by	<-	1
839	ABT1	BLM	predicted	-	0.89
840	ABT1	CDK12	predicted	-	0.89
841	ABT1	CEBPB	expression regulated by	<-	1
842	ABT1	EP300	expression regulated by	<-	1
843	ABT1	ESF1	predicted	-	0.93
844	ABT1	GTF2B	expression regulated by	<-	1
845	ABT1	MPHOSPH10	predicted	-	0.92
846	ABT1	PRDM10	predicted	-	0.91
847	ABT1	PRDM15	predicted	-	0.91
848	ABT1	PURB	predicted	-	0.91
849	ABT1	SPI1	expression regulated by	<-	1
850	ABT1	TADA2B	predicted	-	0.93
851	ABT1	TAF5	predicted	-	0.89
852	ABT1	ZBTB11	predicted	-	0.91
853	ABT1	ZBTB24	predicted	-	0.91
854	ABT1	ZBTB47	predicted	-	0.91
855	ABT1	ZKSCAN8	predicted	-	0.91
856	ABT1	ZNF100	predicted	-	0.91
857	ABT1	ZNF107	predicted	-	0.91
858	ABT1	ZNF169	predicted	-	0.89
859	ABT1	ZNF239	predicted	-	0.9
860	ABT1	ZNF275	predicted	-	0.91
861	ABT1	ZNF316	predicted	-	0.91
862	ABT1	ZNF430	predicted	-	0.91
863	ABT1	ZNF483	predicted	-	0.91
864	ABT1	ZNF574	predicted	-	0.93
865	ABT1	ZNF629	predicted	-	0.91
866	ABT1	ZNF668	predicted	-	0.94
867	ABT1	ZNF768	predicted	-	0.91
868	ABT1	ZNF770	predicted	-	0.91
869	ABT1	ZNF771	predicted	-	0.94
870	ABT1	ZNF865	predicted	-	0.91
871	ACAA1	ACAA2	predicted	-	0.91
872	ACAA1	ACOX1	predicted	-	0.99
873	ACAA1	ECH1	predicted	-	0.89
874	ACAA1	ECHS1	predicted	-	0.91
875	ACAA1	EHHADH	predicted	-	0.91
876	ACAA1	PEX10	complex; input	-	1
877	ACAA1	PEX12	complex; input	-	1
878	ACAA1	PEX13	complex; input	-	1
879	ACAA1	PEX14	complex; input	-	1
880	ACAA1	PEX2	complex; input	-	1
881	ACAA1	PEX5	complex; input	-	1
882	ACAA1	PEX7	complex; input	-	1
883	ACAA1	PPARG	expression regulated by	<-	1
884	ACAA1	TYSND1	catalyzed by	<-	1
885	ACAA2	ACADM	predicted	-	0.96
886	ACAA2	ACAT1	predicted	-	0.91
887	ACAA2	ECHS1	predicted	-	0.97
888	ACAA2	NPEPPS	predicted	-	0.89
889	ACACA	ACACB	predicted	-	0.98
890	ACACA	BRCA1	predicted	-	0.89
891	ACACA	CEBPA	expression regulated by	<-	1
892	ACACA	FASN	predicted	-	0.94
893	ACACA	HLCS	catalyzed by	<-	1
894	ACACA	PRKAA1	predicted	-	0.93
895	ACACA	PRKAA2	predicted	-	0.93
896	ACACA	PRKAG1	predicted	-	0.89
897	ACACA	SP3	expression regulated by	<-	1
898	ACACA	USF1	expression regulated by	<-	1
899	ACACA	USF2	expression regulated by	<-	1
900	ACACB	HDAC1	predicted	-	0.89
901	ACACB	HLCS	catalyzed by	<-	1
902	ACACB	PRKAA1	predicted	-	0.93
903	ACACB	SP1	expression regulated by	<-	1
904	ACAD11	ACADM	predicted	-	0.91
905	ACAD8	ACADSB	predicted	-	0.9
906	ACAD8	CLPP	complex; input	-	1
907	ACAD8	CLPX	complex; input	-	1
908	ACAD8	LONP1	complex; input	-	1
909	ACAD9	ACADM	predicted	-	0.93
910	ACAD9	ACOT2	predicted	-	0.92
911	ACAD9	COA1	complex; input	-	1
912	ACAD9	ECSIT	complex	-	1
913	ACAD9	MT-ND1	complex; input	-	1
914	ACAD9	MT-ND2	complex; input	-	1
915	ACAD9	MT-ND3	complex; input	-	1
916	ACAD9	MT-ND4	complex; input	-	1
917	ACAD9	MT-ND5	complex; input	-	1
918	ACAD9	MT-ND6	complex; input	-	1
919	ACAD9	NDUFA1	complex; input	-	1
920	ACAD9	NDUFA10	complex; input	-	1
921	ACAD9	NDUFA11	complex; input	-	1
922	ACAD9	NDUFA12	complex; input	-	1
923	ACAD9	NDUFA13	complex; input	-	1
924	ACAD9	NDUFA2	complex; input	-	1
925	ACAD9	NDUFA3	complex; input	-	1
926	ACAD9	NDUFA5	complex; input	-	1
927	ACAD9	NDUFA6	complex; input	-	1
928	ACAD9	NDUFA7	complex; input	-	1
929	ACAD9	NDUFA8	complex; input	-	1
930	ACAD9	NDUFA9	complex; input	-	1
931	ACAD9	NDUFAB1	complex; input	-	1
932	ACAD9	NDUFAF1	complex	-	1
933	ACAD9	NDUFAF2	complex; input	-	1
934	ACAD9	NDUFAF3	complex; input	-	1
935	ACAD9	NDUFAF4	complex; input	-	1
936	ACAD9	NDUFAF5	complex; input	-	1
937	ACAD9	NDUFAF6	complex; input	-	1
938	ACAD9	NDUFAF7	complex; input	-	1
939	ACAD9	NDUFB1	complex; input	-	1
940	ACAD9	NDUFB10	complex; input	-	1
941	ACAD9	NDUFB11	complex; input	-	1
942	ACAD9	NDUFB2	complex; input	-	1
943	ACAD9	NDUFB3	complex; input	-	1
944	ACAD9	NDUFB4	complex; input	-	1
945	ACAD9	NDUFB5	complex; input	-	1
946	ACAD9	NDUFB6	complex; input	-	1
947	ACAD9	NDUFB7	complex; input	-	1
948	ACAD9	NDUFB8	complex; input	-	1
949	ACAD9	NDUFB9	complex; input	-	1
950	ACAD9	NDUFC1	complex; input	-	1
951	ACAD9	NDUFC2	complex; input	-	1
952	ACAD9	NDUFS1	complex; input	-	1
953	ACAD9	NDUFS2	complex; input	-	1
954	ACAD9	NDUFS3	complex; input	-	1
955	ACAD9	NDUFS4	complex; input	-	1
956	ACAD9	NDUFS5	complex; input	-	1
957	ACAD9	NDUFS6	complex; input	-	1
958	ACAD9	NDUFS7	complex; input	-	1
959	ACAD9	NDUFS8	complex; input	-	1
960	ACAD9	NDUFV1	complex; input	-	1
961	ACAD9	NDUFV2	complex; input	-	1
962	ACAD9	NDUFV3	complex; input	-	1
963	ACAD9	TIMMDC1	complex; input	-	1
964	ACAD9	TMEM126B	complex	-	1
965	ACAD9	TMEM186	complex; input	-	1
966	ACADL	ACADM	predicted	-	0.9
967	ACADL	ACADVL	predicted	-	0.9
968	ACADL	HADHA	reaction	-	1
969	ACADL	HADHB	reaction	-	1
970	ACADM	ECH1	predicted	-	0.92
971	ACADM	ECHS1	predicted	-	0.99
972	ACADM	ETFA	predicted	-	0.95
973	ACADM	ETFB	predicted	-	0.95
974	ACADM	IDH3A	predicted	-	0.91
975	ACADS	ECI1	predicted	-	0.9
976	ACADSB	LONP1	complex; input	-	1
977	ACAN	ADAMTS4	catalyzed by	<-	1
978	ACAN	ADAMTS5	catalyzed by	<-	1
979	ACAN	B3GNT2	catalyzed by	<-	1
980	ACAN	B3GNT3	catalyzed by	<-	1
981	ACAN	B3GNT4	catalyzed by	<-	1
982	ACAN	B3GNT7	catalyzed by	<-	1
983	ACAN	B4GALT1	catalyzed by	<-	1
984	ACAN	B4GALT2	catalyzed by	<-	1
985	ACAN	B4GALT3	catalyzed by	<-	1
986	ACAN	B4GALT4	catalyzed by	<-	1
987	ACAN	B4GALT5	catalyzed by	<-	1
988	ACAN	B4GALT6	catalyzed by	<-	1
989	ACAN	B4GAT1	catalyzed by	<-	1
990	ACAN	CHST1	catalyzed by	<-	1
991	ACAN	CHST2	catalyzed by	<-	1
992	ACAN	CHST5	catalyzed by	<-	1
993	ACAN	CHST6	catalyzed by	<-	1
994	ACAN	COMP	complex; input	-	1
995	ACAN	HAPLN1	complex; input	-	1
996	ACAN	HTRA1	catalyzed by	<-	1
997	ACAN	MMP1	catalyzed by	<-	1
998	ACAN	MMP12	catalyzed by	<-	1
999	ACAN	MMP13	catalyzed by	<-	1
1000	ACAN	MMP2	catalyzed by	<-	1
1001	ACAN	MMP3	catalyzed by	<-	1
1002	ACAN	MMP7	catalyzed by	<-	1
1003	ACAN	MMP9	catalyzed by	<-	1
1004	ACAN	SP1	expression regulated by	<-	1
1005	ACAN	ST3GAL1	catalyzed by	<-	1
1006	ACAN	ST3GAL2	catalyzed by	<-	1
1007	ACAN	ST3GAL3	catalyzed by	<-	1
1008	ACAN	ST3GAL4	catalyzed by	<-	1
1009	ACAN	ST3GAL6	catalyzed by	<-	1
1010	ACAN	TFAP2A	expression regulated by	<-	1
1011	ACAN	TNC	complex; input	-	1
1012	ACAN	TNR	complex; input	-	1
1013	ACAP1	ARF6	activate; activated by; complex	<->	1
1014	ACAP1	ARFGAP2	predicted	-	0.92
1015	ACAP1	CLTC	complex; input	-	1
1016	ACAP1	GULP1	activate; complex	->	1
1017	ACAP1	PLD1	activated by	<-	1
1018	ACAP1	PLD2	activated by	<-	1
1019	ACAP1	SLC2A4	complex; input	-	1
1020	ACAP2	ARF6	activate	->	1
1021	ACAP2	RAB8A	predicted	-	0.94
1022	ACAT1	ACAT2	predicted	-	0.94
1023	ACAT1	CLPP	complex; input	-	1
1024	ACAT1	CLPX	complex; input	-	1
1025	ACAT1	ECHS1	predicted	-	0.92
1026	ACAT1	IDH2	catalyze	->	1
1027	ACAT1	LONP1	complex; input	-	1
1028	ACBD3	GOLGB1	complex; input	-	1
1029	ACBD4	ACBD5	predicted	-	0.89
1030	ACBD5	PEX19	complex; input	-	1
1031	ACBD5	PEX3	complex; input	-	1
1032	ACD	ANKRD28	activated by; catalyzed by	<-	1
1033	ACD	ATRX	activated by; complex; input	<-	1
1034	ACD	BLM	catalyzed by	<-	1
1035	ACD	CDK2	catalyzed by; inhibited by	-	1
1036	ACD	CTC1	activated by; catalyze; catalyzed by; complex; input	<->	1
1037	ACD	DAXX	activated by; complex; input	<-	1
1038	ACD	DKC1	complex; input	-	1
1039	ACD	DNA2	complex; input	-	1
1040	ACD	FEN1	catalyzed by	<-	1
1041	ACD	GAR1	complex; input	-	1
1042	ACD	H3-3A	complex; input	-	1
1043	ACD	H3-4	complex; input	-	1
1044	ACD	H4C1	complex; input	-	1
1045	ACD	LIG1	catalyzed by	<-	1
1046	ACD	LMNA	complex; input	-	1
1047	ACD	LMNB1	complex; input	-	1
1048	ACD	NEIL3	complex; input	-	1
1049	ACD	NHP2	complex; input	-	1
1050	ACD	NOP10	complex; input	-	1
1051	ACD	PCNA	catalyze; complex; input	->	1
1052	ACD	PIF1	catalyzed by	<-	1
1053	ACD	POLA1	complex; input	-	1
1054	ACD	POLA2	complex; input	-	1
1055	ACD	POLD1	complex; input	-	1
1056	ACD	POLD2	complex; input	-	1
1057	ACD	POLD3	complex; input	-	1
1058	ACD	POLD4	complex; input	-	1
1059	ACD	POLR2A	inhibit	-|	1
1060	ACD	POLR2B	inhibit	-|	1
1061	ACD	POLR2C	inhibit	-|	1
1062	ACD	POLR2D	inhibit	-|	1
1063	ACD	POLR2E	inhibit	-|	1
1064	ACD	POLR2F	inhibit	-|	1
1065	ACD	POLR2G	inhibit	-|	1
1066	ACD	POLR2H	inhibit	-|	1
1067	ACD	POLR2I	inhibit	-|	1
1068	ACD	POLR2J	inhibit	-|	1
1069	ACD	POLR2K	inhibit	-|	1
1070	ACD	POLR2L	inhibit	-|	1
1071	ACD	POT1	complex; input	-	1
1072	ACD	PPP6C	activated by; catalyzed by	<-	1
1073	ACD	PPP6R3	activated by; catalyzed by	<-	1
1074	ACD	PRIM1	complex; input	-	1
1075	ACD	PRIM2	complex; input	-	1
1076	ACD	RAD21	complex; input	-	1
1077	ACD	REC8	complex; input	-	1
1078	ACD	RFC1	complex; input	-	1
1079	ACD	RFC2	complex; input	-	1
1080	ACD	RFC3	complex; input	-	1
1081	ACD	RFC4	complex; input	-	1
1082	ACD	RFC5	complex; input	-	1
1083	ACD	RPA1	complex; input	-	1
1084	ACD	RPA2	complex; input	-	1
1085	ACD	RPA3	complex; input	-	1
1086	ACD	RTEL1	complex; input	-	1
1087	ACD	SMC1A	complex; input	-	1
1088	ACD	SMC1B	complex; input	-	1
1089	ACD	SMC3	complex; input	-	1
1090	ACD	STAG1	complex; input	-	1
1091	ACD	STAG2	complex; input	-	1
1092	ACD	STAG3	complex; input	-	1
1093	ACD	STN1	activated by; catalyze; catalyzed by; complex; input	<->	1
1094	ACD	SUN1	complex; input	-	1
1095	ACD	SUN2	complex; input	-	1
1096	ACD	SYCP2	complex; input	-	1
1097	ACD	SYCP3	complex; input	-	1
1098	ACD	SYNE1	complex; input	-	1
1099	ACD	SYNE2	complex; input	-	1
1100	ACD	TEN1	activated by; catalyze; catalyzed by; complex; input	<->	1
1101	ACD	TERF1	complex; input	-	1
1102	ACD	TERF2	complex; input	-	1
1103	ACD	TERF2IP	complex; input	-	1
1104	ACD	TERT	complex; input	-	1
1105	ACD	TINF2	complex; input	-	1
1106	ACD	WRAP53	complex; input	-	1
1107	ACD	WRN	activated by; catalyzed by	<-	1
1108	ACE	AGT	catalyze; inhibit	-	1
1109	ACE	CEBPB	expression regulated by	<-	1
1110	ACE	EP300	expression regulated by	<-	1
1111	ACE	FOXA1	expression regulated by	<-	1
1112	ACE	HDAC2	expression regulated by	<-	1
1113	ACE	RAD21	expression regulated by	<-	1
1114	ACE2	AGRN	complex; input	-	1
1115	ACE2	AGT	catalyze	->	1
1116	ACE2	AGTR1	predicted	-	0.92
1117	ACE2	CTSL	catalyzed by; inhibited by	-	1
1118	ACE2	FURIN	catalyzed by	<-	1
1119	ACE2	GPC1	complex; input	-	1
1120	ACE2	GPC2	complex; input	-	1
1121	ACE2	GPC3	complex; input	-	1
1122	ACE2	GPC4	complex; input	-	1
1123	ACE2	GPC5	complex; input	-	1
1124	ACE2	GPC6	complex; input	-	1
1125	ACE2	HAVCR1	activated by	<-	1
1126	ACE2	HSPG2	complex; input	-	1
1127	ACE2	NRP1	activated by	<-	1
1128	ACE2	SDC1	complex; input	-	1
1129	ACE2	SDC2	complex; input	-	1
1130	ACE2	SDC3	complex; input	-	1
1131	ACE2	SDC4	complex; input	-	1
1132	ACE2	TMPRSS2	catalyzed by; inhibited by	-	1
1133	ACHE	ATF1	expression regulated by	<-	1
1134	ACHE	CREB1	expression regulated by	<-	1
1135	ACHE	EGR1	expression regulated by	<-	1
1136	ACHE	TFAP2A	expression regulated by	<-	1
1137	ACIN1	ALYREF	catalyzed by; complex; input	<-	1
1138	ACIN1	AQR	catalyze; complex; input	->	1
1139	ACIN1	BCAS2	catalyze; complex; input	->	1
1140	ACIN1	BUD13	complex; input	-	1
1141	ACIN1	BUD31	catalyze; complex; input	->	1
1142	ACIN1	C9ORF78	catalyzed by; complex; input	<-	1
1143	ACIN1	CACTIN	catalyze; complex; input	->	1
1144	ACIN1	CASC3	catalyze; complex; input	->	1
1145	ACIN1	CASP3	catalyzed by	<-	1
1146	ACIN1	CCDC12	catalyze; complex; input	->	1
1147	ACIN1	CDC40	catalyzed by; complex; input	<-	1
1148	ACIN1	CDC5L	catalyze; complex; input	->	1
1149	ACIN1	CHERP	catalyzed by; complex; input	<-	1
1150	ACIN1	CPSF6	predicted	-	0.93
1151	ACIN1	CRNKL1	catalyze; complex; input	->	1
1152	ACIN1	CTNNBL1	catalyze; complex; input	->	1
1153	ACIN1	CWC15	catalyze; complex; input	->	1
1154	ACIN1	CWC22	catalyze; complex; input	->	1
1155	ACIN1	CWC25	catalyze; complex; input	->	1
1156	ACIN1	CWC27	catalyze; complex; input	->	1
1157	ACIN1	CWF19L2	catalyze; input	->	1
1158	ACIN1	DDX23	catalyzed by; complex; input	<-	1
1159	ACIN1	DDX39B	catalyzed by; complex; input	<-	1
1160	ACIN1	DDX41	catalyze; complex; input	->	1
1161	ACIN1	DDX42	catalyzed by; complex; input	<-	1
1162	ACIN1	DDX46	catalyzed by; complex; input	<-	1
1163	ACIN1	DDX5	catalyzed by; complex; input	<-	1
1164	ACIN1	DHX15	catalyze; catalyzed by; complex; input	<->	1
1165	ACIN1	DHX16	catalyze; complex; input	->	1
1166	ACIN1	DHX35	catalyze; complex; input	->	1
1167	ACIN1	DHX38	catalyze; complex; input	->	1
1168	ACIN1	DHX8	catalyze; complex; input	->	1
1169	ACIN1	DHX9	catalyzed by; complex; input	<-	1
1170	ACIN1	EFTUD2	catalyzed by; complex; input	<-	1
1171	ACIN1	EIF4A3	catalyze; complex; input	->	1
1172	ACIN1	FAM32A	catalyze; complex; input	->	1
1173	ACIN1	FAM50A	catalyze; complex; input	->	1
1174	ACIN1	FUS	catalyzed by; complex; input	<-	1
1175	ACIN1	GCFC2	catalyze; input	->	1
1176	ACIN1	GPATCH1	catalyze; complex; input	->	1
1177	ACIN1	GPKOW	catalyze; complex; input	->	1
1178	ACIN1	GTF2F1	catalyzed by; complex; input	<-	1
1179	ACIN1	GTF2F2	catalyzed by; complex; input	<-	1
1180	ACIN1	HNRNPA1	catalyzed by; complex; input	<-	1
1181	ACIN1	HNRNPA2B1	catalyzed by; complex; input	<-	1
1182	ACIN1	HNRNPA3	catalyzed by; complex; input	<-	1
1183	ACIN1	HNRNPC	catalyzed by; complex; input	<-	1
1184	ACIN1	HNRNPD	catalyzed by; complex; input	<-	1
1185	ACIN1	HNRNPF	catalyzed by; complex; input	<-	1
1186	ACIN1	HNRNPH1	catalyzed by; complex; input	<-	1
1187	ACIN1	HNRNPH2	catalyzed by; complex; input	<-	1
1188	ACIN1	HNRNPK	catalyzed by; complex; input	<-	1
1189	ACIN1	HNRNPL	catalyzed by; complex; input	<-	1
1190	ACIN1	HNRNPM	catalyzed by; complex; input	<-	1
1191	ACIN1	HNRNPR	catalyzed by; complex; input	<-	1
1192	ACIN1	HNRNPU	catalyzed by; complex; input	<-	1
1193	ACIN1	HSPA8	catalyze; complex; input	->	1
1194	ACIN1	IK	catalyzed by; complex; input	<-	1
1195	ACIN1	ISY1	catalyze; complex; input	->	1
1196	ACIN1	LENG1	catalyze; complex; input	->	1
1197	ACIN1	LSM2	catalyzed by; input	<-	1
1198	ACIN1	LSM3	catalyzed by; input	<-	1
1199	ACIN1	LSM4	catalyzed by; input	<-	1
1200	ACIN1	LSM5	catalyzed by; input	<-	1
1201	ACIN1	LSM6	catalyzed by; input	<-	1
1202	ACIN1	LSM7	catalyzed by; input	<-	1
1203	ACIN1	LSM8	catalyzed by; input	<-	1
1204	ACIN1	MAGOH	catalyze; complex; input	->	1
1205	ACIN1	MAGOHB	catalyze; complex; input	->	1
1206	ACIN1	MFAP1	complex; input	-	1
1207	ACIN1	MTREX	catalyzed by; complex; input	<-	1
1208	ACIN1	NCBP1	catalyzed by; complex; input	<-	1
1209	ACIN1	NCBP2	catalyzed by; complex; input	<-	1
1210	ACIN1	NKAP	catalyze; complex; input	->	1
1211	ACIN1	NSRP1	catalyze; complex; input	->	1
1212	ACIN1	PCBP1	catalyzed by; complex; input	<-	1
1213	ACIN1	PCBP2	catalyzed by; complex; input	<-	1
1214	ACIN1	PHF5A	catalyzed by; complex; input	<-	1
1215	ACIN1	PLRG1	catalyze; complex; input	->	1
1216	ACIN1	POLR2A	catalyzed by; complex; input	<-	1
1217	ACIN1	POLR2B	catalyzed by; complex; input	<-	1
1218	ACIN1	POLR2C	catalyzed by; complex; input	<-	1
1219	ACIN1	POLR2D	catalyzed by; complex; input	<-	1
1220	ACIN1	POLR2E	catalyzed by; complex; input	<-	1
1221	ACIN1	POLR2F	catalyzed by; complex; input	<-	1
1222	ACIN1	POLR2G	catalyzed by; complex; input	<-	1
1223	ACIN1	POLR2H	catalyzed by; complex; input	<-	1
1224	ACIN1	POLR2I	catalyzed by; complex; input	<-	1
1225	ACIN1	POLR2J	catalyzed by; complex; input	<-	1
1226	ACIN1	POLR2K	catalyzed by; complex; input	<-	1
1227	ACIN1	POLR2L	catalyzed by; complex; input	<-	1
1228	ACIN1	PPIE	catalyze; complex; input	->	1
1229	ACIN1	PPIG	catalyze; complex; input	->	1
1230	ACIN1	PPIH	catalyzed by; input	<-	1
1231	ACIN1	PPIL1	catalyze; complex; input	->	1
1232	ACIN1	PPIL2	catalyze; complex; input	->	1
1233	ACIN1	PPIL3	catalyze; complex; input	->	1
1234	ACIN1	PPIL4	catalyze; complex; input	->	1
1235	ACIN1	PPWD1	catalyze; complex; input	->	1
1236	ACIN1	PQBP1	catalyze; catalyzed by; complex; input	<->	1
1237	ACIN1	PRCC	catalyze; complex; input	->	1
1238	ACIN1	PRKRIP1	catalyze; complex; input	->	1
1239	ACIN1	PRPF18	catalyze; complex; input	->	1
1240	ACIN1	PRPF19	catalyze; complex; input	->	1
1241	ACIN1	PRPF3	catalyzed by; input	<-	1
1242	ACIN1	PRPF31	catalyzed by; input	<-	1
1243	ACIN1	PRPF38A	complex; input	-	1
1244	ACIN1	PRPF4	catalyzed by; input	<-	1
1245	ACIN1	PRPF40A	catalyzed by; input	<-	1
1246	ACIN1	PRPF4B	catalyzed by; input	<-	1
1247	ACIN1	PRPF6	catalyzed by; complex; input	<-	1
1248	ACIN1	PRPF8	catalyzed by; complex; input	<-	1
1249	ACIN1	PTBP1	catalyzed by; complex; input	<-	1
1250	ACIN1	PUF60	catalyzed by; complex; input	<-	1
1251	ACIN1	RBM10	catalyzed by; complex; input	<-	1
1252	ACIN1	RBM17	catalyzed by; complex; input	<-	1
1253	ACIN1	RBM22	catalyze; complex; input	->	1
1254	ACIN1	RBM25	catalyzed by; input	<-	1
1255	ACIN1	RBM39	catalyzed by; input	<-	1
1256	ACIN1	RBM42	catalyzed by; input	<-	1
1257	ACIN1	RBM5	catalyzed by; input	<-	1
1258	ACIN1	RBM8A	catalyze; complex; input	->	1
1259	ACIN1	RBMX	catalyzed by; complex; input	<-	1
1260	ACIN1	RBMX2	complex; input	-	1
1261	ACIN1	RNF113A	catalyze; complex; input	->	1
1262	ACIN1	RNPS1	complex	-	1
1263	ACIN1	SAP18	complex	-	1
1264	ACIN1	SART1	catalyzed by; input	<-	1
1265	ACIN1	SDE2	catalyze; complex; input	->	1
1266	ACIN1	SF3A1	catalyzed by; complex; input	<-	1
1267	ACIN1	SF3A2	catalyzed by; complex; input	<-	1
1268	ACIN1	SF3A3	catalyzed by; complex; input	<-	1
1269	ACIN1	SF3B1	catalyzed by; complex; input	<-	1
1270	ACIN1	SF3B2	catalyzed by; complex; input	<-	1
1271	ACIN1	SF3B3	catalyzed by; complex; input	<-	1
1272	ACIN1	SF3B4	catalyzed by; complex; input	<-	1
1273	ACIN1	SF3B5	catalyzed by; complex; input	<-	1
1274	ACIN1	SF3B6	catalyzed by; complex; input	<-	1
1275	ACIN1	SLU7	catalyze; complex; input	->	1
1276	ACIN1	SMNDC1	catalyzed by; complex; input	<-	1
1277	ACIN1	SMU1	catalyzed by; complex; input	<-	1
1278	ACIN1	SNIP1	complex; input	-	1
1279	ACIN1	SNRNP200	catalyzed by; complex; input	<-	1
1280	ACIN1	SNRNP27	catalyzed by; input	<-	1
1281	ACIN1	SNRNP40	catalyzed by; complex; input	<-	1
1282	ACIN1	SNRNP70	catalyzed by; input	<-	1
1283	ACIN1	SNRPA	catalyzed by; input	<-	1
1284	ACIN1	SNRPA1	catalyzed by; complex; input	<-	1
1285	ACIN1	SNRPB	catalyzed by; complex; input	<-	1
1286	ACIN1	SNRPB2	catalyzed by; complex; input	<-	1
1287	ACIN1	SNRPC	catalyzed by; input	<-	1
1288	ACIN1	SNRPD1	catalyzed by; complex; input	<-	1
1289	ACIN1	SNRPD2	catalyzed by; complex; input	<-	1
1290	ACIN1	SNRPD3	catalyzed by; complex; input	<-	1
1291	ACIN1	SNRPE	catalyzed by; complex; input	<-	1
1292	ACIN1	SNRPF	catalyzed by; complex; input	<-	1
1293	ACIN1	SNRPG	catalyzed by; complex; input	<-	1
1294	ACIN1	SNRPN	catalyzed by; complex; input	<-	1
1295	ACIN1	SNU13	catalyzed by; input	<-	1
1296	ACIN1	SNW1	catalyze; complex; input	->	1
1297	ACIN1	SRPK2	predicted	-	0.95
1298	ACIN1	SRRM1	catalyzed by; complex; input	<-	1
1299	ACIN1	SRRM2	catalyzed by; complex; input	<-	1
1300	ACIN1	SRRT	catalyzed by; complex; input	<-	1
1301	ACIN1	SRSF1	catalyzed by; complex; input	<-	1
1302	ACIN1	SRSF10	catalyzed by; complex; input	<-	1
1303	ACIN1	SRSF11	catalyzed by; complex; input	<-	1
1304	ACIN1	SRSF12	catalyzed by; complex; input	<-	1
1305	ACIN1	SRSF2	catalyzed by; complex; input	<-	1
1306	ACIN1	SRSF3	catalyzed by; complex; input	<-	1
1307	ACIN1	SRSF4	catalyzed by; complex; input	<-	1
1308	ACIN1	SRSF5	catalyzed by; complex; input	<-	1
1309	ACIN1	SRSF6	catalyzed by; complex; input	<-	1
1310	ACIN1	SRSF7	catalyzed by; complex; input	<-	1
1311	ACIN1	SRSF8	catalyzed by; complex; input	<-	1
1312	ACIN1	SRSF9	catalyzed by; complex; input	<-	1
1313	ACIN1	STEEP1	catalyze; complex; input	->	1
1314	ACIN1	SYF2	catalyze; complex; input	->	1
1315	ACIN1	TCERG1	catalyzed by; complex; input	<-	1
1316	ACIN1	TFIP11	catalyze; input	->	1
1317	ACIN1	THRAP3	predicted	-	0.93
1318	ACIN1	TRA2B	catalyzed by; complex; input	<-	1
1319	ACIN1	TXNL4A	catalyzed by; complex; input	<-	1
1320	ACIN1	U2AF1	catalyzed by; complex; input	<-	1
1321	ACIN1	U2AF1L4	catalyzed by; complex; input	<-	1
1322	ACIN1	U2AF2	catalyzed by; complex; input	<-	1
1323	ACIN1	U2SURP	catalyzed by; complex; input	<-	1
1324	ACIN1	UBL5	complex; input	-	1
1325	ACIN1	UPF3B	catalyze; complex; input	->	1
1326	ACIN1	USP39	catalyzed by; input	<-	1
1327	ACIN1	WBP11	catalyze; catalyzed by; complex; input	<->	1
1328	ACIN1	WBP4	complex; input	-	1
1329	ACIN1	WDR70	catalyze; complex; input	->	1
1330	ACIN1	XAB2	catalyze; complex; input	->	1
1331	ACIN1	YBX1	catalyzed by; complex; input	<-	1
1332	ACIN1	YJU2	catalyze; complex; input	->	1
1333	ACIN1	ZMAT2	complex; input	-	1
1334	ACIN1	ZNF830	catalyze; complex; input	->	1
1335	ACKR1	CXCL8	complex; input	-	1
1336	ACKR2	CCL11	complex; input	-	1
1337	ACKR2	CCL17	complex; input	-	1
1338	ACKR2	CCL2	complex; input	-	1
1339	ACKR2	CCL22	complex; input	-	1
1340	ACKR2	CCL3	complex; input	-	1
1341	ACKR2	CCL3L1	complex; input	-	1
1342	ACKR2	CCL4	complex; input	-	1
1343	ACKR2	CCL5	complex; input	-	1
1344	ACKR2	CCL7	complex; input	-	1
1345	ACKR2	NFKB1	expression regulated by	<-	1
1346	ACKR3	CXCL12	complex; input	-	1
1347	ACKR3	CXCR4	predicted	-	0.92
1348	ACKR3	GNAI1	complex; input	-	1
1349	ACKR3	GNAI2	complex; input	-	1
1350	ACKR3	GNAI3	complex; input	-	1
1351	ACKR3	GNAT3	complex; input	-	1
1352	ACKR3	GNB1	complex; input	-	1
1353	ACKR3	GNG2	complex; input	-	1
1354	ACKR3	GPSM1	inhibited by	|-	1
1355	ACKR3	GPSM3	inhibited by	|-	1
1356	ACKR4	CCL19	complex; input	-	1
1357	ACKR4	CCL21	complex; input	-	1
1358	ACKR4	CCL25	complex; input	-	1
1359	ACKR4	CXCR3	predicted	-	0.89
1360	ACLY	CS	predicted	-	0.9
1361	ACLY	FASN	predicted	-	0.95
1362	ACLY	MORC2	activated by	<-	1
1363	ACLY	SREBF1	expression regulated by	<-	1
1364	ACO1	GLRX3	inhibited by	|-	1
1365	ACO2	CLPP	complex; input	-	1
1366	ACO2	CLPX	complex; input	-	1
1367	ACO2	CS	predicted	-	0.99
1368	ACO2	FH	predicted	-	0.94
1369	ACO2	FXN	catalyzed by; input	<-	1
1370	ACO2	IDH2	predicted	-	0.97
1371	ACO2	IDH3A	predicted	-	0.99
1372	ACO2	IDH3G	predicted	-	0.99
1373	ACO2	LONP1	complex; input	-	1
1374	ACO2	MDH2	predicted	-	0.92
1375	ACO2	PDHA1	predicted	-	0.93
1376	ACO2	SDHB	predicted	-	0.92
1377	ACO2	SOD2	predicted	-	0.89
1378	ACO2	SUCLG1	predicted	-	0.89
1379	ACOT1	ACOT2	predicted	-	0.92
1380	ACOT1	PCTP	activated by	<-	1
1381	ACOT11	PCTP	activated by	<-	1
1382	ACOT12	PCTP	activated by	<-	1
1383	ACOT13	HNF4A	expression regulated by	<-	1
1384	ACOT13	PCTP	activated by	<-	1
1385	ACOT2	CLPP	complex; input	-	1
1386	ACOT2	CLPX	complex; input	-	1
1387	ACOT2	LONP1	complex; input	-	1
1388	ACOT2	PEX10	complex; input	-	1
1389	ACOT2	PEX12	complex; input	-	1
1390	ACOT2	PEX13	complex; input	-	1
1391	ACOT2	PEX14	complex; input	-	1
1392	ACOT2	PEX2	complex; input	-	1
1393	ACOT2	PEX5	complex; input	-	1
1394	ACOT4	PEX10	complex; input	-	1
1395	ACOT4	PEX12	complex; input	-	1
1396	ACOT4	PEX13	complex; input	-	1
1397	ACOT4	PEX14	complex; input	-	1
1398	ACOT4	PEX2	complex; input	-	1
1399	ACOT4	PEX5	complex; input	-	1
1400	ACOT7	PCTP	activated by	<-	1
1401	ACOT7L	PCTP	activated by	<-	1
1402	ACOT8	PEX10	complex; input	-	1
1403	ACOT8	PEX12	complex; input	-	1
1404	ACOT8	PEX13	complex; input	-	1
1405	ACOT8	PEX14	complex; input	-	1
1406	ACOT8	PEX2	complex; input	-	1
1407	ACOT8	PEX5	complex; input	-	1
1408	ACOX1	ACOX3	predicted	-	0.89
1409	ACOX1	CAT	predicted	-	0.92
1410	ACOX1	CRAT	predicted	-	0.98
1411	ACOX1	HNF4A	expression regulated by	<-	1
1412	ACOX1	PEX10	complex; input	-	1
1413	ACOX1	PEX12	complex; input	-	1
1414	ACOX1	PEX13	complex; input	-	1
1415	ACOX1	PEX14	complex; input	-	1
1416	ACOX1	PEX2	complex; input	-	1
1417	ACOX1	PEX5	complex; input	-	1
1418	ACOX1	PPARG	expression regulated by	<-	1
1419	ACOX1	TYSND1	catalyzed by	<-	1
1420	ACOX1	USF1	expression regulated by	<-	1
1421	ACOX2	ACOX3	predicted	-	0.92
1422	ACOX2	PEX10	complex; input	-	1
1423	ACOX2	PEX12	complex; input	-	1
1424	ACOX2	PEX13	complex; input	-	1
1425	ACOX2	PEX14	complex; input	-	1
1426	ACOX2	PEX2	complex; input	-	1
1427	ACOX2	PEX5	complex; input	-	1
1428	ACOX2	PPARA	expression regulated by	<-	1
1429	ACOX2	SLC27A2	predicted	-	0.91
1430	ACOX3	PEX10	complex; input	-	1
1431	ACOX3	PEX12	complex; input	-	1
1432	ACOX3	PEX13	complex; input	-	1
1433	ACOX3	PEX14	complex; input	-	1
1434	ACOX3	PEX2	complex; input	-	1
1435	ACOX3	PEX5	complex; input	-	1
1436	ACP1	ARHGAP35	activate	->	1
1437	ACP1	EFNA1	complex; input	-	1
1438	ACP1	EPHA2	complex; input	-	1
1439	ACP5	NFKB1	expression regulated by	<-	1
1440	ACP5	SPI1	expression regulated by	<-	1
1441	ACR	ZP2	predicted	-	0.94
1442	ACSL1	PPARA	expression regulated by	<-	1
1443	ACSL3	ACSL4	predicted	-	0.95
1444	ACSL4	ACSL5	predicted	-	0.92
1445	ACSM1	ACSM3	predicted	-	0.89
1446	ACSM2A	ACSM2B	predicted	-	0.91
1447	ACSM2A	ACSM3	predicted	-	0.89
1448	ACSM2A	ACSM4	predicted	-	0.9
1449	ACSM3	HNF4A	expression regulated by	<-	1
1450	ACSM3	HOXA9	expression regulated by	<-	1
1451	ACSS1	ACSS2	predicted	-	0.91
1452	ACSS1	SIRT3	activated by	<-	1
1453	ACSS2	CTCF	expression regulated by	<-	1
1454	ACSS2	EP300	expression regulated by	<-	1
1455	ACSS2	SIRT1	activated by	<-	1
1456	ACSS2	SIRT3	catalyzed by	<-	1
1457	ACSS2	SP1	expression regulated by	<-	1
1458	ACSS2	SREBF1	expression regulated by	<-	1
1459	ACTA1	ACTA2	predicted	-	0.9
1460	ACTA1	ACTBL2	predicted	-	0.93
1461	ACTA1	ACTC1	predicted	-	0.97
1462	ACTA1	ACTG1	predicted	-	0.97
1463	ACTA1	ACTG2	predicted	-	0.9
1464	ACTA1	ACTN1	complex; input	-	1
1465	ACTA1	ACTN3	complex	-	1
1466	ACTA1	ACTR2	predicted	-	0.93
1467	ACTA1	ACTR3	predicted	-	0.89
1468	ACTA1	ADAM17	catalyzed by	<-	1
1469	ACTA1	AKT1	predicted	-	0.93
1470	ACTA1	AP2A1	complex; input	-	1
1471	ACTA1	AP2A2	complex; input	-	1
1472	ACTA1	ARPC1A	complex	-	1
1473	ACTA1	ARPC1B	complex	-	1
1474	ACTA1	ARPC2	predicted	-	0.89
1475	ACTA1	ARPC3	predicted	-	0.9
1476	ACTA1	ARPC4	catalyzed by	<-	1
1477	ACTA1	ARPC5	catalyzed by; complex	<-	1
1478	ACTA1	ARPC5L	complex	-	1
1479	ACTA1	CAPZA1	predicted	-	0.92
1480	ACTA1	CAPZB	predicted	-	0.91
1481	ACTA1	CASP3	activated by	<-	1
1482	ACTA1	CDH1	complex; input	-	1
1483	ACTA1	CDH10	complex; input	-	1
1484	ACTA1	CDH11	complex; input	-	1
1485	ACTA1	CDH12	complex; input	-	1
1486	ACTA1	CDH13	complex; input	-	1
1487	ACTA1	CDH15	complex; input	-	1
1488	ACTA1	CDH16	complex; input	-	1
1489	ACTA1	CDH17	complex; input	-	1
1490	ACTA1	CDH18	complex; input	-	1
1491	ACTA1	CDH19	complex; input	-	1
1492	ACTA1	CDH20	complex; input	-	1
1493	ACTA1	CDH22	complex; input	-	1
1494	ACTA1	CDH23	complex; input	-	1
1495	ACTA1	CDH24	complex; input	-	1
1496	ACTA1	CDH3	complex; input	-	1
1497	ACTA1	CDH4	complex; input	-	1
1498	ACTA1	CDH5	complex; input	-	1
1499	ACTA1	CDH6	complex; input	-	1
1500	ACTA1	CDH7	complex; input	-	1
1501	ACTA1	CDH8	complex; input	-	1
1502	ACTA1	CDH9	complex; input	-	1
1503	ACTA1	CDHR1	complex; input	-	1
1504	ACTA1	CDHR2	complex; input	-	1
1505	ACTA1	CELSR1	complex; input	-	1
1506	ACTA1	CELSR2	complex; input	-	1
1507	ACTA1	CELSR3	complex; input	-	1
1508	ACTA1	CFL1	activated by	<-	1
1509	ACTA1	CFL2	predicted	-	0.89
1510	ACTA1	CTCF	expression regulated by	<-	1
1511	ACTA1	CTNNA1	complex	-	1
1512	ACTA1	CTNNA2	complex	-	1
1513	ACTA1	CTNNB1	catalyzed by; complex; input	<-	1
1514	ACTA1	DCHS1	complex; input	-	1
1515	ACTA1	DIAPH1	activated by	<-	1
1516	ACTA1	DSTN	predicted	-	0.89
1517	ACTA1	EGR1	expression regulated by	<-	1
1518	ACTA1	FAT1	complex; input	-	1
1519	ACTA1	FAT2	complex; input	-	1
1520	ACTA1	GSN	activated by	<-	1
1521	ACTA1	HDAC1	predicted	-	0.95
1522	ACTA1	HIP1	complex; input	-	1
1523	ACTA1	HSF1	predicted	-	0.89
1524	ACTA1	HTT	complex; input	-	1
1525	ACTA1	JUP	complex	-	1
1526	ACTA1	MMP1	catalyzed by	<-	1
1527	ACTA1	MMP13	catalyzed by	<-	1
1528	ACTA1	MMP14	catalyzed by	<-	1
1529	ACTA1	MMP15	catalyzed by	<-	1
1530	ACTA1	MMP16	catalyzed by	<-	1
1531	ACTA1	MMP19	catalyzed by	<-	1
1532	ACTA1	MMP2	catalyzed by	<-	1
1533	ACTA1	MMP20	catalyzed by	<-	1
1534	ACTA1	MMP21	catalyzed by	<-	1
1535	ACTA1	MMP23B	catalyzed by	<-	1
1536	ACTA1	MMP24	catalyzed by	<-	1
1537	ACTA1	MMP25	catalyzed by	<-	1
1538	ACTA1	MMP27	catalyzed by	<-	1
1539	ACTA1	MMP7	catalyzed by	<-	1
1540	ACTA1	MMP8	catalyzed by	<-	1
1541	ACTA1	MMP9	catalyzed by	<-	1
1542	ACTA1	MRTFA	complex	-	1
1543	ACTA1	MYH1	complex; input	-	1
1544	ACTA1	MYH10	complex; input	-	1
1545	ACTA1	MYH11	complex; input	-	1
1546	ACTA1	MYH13	complex; input	-	1
1547	ACTA1	MYH14	complex; input	-	1
1548	ACTA1	MYH2	complex; input	-	1
1549	ACTA1	MYH3	complex; input	-	1
1550	ACTA1	MYH4	complex; input	-	1
1551	ACTA1	MYH6	complex; input	-	1
1552	ACTA1	MYH7	complex; input	-	1
1553	ACTA1	MYH7B	complex; input	-	1
1554	ACTA1	MYH8	complex; input	-	1
1555	ACTA1	MYH9	complex; input	-	1
1556	ACTA1	NFATC1	catalyzed by	<-	1
1557	ACTA1	NFATC2	catalyzed by	<-	1
1558	ACTA1	NFATC3	catalyzed by	<-	1
1559	ACTA1	NFATC4	catalyzed by	<-	1
1560	ACTA1	PCDH1	complex; input	-	1
1561	ACTA1	PCDH10	complex; input	-	1
1562	ACTA1	PCDH11X	complex; input	-	1
1563	ACTA1	PCDH11Y	complex; input	-	1
1564	ACTA1	PCDH12	complex; input	-	1
1565	ACTA1	PCDH15	complex; input	-	1
1566	ACTA1	PCDH20	complex; input	-	1
1567	ACTA1	PCDH7	complex; input	-	1
1568	ACTA1	PCDH8	complex; input	-	1
1569	ACTA1	PCDH9	complex; input	-	1
1570	ACTA1	PCDHA1	complex; input	-	1
1571	ACTA1	PCDHA10	complex; input	-	1
1572	ACTA1	PCDHA11	complex; input	-	1
1573	ACTA1	PCDHA12	complex; input	-	1
1574	ACTA1	PCDHA13	complex; input	-	1
1575	ACTA1	PCDHA2	complex; input	-	1
1576	ACTA1	PCDHA3	complex; input	-	1
1577	ACTA1	PCDHA4	complex; input	-	1
1578	ACTA1	PCDHA5	complex; input	-	1
1579	ACTA1	PCDHA6	complex; input	-	1
1580	ACTA1	PCDHA7	complex; input	-	1
1581	ACTA1	PCDHA8	complex; input	-	1
1582	ACTA1	PCDHA9	complex; input	-	1
1583	ACTA1	PCDHAC1	complex; input	-	1
1584	ACTA1	PCDHAC2	complex; input	-	1
1585	ACTA1	PCDHB1	complex; input	-	1
1586	ACTA1	PCDHB10	complex; input	-	1
1587	ACTA1	PCDHB11	complex; input	-	1
1588	ACTA1	PCDHB12	complex; input	-	1
1589	ACTA1	PCDHB13	complex; input	-	1
1590	ACTA1	PCDHB14	complex; input	-	1
1591	ACTA1	PCDHB15	complex; input	-	1
1592	ACTA1	PCDHB16	complex; input	-	1
1593	ACTA1	PCDHB2	complex; input	-	1
1594	ACTA1	PCDHB3	complex; input	-	1
1595	ACTA1	PCDHB4	complex; input	-	1
1596	ACTA1	PCDHB5	complex; input	-	1
1597	ACTA1	PCDHB6	complex; input	-	1
1598	ACTA1	PCDHB7	complex; input	-	1
1599	ACTA1	PCDHB8	complex; input	-	1
1600	ACTA1	PCDHGA1	complex; input	-	1
1601	ACTA1	PCDHGA10	complex; input	-	1
1602	ACTA1	PCDHGA11	complex; input	-	1
1603	ACTA1	PCDHGA12	complex; input	-	1
1604	ACTA1	PCDHGA2	complex; input	-	1
1605	ACTA1	PCDHGA3	complex; input	-	1
1606	ACTA1	PCDHGA5	complex; input	-	1
1607	ACTA1	PCDHGA6	complex; input	-	1
1608	ACTA1	PCDHGA7	complex; input	-	1
1609	ACTA1	PCDHGA8	complex; input	-	1
1610	ACTA1	PCDHGB1	complex; input	-	1
1611	ACTA1	PCDHGB2	complex; input	-	1
1612	ACTA1	PCDHGB4	complex; input	-	1
1613	ACTA1	PCDHGB6	complex; input	-	1
1614	ACTA1	PCDHGB7	complex; input	-	1
1615	ACTA1	PCDHGC3	complex; input	-	1
1616	ACTA1	PCDHGC4	complex; input	-	1
1617	ACTA1	PCDHGC5	complex; input	-	1
1618	ACTA1	POTEF	predicted	-	0.93
1619	ACTA1	RAC1	catalyzed by	<-	1
1620	ACTA1	RHOG	catalyzed by	<-	1
1621	ACTA1	RHOJ	catalyzed by	<-	1
1622	ACTA1	RHOQ	catalyzed by	<-	1
1623	ACTA1	RPS7	predicted	-	0.92
1624	ACTA1	TPM1	predicted	-	0.97
1625	ACTA1	TPM2	predicted	-	0.99
1626	ACTA1	TPM3	predicted	-	0.97
1627	ACTA1	TPM4	predicted	-	0.9
1628	ACTA1	TRIM63	predicted	-	0.9
1629	ACTA1	VIM	predicted	-	0.89
1630	ACTA2	ACTBL2	predicted	-	0.92
1631	ACTA2	ACTC1	predicted	-	0.9
1632	ACTA2	ACTG2	predicted	-	0.96
1633	ACTA2	ADAM17	catalyzed by	<-	1
1634	ACTA2	AP2A1	complex; input	-	1
1635	ACTA2	AP2A2	complex; input	-	1
1636	ACTA2	ARPC1A	complex	-	1
1637	ACTA2	ARPC1B	complex	-	1
1638	ACTA2	ARPC4	catalyzed by	<-	1
1639	ACTA2	ARPC5	catalyzed by; complex	<-	1
1640	ACTA2	ARPC5L	complex	-	1
1641	ACTA2	CALD1	complex	-	1
1642	ACTA2	CCT5	predicted	-	0.89
1643	ACTA2	CDH1	complex; input	-	1
1644	ACTA2	CDH10	complex; input	-	1
1645	ACTA2	CDH11	complex; input	-	1
1646	ACTA2	CDH12	complex; input	-	1
1647	ACTA2	CDH13	complex; input	-	1
1648	ACTA2	CDH15	complex; input	-	1
1649	ACTA2	CDH16	complex; input	-	1
1650	ACTA2	CDH17	complex; input	-	1
1651	ACTA2	CDH18	complex; input	-	1
1652	ACTA2	CDH19	complex; input	-	1
1653	ACTA2	CDH20	complex; input	-	1
1654	ACTA2	CDH22	complex; input	-	1
1655	ACTA2	CDH23	complex; input	-	1
1656	ACTA2	CDH24	complex; input	-	1
1657	ACTA2	CDH3	complex; input	-	1
1658	ACTA2	CDH4	complex; input	-	1
1659	ACTA2	CDH5	complex; input	-	1
1660	ACTA2	CDH6	complex; input	-	1
1661	ACTA2	CDH7	complex; input	-	1
1662	ACTA2	CDH8	complex; input	-	1
1663	ACTA2	CDH9	complex; input	-	1
1664	ACTA2	CDHR1	complex; input	-	1
1665	ACTA2	CDHR2	complex; input	-	1
1666	ACTA2	CELSR1	complex; input	-	1
1667	ACTA2	CELSR2	complex; input	-	1
1668	ACTA2	CELSR3	complex; input	-	1
1669	ACTA2	CFL1	predicted	-	0.95
1670	ACTA2	CNN2	predicted	-	0.93
1671	ACTA2	CTNNA1	complex	-	1
1672	ACTA2	CTNNA2	complex	-	1
1673	ACTA2	CTNNB1	catalyzed by; complex; input	<-	1
1674	ACTA2	DCHS1	complex; input	-	1
1675	ACTA2	DDX3X	predicted	-	0.89
1676	ACTA2	FAT1	complex; input	-	1
1677	ACTA2	FAT2	complex; input	-	1
1678	ACTA2	HIP1	complex; input	-	1
1679	ACTA2	HTT	complex; input	-	1
1680	ACTA2	ITGA1	complex	-	1
1681	ACTA2	ITGB5	complex	-	1
1682	ACTA2	JUP	complex	-	1
1683	ACTA2	LMOD1	complex	-	1
1684	ACTA2	MMP1	catalyzed by	<-	1
1685	ACTA2	MMP13	catalyzed by	<-	1
1686	ACTA2	MMP14	catalyzed by	<-	1
1687	ACTA2	MMP15	catalyzed by	<-	1
1688	ACTA2	MMP16	catalyzed by	<-	1
1689	ACTA2	MMP19	catalyzed by	<-	1
1690	ACTA2	MMP2	catalyzed by	<-	1
1691	ACTA2	MMP20	catalyzed by	<-	1
1692	ACTA2	MMP21	catalyzed by	<-	1
1693	ACTA2	MMP23B	catalyzed by	<-	1
1694	ACTA2	MMP24	catalyzed by	<-	1
1695	ACTA2	MMP25	catalyzed by	<-	1
1696	ACTA2	MMP27	catalyzed by	<-	1
1697	ACTA2	MMP7	catalyzed by	<-	1
1698	ACTA2	MMP8	catalyzed by	<-	1
1699	ACTA2	MMP9	catalyzed by	<-	1
1700	ACTA2	MYH1	complex; input	-	1
1701	ACTA2	MYH10	complex; input	-	1
1702	ACTA2	MYH11	catalyzed by; complex; input	<-	1
1703	ACTA2	MYH13	complex; input	-	1
1704	ACTA2	MYH14	complex; input	-	1
1705	ACTA2	MYH2	complex; input	-	1
1706	ACTA2	MYH3	complex; input	-	1
1707	ACTA2	MYH4	complex; input	-	1
1708	ACTA2	MYH6	complex; input	-	1
1709	ACTA2	MYH7	complex; input	-	1
1710	ACTA2	MYH7B	complex; input	-	1
1711	ACTA2	MYH8	complex; input	-	1
1712	ACTA2	MYH9	complex; input	-	1
1713	ACTA2	MYL10	catalyzed by; complex; input	<-	1
1714	ACTA2	MYL11	catalyzed by; complex; input	<-	1
1715	ACTA2	MYL12A	catalyzed by; complex; input	<-	1
1716	ACTA2	MYL12B	catalyzed by; complex; input	<-	1
1717	ACTA2	MYL5	catalyzed by; complex; input	<-	1
1718	ACTA2	MYL6	catalyzed by; complex; input	<-	1
1719	ACTA2	MYL6B	catalyzed by; complex; input	<-	1
1720	ACTA2	MYL7	catalyzed by; complex; input	<-	1
1721	ACTA2	MYL9	catalyzed by; complex; input	<-	1
1722	ACTA2	NFATC1	catalyzed by	<-	1
1723	ACTA2	NFATC2	catalyzed by	<-	1
1724	ACTA2	NFATC3	catalyzed by	<-	1
1725	ACTA2	NFATC4	catalyzed by	<-	1
1726	ACTA2	PCDH1	complex; input	-	1
1727	ACTA2	PCDH10	complex; input	-	1
1728	ACTA2	PCDH11X	complex; input	-	1
1729	ACTA2	PCDH11Y	complex; input	-	1
1730	ACTA2	PCDH12	complex; input	-	1
1731	ACTA2	PCDH15	complex; input	-	1
1732	ACTA2	PCDH20	complex; input	-	1
1733	ACTA2	PCDH7	complex; input	-	1
1734	ACTA2	PCDH8	complex; input	-	1
1735	ACTA2	PCDH9	complex; input	-	1
1736	ACTA2	PCDHA1	complex; input	-	1
1737	ACTA2	PCDHA10	complex; input	-	1
1738	ACTA2	PCDHA11	complex; input	-	1
1739	ACTA2	PCDHA12	complex; input	-	1
1740	ACTA2	PCDHA13	complex; input	-	1
1741	ACTA2	PCDHA2	complex; input	-	1
1742	ACTA2	PCDHA3	complex; input	-	1
1743	ACTA2	PCDHA4	complex; input	-	1
1744	ACTA2	PCDHA5	complex; input	-	1
1745	ACTA2	PCDHA6	complex; input	-	1
1746	ACTA2	PCDHA7	complex; input	-	1
1747	ACTA2	PCDHA8	complex; input	-	1
1748	ACTA2	PCDHA9	complex; input	-	1
1749	ACTA2	PCDHAC1	complex; input	-	1
1750	ACTA2	PCDHAC2	complex; input	-	1
1751	ACTA2	PCDHB1	complex; input	-	1
1752	ACTA2	PCDHB10	complex; input	-	1
1753	ACTA2	PCDHB11	complex; input	-	1
1754	ACTA2	PCDHB12	complex; input	-	1
1755	ACTA2	PCDHB13	complex; input	-	1
1756	ACTA2	PCDHB14	complex; input	-	1
1757	ACTA2	PCDHB15	complex; input	-	1
1758	ACTA2	PCDHB16	complex; input	-	1
1759	ACTA2	PCDHB2	complex; input	-	1
1760	ACTA2	PCDHB3	complex; input	-	1
1761	ACTA2	PCDHB4	complex; input	-	1
1762	ACTA2	PCDHB5	complex; input	-	1
1763	ACTA2	PCDHB6	complex; input	-	1
1764	ACTA2	PCDHB7	complex; input	-	1
1765	ACTA2	PCDHB8	complex; input	-	1
1766	ACTA2	PCDHGA1	complex; input	-	1
1767	ACTA2	PCDHGA10	complex; input	-	1
1768	ACTA2	PCDHGA11	complex; input	-	1
1769	ACTA2	PCDHGA12	complex; input	-	1
1770	ACTA2	PCDHGA2	complex; input	-	1
1771	ACTA2	PCDHGA3	complex; input	-	1
1772	ACTA2	PCDHGA5	complex; input	-	1
1773	ACTA2	PCDHGA6	complex; input	-	1
1774	ACTA2	PCDHGA7	complex; input	-	1
1775	ACTA2	PCDHGA8	complex; input	-	1
1776	ACTA2	PCDHGB1	complex; input	-	1
1777	ACTA2	PCDHGB2	complex; input	-	1
1778	ACTA2	PCDHGB4	complex; input	-	1
1779	ACTA2	PCDHGB6	complex; input	-	1
1780	ACTA2	PCDHGB7	complex; input	-	1
1781	ACTA2	PCDHGC3	complex; input	-	1
1782	ACTA2	PCDHGC4	complex; input	-	1
1783	ACTA2	PCDHGC5	complex; input	-	1
1784	ACTA2	PDCL3	predicted	-	0.89
1785	ACTA2	POTEKP	predicted	-	0.89
1786	ACTA2	PXN	complex	-	1
1787	ACTA2	RAC1	catalyzed by	<-	1
1788	ACTA2	RHOG	catalyzed by	<-	1
1789	ACTA2	RHOJ	catalyzed by	<-	1
1790	ACTA2	RHOQ	catalyzed by	<-	1
1791	ACTA2	RPL23	predicted	-	0.89
1792	ACTA2	RPS15A	predicted	-	0.89
1793	ACTA2	SORBS1	complex	-	1
1794	ACTA2	SORBS3	complex	-	1
1795	ACTA2	TLN1	complex	-	1
1796	ACTA2	TPM1	complex	-	1
1797	ACTA2	TPM2	complex	-	1
1798	ACTA2	TPM3	complex	-	1
1799	ACTA2	TPM4	complex	-	1
1800	ACTA2	VCL	complex	-	1
1801	ACTB	ACTBL2	input	-	1
1802	ACTB	ACTG1	input	-	1
1803	ACTB	ACTL6A	complex	-	1
1804	ACTB	ACTN1	complex; input	-	1
1805	ACTB	ACTN2	complex; input	-	1
1806	ACTB	ACTN4	complex; input	-	1
1807	ACTB	ACTR2	complex; input	-	1
1808	ACTB	ACTR3	complex; input	-	1
1809	ACTB	ACTR5	complex	-	1
1810	ACTB	ACTR8	complex	-	1
1811	ACTB	ADAM17	catalyzed by	<-	1
1812	ACTB	AP2A1	complex; input	-	1
1813	ACTB	AP2A2	complex; input	-	1
1814	ACTB	ARID1A	complex	-	1
1815	ACTB	ARID1B	complex	-	1
1816	ACTB	ARPC1A	complex; input	-	1
1817	ACTB	ARPC1B	complex; input	-	1
1818	ACTB	ARPC2	complex; input	-	1
1819	ACTB	ARPC3	complex; input	-	1
1820	ACTB	ARPC4	catalyzed by; complex; input	<-	1
1821	ACTB	ARPC5	catalyzed by; complex; input	<-	1
1822	ACTB	ARPC5L	complex	-	1
1823	ACTB	ATF2	complex; reaction	-	1
1824	ACTB	BAIAP2	complex; input	-	1
1825	ACTB	BAZ1B	input	-	1
1826	ACTB	BCL7A	complex	-	1
1827	ACTB	BCL7B	complex	-	1
1828	ACTB	BCL7C	complex	-	1
1829	ACTB	BRD8	complex	-	1
1830	ACTB	BRK1	complex; input	-	1
1831	ACTB	CCT2	complex; input	-	1
1832	ACTB	CCT3	complex; input	-	1
1833	ACTB	CCT4	complex; input	-	1
1834	ACTB	CCT5	complex; input	-	1
1835	ACTB	CCT6A	complex; input	-	1
1836	ACTB	CCT7	complex; input	-	1
1837	ACTB	CCT8	complex; input	-	1
1838	ACTB	CDC42	complex; input	-	1
1839	ACTB	CDH1	complex; input	-	1
1840	ACTB	CDH10	complex; input	-	1
1841	ACTB	CDH11	complex; input	-	1
1842	ACTB	CDH12	complex; input	-	1
1843	ACTB	CDH13	complex; input	-	1
1844	ACTB	CDH15	complex; input	-	1
1845	ACTB	CDH16	complex; input	-	1
1846	ACTB	CDH17	complex; input	-	1
1847	ACTB	CDH18	complex; input	-	1
1848	ACTB	CDH19	complex; input	-	1
1849	ACTB	CDH20	complex; input	-	1
1850	ACTB	CDH22	complex; input	-	1
1851	ACTB	CDH23	complex; input	-	1
1852	ACTB	CDH24	complex; input	-	1
1853	ACTB	CDH3	complex; input	-	1
1854	ACTB	CDH4	complex; input	-	1
1855	ACTB	CDH5	complex; input	-	1
1856	ACTB	CDH6	complex; input	-	1
1857	ACTB	CDH7	complex; input	-	1
1858	ACTB	CDH8	complex; input	-	1
1859	ACTB	CDH9	complex; input	-	1
1860	ACTB	CDHR1	complex; input	-	1
1861	ACTB	CDHR2	complex; input	-	1
1862	ACTB	CELSR1	complex; input	-	1
1863	ACTB	CELSR2	complex; input	-	1
1864	ACTB	CELSR3	complex; input	-	1
1865	ACTB	CETN2	activate	->	1
1866	ACTB	COL10A1	complex; input	-	1
1867	ACTB	COL11A1	complex; input	-	1
1868	ACTB	COL11A2	complex; input	-	1
1869	ACTB	COL12A1	complex; input	-	1
1870	ACTB	COL13A1	complex; input	-	1
1871	ACTB	COL14A1	complex; input	-	1
1872	ACTB	COL15A1	complex; input	-	1
1873	ACTB	COL16A1	complex; input	-	1
1874	ACTB	COL17A1	complex; input	-	1
1875	ACTB	COL1A1	complex; input	-	1
1876	ACTB	COL1A2	complex; input	-	1
1877	ACTB	COL20A1	complex; input	-	1
1878	ACTB	COL27A1	complex; input	-	1
1879	ACTB	COL2A1	complex; input	-	1
1880	ACTB	COL3A1	complex; input	-	1
1881	ACTB	COL4A1	complex; input	-	1
1882	ACTB	COL4A2	complex; input	-	1
1883	ACTB	COL4A3	complex; input	-	1
1884	ACTB	COL4A4	complex; input	-	1
1885	ACTB	COL4A5	complex; input	-	1
1886	ACTB	COL4A6	complex; input	-	1
1887	ACTB	COL5A1	complex; input	-	1
1888	ACTB	COL5A2	complex; input	-	1
1889	ACTB	COL5A3	complex; input	-	1
1890	ACTB	COL6A1	complex; input	-	1
1891	ACTB	COL6A2	complex; input	-	1
1892	ACTB	COL6A3	complex; input	-	1
1893	ACTB	COL8A1	complex; input	-	1
1894	ACTB	COL8A2	complex; input	-	1
1895	ACTB	COL9A1	complex; input	-	1
1896	ACTB	COL9A2	complex; input	-	1
1897	ACTB	COL9A3	complex; input	-	1
1898	ACTB	COPS2	activate	->	1
1899	ACTB	COPS3	activate	->	1
1900	ACTB	COPS4	activate	->	1
1901	ACTB	COPS5	activate	->	1
1902	ACTB	COPS6	activate	->	1
1903	ACTB	COPS7A	activate	->	1
1904	ACTB	COPS7B	activate	->	1
1905	ACTB	COPS8	activate	->	1
1906	ACTB	CTNNA1	complex	-	1
1907	ACTB	CTNNA2	complex	-	1
1908	ACTB	CTNNB1	catalyzed by; complex; input	<-	1
1909	ACTB	CUL4A	activate	->	1
1910	ACTB	CUL4B	activate	->	1
1911	ACTB	CYFIP1	complex; input	-	1
1912	ACTB	CYFIP2	complex; input	-	1
1913	ACTB	DCHS1	complex; input	-	1
1914	ACTB	DDB1	activate	->	1
1915	ACTB	DDB2	activate	->	1
1916	ACTB	DDX21	input	-	1
1917	ACTB	DEK	input	-	1
1918	ACTB	DIAPH1	complex; input	-	1
1919	ACTB	DMAP1	complex	-	1
1920	ACTB	DMBT1	complex; input	-	1
1921	ACTB	DPF1	complex	-	1
1922	ACTB	DPF2	complex	-	1
1923	ACTB	DPF3	complex	-	1
1924	ACTB	EP400	complex	-	1
1925	ACTB	EPC1	complex	-	1
1926	ACTB	ERCC6	input	-	1
1927	ACTB	EVL	complex; input	-	1
1928	ACTB	FAT1	complex; input	-	1
1929	ACTB	FAT2	complex; input	-	1
1930	ACTB	FLNA	complex; input	-	1
1931	ACTB	FLNB	complex; input	-	1
1932	ACTB	FMNL1	complex; input	-	1
1933	ACTB	FMNL2	complex; input	-	1
1934	ACTB	FMNL3	complex; input	-	1
1935	ACTB	FN1	complex; input	-	1
1936	ACTB	GPS1	activate	->	1
1937	ACTB	GRB2	complex; input	-	1
1938	ACTB	GSK3B	activated by	<-	1
1939	ACTB	GTF2A1	complex; reaction	-	1
1940	ACTB	GTF2B	complex; reaction	-	1
1941	ACTB	GTF3A	complex; reaction	-	1
1942	ACTB	H4C1	catalyze	->	1
1943	ACTB	HIP1	complex; input	-	1
1944	ACTB	HTT	complex; input	-	1
1945	ACTB	ING3	complex	-	1
1946	ACTB	INO80	complex	-	1
1947	ACTB	INO80B	complex	-	1
1948	ACTB	INO80C	complex	-	1
1949	ACTB	INO80D	complex	-	1
1950	ACTB	INO80E	complex	-	1
1951	ACTB	IRF-1	complex; reaction	-	1
1952	ACTB	IRF2	complex; reaction	-	1
1953	ACTB	IRF3	complex; reaction	-	1
1954	ACTB	IRF7	complex; reaction	-	1
1955	ACTB	ITGA1	complex; input	-	1
1956	ACTB	ITGA10	complex; input	-	1
1957	ACTB	ITGA11	complex; input	-	1
1958	ACTB	ITGA2	complex; input	-	1
1959	ACTB	ITGA2B	complex; input	-	1
1960	ACTB	ITGA3	complex; input	-	1
1961	ACTB	ITGA4	complex; input	-	1
1962	ACTB	ITGA5	complex; input	-	1
1963	ACTB	ITGA6	complex; input	-	1
1964	ACTB	ITGA7	complex; input	-	1
1965	ACTB	ITGA8	complex; input	-	1
1966	ACTB	ITGA9	complex; input	-	1
1967	ACTB	ITGAD	complex; input	-	1
1968	ACTB	ITGAE	complex; input	-	1
1969	ACTB	ITGAL	complex; input	-	1
1970	ACTB	ITGAM	complex; input	-	1
1971	ACTB	ITGAV	complex; input	-	1
1972	ACTB	ITGAX	complex; input	-	1
1973	ACTB	ITGB1	complex; input	-	1
1974	ACTB	ITGB2	complex; input	-	1
1975	ACTB	ITGB4	complex; input	-	1
1976	ACTB	ITGB5	complex; input	-	1
1977	ACTB	ITGB6	complex; input	-	1
1978	ACTB	ITGB7	complex; input	-	1
1979	ACTB	ITGB8	complex; input	-	1
1980	ACTB	ITGBL1	complex; input	-	1
1981	ACTB	ITSN1	complex; input	-	1
1982	ACTB	JUN	complex; reaction	-	1
1983	ACTB	JUP	complex	-	1
1984	ACTB	KAT2B	complex; reaction	-	1
1985	ACTB	KAT5	complex	-	1
1986	ACTB	LAMA1	complex; input	-	1
1987	ACTB	LAMA2	complex; input	-	1
1988	ACTB	LAMA3	complex; input	-	1
1989	ACTB	LAMA4	complex; input	-	1
1990	ACTB	LAMA5	complex; input	-	1
1991	ACTB	LAMB1	complex; input	-	1
1992	ACTB	LAMB2	complex; input	-	1
1993	ACTB	LAMB3	complex; input	-	1
1994	ACTB	LAMB4	complex; input	-	1
1995	ACTB	LAMC1	complex; input	-	1
1996	ACTB	LAMC2	complex; input	-	1
1997	ACTB	LAMC3	complex; input	-	1
1998	ACTB	LIMS1	input	-	1
[truncated: 267,771+ more rows]

## Sheet: Table S3
Table S3_PTC_specific_GIs
p.value_top3000	SD_top3000	Overlap_GIs (n=1262)
BMP15_GDF1	CDH16_CDH3	NUP155_ZC3H11A
FOXD4L6_ZBTB9	SERPINA1_SERPINA3	CPSF3_ZC3H11A
CER1_GDF1	NUP155_ZC3H11A	SLU7_ZC3H11A
ALX3_SOX10	CPSF3_ZC3H11A	CSTF2_ZC3H11A
CDH9_PCDH20	HIRA_HMGA2	THOC5_ZC3H11A
PAX3_SOX10	SLU7_ZC3H11A	GLE1_ZC3H11A
PIK3R2_PIK3R3	CSTF2_ZC3H11A	CCT7_EEF1G
CDH18_PCDH20	THOC5_ZC3H11A	MAGOH_ZC3H11A
CIDEA_CIDEB	GLE1_ZC3H11A	EEF1B2_EEF1G
PSMB11_UBD	CCT7_EEF1G	CSTF2T_ZC3H11A
FXYD1_FXYD4	MAGOH_ZC3H11A	EEF1G_SNW1
CDH12_PCDH20	EEF1B2_EEF1G	EEF1G_SNRNP200
NHLH1_ZBTB9	CSTF2T_ZC3H11A	ARPC1B_FCGR3A
FOXD3_SOX10	EEF1G_SNW1	EEF1G_YWHAE
CDH7_PCDH20	ARPC1B_NCKAP1L	EEF1A1_EEF1G
CRYAA_HSPB2	EEF1G_SNRNP200	THOC7_ZC3H11A
RPL7A_RPS3A	EEF1A2_EEF1G	ATP6V0C_DEPDC5
RPL7_RPS3A	ARPC1B_FCGR3A	NUP107_ZC3H11A
EEF1A1_EEF1G	EEF1G_YWHAE	EEF1G_HSPA5
RPL17_RPL7	EEF1A1_EEF1G	ATG3_GABARAP
RPL17_RPL5	THOC7_ZC3H11A	NCBP1_ZC3H11A
RPL17_RPS27A	ATP6V0C_DEPDC5	CLP1_ZC3H11A
RPL15_RPL17	NUP107_ZC3H11A	ATP6V0A2_ATP6V0C
RPL17_RPS3A	EEF1G_HSPA5	GABARAP_PIK3C3
RPL17_RPL19	ATG3_GABARAP	CPSF2_ZC3H11A
RPL17_RPS6	COL9A3_LAMB3	SEC13_ZC3H11A
RPL17_RPL4	NCBP1_ZC3H11A	EIF4A3_ZC3H11A
RPL17_RPS3	CLP1_ZC3H11A	CDC40_ZC3H11A
RPL17_RPL7A	ATP6V0A2_ATP6V0C	NUP133_ZC3H11A
RPL17_RPS11	GABARAP_PIK3C3	NUP37_ZC3H11A
RPL17_RPL8	RPP14_RPS4Y1	NUP62_ZC3H11A
RPL11_RPL17	COL27A1_LAMB3	CSTF1_ZC3H11A
RPL17_RPL6	HLA-DQA2_KLC1	NUP35_ZC3H11A
RPL17_RPS8	CPSF2_ZC3H11A	NUP188_ZC3H11A
RPL27A_RPS3A	SEC13_ZC3H11A	ATG7_GABARAP
RPL17_RPLP0	RPS4Y1_SEC61B	NUP205_ZC3H11A
RPL17_RPL27A	EIF4A3_ZC3H11A	CHMP7_GABARAP
EEF2_RPL17	CTSD_HLA-DQA2	NUP210_ZC3H11A
RPL17_RPL3	COL23A1_ITGA2	THOC3_ZC3H11A
RPL10_RPL17	CDC40_ZC3H11A	UPF3B_ZC3H11A
RPL11_RPS3A	NUP54_ZC3H11A	ATP6V0C_ATP6V1D
EEF1A1_RPL17	HLA-DQA2_LAT	NXT1_ZC3H11A
RPL13_RPL17	NUP133_ZC3H11A	DRG1_RPS10
RPL13A_RPL17	NUP37_ZC3H11A	EIF2AK4_RPL17
RPL17_RPL23	RPS27L_RPS4Y1	GABARAP_PIK3R4
RPS24_RPS3A	NUP62_ZC3H11A	EIF2AK4_RPS10
RPL17_RPS18	CSTF1_ZC3H11A	NUP98_ZC3H11A
RPL17_RPS4X	MAGOH_RPS4Y1	MAGOH_RPS10
RPL17_RPL26	NUP35_ZC3H11A	NUP93_ZC3H11A
RPL26_RPL31	RPS21_RPS4Y1	ATP6V0C_FNIP2
RPL11_RPL26	NUP188_ZC3H11A	MAGOHB_ZC3H11A
RPL23_RPS23	EIF2AK4_RPS4Y1	SEH1L_ZC3H11A
RPL26_RPL30	ATG7_GABARAP	CHMP2A_GABARAP
RPL17_RPSA	EIF4A1_ISG15	ATG4A_GABARAP
RPL26_RPL32	NUP205_ZC3H11A	ATP6V0C_FNIP1
RPL17_RPS24	HLA-DQA1_KLC1	GABARAP_UVRAG
RPL26_RPL5	CHMP7_GABARAP	RAE1_ZC3H11A
RPL26_RPS20	RPL17_RPS4Y1	NUP43_ZC3H11A
RPL10A_RPL17	EIF2S3_RPS4Y1	ATG4C_GABARAP
RPL17_RPS12	NUP210_ZC3H11A	NUP153_ZC3H11A
RPL23_RPL26	CDH3_PCDHGC3	AAAS_ZC3H11A
RPL17_RPLP1	THOC3_ZC3H11A	DRG1_RPL17
RPL17_RPL18A	UPF3B_ZC3H11A	NUP88_ZC3H11A
RPL17_RPS23	ATP6V0C_ATP6V1D	ATP6V0C_ATP6V1A
RPL26_RPS27	RPS4Y1_SSR4	MAGOH_RPL17
RPL14_RPL26	RPL26L1_RPS4Y1	THOC6_ZC3H11A
RPL26_RPS12	MMP7_SRCAP	ATP6V0C_SLC38A9
RPL17_RPS27	NXT1_ZC3H11A	GPS2_MED1
RPL26_RPL7	EIF4A3_RPS4Y1	ILK_ITGB4
RPL10A_RPL26	RIOK2_RPS4Y1	NUP160_ZC3H11A
RPL26_RPL6	ARPC1B_CYFIP2	GNAI1_RGS5
RPL24_RPL26	HLA-DQA1_LAT	NUP214_ZC3H11A
RPL26_RPL27A	RPL36AL_RPS4Y1	ATG5_GABARAP
RPL17_RPS2	DRG1_RPS10	GABARAP_ULK2
RPL17_RPL30	ARPC1B_FCGR2A	DTNBP1_TXNDC5
RPL17_RPS9	RPS26P11_RPS4Y1	TPR_ZC3H11A
RPS12_RPS23	RGS5_RGS8	RANBP2_ZC3H11A
RPL26_RPS8	EIF2AK4_RPL17	NCBP2_ZC3H11A
RPL17_RPL37A	GABARAP_PIK3R4	RIOK2_RPS10
RPL12_RPL26	RPS4Y1_SEC11C	NUP85_ZC3H11A
RPL19_RPL26	RPS4Y1_SRP54	GABARAP_TBC1D25
RPL17_RPL24	CHMP4C_GABARAP	ATP6V0C_RPTOR
RPL17_RPL31	EIF1AX_RPS4Y1	CPSF4_ZC3H11A
RPL17_RPL32	EIF2AK4_RPS10	RPS10_SRP54
RPL26_RPS3	RPP14_RPS10	RPL26L1_RPS10
RPL37A_RPS23	NUP98_ZC3H11A	ATP6V0C_ATP6V1B2
RPS10_RPS3	MAGOH_RPS10	CHMP4B_GABARAP
RPL26_RPS27A	NUP93_ZC3H11A	NUP50_ZC3H11A
RPS14_RPS23	RPS4Y1_SSR2	RPL17_SRP54
RPS23_RPS24	GSPT2_RPS4Y1	NCBP1_RPL17
RPL26_RPS3A	CLDN1_F11R	NUDT21_ZC3H11A
RPL17_RPS14	RPL10L_RPS4Y1	NDUFA13_NDUFS4
RPL32_RPS15A	ATP6V0C_FNIP2	ATP6V0C_MIOS
RPL26_RPS25	RPS4Y1_SRPRB	ERCC5_ERCC6
RPL23_RPS10	MAGOHB_ZC3H11A	RPS10_SEC61B
RPS10_RPS14	SEH1L_ZC3H11A	SYMPK_ZC3H11A
RPL26_RPS11	CHMP2A_GABARAP	EIF2AK4_RPL36A
RPL26_RPS24	NCBP1_RPS4Y1	NCBP1_RPS10
RPL12_RPS3A	ATG4A_GABARAP	ATP6V0C_SEC13
RPL17_RPS25	RPL17_RPS26P11	GABARAP_STX17
RPL17_RPS20	RPS4Y1_SSR3	BECN1_GABARAP
RPL26_RPL7A	RPS4Y1_SPCS1	RPL17_RPL26L1
RPL26_RPS4X	RPS4Y1_SRP72	POM121C_ZC3H11A
RPL26_RPL4	EIF2S1_RPS4Y1	GSPT2_RPS10
RPL12_RPL17	PDGFRA_PIK3R3	MAGOH_RPL36A
RPL26_RPS6	ATP6V0C_FNIP1	IMPACT_RPS10
RPS10_RPS12	GABARAP_UVRAG	EIF2S3_RPS10
RPS10_RPS19	RPS10_RPS4Y1	EIF4A3_RPS10
RPL26_RPL37A	EIF2S2_RPS4Y1	POLDIP3_ZC3H11A
RPL13_RPL26	RPL39L_RPS4Y1	RPS10_RPS27L
RPL30_RPL37	RAE1_ZC3H11A	RPS10_SSR4
RPL17_RPL18	NUP43_ZC3H11A	RPS10_SRP72
RPL21_RPS15A	ATG4C_GABARAP	GABARAP_UBQLN1
RPL27A_RPS10	NUP153_ZC3H11A	RPS10_SPCS1
RPL26_RPS7	RPS4Y1_RSL24D1	ATP6V0C_CCDC115
RPL26_RPS18	AAAS_ZC3H11A	PAPOLA_ZC3H11A
RPL15_RPL26	DRG1_RPL17	CASC3_ZC3H11A
RPS10_RPS8	EIF3K_RPS4Y1	GPS2_TGS1
RPL23_RPS15A	RPS26_RPS4Y1	CHMP6_GABARAP
RPL26_RPL37	RPS4Y1_SRP68	EIF2S3_RPL17
RPL26_RPL8	GNA11_RGS5	RIOK1_RPS10
RPL11_RPS10	NUP88_ZC3H11A	WDR33_ZC3H11A
RPL14_RPL17	RPS4Y1_UPF2	EIF2S2_RPS10
RPL17_RPS7	EIF3I_RPS4Y1	ATP6V0C_MTOR
EEF1A1_RPL26	RPS4Y1_SPCS3	ACAD11_ACADM
EEF2_RPL26	ATP6V0C_ATP6V1A	RPL17_UPF3B
RPS10_RPS11	MAGOH_RPL17	EIF3K_RPS10
RPL26_RPS17	THOC6_ZC3H11A	TOMM22_TOMM6
RPL21_RPL26	RPS4Y1_SEC11A	EIF4A1_PARN
RPL26_RPSA	RPS4Y1_SEC61G	ATP6V0C_SEH1L
RPS10_RPS23	RPS29_RPS4Y1	RPL17_SRP72
RPS10_RPS17	CTSD_HLA-DQA1	ATP6V0C_RRAGB
RPL21_RPS10	ATP6V0C_SLC38A9	RPL17_UPF2
RPS15A_RPS17	CSNK1E_RPS4Y1	RPS10_SRP68
RPS10_RPS2	EIF3J_RPS4Y1	IMPACT_RPL17
RPL26_RPL3	NCBP2_RPS4Y1	NDUFA1_NDUFA13
RPS10_RPS9	GPS2_MED1	THOC2_ZC3H11A
RPL17_RPL29	ILK_ITGB4	RNPS1_ZC3H11A
RPL26_RPS16	RPS10_RPS26P11	COPS3_SPSB3
RPL26_RPLP1	IMPACT_RPS4Y1	COMMD1_SPSB3
RPL7A_RPS10	NUP160_ZC3H11A	CNOT10_EIF4A1
RPLP1_RPS10	GRSF1_RPS4Y1	SRRM1_ZC3H11A
RPS10_RPS27A	ZNF444_ZNF460	EIF2S1_RPS10
RPL13A_RPL26	ATP6V0C_ATP6V0D2	RPS10_UPF2
RPL26_RPS5	RIOK1_RPS4Y1	CHMP2B_GABARAP
RPL37A_RPS10	RPL36_RPS4Y1	DHX38_ZC3H11A
RPL18A_RPS10	EIF3D_RPS4Y1	GABARAP_YWHAZ
RPL26_RPL34	EIF4A1_UBE2L6	RPS10_UPF3B
RPS10_RPSA	EIF3H_RPS4Y1	ATP6V0C_ATP6V1G1
RPL10_RPL26	BYSL_RPS4Y1	GABARAP_SQSTM1
RPS10_RPS18	RPL38_RPS4Y1	CSNK2B_TGFBR1
RPL26_RPLP0	EIF3E_RPS4Y1	GABARAP_PDCD6IP
RPS10_RPS7	GNAI1_RGS5	PCF11_ZC3H11A
RPL31_RPS10	NUP214_ZC3H11A	CD74_MIF
RPS10_RPS16	RPL26_RPS4Y1	RPS10_SRPRB
RPS10_RPS3A	ATG5_GABARAP	RPS10_ZC3H15
RPL10A_RPS10	EIF4A1_RPS4Y1	GRSF1_RPS10
RPL17_RPS16	RPN1_RPS4Y1	EIF4A3_RPL17
RPL31_RPS15A	GABARAP_ULK2	RPL36A_SRP54
RPL7_RPS10	RPS23_RPS4Y1	BYSL_RPS10
RPS15A_RPS20	RPS4Y1_SRP14	RPS10_SSR2
RPL17_RPL28	DDX3X_RPS4Y1	NXF1_ZC3H11A
RPL30_RPS10	RPS28_RPS4Y1	RPL17_SSR4
RPL8_RPS10	RPP40_RPS4Y1	EIF3I_RPS10
RPS10_RPS20	PNRC2_RPS4Y1	NDUFA13_NDUFS6
RPL37A_RPS15A	RPP25_RPS4Y1	RPL17_SPCS1
EEF1D_EEF1G	CRABP1_CRABP2	RPS10_RSL24D1
RPL37_RPS15A	DTNBP1_TXNDC5	EIF3J_RPS10
EEF1A1_EEF1D	NOB1_RPS4Y1	RPS10_SEC11C
RPL15_RPS10	PNO1_RPS4Y1	RPL36_RPS10
RPL10_RPS10	MAGOHB_RPS4Y1	DDB2_ERCC5
RPL17_RPS17	TPR_ZC3H11A	ERCC6_GTF2H4
RPL18_RPL26	RANBP2_ZC3H11A	RPL26L1_RPL36A
RPS10_RPS15A	RPN2_RPS4Y1	EIF4A1_FOS
RPS10_RPS24	NCBP2_ZC3H11A	NCBP1_RPL36A
RPS10_RPS27	EIF3A_RPS4Y1	ARHGEF6_ILK
RPL13_RPS10	DDOST_RPS4Y1	EIF3H_RPS10
RPS10_RPS5	ETF1_RPS4Y1	ATP6V0C_ATP6V1E1
RPS10_RPS6	CASP1_EIF4A1	U2AF2_ZC3H11A
RPL26_RPS14	RPP30_RPS4Y1	EIF2S2_RPL17
RPL5_RPS10	RIOK2_RPS10	EIF3E_RPS10
RPL4_RPS10	NUP85_ZC3H11A	GABARAP_GABARAPL2
EEF1G_HSPA5	GABARAP_TBC1D25	EIF2S3_EIF4A1
RPL26_RPS2	ERCC6_MBD3	RPN2_RPS10
RPL19_RPS10	RPS4Y1_UPF3B	LARP4_RPS10
RPS10_RPS4X	RPS13_RPS4Y1	NDUFA13_NDUFS3
RPL17_RPS19	RPL29_RPS4Y1	RPL17_SRP68
RPL18_RPS10	RPL41_RPS4Y1	CASP3_EIF4A1
RPL29_RPS10	PPP2R2A_RPS4Y1	RPL36AL_RPS10
EEF1A1_RPS10	RPS4Y1_TRAM1	CASP2_EIF4A1
RPL17_RPL21	RPL36A_RPS4Y1	EIF4A1_SRP72
RPL32_RPS10	EIF3G_RPS4Y1	EIF3D_RPS10
PABPC1_RPS10	RPL27_RPS4Y1	RPN1_RPS10
RPL3_RPS10	RPS4Y1_UBA52	RPL17_SEC61B
RPL17_RPS15A	ATP6V0C_RPTOR	CCDC22_SPSB3
RPL6_RPS10	HNRNPUL2_TARDBP	GSK3B_ILK
RPL17_RPS5	FAU_RPS4Y1	EIF3A_RPS10
RPLP0_RPS10	RPL3L_RPS4Y1	RPP30_RPS10
RPL14_RPS10	CPSF4_ZC3H11A	HSPA4_TXNDC5
RPS15A_RPS7	RPS10_SRP54	ATP6V0C_SESN2
RPS10_RPS25	RPS15_RPS4Y1	NSA2_RPS10
RPL37_RPS23	RPS4Y1_SMG5	RPS10_RPS29
RPL17_RPL34	RPL37_RPS4Y1	EIF2S1_RPL17
PABPC1_RPL17	RPS4Y1_SSR1	CPSF1_ZC3H11A
RPL22_RPL26	EEFSEC_RPS4Y1	DDX6_EIF4A1
RPL13A_RPS10	RPL39_RPS4Y1	EIF4A1_EIF4A3
RPLP2_RPS10	RPLP2_RPS4Y1	CNOT6_EIF4A1
RPL27_RPS10	RPL30_RPS4Y1	RPS10_RPS26
RPL26_RPL35A	RPL35A_RPS4Y1	RPL17_RPS27L
RPL26_RPS19	EIF3F_RPS4Y1	ATP6V0C_RRAGD
RPL12_RPS15A	RPL9_RPS4Y1	COPS4_SPSB3
PABPC1_RPL26	GSPT1_RPS4Y1	PNO1_RPS10
RPL24_RPS10	RPL26L1_RPS10	GRSF1_RPL17
RPL37_RPS10	RPL37A_RPS4Y1	EEF1D_EEF1G
RPL26_RPL28	RPL21_RPS4Y1	EIF4A1_EIF4E3
RPL17_RPL37	RPS24_RPS4Y1	RPL17_SRPRB
RPS14_RPS15A	RPS4X_RPS4Y1	ACAD9_NDUFA13
RPL12_RPS10	RPL35_RPS4Y1	ATP6V0C_ATP6V1C1
RPL28_RPS10	ATP6V0C_ATP6V1B2	PPP2R2A_RPS10
EEF1G_YWHAE	RPS4Y1_RPS7	RPL17_RPL36
EEF2_RPS10	RPS4Y1_UPF1	RPS10_SEC11A
NPM1_RPS23	RPS14_RPS4Y1	RPL17_RPN2
RPS10_UBA52	RPL32_RPS4Y1	CPSF6_ZC3H11A
RPL26_UBA52	RPL12_RPS4Y1	ATP6V0C_RHEB
RPL27_RPS23	RPL34_RPS4Y1	RPS10_SSR3
RPL41_RPS23	PABPC1_RPS4Y1	RPS10_SEC61G
RPL34_RPS10	CCL14_CCL22	EIF4A1_PAIP1
RPL26_RPL27	CDH16_CDH6	CDK7_ERCC5
RPL23A_RPS10	RPS4Y1_RPS5	IMPACT_RPL36A
FAU_RPS10	RPL23_RPS4Y1	RPL9_RPS10
FUS_HNRNPL	PPP2R1A_RPS4Y1	ILK_PARP1
EIF4B_RPS10	RPL11_RPS4Y1	RPS10_UBA52
HNRNPL_ILF3	RPL31_RPS4Y1	ATP6AP1_ATP6V0C
EEF1G_SNRNP200	RPS20_RPS4Y1	EIF2S3_RPL36A
RPL17_RPL22	EIF4B_RPS4Y1	GSPT1_RPS10
RPL41_RPS10	RPS19_RPS4Y1	GPS2_NCOA2
RPL26_RPLP2	HLA-DRB5_KLC1	RPS10_RPS24
EIF4A2_RPS10	RPL14_RPS4Y1	RPL37_RPS10
EIF4H_RPS10	RPS4Y1_SMG7	RNF7_SPSB3
RPL17_RPL35A	RPL27A_RPS4Y1	EIF2S2_EIF4A1
HNRNPL_HNRNPU	RPS27_RPS4Y1	RPS10_RPS15
RPL41_RPS15A	RPL24_RPS4Y1	RPL21_RPS10
RPL17_RPL23A	CHMP4B_GABARAP	NCBP2_RPS10
RPL35A_RPS10	NUP50_ZC3H11A	RPL32_RPS10
HNRNPL_NONO	RPS25_RPS4Y1	RPL36A_SRP72
RPS15A_UBA52	RPL28_RPS4Y1	ATP6V0A1_ATP6V0C
RPL17_RPL9	RPL19_RPS4Y1	RPL17_SECISBP2
RPL22_RPS10	RPS18_RPS4Y1	GPS2_KDM4A
EIF4G1_RPS10	RPL17_SRP54	CNOT2_EIF4A1
RPS10_RPS15	RPS27A_RPS4Y1	RPL12_RPS10
GABARAP_YWHAZ	RPS4Y1_RPS9	PABPC1_RPS10
RPL17_RPS13	RPLP1_RPS4Y1	RPS10_RPS7
RPL35_RPS10	NCBP1_RPL17	RPS10_SRP14
EIF4G1_RPL17	RPL10A_RPS4Y1	RPS10_TRAM1
RPL17_RPS15	RPL8_RPS4Y1	RPS10_SECISBP2
EIF4A1_EIF4G1	RPS11_RPS4Y1	RPL11_RPS10
RPL17_RPLP2	RPL7A_RPS4Y1	EIF3K_EIF4A1
RPL17_SERBP1	DNAJC3_RPS4Y1	RPL37A_RPS10
BTF3_RPS10	RPS16_RPS4Y1	THOC1_ZC3H11A
RPS10_RPS13	DCP1A_RPS4Y1	RPL35A_RPS10
RPS10_RPS28	RPL18_RPS4Y1	RPL27_RPS10
RPL26_RPL41	RPS12_RPS4Y1	RPL38_RPS10
CLEC4A_IGSF6	RPS2_RPS4Y1	DCP1A_RPL17
RPL26_RPL35	RPL22_RPS4Y1	RPS10_SERBP1
FAU_RPL26	RPS3_RPS4Y1	DDOST_RPS10
FAU_RPL36A	EEF2_RPS4Y1	RPS10_SMG7
RPL17_UBA52	EEF1A1_RPS4Y1	RPL17_RPN1
FAU_RPL17	RPL13A_RPS4Y1	DDX47_UTP14A
CSNK1D_RPS10	RPS4Y1_RPS6	DCP1A_RPS10
HNRNPC_PCBP2	EIF4H_RPS4Y1	RPS10_RPS4X
RPL17_RPS28	RPL3_RPS4Y1	RPL27A_RPS10
RPL39_RPS10	RPL5_RPS4Y1	RPL14_RPS10
EIF3C_RPS10	RPL13_RPS4Y1	RPS10_RPS20
RPL17_RPL35	RPL4_RPS4Y1	RPL41_RPS10
RPL17_RPL41	RPLP0_RPS4Y1	RPL23_RPS10
RPL9_RPS10	EIF5B_RPS4Y1	RPL19_RPS10
RPL26_RPL9	RPL10_RPS4Y1	EIF4A3_RPL36A
RPL22_RPL36A	RPS4Y1_RPSA	RPS10_SMG5
EIF4A1_RPS2	RPL18A_RPS4Y1	CPSF7_ZC3H11A
PCBP1_YBX1	GABARAP_GABRA3	EIF4G1_RPS10
RPL36A_RPL39	RPL7_RPS4Y1	EIF2S1_EIF4A1
TREX1_XRCC5	EIF4G1_RPS4Y1	RPL31_RPS10
HSPA8_PCBP1	RPS4Y1_SPCS2	RPL36A_SEC61B
RPL26_RPS15	RPL15_RPS4Y1	RPS10_RPS11
PRPF8_SNRPN	RPL6_RPS4Y1	POM121_ZC3H11A
RPL17_RPL27	RPS4Y1_RPS8	RPL17_SSR2
DDX5_SNRPN	EIF3B_RPS4Y1	RPL36A_UPF2
RPL17_RPL39	EIF4A2_RPS4Y1	RPL17_RSL24D1
PCBP2_SNRPN	PPP2CA_RPS4Y1	RPS10_RPS18
PPP2R1A_RPS10	NUDT21_ZC3H11A	RPL17_SEC11C
EIF4A1_HSP90AB1	RPS4Y1_SECISBP2	RPL8_RPS10
EEF2_EIF4A1	RPS17_RPS4Y1	EEF1A1_RPS10
EIF4A1_RPS3	HLA-DRB5_LAT	RPS10_RPS14
RPL36A_RPL37A	EIF5_RPS4Y1	RPL13A_RPS10
RNPS1_RPS10	NDUFA13_NDUFS4	RPS10_RPS27A
EIF4A1_RPS9	ATP6V0C_MIOS	RPL7A_RPS10
NXF1_ZC3H11A	RNPS1_RPS4Y1	RPS10_RPSA
EIF4A1_EIF4G2	RIOK3_RPS4Y1	RPL35_RPS10
EIF5_RPS10	ERCC5_ERCC6	EEF2_RPS10
PPP2R1A_RPL17	RPP38_RPS4Y1	RPL3_RPS10
EIF3L_RPS10	PABPC4_RPS4Y1	RPL5_RPS10
RPL17_RPL38	RPS4Y1_TSR1	EIF4B_RPS10
EIF4A1_RPS16	RPS10_SEC61B	RPS10_RPS6
PABPC1_RPL36A	RPL23A_RPS4Y1	RPL4_RPS10
RPL34_RPL36A	RPS3A_RPS4Y1	RPLP2_RPS10
SF3B1_SNRPN	SYMPK_ZC3H11A	ILK_RUVBL2
TICAM2_UBC	CSTF3_ZC3H11A	RPL24_RPS10
EIF4A1_PTBP1	EIF2AK4_RPL36A	RPLP0_RPS10
RPL36A_UBA52	PABPN1_TARDBP	RPL10_RPS10
SNRPN_YBX1	RPS4Y1_SMG6	RPL34_RPS10
EIF4A1_RPS18	CTSD_HLA-DRB5	RPS10_RPS19
RPL26_RPL38	NCBP1_RPS10	RPL36A_SSR4
RPL35A_RPL36A	RPS4Y1_SRP9	RPL17_SMG7
EIF4A1_RPS25	CASC3_RPS4Y1	RBM8A_ZC3H11A
RPS10_SERBP1	DDX3Y_VPS35	RPL36A_SPCS1
SF3B2_SNRPN	EIF3L_RPS4Y1	RPLP1_RPS10
EIF4A1_EIF4H	ARPC1B_WAS	RPL17_RPL9
EIF4A1_PABPC1	ATP6V0C_SEC13	RPL18_RPS10
EIF4A1_RPS23	RBM8A_RPS4Y1	RPL36A_UPF3B
EIF4A1_RPS7	EIF4E_RPS4Y1	GSPT1_RPL17
HNRNPA2B1_SNRPN	MAFK_ZNF460	RPS10_RPS9
RPL36A_RPL38	GABARAP_STX17	RPL22_RPS10
HNRNPA1_SNRPN	CSNK1D_RPS4Y1	ATP6V0C_ATP6V1H
CASC3_ZC3H11A	BECN1_GABARAP	RPS10_RPS5
EIF4A1_RPS8	CASP10_EIF4A1	RPL17_RPS24
RPL36A_RPS11	EIF4A1_HERC5	RPS10_RPS28
EIF4A1_RPSA	ATP6V0A4_ATP6V0C	EEFSEC_RPS10
HNRNPK_SNRPN	RPL17_RPL26L1	RPS10_RPS3
RPL38_RPS10	ARPC1A_NCKAP1L	RPL7_RPS10
EEF1A1_RPL36A	POM121C_ZC3H11A	RPL17_RPS29
EIF4A1_RPS17	RPS4Y1_SMG1	RPS10_RPS27
RPL10_RPL36A	RPS15A_RPS4Y1	RPS10_RPS25
RPL36_RPL36A	RPS4Y1_RPS4Y2	RPL17_UBA52
RPL36A_RPL37	GSPT2_RPS10	EIF4A1_PSMC4
RPL36A_RPLP1	MAGOH_RPL36A	RPL10A_RPS10
RPL36A_RPS29	IMPACT_RPS10	SNRPD1_SNRPN
EEF1B2_EEF1G	EIF3M_RPS4Y1	RPL17_RPS26
EIF1_EIF4A1	EIF2S3_RPS10	BTF3_RPS10
RPL32_RPL36A	CNOT4_EIF4A1	TOMM40_TOMM6
RPL36A_RPS7	EIF4A3_RPS10	EIF3B_RPS10
RPL36A_RPS9	POLDIP3_ZC3H11A	RPL17_RPL32
EIF4A1_RPS3A	RPS10_RPS27L	RPL17_RPL21
EIF4A1_RPS15A	B3GNT3_PRELP	PABPC1_RPL17
PCBP1_XRCC6	SPTBN2_TMED7	RPS10_UPF1
RPL35_RPL36A	RPS10_SSR4	CKAP5_ILK
CASC3_RPL17	RPL10L_RPS10	RPL36A_RPS27L
EIF4A1_RPS12	GABARAP_GABRA5	EIF2S2_RPL36A
RPL36A_RPS13	RPS10_SRP72	RPS10_RPS17
EIF4A1_RPS27A	GABARAP_UBQLN1	RPL17_SMG6
HNRNPH1_SNRPN	HLA-DQB1_KLC1	RIOK3_RPS10
RPL36A_RPS5	RPS10_SPCS1	RPL17_TRAM1
RPS10_SRP14	RPL36A_RPS26P11	ETF1_RPS10
SNRPN_SRRM2	NXF2_ZC3H11A	RPS10_RPS21
EIF4A1_RPS6	ATP6V0C_CCDC115	ARPC1B_HIP1
LUC7L3_SNRPN	PAPOLA_ZC3H11A	ATP6V0C_RRAGA
RPL18A_RPL36A	ARPC1B_FCGR1A	PPP2R2A_RPL17
EIF4A1_EIF4A2	ATP6V0C_ATP6V1B1	EIF5B_RPS10
EIF4A1_RPL13A	ZNF410_ZNF460	RPL17_RPL37
EIF4A1_RPS14	CASC3_ZC3H11A	RPL15_RPS10
RPL36A_RPLP2	GPS2_TGS1	GABARAP_HSPA1B
RPL36A_RPS14	HLA-DQB2_LAT	RPL11_RPL17
RPL36A_RPS28	CHMP6_GABARAP	RPL17_RPS7
EIF4A1_RPS11	EIF2S3_RPL17	RPL17_RPS15
RPL30_RPL36A	RIOK1_RPS10	CAND1_SPSB3
RPL36A_RPS2	WDR33_ZC3H11A	TOMM6_TOMM7
SF1_SNRPN	HLA-DQB1_LAT	NDUFA13_NDUFAF2
CPSF7_ZC3H11A	SERPINA1_TRAPPC5	RPL12_RPL17
EIF4A1_RPS20	HLA-DQB2_KLC1	RPL7L1_RPS10
EIF4A1_RPS4X	EIF2S2_RPS10	ATP6V0C_ATP6V0D1
EIF4A1_RPS5	ATP6V0C_MTOR	BBS1_BBS9
RPL23A_RPL36A	ACAD11_ACADM	RPS10_SSR1
RPL36A_RPS15	RPL17_UPF3B	EIF4G1_RPL17
RPL36A_RPS15A	EIF3K_RPS10	NDUFA13_NDUFA6
TICAM2_UBA52	TOMM22_TOMM6	EIF4A2_RPS10
RPL36A_RPLP0	EIF3C_RPS4Y1	RPL17_RPS4X
RPL36A_RPS23	EIF4A1_PARN	RPS10_RPS12
EEF2_RPL36A	GSPT2_RPL17	RPL14_RPL17
EIF4A1_RPS19	ATP6V0C_SEH1L	RPL6_RPS10
EIF4A1_RPS24	RPL17_SRP72	RPL17_RPL37A
EIF4A1_RPS27	ATP6V0C_RRAGB	RPL17_RPL27A
HNRNPU_SNRPN	LAT_TYROBP	RPS10_RPS16
RPL10A_RPL36A	RPL17_UPF2	RPL17_RPL19
RPL24_RPL36A	RPS10_SRP68	RPL36A_SRP68
RPL36A_RPL7A	IMPACT_RPL17	COPS7A_SPSB3
RPL36A_RPL8	COL5A3_LAMB3	RPS10_RPS2
RPL36A_RPS27	RPS4Y1_UPF3A	RPL17_SEC61G
PAPOLA_ZC3H11A	FIP1L1_ZC3H11A	RPL17_RPS20
RPL27_RPL36A	EZH2_GPS2	RPL17_RPL23
RPL36A_RPS16	NDUFA1_NDUFA13	FANCA_TOP3B
RPL36A_RPS20	CDH11_CDH16	ATP6V1D_RNASEK
RPS10_RPS29	THOC2_ZC3H11A	EIF3H_EIF4A1
SNRNP70_SNRPN	RNPS1_ZC3H11A	RPL17_RPSA
TPR_ZC3H11A	COPS3_SPSB3	RPL17_RPS11
TREX1_XRCC6	COMMD1_SPSB3	RPL17_RPL35A
U2AF2_ZC3H11A	PCLO_VAMP2	EEF1A1_RPL17
LENG1_SNRPN	CNOT10_EIF4A1	PPP2R1A_RPS10
PCBP1_SF3B2	SRRM1_ZC3H11A	EIF3F_RPS10
RPL36A_RPS24	EIF2S1_RPS10	EIF3J_EIF4A1
HNRNPU_PCBP1	RPS10_UPF2	RPL13A_RPL17
POM121_ZC3H11A	KLC1_SPTBN2	ATP6V0C_KPTN
RPL12_RPL36A	COL9A3_ITGA2	COPS2_SPSB3
RPL17_UPF1	CHMP2B_GABARAP	EIF2S1_RPL36A
RPL31_RPL36A	DHX38_ZC3H11A	RPL17_SMG5
RPL21_RPL36A	GABARAP_YWHAZ	RPL17_RPS18
CASC3_RPS10	CSF2RA_SFTA3	EIF3E_EIF4A1
RPL14_RPL36A	RPS10_UPF3B	RPL17_SERBP1
RPL17_SRP14	FOSB_MAFG	RPL17_RPL3
RPL29_RPL36A	ATP6V0C_ATP6V1G1	EEF2_RPL17
RPL36A_RPS6	EGR2_POLR2F	RPL17_RPL27
EIF3A_EIF3C	GABARAP_SQSTM1	RPL17_RPL31
GABARAP_SQSTM1	LTV1_RPS4Y1	RPL17_RPS27A
HNRNPM_SNRPN	CSNK2B_TGFBR1	RPL17_RPL8
HSPA5_PCBP1	GABARAP_PDCD6IP	RPL17_RPL7A
RBM39_SNRPN	PCF11_ZC3H11A	ATP6V0C_ATP6V1F
RPL13_RPL36A	CD74_MIF	RPL17_RPL5
RPL36A_RPS17	RPS10_SRPRB	RPL17_RPS6
ACIN1_SNRPN	RPS10_ZC3H15	RPL17_RPL4
RPL26_RPL36	RPS4Y1_SRP19	EIF3I_EIF4A1
EIF3G_RPS10	CD163_HBA1	RPL13_RPS10
RNPS1_RPL17	GRSF1_RPS10	EIF3A_EIF4A1
RPL36A_RPL41	EIF4A3_RPL17	RPL10_RPL17
RPL36A_RPS8	GNA14_RGS5	RPL17_RPLP0
RPL36A_SERBP1	RPL36A_SRP54	RPS10_RPS8
RPS27A_TICAM2	BYSL_RPS10	RPL17_RPS14
HNRNPA3_SNRPN	ARPC1B_CD247	NDUFA13_NDUFA8
HNRNPC_PCBP1	RPS10_SSR2	RPL17_RPS17
HNRNPC_SNRPN	NXF1_ZC3H11A	ABI1_ARPC1B
HSPA8_SNRPN	RPL10L_RPL17	DDOST_RPL17
RPL17_RPL36	GABARAP_GABRA4	RPL17_RPL41
CASC3_SNRPN	RPP40_RPS10	ATP6V0C_ITFG2
EIF3F_RPS10	RPL17_SSR4	CWF19L2_SNRPN
RPL18_RPL36A	EIF3I_RPS10	NOB1_RPS10
RPL36A_RPL9	NDUFA13_NDUFS6	ATP6V0C_MLST8
RPS10_UPF1	RPL17_SPCS1	RPL36A_SRPRB
EIF4A1_RPS15	RPS10_RSL24D1	CHD9_GPS2
RPL15_RPL36A	EIF3J_RPS10	FOS_ILK
RPL17_RPS29	RPS10_SEC11C	RPL17_SRP14
RPL36A_RPS3A	RPL36_RPS10	RPL17_RPL36AL
NHEJ1_XRCC6	DDB2_ERCC5	EIF3D_EIF4A1
RPL36A_RPS25	ERCC6_GTF2H4	DDX47_WDR3
RPL23_RPL36A	ARPC1B_CD3G	RPL17_RPL35
RPL36A_RPL7	ACTG2_CDH3	RPL17_RPL24
RPL36A_RPS19	SPI1_SRCAP	GTPBP4_RPL36A
RPL36A_RPS21	RPL26L1_RPL36A	RPL17_RPLP2
RPL36A_RPS3	EIF4A1_FOS	RPL17_RPL34
RPL36A_RPSA	NCBP1_RPL36A	RPL17_RPS19
EIF4A1_RPS28	ARHGEF6_ILK	ATP6V0C_ATP6V0E1
PTBP1_SNRPN	EIF3H_RPS10	RPL17_RPLP1
RPL26_RPS29	ATP6V0C_ATP6V1E1	RPL17_RPL18
RPL27A_RPL36A	RPP21_RPS4Y1	EIF5B_RPL17
HSP90AA1_ILK	ITGA1_LAMB3	GRSF1_RPL36A
RPL28_RPL36A	U2AF2_ZC3H11A	RBBP8_RTEL1
RPL3_RPL36A	RPL39L_RPS10	COPS6_SPSB3
PSMD9_RPS27A	EIF2S2_RPL17	DNAJC3_RPS10
RANBP2_ZC3H11A	MAGOHB_RPS10	RPL17_RPL38
RNPS1_ZC3H11A	CASP6_EIF4A1	RPL17_RPL7
RPL13A_RPL36A	DDX3X_DDX3Y	GPS2_SUZ12
RPL17_SMG1	F11R_ITGB2	RPL17_RPL22
SRRM1_ZC3H11A	EIF3E_RPS10	EIF5_RPS10
DDX42_SNRPN	GABARAP_GABARAPL2	RPL17_RPS3
EIF3A_EIF4A1	CDH3_PSENEN	RPS10_TSR1
PNN_SNRPN	GALNT9_MUC21	EEFSEC_RPL17
RBMX_SNRPN	EIF2S3_EIF4A1	RPL17_RPS5
RPL19_RPL36A	ATP6V0C_ATP6V1G3	RPL17_RPS9
RPL36A_RPS4X	RPN2_RPS10	RPL17_RPS25
DDX3X_EIF4A1	LARP4_RPS10	EIF4A1_RPS26
RPL11_RPL36A	NDUFA13_NDUFS3	ATP6V0B_ATP6V0C
SYMPK_ZC3H11A	RPL17_SRP68	RPL17_RPS27
ARIH1_EIF4A1	CASP3_EIF4A1	RPL10A_RPL17
RPL36A_RPL4	COL10A1_LAMA2	RPS10_RPS13
RPN2_RPS10	COL27A1_ITGA2	NDUFA13_NDUFAF1
EIF3E_RPS10	RPL36AL_RPS10	NDUFA13_NDUFB3
EIF4A1_EIF4B	CASP2_EIF4A1	EIF4A1_RPS29
EIF4A1_PDCD4	EIF4A1_SRP72	RPL36_RPL36A
RPL36A_RPL5	EIF3D_RPS10	EIF4A1_PDCD4
RPL36A_RPS18	RPN1_RPS10	RPL15_RPL17
DDOST_RPS10	ARPC1A_FCGR3A	RPL29_RPS10
EIF4G1_RPL36A	CARD11_UBE2V1	GPS2_KDM1B
HNRNPUL1_SNRPN	MAFF_ZNF460	ATP6V0C_NPRL2
NDUFB8_NDUFB9	RPL17_SEC61B	CASC3_RPS10
ZNF527_ZNF709	CTSD_HLA-DQB1	EIF4A1_G3BP1
RBM25_SNRPN	CCDC22_SPSB3	RPL36A_RPN2
EIF4A1_EIF5	CASP5_EIF4A1	RPS10_SMG6
EIF4A1_RPS13	PSMA6_RUNX2	DDX47_WDR43
ILK_TNS1	CDH16_CDH4	RPL17_SMG1
RPL36_RPS10	GSK3B_ILK	RPL28_RPS10
RPL36A_RPL6	EIF3A_RPS10	RPL17_SEC11A
WDR33_ZC3H11A	RPP30_RPS10	RPL36A_SEC11C
EIF3A_RPS10	HSPA4_TXNDC5	RPL36A_RSL24D1
EIF4A1_FAU	DDX3Y_DDX53	SNRPN_WDR70
FUS_SNRPN	RPS10_RPS4Y2	RPL36A_SSR2
POLR2A_SNRPN	FLT4_ITGA2	EIF4A1_EIF4G3
RPL36A_RPS12	ATP6V0C_SESN2	PPP2CA_RPS10
RPS10_UPF3A	NSA2_RPS10	RPL17_RPL6
EIF3B_RPS10	RPS10_RPS29	SNRPG_SNRPN
HSPA8_TXNDC5	EIF2S1_RPL17	EIF4A1_GSPT1
RPS10_SMG1	DDX3Y_DDX4	FAU_RPS10
SF3A1_SNRPN	CPSF1_ZC3H11A	RPL17_UPF1
SIAH1_UBC	DDX6_EIF4A1	EIF4A1_RPS24
EIF4A1_TNKS1BP1	RGS1_RGS5	RPL17_RPS12
GABARAP_PDCD6IP	RGS17_RGS5	RPL17_SSR3
PPP2R1A_RPL36A	DDX3Y_PICALM	RPL39_RPS10
ATP6AP1_ATP6V0C	CCL17_CCL21	EIF4E_RPS10
CD74_MIF	EIF4A1_EIF4A3	RPL17_RPS16
CHMP4A_RPS27A	CNOT6_EIF4A1	GPS2_NCOA1
GNAI2_RGS5	RPS10_RPS26	EIF3G_RPS10
RBM5_SNRPN	RPL17_RPS27L	CNOT7_EIF4A1
RPL36A_RPS27A	ATP6V0C_RRAGD	EIF4A1_PABPC1
ARHGEF18_RAC1	ILK_PPP1R14B	RPL18A_RPS10
ARPC1B_CDC42	COPS4_SPSB3	ZNF337_ZNF430
CCT7_EEF1G	PNO1_RPS10	EIF4A1_RPS15
CHMP4B_GABARAP	NCAM1_SPTBN2	RPL17_RPS2
DDOST_RPL26	BCL2_RXRG	NICN1_TTLL1
EIF3D_RPS10	GRSF1_RPL17	RPL36A_RPN1
HNRNPK_POLR2F	NR4A1_RXRG	EIF4A1_RPS7
ILK_ITGB1	EEF1D_EEF1G	RPL17_RPS28
RPL36A_SRP14	ITGA7_LAMB3	ATP6V0C_SH3BP4
DDOST_RPL17	EIF4A1_EIF4E3	DDX47_UTP18
DHX38_SNRPN	MAGOHB_RPL17	CDK5RAP3_DDRGK1
AKT1_ILK	RPL17_SRPRB	ATP6V0C_SESN1
EIF2S3_RPL36A	ACAD9_NDUFA13	SNRPD1_U2AF1
EIF3G_EIF4A1	ATP6V0C_ATP6V1C1	NDUFA12_NDUFA13
LSM6_SNRPN	PPP2R2A_RPS10	BCL9_SRCAP
RPL17_SEC11A	RPL17_RPL36	PLRG1_SNRPN
SNRPN_SRRM1	RPS10_SEC11A	NDUFA13_NDUFA3
SNRPN_ZMAT5	RPL17_RPN2	NDUFA13_NDUFAB1
CSNK2B_DVL3	ILK_PARVG	GABARAP_GABARAPL1
EIF3B_EIF4A1	CPSF6_ZC3H11A	ATP6V0C_WDR59
GGA2_RABGEF1	ATP6V0C_RHEB	RNPS1_RPS10
POLR2F_SF3B2	DDX3Y_RPS3A	DIS3L2_EIF4A1
RPL17_SMG5	RPS10_SSR3	DDX47_UTP20
RPL7L1_RPS10	RPS10_SEC61G	IPO4_NUP155
SNRPN_SRRT	EIF4A1_PAIP1	EIF4A1_RPS4X
ZNF557_ZNF709	ACTBL2_ARPC1B	ARL13B_UBE2V1
DHX9_PCBP1	ARPC1A_CD3D	ELF1_GPS2
EIF4A1_PAN2	CDK7_ERCC5	CUL5_SPSB3
POLR2F_UBA52	IRF4_SRCAP	CPSF3_SNRPN
RPL17_RPN1	IMPACT_RPL36A	EIF4A1_EIF4G1
ZNF625_ZNF813	RPL9_RPS10	ILK_RUVBL1
CASC3_POLR2F	ILK_PARP1	NCBP2_RPL17
CTNNB1_ILK	CNOT6L_EIF4A1	RPL17_SSR1
EEF1G_SNW1	ITGA10_LAMB3	EIF4A1_RPS20
EIF3L_EIF4A1	RPS10_UBA52	ARPC1B_GAB1
GNB1_GNG10	ATP6AP1_ATP6V0C	BBS1_SSTR3
HSP90AA1_TTC4	EIF2S3_RPL36A	RPS10_RPS3A
NDUFB7_NDUFB8	GSPT1_RPS10	CSNK1D_RPS10
RNPS1_RPL36A	CASK_VAMP2	DDX3X_EIF4A1
RPL17_RPN2	GPS2_NCOA2	EIF3L_RPS10
RPN1_RPS10	RPS10_RPS24	EIF4A1_HSP90AB1
RPS10_SSR2	F5_MMRN1	EIF4A1_EIF4G2
CASC3_RPL36A	RPL37_RPS10	EIF4A1_RPS11
EIF4G1_RBM4	RNF7_SPSB3	EIF4A1_RPSA
ERCC5_UBC	EIF2S2_EIF4A1	PPP2R1A_RPL17
NHEJ1_XRCC5	GSPT2_RPL36A	ACTN1_ILK
PABPC1_RBM4	RAB1B_SPTBN2	EIF4A1_RPL13A
PNN_POLR2F	RPS10_RPS15	RPL17_RPS8
POLR2F_SF3B3	ILK_TACC3	EIF4A1_RPS18
PSMD9_SKP1	RPL21_RPS10	ATP6V0C_TCIRG1
UBC_UBE2V1	ITGA8_LAMB3	KRI1_RPS10
ZNF410_ZNF813	ITGA2_LAMA2	ACTR3B_ARPC1B
ZNF552_ZNF709	NCBP2_RPS10	RPL13_RPL17
ZNF616_ZNF709	RPL32_RPS10	EIF4A1_RPS27A
EIF2S3_RPS10	RPL36A_SRP72	RPS10_SMG1
EIF3M_RPS10	ATP6V0A1_ATP6V0C	EEF2_EIF4A1
EIF4A1_RPS29	RPL17_SECISBP2	RPL36A_RPS26
ERCC5_RPS27A	GPS2_KDM4A	EIF4A1_RPS6
HNRNPD_SNRPN	ARHGAP24_DDX3Y	ARPC1B_ITSN1
IK_SNRPN	RPL17_RPS4Y2	EIF4A1_RPS14
KDM2A_SRCAP	CNOT2_EIF4A1	RAD50_RBBP8
MRPS2_MRPS24	RPL12_RPS10	RPL23A_RPS10
PSMD2_PSMD9	PABPC1_RPS10	NUP155_U2AF1
RBM8A_RPS10	COL11A1_LAMA2	RPL36A_RPS29
RPL17_SRP68	RPS10_RPS7	EIF4A1_EIF4B
SNRPN_WDR83	RPS10_SRP14	DNAJC3_RPL17
ZNF665_ZNF709	RPS10_TRAM1	NDUFA13_NDUFS1
ADORA2A_GNAS	RPS10_SECISBP2	ATP6V0C_WDR24
ARHGEF18_UBA52	RPL11_RPS10	DCP1A_RPL36A
CSNK2B_FKBP1A	GABRB2_GABRB3	EIF4A1_EIF4E2
DDOST_RPL36A	EIF3K_EIF4A1	RPL36A_SECISBP2
EIF5B_RPS10	RPL37A_RPS10	EIF4H_RPS10
HNRNPL_POLR2F	GABARAP_GABRA2	EIF4A1_RPS17
NDUFA9_STOML2	THOC1_ZC3H11A	ETF1_RPL17
PSMA6_PSMC6	RPL35A_RPS10	DDX47_ESF1
PSMD13_PSMD9	RPL27_RPS10	GPS2_PPARA
RBBP4_SRCAP	RPL38_RPS10	ZNF410_ZNF93
RPL17_RPL7L1	CTSD_HLA-DQB2	RPL36A_RPL9
RPL17_SMG7	DCP1A_RPL17	RPL36A_RPL36AL
RPL36A_UPF1	CDK5RAP3_CTCF	GSPT1_RPL36A
RPS27A_UBE2V1	COL11A2_LAMB3	CDK7_GTF2H4
SNRNP200_SNRPN	RPS10_SERBP1	PPP2R2A_RPL36A
DCTN2_RAB1B	DDOST_RPS10	EIF4A1_RPS19
DDB1_POLR2F	RPS10_SMG7	ATG4B_GABARAP
GABARAP_UVRAG	RPL17_RPN1	RPL36A_UBA52
HNRNPF_PCBP1	DDX47_UTP14A	CASC3_RPL17
HNRNPK_RBM4	ACTA1_CDH3	ELP3_SRCAP
HNRNPM_RBM4	DCP1A_RPS10	RPL36A_RPS24
IK_PCBP1	RPS10_RPS4X	ATP6V0C_NPRL3
NUP98_ZC3H11A	RPL27A_RPS10	RPL36A_SMG7
RPL17_RPS21	RPL14_RPS10	LRRC49_NICN1
SIAH1_UBA52	RPS10_RPS20	RPL36A_SEC61G
ACIN1_POLR2F	RPL41_RPS10	EIF4A1_RPS5
ALDH3A2_GET4	RPL23_RPS10	RPL21_RPL36A
CPSF7_SNRPN	MUC21_ST6GALNAC2	RPL36A_TRAM1
CSNK2B_ENG	RPL19_RPS10	RPL32_RPL36A
DDB1_ERCC5	EIF4A3_RPL36A	ARL6IP4_CPSF6
GPS2_RXRB	RPS10_SMG5	EIF4A1_RPS25
NDUFB8_UQCRC1	CPSF7_ZC3H11A	EIF4A1_RPS3
PAPOLA_SNRPN	EIF4G1_RPS10	RPL36A_RPL37
RPL26_RPN2	EIF2S1_EIF4A1	PABPC1_RPL36A
RPS10_RPS21	RPL31_RPS10	EIF4A1_RPS9
RPS10_SEC11A	RPL36A_SEC61B	NDUFA13_NDUFB1
THOC2_ZC3H11A	RPS10_RPS11	PPIL3_SNRPN
UQCR11_UQCRQ	POM121_ZC3H11A	CSTF2_SNRPN
ZNF30_ZNF709	RPL17_SSR2	RPL36A_RPS15
ARPC1A_CLTA	RPL36A_UPF2	EIF4A1_RPS27
ATG7_GABARAP	RPL17_RSL24D1	RPL36A_RPS7
CCNK_SUPT6H	RPS10_RPS18	SNRPF_SNRPN
COPZ1_RAB1B	RPL17_SEC11C	RPL12_RPL36A
CSTF1_SNRPN	RPL8_RPS10	RPL11_RPL36A
DDX42_POLR2F	EEF1A1_RPS10	EIF3B_EIF4A1
EIF3E_EIF4A1	RPS10_RPS14	SLU7_SNRPN
EIF3F_EIF4A1	RPL13A_RPS10	GPS2_NCOR1
ERGIC3_TRAPPC5	RPS10_RPS27A	RPL36A_RPL37A
FBXO7_SIAH1	ZNF460_ZNF587	GPS2_TBL1X
FLT3LG_UBC	RPL7A_RPS10	EIF4A1_RPS6KB1
HSPG2_NDST2	RPS10_RPSA	ATG4D_GABARAP
MRPS22_MRPS24	RPL35_RPS10	RPL36A_RPS4X
PRPF4B_SNRPN	EEF2_RPS10	RPL17_RPL7L1
RPL36A_SMG5	RPL3_RPS10	RPL27A_RPL36A
ACTB_POLR2F	RPL5_RPS10	ILK_ITGAV
APOBEC3D_APOBEC3F	EIF4B_RPS10	RPL14_RPL36A
ARPC1B_ARPC3	RPL10L_RPL36A	EIF4G1_RPL36A
COPS7B_SPSB3	RPS10_RPS6	ERCC6_POLR2F
EEFSEC_RPL17	RPL4_RPS10	RPL36A_SERBP1
EIF3H_RPS10	RPLP2_RPS10	RPL35A_RPL36A
EIF4A1_G3BP1	ILK_RUVBL2	RPL19_RPL36A
GET4_PRNP	APC_CSNK1E	EIF4A1_EIF4A2
HNRNPH1_POLR2F	RPL24_RPS10	RPL36A_RPS20
KRR1_RPS10	BET1L_SPTBN2	RPL23_RPL36A
MYO1C_POLR2F	RPLP0_RPS10	PDIA4_TXNDC5
PCF11_ZC3H11A	RPL10_RPS10	RPL27_RPL36A
POLR2F_SF1	RPL34_RPS10	EIF4A1_RPS28
POLR2F_SRRM2	RPS10_RPS19	NDUFA13_NDUFS5
PSMA6_PSMF1	GET4_HMOX1	RPL36A_RPS11
RAD21_TREX1	RPL36A_SSR4	GPS2_NCOA6
RPL26_RPN1	RPL17_SMG7	ATP6V1B2_RNASEK
SMARCC2_SRCAP	RBM8A_ZC3H11A	APC_PSMA6
SNRPN_WDR33	RPL36A_SPCS1	RPS10_SPCS2
SRRM1_U2AF1	RPLP1_RPS10	SNRPG_U2AF1
ARPC1B_WASF2	RPL17_RPL9	RPL36A_SRP14
ATRIP_DBF4	RPL18_RPS10	RPL36A_RPSA
CHMP2A_GABARAP	RPL36A_UPF3B	EEF1A1_RPL36A
CHMP4A_UBA52	GSPT1_RPL17	BBS1_TTC8
DDX47_RPS7	RPS10_RPS9	DDOST_RPL36A
EIF2S3_EIF3C	RPL22_RPS10	EIF4A1_RPS12
EIF2S3_RPL17	ATP6V0C_ATP6V1H	RPL13A_RPL36A
EIF3CL_RPS20	RPS10_RPS5	RPL36A_SMG5
EIF3CL_RPS5	RPL17_RPS24	DDX47_WDR36
GPATCH1_SNRPN	RPS10_RPS28	RPL36A_RPS18
GRSF1_RPS10	EEFSEC_RPS10	RPL31_RPL36A
GTF2E1_ZBTB9	RPS10_RPS3	ERCC5_PCNA
HNRNPA2B1_POLR2F	RPL7_RPS10	EIF4A1_RPS16
HNRNPUL1_POLR2F	RPL17_RPS29	RPL36A_RPL8
ILK_RAF1	RPS10_RPS27	RPL36A_SEC11A
INTS10_POLR2F	RPS10_RPS25	RPL36A_RPS27A
MRPL53_OXA1L	RPL17_UBA52	EIF4A1_TNKS1BP1
POLR2F_RBM39	ZNF337_ZNF460	RPL3_RPL36A
POLR2F_RPS27A	ARPC4_NCKAP1L	EEF2_RPL36A
POLR2F_UBC	RPL17_RPL39L	RPL36A_RPL7A
RAB5B_RABGEF1	EIF4A1_PSMC4	RPL36A_RPL5
RBM8A_RPL36A	CDH16_FAT2	RPL36A_RPL41
RPL36A_RPN2	RPL10A_RPS10	GPS2_KDM1A
RPL36A_UPF3A	SNRPD1_SNRPN	RPL36A_RPS6
RPS10_SECISBP2	RPL17_RPS26	RPL36A_RPL4
RPS10_SMG5	BTF3_RPS10	ARPC1B_ARPC5L
RPS10_SRP9	RGS16_RGS5	ACTR3_ARPC1B
SF3B3_SNRPN	CYSLTR2_EDN3	RPL36A_RPS14
UBA52_UBE2V1	NDST2_SDC1	RPL36A_SSR3
ZBTB24_ZBTB9	TOMM40_TOMM6	EIF4A1_RPS2
ZNF410_ZNF658	EIF3B_RPS10	NDUFS4_NDUFV2
ZNF570_ZNF709	AURKA_ILK	PPIH_SNRPN
ZNF620_ZNF709	RPL17_RPL32	EIF3F_EIF4A1
CSNK2A1_CSNK2B	RPL17_RPL21	RPL36A_RPLP0
FUS_POLR2F	PABPC1_RPL17	RPL10_RPL36A
GDI1_RABGEF1	RPS10_UPF1	RPL36A_RPL38
HNRNPF_RBM4	CKAP5_ILK	EIF3M_RPS10
HNRNPH1_RBM4	RPL36A_RPS27L	HSPA8_TXNDC5
HSP90AA1_TXNDC5	EIF2S2_RPL36A	COPS8_SPSB3
IKBKB_UBE2V1	RPS10_RPS17	RPL35_RPL36A
ILK_IQGAP1	CHRDL1_FAM20A	RPL36A_SMG6
MRPS24_MRPS27	RPL17_SMG6	RPL36A_RPLP2
NKAP_SNRPN	RIOK3_RPS10	RPL24_RPL36A
PCBP2_POLR2F	RPL17_TRAM1	RPS10_SRP9
POLR2F_SNRPD3	ETF1_RPS10	ILK_LIMS1
POLR2F_UBTF	RPS10_RPS21	HSP90AA1_TXNDC5
POM121C_ZC3H11A	ARPC1B_HIP1	ARPC1B_HTT
RBM39_U2AF1	ATP6V0C_RRAGA	ARPC1B_WIPF1
RBM4_RPL5	PPP2R2A_RPL17	RPL34_RPL36A
RBM8A_RPL17	EIF5B_RPS10	RPL36A_RPS19
RNF113A_SNRPN	RPL17_RPL37	RPL36A_RPS17
RPL36A_RPN1	RPL15_RPS10	ARIH1_EIF4A1
RPP30_RPS10	GABARAP_HSPA1B	ARPC1B_CYFIP1
SNRPN_ZNF830	RPL11_RPL17	RPL17_RPL28
ZFP82_ZNF709	RPL17_RPS7	RPL17_RPL39
ZNF557_ZNF625	RPL17_RPS15	RPL36A_RPLP1
ACTG1_ARPC1B	CAND1_SPSB3	RPL18_RPL36A
APEX1_PRMT5	TOMM6_TOMM7	ILK_PARVA
ARHGEF7_ILK	NDUFA13_NDUFAF2	EIF5B_RPL36A
CHMP4A_CHMP4B	RPL12_RPL17	RPL22_RPL36A
CHMP4A_HSPA8	PSMA6_TNFRSF12A	DDX47_UTP3
CTNNB1_SRCAP	RPL7L1_RPS10	EIF4A1_RPS8
DDB1_GTF2H4	ATP6V0C_ATP6V0D1	PLRG1_U2AF1
DHX9_SNRPN	BBS1_BBS9	MFAP1_SNRPN
DIAPH1_MEMO1	KIT_PIK3R3	RPL17_RPL23A
EEFSEC_RPL36A	RPS10_SSR1	CTNNBL1_SNRPN
EFTUD2_POLR2F	EIF4G1_RPL17	GNAI2_RGS5
EIF3B_EIF3CL	NDUFA13_NDUFA6	EEFSEC_RPL36A
EMG1_NCL	EIF4A2_RPS10	PPP2CA_RPL17
HNRNPUL1_RBM4	ACTC1_CDH3	RPL36A_RPL7
ILK_MYL9	CCL18_GNG10	ARPC1B_BAIAP2
ILK_XPO1	RPL17_RPS4X	RPL36A_RPS5
INTS1_POLR2F	COL4A3_LAMB3	RPL36A_RPS9
MORF4L1_SRCAP	RPS10_RPS12	DDX47_EXOSC1
NDUFB8_NDUFS3	RPL14_RPL17	NCBP2_RPL36A
NXF1_SARNP	RPL6_RPS10	RPL36A_RPS3
POLDIP3_ZC3H11A	RPL17_RPL37A	EIF4A1_EIF4E
POLR2F_POLR3G	RPL17_RPL27A	RPL17_RPS13
POLR2F_RBBP7	RPS10_RPS16	ZNF100_ZNF410
POLR2F_SSRP1	RPL17_RPL19	ILK_IQGAP1
POLR2I_POLR2J	RPL36A_SRP68	RPL36A_RPS25
PPP2CA_RPS10	COPS7A_SPSB3	HSP90AB1_TXNDC5
PSMA6_UBC	RPS10_RPS2	RPS10_UPF3A
RPL17_SSR1	ZNF410_ZNF486	RPL17_RPL29
RPS10_SMG7	RPL17_SEC61G	NDUFA13_NDUFC1
SARNP_TPR	RPL17_RPS20	ACTR2_ARPC1B
ZNF28_ZNF564	RPL17_RPL23	ARPC1B_ARPC3
ZNF526_ZNF709	ITGA5_LAMB3	RPL36A_RPS27
ZNF619_ZNF709	FANCA_TOP3B	RPL10A_RPL36A
ANAPC5_PSMD9	ATP6V1D_RNASEK	SRPK2_U2AF1
ARHGEF18_RHOA	EIF3H_EIF4A1	MYD88_UBE2V1
ARPC1B_CAPZB	COL8A2_LAMA2	CCL14_SMARCA4
ATP6V0C_ATP6V1E1	RPL17_RPSA	CPSF3_U2AF1
ATP6V0C_SEC13	ILK_RHOG	GPKOW_SNRPN
ATRIP_FANCI	RPL17_RPS11	RPL17_RPL18A
BUD13_SNRPN	RPL17_RPL35A	MAGOH_SNRPN
COX5B_UQCR11	EEF1A1_RPL17	RPL15_RPL36A
DDX5_POLR2F	PPP2R1A_RPS10	EIF1AX_RPS10
DDX5_RBM4	EIF3F_RPS10	ABCE1_EIF4A1
EEFSEC_RPS10	EIF3J_EIF4A1	SNRNP40_SNRPN
EIF1AX_EIF4A1	RPL13A_RPL17	SNRPD3_SNRPN
EIF3CL_EIF3L	ATP6V0C_KPTN	PPIL4_SNRPN
EIF3D_EIF4A1	APOL1_HBA1	FAU_RPL17
EIF3I_RPS10	COPS2_SPSB3	EIF4A1_EIF5
EIF4A1_RPS21	EIF2S1_RPL36A	ARPC1B_VCL
ELP2_SRCAP	RPL17_SMG5	RPL36A_UPF1
GPS2_RBBP4	RPL17_RPS18	RPL17_RPS3A
GRSF1_RPL36A	EIF3E_EIF4A1	RPL36A_RPS28
HNRNPR_SNRPN	RPL17_SERBP1	NDUFA13_NDUFS2
HSPA8_TTC4	RPL17_RPL3	SF3A3_SNRPN
IK_POLR2F	EEF2_RPL17	NDUFA13_NDUFB5
ILK_RAC1	ZBTB7B_ZNF460	RNPS1_RPL17
MRPL53_TUFM	HIF3A_PSMB9	ELMO2_ILK
NDUFA13_NDUFV1	EEA1_RAB5C	NDUFA13_NDUFB7
NDUFB8_NDUFS5	RPL17_RPL27	RPL36A_RPL6
PNN_U2AF1	HLA-DQA2_RILP	SLU7_U2AF1
POLR2F_SF3B1	RPL17_RPL31	RPL36A_RPS12
PPAN_RPS6	RPL17_RPS27A	RPL36A_RPS16
PPAN_WDR74	RPL17_RPL8	CARM1_GPS2
PPP2CA_RPL17	RPL17_RPL7A	EIF4A1_RPS21
PSMA6_PSMA7	ATP6V0C_ATP6V1F	RPL36A_RPS2
PSMA6_PSME3	RPL17_RPL5	ILK_ILKAP
PSMA6_RAD23A	RPL17_RPS6	RPL30_RPS10
RAD50_XRCC5	RPL17_RPL4	NUP155_SARNP
RBM10_SNRPN	RPL3L_RPS10	CRNKL1_SNRPN
RPL17_RPL36AL	ZNF320_ZNF460	CDC5L_SNRPN
RPL36A_SSR2	EIF3I_EIF4A1	RPL36A_SSR1
RPS10_SRP68	ATP6V0C_ATP6V1E2	RPL17_RPS21
RPS10_SRP72	RPL13_RPS10	DCUN1D1_SPSB3
SNRPD3_SNRPN	EIF3A_EIF4A1	CREBBP_GPS2
SNRPN_TRA2B	RPL10_RPL17	ARPC1B_ARPC2
SRCAP_STAT3	RPL17_RPLP0	ETF1_RPL36A
ZNF586_ZNF709	RPS10_RPS8	PPIL3_U2AF1
AP2A1_ARPC1B	RPL17_RPS14	ATP6V0C_FLCN
ARPC1A_EPN1	NDUFA13_NDUFA8	ZNF410_ZNF526
ARPC1B_MYO1C	RPL17_RPS17	PPP2R1A_RPL36A
ATP6V0C_TMEM199	ABI1_ARPC1B	EIF4A1_PTBP1
CHMP4A_UBC	CDH16_PCDH7	TOMM20_TOMM6
COPS5_SPSB3	DDOST_RPL17	ERCC5_GTF2H5
CPSF6_ZC3H11A	RPL17_RPL41	DDX47_DDX52
CSNK2B_NFE2L2	ATP6V0C_ITFG2	SNRPF_U2AF1
DDOST_KRTCAP2	CWF19L2_SNRPN	NDUFA13_NDUFB10
DDX17_RBM4	NOB1_RPS10	NDUFA1_NDUFV2
DDX47_RPS5	CD79A_SH3BP5	DDX47_PDCD11
DDX5_U2AF1	ATP6V0C_MLST8	RBMX2_SNRPN
EIF3CL_EIF3K	RPL36A_SRPRB	RPL13_RPL36A
EIF3CL_EIF5B	CHD9_GPS2	RPL36A_RPS8
EIF3CL_RPS3	FOS_ILK	CTNNB1_ILK
EIF3I_EIF4A1	RPL17_SRP14	DNAJC3_RPL36A
EIF5B_RPL17	RPL17_RPL36AL	EIF4A1_RPS13
ERCC5_UBA52	LRP4_PSENEN	EIF3L_EIF4A1
FLT3LG_RPS27A	EIF3D_EIF4A1	EIF4A1_PABPC4
GABARAP_GABARAPL2	DDX47_WDR3	POLR2J_SNRPN
GNAI2_GNG10	RPL17_RPL35	PELI1_UBE2V1
GPS2_RBBP7	RPL17_RPL24	COQ10B_NDUFA13
GPS2_TRIM28	GTPBP4_RPL36A	CSNK2B_GSK3B
GTF2H4_POLR2A	RPL17_RPLP2	GABARAP_ULK1
GTF2H4_RTF1	RPL17_RPL34	RPL17_SPCS2
GTF2H4_SUPT5H	RPL17_RPS19	GPS2_RBBP7
GTF2H4_TAF1	ATP6V0C_ATP6V0E1	DDX47_XRN2
GTF2H4_UBC	RPL17_RPLP1	SMC3_TOP3B
HNRNPA2B1_U2AF1	RPL17_RPL18	NDUFA13_NDUFAF4
HNRNPL_RBM4	EIF5B_RPL17	NDUFB8_NDUFS4
HNRNPM_POLR2F	GRSF1_RPL36A	THOC5_U2AF1
HSPA8_POLR2F	RBBP8_RTEL1	CSNK2B_TP53
MBD3_MCRS1	CCL13_CCL21	EIF4A1_FAU
MRPL33_MRPS24	COPS6_SPSB3	BMS1_DDX47
MRPL53_MRPS27	GNAQ_RGS5	RPL17_UPF3A
MRPS24_MRPS7	ARPC1A_FCGR2A	DDX47_RRP9
NDUFV2_SDHB	DNAJC3_RPS10	BCAS2_SNRPN
PDS5A_RAD50	RPL17_RPL38	EIF4A1_PAN3
POLR2F_PRPF8	RPL17_RPL7	RPL36A_SMG1
POLR2F_PTBP1	GPS2_SUZ12	EIF2S3_EIF3CL
PPIL2_SNRPN	RPL17_RPL22	RBM8A_RPS10
PSMA6_UBA52	ALMS1_CSNK1E	ERCC5_PARP1
PSMD4_PSMD9	TLR7_UBE2V1	ERCC5_RFC2
PSMD9_PSMF1	LAMB3_MMP19	ERCC5_POLR2J
RPL17_RPL26L1	CDH13_CDH16	CWC27_SNRPN
RPL17_UPF3A	B3GNT3_OGN	HSP90AA1_ILK
SARNP_SYMPK	EIF5_RPS10	CASC3_RPL36A
SEC13_ZC3H11A	RPL17_RPS3	RPL36A_RPS21
SNRPN_WBP4	RPS10_TSR1	GPS2_NCOR2
ZNF410_ZNF530	EEFSEC_RPL17	PPP1R8_SNRPN
ZNF555_ZNF709	ACTN2_LAMB3	SNRPD3_U2AF1
ZNF564_ZNF701	RPL17_RPS5	MRPL14_MRPL38
ZNF624_ZNF709	RPL17_RPS9	EIF4A1_RPS3A
ZNF709_ZNF813	RPL17_RPS25	DDX47_DDX49
ADSL_ATIC	EIF4A1_RPS26	CTNNBL1_U2AF1
ARPC1B_ARPC2	ATP6V0B_ATP6V0C	DDX47_MPHOSPH6
CCNH_ERCC5	RPL17_RPS27	ARPC1B_CDC42
CCNK_SMAD2	CASP7_EIF4A1	EIF3G_EIF4A1
CHD3_SRCAP	RPL10A_RPL17	ILK_NACA
CHMP4A_PPIA	RPS10_RPS13	SMU1_SNRPN
CNOT3_EIF4A1	NDUFA13_NDUFAF1	PCNT_UBE2V1
COX6A1_COX6B1	NDUFA13_NDUFB3	GPS2_RBBP4
CUL4A_ERCC5	EIF4A1_RPS29	SNRNP40_U2AF1
DCP1A_RPL17	MMP7_TCF7L1	DDX47_WDR46
DCP1A_RPS10	MAGOHB_RPL36A	DDX47_NIP7
EBNA1BP2_SENP3	COL11A1_PCOLCE2	DDX47_EXOSC5
EIF4A1_PABPC4	RPL36_RPL36A	MAGOH_U2AF1
EMG1_NIP7	EIF4A1_PDCD4	CSTF2T_U2AF1
EMG1_UTP3	RPL15_RPL17	RPL36A_RPS13
EP300_GTF2I	RPL29_RPS10	RPL28_RPL36A
ERAL1_MRPS24	GPS2_KDM1B	RPL36A_RPL39
FLT3LG_UBA52	ATP6V0C_NPRL2	CREB1_ILK
GPS2_HDAC3	CASC3_RPS10	RPL29_RPL36A
HLA-E_LAT	EIF4A1_G3BP1	CDC5L_U2AF1
HNRNPA3_U2AF1	RPL36A_RPN2	GPKOW_U2AF1
JUND_ZNF593	RPS10_SMG6	PPP2CA_RPL36A
MRPS24_MTIF3	DDX47_WDR43	ELP2_SRCAP
NDUFS3_NDUFS7	RPL17_SMG1	ZNF410_ZNF658
NPM1_RAD50	RPL28_RPS10	BUD13_SNRPN
NUP37_ZC3H11A	ARHGAP20_ARHGAP36	ARPC1B_NCKAP1
POLR2A_U2AF1	RPL17_SEC11A	ARPC1B_WIPF2
PPP2CA_RPL36A	BTK_S100A1	DNAJC3_TXNDC5
PQBP1_SNRPN	COG6_STX16	CWC15_SNRPN
PRMT5_SNRPD3	RPL36A_SEC11C	BBS1_RAB3IP
PSMA6_PSMD11	RPL36A_RSL24D1	MSH2_RAD50
PSMD9_UBC	SNRPN_WDR70	BBS1_BBS7
RABEP1_RABGEF1	ZNF444_ZNF676	EIF1_EIF4A1
RAD50_TOP2B	ITGA2B_LAMB3	ILK_XPO1
RAE1_ZC3H11A	RPL36A_SSR2	CRNKL1_U2AF1
RAN_RANGRF	EIF4A1_EIF4G3	EIF2S2_EIF3CL
RBM25_U2AF1	DDB2_GTF2H4	CHUK_UBE2V1
SNRNP27_SNRPN	NRXN1_SYT12	ARL6IP4_ZRANB2
SNRPA1_U2AF1	BTG4_EIF4A1	FAU_RPL36A
SNRPG_SNRPN	PPP2CA_RPS10	TAB2_UBE2V1
SNRPN_SNW1	RPL17_RPL6	RBMX2_U2AF1
ZNF35_ZNF410	SNRPG_SNRPN	ILK_ITGB1
ZNF410_ZNF585A	EIF4A1_GSPT1	ARPC1B_GRB2
ZNF410_ZNF664	ARPC1B_MYH2	DCAF13_DDX47
ZNF709_ZNF79	CDH19_CDH3	CSNK2B_NCAPD2
ACAD9_NDUFB8	FAU_RPS10	GTF2B_GTF2H4
ACIN1_U2AF1	RPL17_UPF1	SF3A3_U2AF1
ACTB_INO80B	ILK_PPP1R14C	RPL18A_RPL36A
ARL6IP4_ZRANB2	EIF4A1_RPS24	PRPF19_SNRPN
ARRDC3_RABGEF1	RPL17_RPS12	EIF3CL_EIF3K
ATP6V0C_ATP6V1F	RPL17_SSR3	DAXX_GPS2
ATP6V0C_RHEB	COL11A1_PCOLCE	NDUFS6_NDUFV2
CCNH_CCNK	RPL39_RPS10	EIF4A1_EIF4H
CCNK_CHD2	ZNF444_ZNF737	ARPC1B_MYO1C
CDC40_SNRPN	EIF4E_RPS10	RPL23A_RPL36A
CDK9_GTF2H4	RPL17_RPS16	FOXK1_GPS2
CHMP4A_PDCD6IP	DYNLL2_HLA-DQA2	CPSF3_SARNP
COPS7B_GTF2H4	GPS2_NCOA1	RPS10_RPS23
CSNK2B_DVL1	EIF3G_RPS10	NOP10_RTEL1
CTNNB1_TAX1BP3	NELL2_ROBO3	LTV1_RPS10
DCAF13_EMG1	CEBPA_ITGA2	RPL17_SRP9
DCP1A_RPL36A	CNOT7_EIF4A1	ATG12_GABARAP
DDX42_U2AF1	COL9A2_LAMB3	SNRPN_SYF2
DDX47_RPS9	EIF4A1_PABPC1	EIF3M_EIF4A1
DHX38_ZC3H11A	NOD1_UBE2V1	DHX8_SNRPN
EIF3H_EIF4A1	RPL18A_RPS10	MRPL38_MRPL47
EIF3K_RPS10	COL4A5_LAMB3	BBS1_CCT2
EIF5B_RPL36A	ZNF337_ZNF430	PRPF6_SNRPN
ERCC4_POLR2F	EIF4A1_RPS15	ACTG1_ARPC1B
ERCC5_RFC5	RPL17_RPS2	ARPC1B_WASL
EYA3_RAD50	FLG_PRSS8	DDX47_FCF1
GET4_VAPA	NICN1_TTLL1	RNPS1_RPL36A
GTF2H4_POLR2K	RPL36A_RPN1	EIF1AX_RPL17
GTF2H4_SSRP1	EIF4A1_RPS7	DDX47_UTP6
HEXA_HEXB	RPL17_RPS28	ACTB_ARPC1B
HIF1A_PSMA6	ATP6V0C_SH3BP4	RPL36A_RPS3A
HNRNPA1_POLR2F	DDX47_UTP18	KRR1_RPS10
HNRNPC_POLR2F	CDK5RAP3_DDRGK1	ACTR8_SRCAP
HNRNPD_POLR2F	ATP6V0C_SESN1	DDX47_RCL1
HNRNPD_PSMD9	SNRPD1_U2AF1	DDX47_RRP1
HNRNPD_RBM4	MAFK_ZNF805	IRF9_STAT1
HNRNPM_U2AF1	NDUFA12_NDUFA13	MRPL18_MRPL38
HSPA8_IPO4	BCL9_SRCAP	GPS2_PRKACA
MRPL51_MRPL53	AGTR1_CYSLTR2	MRPL38_MRPL45
NDUFS7_UQCRB	ZNF444_ZNF483	CHM_RABGEF1
NUB1_PSMD9	PLRG1_SNRPN	POLR2J_U2AF1
NUP62_ZC3H11A	NDUFA13_NDUFA3	GTF2H4_TBP
OAZ1_PSMA6	COL10A1_ITGA7	ARPC1B_CAPZB
PCBP1_SF3B3	RPL36A_RPS4Y2	CNOT8_EIF4A1
POLR2F_RBBP4	RPL36A_RPL39L	GEMIN5_SNRPN
POLR2F_RBMX	NDUFA13_NDUFAB1	EED_GPS2
POLR2F_RNPS1	GABARAP_GABARAPL1	GPS2_HDAC3
POLR2F_SNRNP200	EIF4A1_PABPN1L	FOXK2_GPS2
POLR2F_YBX1	ATP6V0C_WDR59	BBS1_BBS2
PPP2R2A_RPS10	RNPS1_RPS10	ERCC5_RFC1
PRPF38A_SNRPN	DIS3L2_EIF4A1	MRPL38_MRPL54
PSMD8_PSMD9	DDX47_UTP20	PRPF4_SNRPN
PSMD9_UBA52	IPO4_NUP155	ARPC1B_WASF2
RAD50_WRN	NDUFA13_NDUFV3	BBS1_BBS4
RPL17_SPCS1	CNOT1_EIF4A1	GTF2H4_POLR1B
RPL17_TRAM1	EIF4A1_RPS4X	PPP1R8_U2AF1
SARNP_SLU7	ARL13B_UBE2V1	SNRPN_UBL5
SETD1A_SRCAP	ELF1_GPS2	RPS10_SPCS3
SNRNP48_SNRPN	CUL5_SPSB3	CTCF_UBE2V1
THOC7_ZC3H11A	CPSF3_SNRPN	SNRPN_USP39
ZNF337_ZNF548	RPP38_RPS10	NCBP1_SNRPN
ZNF526_ZNF625	EIF4A1_EIF4G1	NDUFS3_NDUFV2
ZNF625_ZNF79	ILK_RUVBL1	DNAJC8_SNRPN
ADSL_GART	NCBP2_RPL17	MRPL33_MRPL38
ATP6V0C_ATP6V0E1	RPL17_SSR1	ATP6V1E1_RNASEK
BECN1_GABARAP	EIF4A1_RPS20	PSMA6_SMURF2
CALM3_GPS2	ARPC1B_GAB1	MRPL38_MTIF2
CCNK_SMAD4	BBS1_SSTR3	COPS7B_SPSB3
COMMD1_PSMD9	RPS10_RPS3A	AKT1_ILK
CPSF1_ZC3H11A	ARPC1A_CYFIP2	MRPL38_MRPS33
CSTF1_POLR2F	CSNK1D_RPS10	NDUFS4_NDUFS7
CUL4A_POLR2F	DDX3X_EIF4A1	DDX47_WDR75
DDX47_EXOSC10	EIF3L_RPS10	CLP1_SNRPN
DHX35_SNRPN	CD151_LAMB3	NDUFA13_UQCRC1
EIF3CL_EIF3E	EIF4A1_HSP90AB1	NDUFA1_NDUFA11
EIF3CL_EIF3H	CCL11_CCL14	CDC37_ILK
EMG1_EXOSC2	EIF4A1_EIF4G2	ILK_RAC1
ERCC5_POLR2A	EIF4A1_RPS11	ILK_RICTOR
ERCC5_POLR2B	EIF4A1_RPSA	DDX47_FTSJ3
FAM50A_SNRPN	PPP2R1A_RPL17	SARNP_THOC5
FUS_U2AF1	ACTN1_ILK	SMARCC1_SRCAP
GABARAP_UBQLN1	EIF4A1_RPL13A	RPL36A_SPCS2
GNB2_GNG10	RPL17_RPS8	SARNP_SLU7
GRSF1_RPL17	EIF4A1_RPS18	EIF1AX_EIF4A1
GTF2H4_TAF11	ATP6V0C_TCIRG1	THOC7_U2AF1
HNRNPA3_POLR2F	KRI1_RPS10	CSNK2B_PAF1
HSP90AB1_TTC4	ACTR3B_ARPC1B	TOP3A_TOP3B
INTS12_POLR2F	RPL13_RPL17	GTF2H4_RNF111
LRRC49_NICN1	COG8_SPTBN2	NDUFA1_NDUFB8
MED10_POLR2F	EIF4A1_RPS27A	ILK_TNS1
MED16_POLR2F	RPS10_SMG1	CTCF_RBM4
MED17_THRAP3	EEF2_EIF4A1	SMU1_U2AF1
MRPL9_MRPS24	COL11A1_NTN4	CSTF2_SARNP
NCBP2_RPL17	COL4A6_LAMB3	ERCC5_PRPF19
NDUFA10_NDUFS7	RPL36A_RPS26	ERCC5_POLR2G
NDUFA13_UQCRC1	COL12A1_LAMB3	ILK_RAF1
NUP62_SARNP	EIF4A1_RPS6	GTF2F2_SNRPN
PCBP1_SAP18	COL11A1_COL11A2	GTF2H4_TAF1B
PES1_SENP3	ARPC1B_ITSN1	GNG10_KCNJ5
POLR2F_RBM22	EIF4A1_RPS14	PSMA6_TRAF3
POLR2F_SART1	RAD50_RBBP8	DAP3_MRPL38
PPIL3_SNRPN	RPL23A_RPS10	CHMP4A_SPAST
PSMA6_PSMB1	NUP155_U2AF1	CPSF2_SNRPN
PSMA6_USP14	COL11A1_ITGA7	MRPL3_MRPL38
PSMB1_PSMD9	RPL36A_RPS29	ILK_PPP1R12A
PSMB2_PSMD9	EIF4A1_EIF4B	ERCC5_RPA3
PTGES3_TTC4	PRSS53_TMPRSS4	POLR2K_SNRPN
RAD50_SIRT1	DNAJC3_RPL17	CWC15_U2AF1
RAD50_TRRAP	ARPC1A_CD4	RTKN_TAX1BP3
RBM34_RPF2	CDH16_PCDHB13	MRPL17_MRPL38
RBM8A_ZC3H11A	NDUFA13_NDUFS1	CDC40_SNRPN
RNPS1_SARNP	ATP6V0C_WDR24	ZNF410_ZNF813
RPL36A_SEC11A	DCP1A_RPL36A	SYF2_U2AF1
RPL36A_TRAM1	CD4_PSMA6	ZNF28_ZNF337
SNRPN_TFIP11	EIF4A1_EIF4E2	GTF2H4_PCNA
TOMM6_TOMM7	RPL36A_SECISBP2	DCLRE1C_RAD50
UQCR11_UQCRH	CSNK2B_SMC2	DDX47_EXOSC7
ZNF410_ZNF473	LTB_PSMA6	BUD13_U2AF1
ZNF564_ZNF567	EIF4H_RPS10	GPATCH1_SNRPN
ACTB_ARPC1B	EIF4A1_RPS17	EIF3CL_EIF3H
ANAPC5_PSMA6	ETF1_RPL17	AQR_SNRPN
ATG4D_GABARAP	DDX47_ESF1	GTF2H4_RNGTT
ATRIP_HUS1	PRPF3_TARDBP	EIF3CL_EIF3E
ATRIP_RFC5	GPS2_PPARA	DDX47_FBL
CCNK_POLR2A	ARHGEF18_TGFBR1	DDX47_EXOSC2
CHMP4A_LEMD2	ZNF410_ZNF93	MRPL38_MRPS34
COPS7B_POLR2F	RPL36A_RPL9	NDUFV2_SDHB
CPSF6_U2AF1	RPL36A_RPL36AL	CBX1_GPS2
CSTF2_SARNP	GSPT1_RPL36A	CWC22_SNRPN
CSTF2_SNRPN	DCN_TMPRSS6	AXIN1_SRCAP
CTNNB1_PSMA6	ZNF251_ZNF460	COPS5_EIF4A1
DNAJC8_POLR2F	CDK7_GTF2H4	RPL17_RPL30
EIF2S3_EIF3CL	PPP2R2A_RPL36A	SNRPN_WBP4
ERCC5_ERCC6	EIF4A1_RPS19	ATP6V1C1_RNASEK
ERCC5_RFC3	ARPC4_CD3D	NDUFA13_NDUFB9
ETF1_RPL17	MUC21_ST3GAL1	PHF5A_SNRPN
ETF1_RPS10	ATG4B_GABARAP	BBS1_CCT8
GABARAP_ULK1	RPL36A_UBA52	PNRC2_RPL17
GSPT1_RPS10	CASC3_RPL17	EFTUD2_SNRPN
GTF2F1_POLR2F	ELP3_SRCAP	GPS2_TRIM28
GTF2H4_POLR2D	DDB2_INO80B	IFT88_UBE2V1
GTF2H4_SUMO2	F11R_ITGAL	NDUFA13_NDUFB6
HNRNPF_SNRPN	RPL36A_RPS24	CTR9_GTF2H4
HNRNPH3_RBM4	ATP6V0C_NPRL3	PQBP1_SNRPN
KRI1_RPS10	RPL36A_SMG7	CSNK2A1_CSNK2B
LSM3_SNRPN	LRRC49_NICN1	CDK7_POLR2F
MAGOHB_POLR2F	RPL36A_SEC61G	COPS5_SPSB3
MRPL11_MRPS24	CSNK1E_TTBK2	NDUFA13_NDUFS8
MRPL38_OXA1L	ARPC1A_TGFA	GPS2_PML
MRPS24_OXA1L	EIF4A1_RPS5	GTF2H4_LEO1
NDUFA4_NDUFB8	AREG_ARPC1A	NUP107_U2AF1
NDUFA9_NDUFS3	ZNF430_ZNF444	ATP6V0C_RRAGC
NDUFA9_SDHB	FAM20A_GPC3	ERCC5_RBX1
NDUFB10_NDUFB8	RPL21_RPL36A	EIF3A_EIF3CL
NFE2L2_PSMA6	CDH3_MMP23B	DDX47_NOL11
NHEJ1_XRCC4	RPL36A_TRAM1	ERCC5_RPA1
NUP35_ZC3H11A	RPL32_RPL36A	RPL36A_UPF3A
NUP50_ZC3H11A	ARL6IP4_CPSF6	MRPL38_MRPS35
PNRC2_RPL17	EIF4A1_RPS25	NDUFA13_TMEM186
POLR2F_POLR2J	EIF4A1_RPS3	EIF3CL_EIF3D
POLR2F_SF3A1	RPL36A_RPL37	AQR_ERCC5
POLR2F_SP1	PABPC1_RPL36A	RBM8A_RPL17
POLR2F_SYMPK	EIF4A1_RPS9	SNRPB2_SNRPN
POLR2F_TAF15	NDUFA13_NDUFB1	PALB2_RTEL1
POLR2F_USP39	COL9A3_MMP13	RNF113A_SNRPN
PPP2R2A_RPL17	NEDD8_ZBTB16	ZNF410_ZNF561
PSMA6_PSMD2	LIPH_LIPI	ASF1B_IPO4
PSMC1_PSMC3	PPIL3_SNRPN	MAGOH_SARNP
RAD50_RFC1	LAMB3_PARVB	U2AF1_USP39
RAD50_TP53BP1	CSTF2_SNRPN	HDAC10_HDAC2
RBM17_SNRPN	CD99_PILRB	CSTF2T_SARNP
RBM17_U2AF1	RPL36A_RPS15	LSM3_SNRPN
RBMX2_SNRPN	PSMA6_PSMB9	ILK_MYL9
RPL36A_SPCS1	NOD2_UBE2V1	RPL36A_SRP9
RPL36A_SSR1	CAV1_LAMB3	BBS1_MKKS
RPP21_RPS15	EIF4A1_RPS27	CNOT3_EIF4A1
RPS10_SPCS2	RPL36A_RPS7	EIF1AX_RPL36A
SLU7_SNRPN	PTPRC_SPRY4	MRPL38_MRPS23
SLU7_ZC3H11A	SNRPF_SNRPN	PRPF6_U2AF1
SNIP1_SNRPN	RPL12_RPL36A	SF3B4_SNRPN
SNRPN_UPF3B	RPL11_RPL36A	EFTUD2_RBM4
SRRM2_U2AF1	COL10A1_NTN4	GPS2_KDM3A
ZBTB49_ZNF410	EIF3B_EIF4A1	NDUFA6_NDUFV2
ZNF175_ZNF410	HLA-DQA1_RILP	DDX47_NOP58
ZNF543_ZNF709	SLU7_SNRPN	CSTF1_SNRPN
ZNF709_ZNF846	ARID4A_MBD3	BBS1_CCT3
ARHGEF18_RPS27A	GPS2_NCOR1	DNAJC8_U2AF1
ARPC1B_RAC1	RPL36A_RPL37A	ARPC1B_NCK1
ATP6V0C_DEPDC5	HLF_RUNX1	NDUFB8_NDUFS3
ATRIP_DNA2	GPS2_TBL1X	AP2A1_ARPC1B
BCL9_SRCAP	NUP155_U2AF1L4	ERCC5_XPA
CASC3_U2AF1	EIF4A1_RPS6KB1	SNIP1_SNRPN
CCNK_IWS1	NR2C2_RXRG	EPC2_SRCAP
CCNK_POLR2B	ATG4D_GABARAP	ACAD9_NDUFB8
CDC40_ZC3H11A	MBD3_TBP	CLOCK_RBM4
CHD4_SRCAP	RPL36A_RPS4X	MRPL38_MRPS18B
COPS6_POLR2F	RPL17_RPL7L1	GET4_PRNP
CPSF1_SNRPN	GABBR1_GABBR2	MAP2K4_UBE2V1
CSNK2B_MAPK14	RPL27A_RPL36A	NDUFA13_NDUFV1
CSNK2B_PPP2R5D	ILK_ITGAV	RBM22_SNRPN
DAP3_MRPL53	RPL14_RPL36A	RAD50_WRN
EIF2AK4_RPL36A	EIF4G1_RPL36A	DDX47_UTP15
EIF3CL_EIF3D	NDUFA13_NDUFB4	ACAD9_NDUFV2
ERCC5_GTF2H3	RAB3GAP2_VAMP2	ARL13B_CHMP4A
GTF2H4_RBX1	ERCC6_POLR2F	ERCC5_RFC5
GTF2H4_XAB2	RPL36A_SERBP1	CHD1L_ERCC5
HNRNPD_PSMA6	RPL35A_RPL36A	MRPL38_MRPS31
HTRA2_NDUFA13	RPL19_RPL36A	ERCC5_POLR2K
LSM5_SNRPN	EIF4A1_EIF4A2	MRPL14_MRPS24
MAGOHB_SNRPN	HIF3A_PSMB8	PPIL3_U2AF1L4
METTL14_POLR2F	RPL36A_RPS20	GTF2H4_GTF2H5
MRPL18_MRPS24	RPL23_RPL36A	BBS1_LZTFL1
MRPS18C_MRPS24	PDIA4_TXNDC5	NDUFA1_NDUFS7
NDUFB8_PMPCA	RPL27_RPL36A	ZNF410_ZNF627
NUMB_PSMA6	CAMK4_GPS2	MRPL27_MRPL38
PINK1_TOMM6	EIF4A1_RPS28	CALM3_GPS2
POLR2F_POLR3F	F11R_TGFBR1	PPIE_SNRPN
POLR2F_PRCC	AREG_ARPC4	PPWD1_SNRPN
POLR2F_TAF1A	F5_TRAPPC5	POLR2F_POLR3B
POLR2F_WDR5	COL5A3_ITGA2	DDX47_RBM28
PRCC_SNRPN	NDUFA13_NDUFS5	CPSF2_U2AF1
PSMA5_PSMA6	SFTA3_SFTPB	MRPL11_MRPL38
PSMA6_PSMB2	RPL36A_RPS11	GPS2_TBL1XR1
PSMA6_PSMD3	GPS2_NCOA6	DDX47_MPHOSPH10
PSMD3_PSMD9	ATP6V1B2_RNASEK	MRPL38_MRPL51
RBM4_SNRNP70	APC_PSMA6	SNRPN_UPF3B
RPN1_SRP19	RPS10_SPCS2	MRPL22_MRPL38
RPS10_SMG6	SNRPG_U2AF1	RPS10_RPS15A
RPS10_SSR3	CIITA_MAFK	PRPF4_U2AF1
SEC13_TRAPPC5	RPL36A_SRP14	GTF2F1_SNRPN
SF3B1_U2AF1	ARPC1A_LDLR	SNRPN_ZNF830
SNRPN_SYMPK	RPL36A_RPSA	CCNH_ERCC5
TBK1_TREX1	EEF1A1_RPL36A	ERCC5_POLD3
TOMM20_TOMM6	BBS1_TTC8	NCBP1_U2AF1
U2AF1_ZC3H11A	DDOST_RPL36A	ATP6V1H_RNASEK
ZNF324_ZNF446	EIF4A1_RPS12	GTF2H4_PARP1
ZNF410_ZNF765	RPL13A_RPL36A	PNRC2_RPL36A
AGRN_NDST2	RPL36A_SMG5	EGR1_SRCAP
ARHGEF18_UBC	FABP4_MED1	ZBTB24_ZNF410
ARPC1B_HIP1	DDX47_WDR36	GTF2H4_POLR2J
ASH2L_RAD50	RPL36A_RPS18	MAGOH_U2AF1L4
ATP6V0C_ATP6V0D1	RPL31_RPL36A	MRPL37_MRPL38
ATP6V1E1_RNASEK	ERCC5_PCNA	SRCAP_TCF12
BBS1_BBS2	EIF4A1_RPS16	NDUFA10_NDUFA13
BUB3_PSMA6	CCL21_CCR8	ARPC1B_RAC1
CAND1_SPSB3	RPL36A_RPL8	PPIH_U2AF1L4
CCNK_PAF1	GALNT9_MUC16	BBS1_CCT4
CCNK_TCF12	RPL36A_SEC11A	NDUFAF2_NDUFV2
CHKA_CHKB	RPL36A_RPS27A	BBS1_BBS12
CIAO1_RTEL1	CCL21_CXCL14	EIF3CL_RPS20
CNOT2_EIF4A1	EIF4A1_TNKS1BP1	DDX47_EXOSC9
COPS6_SPSB3	RPL3_RPL36A	RPL30_RPL36A
CPSF3_ZC3H11A	EEF2_RPL36A	POLR2B_SNRPN
CREBBP_SRCAP	RPL36A_RPL7A	ZNF253_ZNF337
CSNK2B_SSRP1	RPL36A_RPL5	ZNF256_ZNF410
DDX23_SNRPN	CLDN1_CLDN3	ERCC4_ERCC5
DDX47_EXOSC3	RPL36A_RPL41	HRAS_RASA4
DDX47_NCL	GPS2_KDM1A	EIF3CL_LARP1
DHX15_SNRPN	LEF1_SRCAP	ARHGEF18_PARD3
EIF4A1_EIF4G3	RPL36A_RPS6	IK_SNRPN
ERCC5_PRPF19	RPL36A_RPL4	LSM6_SNRPN
FYTTD1_SARNP	ARPC1B_ARPC5L	ECSIT_NDUFA13
GABARAP_HSPA1B	ACTR3_ARPC1B	HDAC10_NCOR1
GSPT2_RPS10	RPL36A_RPS14	ATP6V0D1_RNASEK
GTF2E1_POLR2F	RPL36A_SSR3	GPS1_SPSB3
HDAC3_POLR2F	EIF4A1_RPS2	MAP3K7_UBE2V1
HERC2_RAD50	NDUFS4_NDUFV2	DDX3X_EIF3CL
HNRNPF_U2AF1	ATP6V0C_ATP6V1G2	ERCC5_RFC4
HSP90AB1_TXNDC5	LSM7_SNRPN	DDX47_EXOSC3
MAGOH_RPS10	PPIH_SNRPN	ERCC2_ERCC5
MRPL1_MRPS28	EIF3F_EIF4A1	PSMA6_PSMD14
MRPL12_MRPL20	RPL36A_RPLP0	GABARAP_MAP1LC3A
MRPL2_MRPS24	RPL10_RPL36A	CWC22_U2AF1
MRPL38_MRPS7	RPL36A_RPL38	ANKHD1_IRF3
MRPS24_TUFM	EIF3M_RPS10	GPS2_MECP2
NDST1_NDST2	ACTA2_CDH3	GTF2H4_RFC2
NDUFA13_NDUFA8	RUNX2_STUB1	HNRNPF_SNRPN
NDUFA13_NDUFB9	FAS_STUB1	ERCC8_GTF2H4
NDUFA13_NDUFS8	CDH16_CDH23	HDAC2_SRCAP
NDUFA6_NDUFV2	HSPA8_TXNDC5	PSMA6_PSMB3
NDUFS7_NDUFV1	COPS8_SPSB3	MRPL21_MRPL38
PDIA4_TXNDC5	PPARG_RXRG	BOP1_DDX47
POLR2J_SNRPN	RPL35_RPL36A	BBS1_BBS10
PPAN_RPL14	COL7A1_TRAPPC5	CWF19L2_POLR2F
PPAN_RRS1	RPL36A_SMG6	DDX46_SNRPN
PPIH_SNRPN	MUC21_ST6GAL1	GPKOW_U2AF1L4
PRKDC_TREX1	ZNF460_ZNF787	HTATSF1_SNRPN
PSMA3_PSMA6	RPL36A_RPLP2	SMARCA4_SRCAP
PSMA6_PSMB4	RPL24_RPL36A	AP2A2_ARPC1B
PSMA6_PSMB5	RPS10_SRP9	ATP6V1F_RNASEK
PSMA6_PSMD1	CSK_TFF3	NDUFA13_NDUFB11
RBM39_RBM4	ZNF10_ZNF460	AQR_U2AF1
RNF115_SIAH1	GALNT4_MUC21	NDUFV2_SURF1
RPL17_SRP9	ILK_LIMS1	ZNF410_ZNF440
RPL36A_SMG6	HSP90AA1_TXNDC5	DDX47_DHX37
RPS10_TRAM1	ARPC1B_HTT	PPIG_SNRPN
RPS27A_SIAH1	ARPC1B_WIPF1	ZNF410_ZNF418
UQCR10_UQCR11	LAMB3_PLG	ITCH_PSMA6
ZNF142_ZNF337	DES_DMD	PRPF40A_SNRPN
ZNF142_ZNF410	ZNF32_ZNF460	ZNF410_ZNF426
ZNF23_ZNF383	ITGB2_MST1	DDX47_NOC4L
ZNF23_ZNF397	RPL34_RPL36A	EIF4A1_PAN2
ZNF317_ZNF410	BLNK_SH3BP5	ERCC5_MNAT1
ZNF337_ZNF621	RPL36A_RPS19	RBM8A_RPL36A
ZNF530_ZNF709	CDH3_PCDH20	PARK7_UBE2V1
ZNF564_ZNF845	RPL36A_RPS17	EIF3B_EIF3CL
ARPC1B_VCL	ARIH1_EIF4A1	ASH2L_RAD50
ATP6V0A1_ATP6V0C	AUTS2_CSNK2B	PSMA5_PSMA6
ATP6V0C_MTOR	ARPC1B_CYFIP1	LENG1_SNRPN
ATP6V1H_RNASEK	RPL17_RPL28	EIF3CL_RPS3
ATRIP_FANCE	RPL17_RPL39	GTF2H4_TAF1
CCNK_CDK7	CDH3_CDH5	EIF3CL_RPS5
CHCHD1_MRPS24	COL10A1_ITGA10	NDUFV2_NUBPL
CNOT7_EIF4A1	RPL36A_RPLP1	SART1_SNRPN
COX6B1_UQCR11	RPL18_RPL36A	MALT1_UBE2V1
CPSF3_SARNP	DDIT4_SFN	ERCC5_GTF2H3
CREB1_RBM4	ILK_PARVA	ZFX_ZNF410
CREBBP_GPS2	NR1H3_RXRG	CCR1_GNG10
CTNNB1_PSMD9	EIF5B_RPL36A	DDX47_EXOSC4
CTNNBL1_SNRPN	RPL22_RPL36A	SNRPD3_U2AF1L4
DAXX_GPS2	DDX47_UTP3	RBM4_SF3B4
DDX47_DHX15	EIF4A1_RPS8	GPS2_NR1H2
DDX47_NOC4L	PLRG1_U2AF1	SF3B3_SNRPN
DDX47_NOL11	PNRC2_RPS10	NUP62_U2AF1
DDX47_NOP56	MFAP1_SNRPN	HLTF_SRCAP
DDX47_RPS6	RPL17_RPL23A	SRPK1_U2AF1
DEK_POLR2F	COL11A1_ITGA1	SARNP_THOC7
EIF2S3_EIF4A1	ADCY4_ADCY8	MAGOHB_SNRPN
EIF3CL_EIF4A2	CTNNBL1_SNRPN	CTDP1_GTF2H4
EIF4A1_GSPT1	APAF1_BCL2L1	PSMA6_SUFU
EIF4A1_RPS26	GNAI2_RGS5	ERCC5_ZNF830
EP400_SRCAP	EEFSEC_RPL36A	ACTL6A_HDAC10
ERCC3_ERCC5	KIF2A_TMED7	ERCC5_RFC3
ERCC5_POLD3	PPP2CA_RPL17	POLR2F_SNRPD1
ERCC5_RFC4	RPL36A_RPL7	EIF3CL_EIF5B
ERCC5_RPA1	ARPC1B_BAIAP2	GTF2H4_RFC1
GDI2_RABGEF1	ANK2_TMED7	ERCC5_GTF2H1
GFM2_MRPS24	RPL36A_RPS5	NUP107_SARNP
GLE1_ZC3H11A	RPL36A_RPS9	PRCC_SNRPN
GTF2H4_RNMT	DDX47_EXOSC1	ERCC5_POLR2B
HSPA8_U2AF1	NCBP2_RPL36A	ZNF410_ZNF823
MRPL10_MRPL38	RPL36A_RPS3	BBS1_CCT5
MRPL37_MRPS24	EIF4A1_EIF4E	MRPL38_MRPS30
MRPL4_MRPS24	IRAK2_UBE2V1	EIF3CL_EIF4A2
MRPL45_MRPL53	CDH3_MMP15	POLR2F_POLR3A
MRPL53_MRPS7	RPL17_RPS13	ATP6V0E1_RNASEK
NDUFA1_NDUFA9	ZNF100_ZNF410	PALB2_RAD50
NDUFA13_NDUFB5	GNAT3_RGS5	CSNK2B_SUPT16H
NDUFA7_NDUFV1	ILK_IQGAP1	MRPL19_MRPL38
NDUFS3_NDUFV2	COL9A3_ITGB2	DHX9_SNRPN
NDUFS7_UQCRC2	RPL36A_RPS25	FAM50A_SNRPN
NKAP_POLR2F	HSP90AB1_TXNDC5	RBM10_SNRPN
NUP188_ZC3H11A	RPS10_UPF3A	EFTUD2_U2AF1
NUP88_ZC3H11A	RPL17_RPL29	DDX47_NCL
PAPOLA_POLR2F	HLA-DQA2_SEC24C	DDX47_NOP14
PARP1_PCBP1	NDUFA13_NDUFC1	NDST2_SDC4
PDCD11_PPAN	ACTR2_ARPC1B	MRPL1_MRPS24
POLR2B_POLR2F	EPHA3_NGEF	RBM22_U2AF1
POLR2B_SNRPN	ARPC1B_ARPC3	ERCC5_PPIE
POLR2F_SNRPF	RPL36A_RPS27	DDX47_NOP2
POLR2F_SUPT5H	GRB7_PDGFRA	LSM5_SNRPN
POLR2F_TRA2B	ERBB3_PDGFRA	NDUFS3_NDUFS7
POLR2F_UBL5	RPL10A_RPL36A	DDX47_RPS24
POLR2F_WDR33	CSNK2B_WWOX	SNRPN_WBP11
POLR2F_ZRSR2	CD40_PSMA6	PPIL1_SNRPN
PPAN_RRP8	CDH16_PCDHGA10	DDX47_IMP4
PPAN_RRP9	ADCY3_ADCY8	RBMX2_U2AF1L4
PSMA4_PSMA6	BIRC3_PSMA6	SRCAP_TRRAP
PSMA6_PSMD13	CCL21_CCR1	EIF4A1_RPS23
PSMA6_SPOP	LAMB3_MMP2	BRMS1_HDAC10
RAD50_SMC3	EIF1AY_EIF4A1	IPO4_RPA1
RPL36AL_RPS10	CCL21_CXCR4	ATP6V0B_RNASEK
SARNP_SEC13	SRPK2_U2AF1	MRPL38_MRPS16
SART1_SNRPN	CDH16_PCDHA11	NDUFAF1_NDUFV2
SART1_U2AF1	MYD88_UBE2V1	CRTC1_RBM4
SMARCA4_SRCAP	CCL14_SMARCA4	NUP205_U2AF1
ZBTB9_ZKSCAN5	CPSF3_U2AF1	PSMA6_TP53
ZKSCAN5_ZNF709	SPTBN2_TMEM115	DHX35_SNRPN
ZNF333_ZNF337	COMP_ITGB3	DDX47_RPS7
ZNF410_ZNF513	GPKOW_SNRPN	MRPL38_MRPS22
ACTR2_ARPC1B	RPL17_RPL18A	COPS3_GTF2H4
ACTR8_SRCAP	ANK2_BET1L
AFF4_CCNK	NFKB1_TFF3
ATP6V0C_MIOS	CDH16_PCDHAC2
ATP6V0C_WDR24	MAGOH_SNRPN
BBS1_BBS12	CDH16_PCDHGB7
BUD13_POLR2F	RPL15_RPL36A
BYSL_PPAN	EIF1AX_RPS10
CCDC22_SPSB3	ABCE1_EIF4A1
CCNK_CDK12	MMP7_SMARCE1
CHMP7_GABARAP	CD36_SPI1
COPS8_SPSB3	COL10A1_ITGA1
COQ5_COQ6	SNRNP40_SNRPN
CPSF3_POLR2F	ITGB2_LAMA2
CREB1_ILK	CSNK2B_RNF2
CREBBP_POLR2F	CSTF2T_SNRPN
CSNK2A1_SENP3	SNRPD3_SNRPN
CTR9_POLR2F	RPP25_RPS10
DAP3_MRPS24	PPIL4_SNRPN
DDB1_INO80B	FAU_RPL17
DDX3X_EIF3CL	ARPC1A_WAS
DDX41_POLR2F	CSNK2B_CTR9
DDX47_RPS2	EIF4A1_EIF5
DDX47_RPS27	ATP7A_SOD3
DDX47_RPS3A	ARPC1B_VCL
DNAJC8_SNRPN	ARPC1B_WIPF3
EAF1_GTF2H4	RPL36A_UPF1
EIF3CL_LARP1	RPL17_RPS3A
EIF3M_EIF4A1	LAMA3_TMPRSS6
EIF4A1_EIF4E2	RPL36A_RPS28
EIF4A1_PAIP1	BCL2L1_REL
ELMO2_ILK	NDUFA13_NDUFS2
ERCC3_MED17	COPE_SPTBN2
ERCC5_PARP1	SF3A3_SNRPN
ERCC5_ZNF830	NDUFA13_NDUFB5
ETF1_RPL36A	RNPS1_RPL17
GABARAP_GABARAPL1	COL11A1_ITGA10
GPKOW_SNRPN	CSF2RB_SFTA3
GPS2_NCOR2	ELMO2_ILK
GPS2_PRKACA	NDUFA13_NDUFB7
GPS2_RXRA	RPL36A_RPL3L
GPS2_TBL1XR1	CDH16_PCDHA10
GPS2_TGS1	RPL36A_RPL6
GSK3B_PSMD9	SLU7_U2AF1
GTF2H4_POLR1D	ARPC1A_CBL
GTF2H5_POLR2F	GPS2_TBL1Y
HAUS7_SCLT1	RPL36A_RPS12
HAUS7_TUBB	B3GAT1_GPC3
HAUS7_YWHAE	ATP6V0A4_RNASEK
HLA-A_LAT	SEC16B_SERPINA1
HNRNPD_U2AF1	GALNT10_MUC21
HNRNPF_POLR2F	HIF3A_PSMA1
HNRNPU_U2AF1	RPL36A_RPS16
HSPA4_TXNDC5	CHM_RAB5C
HSPA9_NDUFB8	SNRPE_SNRPN
IPO4_TNPO2	IGF1_IGFBP6
MALT1_UBE2V1	ARPC1A_IL7R
MFAP1_POLR2F	RAB5C_SEC24A
MRPL12_MRPL27	CARM1_GPS2
MRPL2_MRPL38	EIF4A1_RPS21
MRPL38_MRPS2	RPL36A_RPS2
MRPL43_MRPS24	ILK_ILKAP
MRPL51_MRPS24	RPL30_RPS10
MRPS21_MRPS24	NUP155_SARNP
NDST2_SDC4	CCL14_HDAC2
NDUFA13_NDUFA2	CRNKL1_SNRPN
NDUFS2_NDUFS7	CDC5L_SNRPN
NDUFV2_UQCRB	COL16A1_LAMB3
NUP107_ZC3H11A	CTSF_HLA-DQA2
NUP205_ZC3H11A	RPL36A_SSR1
PAPOLA_SARNP	RPL17_RPS21
POLR2F_PPIL3	DCUN1D1_SPSB3
POLR2F_SNRNP25	CREBBP_GPS2
POLR2F_SNRPE	COL6A3_LAMB3
POLR2F_SUPT6H	ARPC1B_ARPC2
POLR2F_YY1	COL6A1_LAMB3
POLR2F_ZMAT2	ETF1_RPL36A
PRPF18_SNRPN	PPIL3_U2AF1
PSMA5_PSMD9	ATP6V0C_FLCN
PSMA6_RAD23B	FAM20A_VWA1
PSMA6_RPS27A	COG6_TMED7
PSMC4_PSMD9	CSNK1E_RPGRIP1L
PSMD9_PSME1	HLA-DRB5_RILP
PSMD9_TP53	ZNF410_ZNF526
RBM4_U2AF2	NDUFA11_NDUFS4
RPL17_RPS26	PPP2R1A_RPL36A
RPL17_SECISBP2	CSNK1E_TMEM67
RPL17_SSR4	SNRPA1_TARDBP
RPL36A_SECISBP2	APC_PYGO2
RPL36A_SRP68	CDH3_MMP19
RPL36A_SRP9	COG5_STX16
RPS10_UPF2	GABRA2_GABRB2
RPS10_ZC3H15	EIF4A1_PTBP1
SARNP_WDR33	B3GNT3_FMOD
SF3A3_SNRPN	ZNF337_ZNF486
SF3B2_U2AF1	TOMM20_TOMM6
SFPQ_U2AF1	ERCC5_GTF2H5
SRP19_SSR4	DYNLL2_HLA-DQA1
VEZF1_ZNF410	CAV1_COL11A1
ZNF337_ZNF343	DDX47_DDX52
ZNF394_ZNF410	ERCC6_POLD4
ZNF397_ZNF410	SNRPF_U2AF1
ARPC1A_SCARB2	NDUFA13_NDUFB10
ARPC1B_CYFIP1	NDUFA1_NDUFV2
ARPC1B_GRB2	DDX47_PDCD11
ARPC1B_NCKAP1	GNAI3_RGS5
ASH2L_POLR2F	COL4A4_LAMB3
ATG5_GABARAP	RBMX2_SNRPN
ATRIP_FANCG	PAX5_SRCAP
ATRIP_UBE2T	COL10A1_ITGA5
AXIN1_SRCAP	RPL13_RPL36A
CCNK_RPRD2	CDH16_PCDH1
CDC37_ILK	CEBPB_IGSF1
COPS4_POLR2F	RPL36A_RPS8
CPSF4_ZC3H11A	CTNNB1_ILK
CTCF_POLR2F	CELF6_REST
CWC27_POLR2F	CYSLTR2_F2RL3
DAP3_MRPL12	DNAJC3_RPL36A
DDX46_SNRPN	FCER1G_LAT
DDX47_RRP1	EIF4A1_RPS13
DHX16_SNRPN	EIF3L_EIF4A1
EIF1AX_RPL17	EIF4A1_PABPC4
EIF1AX_RPL36A	POLR2J_SNRPN
EIF2S2_EIF4A1	MUC16_ST3GAL1
EIF3A_EIF3CL	PELI1_UBE2V1
EMG1_NOC4L	SNRPD1_U2AF1L4
EP300_SRCAP	LSM7_U2AF1
ERCC5_GTF2H1	COQ10B_NDUFA13
ERCC8_GTF2H4	CSNK2B_TGFB1
ERCC8_POLR2F	COL11A1_ITGA8
GEMIN5_SNRPN	LAMA3_LAMB3
GNAS_GNG10	PPIH_U2AF1
GPS2_NCOR1	CDH16_PCDHA13
GPS2_PML	CSNK2B_GSK3B
GTF2F1_GTF2H4	SYT12_SYT9
GTF2H4_POLR2H	COL11A1_ITGA2B
GTF2H4_RPS27A	CSTF2_U2AF1
GTF2H4_SUPT6H	GABARAP_ULK1
HNRNPA1_U2AF1	ARPC4_LDLR
HNRNPU_POLR2F	RPL17_SPCS2
IK_U2AF1	GPS2_RBBP7
ILK_ILKAP	RGS22_RGS5
INTS9_POLR2F	GABRB2_NRG2
IPO4_RPA1	BTK_CD36
LTV1_RPS10	GATA2_ITGA2
MAGOHB_SARNP	DDX47_XRN2
MAP3K7_UBE2V1	LIPH_PNLIPRP3
MED6_POLR2F	SMC3_TOP3B
MRPL19_MRPS24	FAS_TNFSF13
MRPL3_MRPL53	COL27A1_ITGB2
MRPL38_MRPL43	BIRC3_CTSD
MRPL53_MTIF3	ILK_NCK2
MRPS15_MRPS24	HDAC2_HSPB6
MRPS24_MRPS9	NDUFA13_NDUFAF4
MSH6_RAD50	NDUFB8_NDUFS4
NCBP1_RPL36A	CYSLTR2_EDNRB
NDUFA13_NDUFB10	THOC5_U2AF1
NDUFA13_NDUFS5	COL11A1_LAMC3
NDUFAB1_NDUFB8	COL10A1_LAMC3
NONO_RAD50	CSNK2B_TP53
NOP56_PPAN	CCL21_CCR4
NUB1_PSMA6	CD3D_LAT
NUBP1_RTEL1	EIF4A1_FAU
NUP133_ZC3H11A	F11R_PIK3CA
NUP153_SARNP	MAFF_ZNF805
NUP50_SARNP	COL10A1_ITGA2B
PARK7_UBE2V1	BMS1_DDX47
PHF5A_POLR2F	PSMA6_PSMB8
POLR1A_POLR2F	MMP9_SCUBE3
POLR2A_POLR2F	AHI1_CSNK1E
POLR2F_PRPF19	RPL17_UPF3A
POLR2F_PRPF6	MFAP1_U2AF1
POLR2F_RBM10	SYNJ2_VAMP2
POLR2F_RFC5	CD68_SPI1
POLR2F_SNRNP27	DDX47_RRP9
POLR2F_SRRT	CCL21_CXCR6
POLR2F_TINF2	BCAS2_SNRPN
POLR2F_WBP11	EIF4A1_PAN3
POLR2F_XRCC1	SF3B5_SNRPN
PRPF4_SNRPN	MUC16_ST6GALNAC2
PSMB5_PSMD9	RTEL1_WRN
PSMC6_PSMD9	BTK_SH3BP5
PSMD9_PSME3	ARPC1B_NCKIPSD
RAD50_TERF2	HLA-DQA1_SEC24C
RBMX_U2AF1	LAMB3_MMP3
RIOK3_RPS10	HLA-DQA2_KLC2
RPL17_SRPRB	CITED1_SIN3B
RPL36A_RPL36AL	RPL36A_SMG1
RPP14_RPP21	ARPC1A_FCGR1A
RPS10_RPS26	HMOX1_VAMP2
RPS10_SPCS1	EIF2S3_EIF3CL
SARNP_THOC6	RBM8A_RPS10
SEH1L_ZC3H11A	MUC6_ST3GAL1
SLU7_U2AF1	CAV1_COL10A1
SNRNP200_U2AF1	COL11A1_PPIB
SNRPN_WBP11	ARPC4_MYH2
TCERG1_U2AF1	ERCC5_PARP1
TOMM22_TOMM6	AR_RXRG
TOMM40_TOMM5	GFM1_MRPL38
ZBTB24_ZNF410	HNRNPL_TARDBP
ZNF124_ZNF564	ASNS_ATF3
ZNF124_ZNF709	ERCC5_RFC2
ZNF23_ZNF7	COL11A1_ITGA5
ZNF283_ZNF709	CSNK2B_RPS6KA3
ZNF410_ZNF528	ERCC5_POLR2J
ZNF564_ZNF766	CWC27_SNRPN
ZNF669_ZNF709	HSP90AA1_ILK
ZNF709_ZNF749	ACTBL2_CDH16
ZNF709_ZNF77	PSMD9_TNFRSF12A
ACTR3_ARPC1B	BCL10_UBE2V1
ALG9_RPN1	CASC3_RPL36A
ARPC1A_CLTB	RPL36A_RPS21
ARPC1B_ARPC5	BTK_LAT
ARPC1B_WIPF2	GPS2_NCOR2
ATP6V0C_ATP6V1G1	CSNK2B_TAF1
ATRIP_RAD17	SPAST_VPS4A
AXIN1_PSMD9	MBD3_TAF1B
BAZ1B_POLR2F	CEP152_CSNK1E
BBS1_SSTR3	ZFP41_ZNF460
CARM1_GPS2	PPP1R8_SNRPN
CASC3_SARNP	SNRPD3_U2AF1
CDC16_PSMA6	CD36_LDLR
CDC5L_SNRPN	ARPC1A_STAM
CHM_RABGEF1	B3GNT3_MUC6
CHMP4A_CHMP5	ARPC4_CBL
CHMP4A_VPS37A	CDH16_CDH22
CHMP4A_VTA1	MRPL14_MRPL38
COG8_GCC1	EIF4A1_RPS3A
COMMD1_PSMA6	DDX47_DDX49
CPSF6_SNRPN	ZNF337_ZNF737
CSNK2B_DVL2	ZNF446_ZNF460
CSNK2B_RING1	CTNNBL1_U2AF1
CSNK2B_STARD10	HIF1A_TFF3
CSTF2T_POLR2F	COL10A1_PPIB
CTCF_RBM4	DDX47_MPHOSPH6
CUL3_PSMA6	ARF1_HLA-DQA2
CWC15_SNRPN	ARPC1B_CDC42
DDX47_EXOSC8	EIF3G_EIF4A1
DDX47_FCF1	CSNK1E_SDCCAG8
DDX47_RPS11	LAT_TREM2
DDX47_RPS14	ILK_NACA
DDX47_RPS28	SMU1_SNRPN
EFTUD2_RBM4	CRABP1_ESR1
EIF4A1_EIF4E	CA1_CA4
EIF4A1_SRP72	MRPL1_MRPL38
ERAL1_MRPL38	PCNT_UBE2V1
ERCC5_RPA3	COL10A1_ITGA8
ERCC5_USP7	CELF1_TARDBP
GABARAP_STX17	CC2D2A_CSNK1E
GPS2_MECP2	CYSLTR2_GPR4
GTF2E2_POLR2F	CDH16_PCDHB14
GTF2H4_SUMO1	ILK_JUN
HAUS7_PCM1	TFCP2L1_ZNF143
HDAC10_SNW1	FABP4_MED13
HUWE1_SIAH1	GPS2_RBBP4
ILK_PARP1	SNRNP40_U2AF1
ILK_PPP1R12A	F5_MCFD2
KLHL12_PSMD9	CBL_NEDD8
MAGOH_SNRPN	DDX47_WDR46
MED10_MED17	DES_TTN
MRPL12_MRPL15	ERCC5_RPA2
MRPL16_MRPS24	DDX47_NIP7
MRPL28_MRPL38	POLR2G_SNRPN
MRPL38_MRPL42	ATF3_IRF9
MRPL38_MRPL52	TGFA_TRAPPC5
MRPL38_MRPL55	PABPN1_ZC3H11A
MRPL38_MRPS9	F11R_PARD3
MRPL50_MRPS24	DDX47_EXOSC5
NCBP1_RPL17	MAGOH_U2AF1
NCBP1_RPS10	CSNK1E_SCLT1
NDUFA10_NDUFB8	ZNF483_ZSCAN18
NDUFA8_NDUFA9	PSMA6_PTTG1
NDUFS2_NDUFV2	ARPC1A_SYNJ2
NEDD8_PSMB3	CSTF2T_U2AF1
NUP214_ZC3H11A	PSMD9_RUNX2
NUP85_ZC3H11A	NCKAP1L_WASF3
PAK2_PSMD9	RPL36A_RPS13
POLD3_POLR2F	RPL28_RPL36A
POLR2F_POLR3A	RPL36A_RPL39
POLR2F_POLR3D	FCGR2A_LAT
POLR2F_PPP1R8	DYNLL2_HLA-DRB5
POLR2F_SUPT16H	CREB1_ILK
POLR2F_SYF2	MEAF6_SRCAP
POLR2F_TAF8	NBAS_TMED7
PRPF8_U2AF1	RPL29_RPL36A
PSMA6_PSMD5	CDC5L_U2AF1
PSMA6_PSMD6	CCL21_GNA15
PSMA6_PSMD8	GPKOW_U2AF1
PSMA6_TP53	PPP2CA_RPL36A
PSMB3_PSMD9	POU2F2_SRCAP
RIOK2_RPS10	ACTN2_COL10A1
SIAH1_SP1	CDC73_GTF2H4
SNRPN_USP39	RIPK2_UBE2V1
TMED10_TRAPPC5	GALNT9_MUC6
ZNF23_ZNF599	HLA-DQA2_OSBPL1A
ZNF426_ZNF709	LAMB3_MMP14
AHSA1_TTC4	ELP2_SRCAP
APP_GET4	CXCR4_GNG10
ARL6_BBS1	CDH16_PCDHGA11
ARPC1A_ARPC3	ZNF410_ZNF658
ATG4A_GABARAP	RGS20_RGS5
ATG4B_GABARAP	BUD13_SNRPN
ATP6V0B_RNASEK	SNRPE_U2AF1
ATP6V0C_NPRL2	ARPC1B_NCKAP1
ATRIP_CHEK1	BLOC1S3_TXNDC5
ATRIP_FANCM	CCND1_SRCAP
B2M_LAT	SYNJ1_VAMP2
BRIX1_PPAN	ERBB4_GABRB2
COPS3_POLR2F	CD55_TMED7
COPS7A_GTF2H4	ANK2_RAB1B
COPS7A_SPSB3	ARPC1B_WIPF2
CPSF2_SNRPN	ITGB7_LAMB3
CSTF1_ZC3H11A	DNAJC3_TXNDC5
CWC27_SNRPN	NCK2_SLIT1
DDX23_POLR2F	CWC15_SNRPN
DDX47_EXOSC2	BBS1_RAB3IP
DDX47_IMP4	BCL2L1_CASP8
DDX47_NOP58	LRP8_SDC1
DDX47_RPS13	MSH2_RAD50
DDX47_RPS24	BBS1_BBS7
DDX47_UTP18	COL6A2_LAMB3
DKC1_PPAN	EIF1_EIF4A1
DPF2_MAZ	ILK_XPO1
DVL3_PSMA6	CRNKL1_U2AF1
EIF2S2_EIF3CL	EIF2S2_EIF3CL
EMG1_FTSJ3	ERCC5_ERCC8
EMG1_IMP4	CHUK_UBE2V1
ERAL1_MRPL53	MAFG_NFE2L3
GPKOW_POLR2F	ARL6IP4_ZRANB2
GPS2_NR1H2	FAU_RPL36A
GSK3B_ILK	TAB2_UBE2V1
GTF2H3_GTF2H4	DDB2_NEDD8
GTF2H4_MED20	ARPC1B_SH3GL3
GTF2H4_POLD2	MBD3_REST
GTF2H4_TAF15	SERPINA3_SERPINI2
GTF2H4_TAF9	RBMX2_U2AF1
GTF2H4_UBA52	CEBPB_ZNF460
GTF3C5_POLR2F	COL20A1_LAMB3
GTPBP4_RPL36A	ILK_ITGB1
HAUS7_MAPRE1	CITED1_CTBP1
ILK_ITGAV	CDH16_PCDHB8
ILK_LIMS1	PSMA1_PSMA6
KLHL12_PSMA6	ARPC1B_GRB2
MDH2_NDUFA7	CCL21_GRK6
MED17_TBP	DCAF13_DDX47
MRPL12_MRPL37	CSNK2B_NCAPD2
MRPL13_MRPL53	GTF2B_GTF2H4
MRPL2_MRPL53	ARPC1A_CD247
MRPL22_MRPL53	SF3A3_U2AF1
MRPL3_MRPS24	RPL18A_RPL36A
MRPL33_MRPL53	NGFR_OMG
MRPL38_MTIF3	PRPF19_SNRPN
MRPL38_TUFM	EIF3CL_EIF3K
MRPS24_MRPS28	DAXX_GPS2
NCBP2_RPL36A	NDUFS6_NDUFV2
NDUFA12_NDUFA7	DHX15_TARDBP
NDUFA13_NDUFA3	CYBB_S100A9
NDUFA13_NDUFAB1	EIF4A1_EIF4H
NDUFA13_NDUFB2	CDH16_PCDHAC1
NDUFA13_NDUFB7	CITED1_POU2F1
NDUFB1_NDUFV2	ARPC1B_MYO1C
NDUFB8_NDUFC1	RPL23A_RPL36A
NDUFC2_NDUFS3	CD163_HBB
NDUFV2_UQCRFS1	FOXK1_GPS2
NUP107_SARNP	ANK2_TMEM115
NUP153_ZC3H11A	KLHL11_NEDD8
NUP205_U2AF1	CPSF3_SARNP
NUP43_SARNP	RPS10_RPS23
NUP43_ZC3H11A	NOP10_RTEL1
PNRC2_RPL36A	INHBB_TGFBR3
POLR1D_POLR2F	GNAO1_RGS5
POLR1E_POLR2F	CITED1_NCOA3
POLR2F_PQBP1	IKZF1_MBD3
POLR2F_WBP4	LTV1_RPS10
PRPF40A_U2AF1	RPL17_SRP9
PRPF6_SNRPN	KLRK1_TYROBP
PSMA6_PSMC3	PAX5_TFCP2L1
PSMA6_PSMD12	ZNF124_ZNF444
PSMC3_PSMD9	SF3B5_U2AF1
RAD50_RIF1	ZNF587_ZNF805
RAD50_VCP	ATG12_GABARAP
RBM22_SNRPN	GRB7_KIT
RBM4_SF3B4	SNRPN_SYF2
RNF7_UBE2F	COL4A2_LAMB3
RPL17_SSR2	EIF3M_EIF4A1
RPL17_SSR3	ITGB3_SPP1
RPL36A_SMG7	ERBB4_PIK3R3
RPL36A_UPF2	ZNF444_ZNF90
RPP21_RPS29	DHX8_SNRPN
RPS10_SRP54	MRPL38_MRPL47
RPS10_SSR4	BBS1_CCT2
SARNP_SRRM1	PRPF6_SNRPN
SNRPF_SNRPN	RHOB_TIAM1
SRCAP_TADA2A	ARPC4_FCGR3A
SRP19_SRP68	SRRT_TARDBP
TOP3B_TRIM28	ERCC6_TAF1C
ZNF195_ZNF337	ACTG1_ARPC1B
ZNF23_ZNF263	ARPC1B_WASL
ZNF256_ZNF410	CSNK2B_NCAPH
ZNF410_ZNF440	DDX47_FCF1
ARPC1A_CDC42	RNPS1_RPL36A
ARPC1A_VAMP8	EIF1AX_RPL17
ATRIP_BLM	DDX47_UTP6
BUD31_SNRPG	MBD3_ZNF423
CCDC22_PSMD9	ACTB_ARPC1B
CCNK_NCBP1	MAFK_NFE2L3
CDC40_SARNP	RPL36A_RPS3A
CDK5RAP3_DDRGK1	CDK11A_CSNK2A1
COPS7A_INO80B	KRR1_RPS10
COX16_COX6B1	CDH6_PCDHGC3
COX16_LRPPRC	ACTR8_SRCAP
CPSF3_SNRPN	DDX47_RCL1
CPSF6_POLR2F	DDX47_RRP1
CPSF6_SARNP	PIK3CA_PIK3R3
CSTF2_ZC3H11A	IRF9_STAT1
CTCF_UBE2V1	C5AR1_CCL21
CUL1_PSMD9	MRPL18_MRPL38
CUL4A_GTF2H4	SNRPN_ZMAT2
CWC15_POLR2F	GPS2_PRKACA
CWF19L2_POLR2F	CD4_LAT
DDX27_PPAN	GTF2H4_TAF2
DDX41_SNRPN	ZNF444_ZNF69
DDX47_MPHOSPH10	CCL21_GNG5
DDX47_NOL6	FABP4_FAM120B
DDX6_EIF4A1	MRPL38_MRPL45
DHX9_POLR2F	CHM_RABGEF1
DHX9_U2AF1	CWC27_U2AF1
DNAJB11_TXNDC5	POLR2J_U2AF1
DRG1_RPL17	GTF2H4_TBP
EIF4A3_RPL36A	ARPC1B_CAPZB
ERCC5_POLD1	DES_MYL4
ERCC5_RBX1	CNOT8_EIF4A1
GSPT1_RPL36A	GEMIN5_SNRPN
GTF2H4_MED6	ZNF100_ZNF444
GTF2H4_SUPT16H	CDH16_PCDHA6
GTF3A_POLR2F	ARPC4_FCGR2A
GTF3C1_POLR2F	HLA-DQA2_KIF22
HAUS7_PAFAH1B1	LAMB3_LIMS1
KDM4A_RAD50	DCTN6_HLA-DQA2
LARP7_SNRPN	EED_GPS2
LSM3_POLR2F	ITGB1_LAMB3
MAGOH_RPL36A	GPS2_HDAC3
MRPL11_NDUFA7	ARPC1A_SYT1
MRPL12_MRPS33	ITGB5_LAMB3
MRPL38_PTCD3	KIF2A_RAB1B
MRPL52_MRPS24	CDH16_PCDHA12
NDUFA12_NDUFA9	FOXK2_GPS2
NDUFA13_NDUFAF2	ZNF24_ZNF460
NDUFA13_NDUFS2	ACTG2_MMP9
NDUFA13_NDUFS3	DES_NEB
NDUFB8_TIMM17A	BBS1_BBS2
NOB1_RPS10	CYSLTR2_LPAR1
NUP98_U2AF1	COL10A1_PARVB
NXT1_ZC3H11A	APOL1_HBB
PCF11_SNRPN	COL9A1_LAMB3
POLR2F_POLR2K	AVPR1A_CYSLTR2
POLR2F_RFC2	ITGA2_SDC2
POLR2J_U2AF1	ERCC5_RFC1
POM121C_SARNP	MRPL38_MRPL54
PSMA6_PSMB3	PRPF4_SNRPN
PSMA6_PSMC4	CABIN1_HMGA2
PSMA6_PSMD14	CRABP1_CYP26A1
PSMA6_PSME1	CDH16_PCDHGA8
PSMA6_UBE2E1	ARPC1B_WASF2
PSMD9_SPOP	CCL21_CCL24
RAD50_SMARCAD1	BBS1_BBS4
RAD50_TP53	BCL6_EGR2
RAE1_SARNP	ITGA2_NTN4
RHOA_TAX1BP3	ARPC4_IL7R
RPL36A_UPF3B	ARPC1A_CD3G
SNRNP40_SNRPN	GTF2H4_POLR1B
SNRPB2_SNRPN	CSNK1E_PCNT
SNRPN_UBL5	PPP1R8_U2AF1
SNRPN_WDR70	SNRPN_UBL5
SRRT_U2AF1	PPARGC1A_RUNX2
U2AF1_WDR33	POLD4_WRN
UPF3B_ZC3H11A	CDH16_PCDH15
ZKSCAN1_ZNF337	RPS10_SPCS3
ZNF225_ZNF23	BET1L_COG6
ZNF227_ZNF23	CTCF_UBE2V1
ZNF564_ZNF93	CEBPA_CYBB
ACAD9_NDUFA13	SNRPN_USP39
AQR_ERCC5	MUC6_ST6GALNAC2
ATG4C_GABARAP	GABRB2_NPTN
ATP6V0C_RRAGB	CSNK2B_SMAD1
ATP6V0C_SLC38A9	CDH16_PCDHGC4
ATP6V0C_WDR59	SYNCRIP_TARDBP
ATRIP_MCM8	CDH3_MMP25
ATRIP_TIMELESS	NCBP1_SNRPN
BBS1_CCT4	ACTN2_COL11A1
BBS1_TCP1	SYTL4_SYTL5
CCAR1_U2AF1	SNRPC_SNRPN
CCR1_GNG10	HMGA2_ZNF263
CDK7_MED17	GABRA4_GABRB2
CHMP2B_GABARAP	ATP6V0C_ATP6V0E2
CKS1B_PSMD9	NDUFS3_NDUFV2
CRNKL1_SNRPN	DNAJC8_SNRPN
CUL1_PSMA6	MRPL33_MRPL38
DDX46_POLR2F	HLA-DRB5_SEC24C
DDX47_DDX52	ATP6V1E1_RNASEK
DDX47_KRR1	CTSF_HLA-DQA1
DDX47_RPS16	BCAS2_U2AF1
DHX38_SARNP	PSMA6_SMURF2
DIS3L2_EIF4A1	COL9A3_ITGB6
DYNC1H1_HAUS7	PDGFB_SPP1
EIF2S1_RPL36A	ACTB_LAMB3
EIF3J_EIF4A1	MRPL38_MTIF2
EIF4A1_PARN	THOC5_U2AF1L4
EIF4A3_POLR2F	COPS7B_SPSB3
EIF4E_RPS10	MBD3_ZMYND8
ERCC2_POLR2F	AKT1_ILK
ERCC4_GTF2H4	ACTG1_LAMB3
ERCC5_TCEA1	CEP192_CSNK1E
ERCC5_XAB2	MRPL38_MRPS33
FAM50A_POLR2F	CD3E_LAT
FANCA_TOP3B	KIF3A_TMED7
GGA1_RABGEF1	RARB_RXRG
GPS2_SMARCD3	MBD3_MECOM
GTF2F2_SNRPN	ZNF337_ZNF93
GTF2H4_RPA1	CPSF3_U2AF1L4
GTF2H4_TBP	RYR1_RYR2
GTF2H4_XRCC1	POLR2G_U2AF1
GTF2H4_ZNF830	FOXO1_PIK3R3
HAUS2_HAUS7	NDUFS4_NDUFS7
HAUS7_TUBGCP3	ZNF460_ZNF768
HDAC10_HSPA8	DDX47_WDR75
HDAC10_NCOR1	RASA4_RASAL3
HDAC10_SIN3B	SNRPG_U2AF1L4
HDAC2_SRCAP	ZNF337_ZNF676
IPO4_RAN	NRXN2_SYT12
MAGOHB_ZC3H11A	ATP6V0C_ATP6V1C2
MFAP1_SNRPN	NDUFA3_NDUFV2
MNAT1_POLR2F	TARDBP_U2AF2
MRPL11_MRPL53	POU2F2_TFCP2L1
MRPL12_MRPL21	CLP1_SNRPN
MRPL18_MRPL38	CITED1_SMAD4
MRPL20_MRPL38	HLA-DQA1_OSBPL1A
MRPL27_MRPL38	RUVBL2_SRCAP
MRPL38_MRPS34	COL11A1_ITGB7
MRPL44_MRPS24	CCL21_XCL2
MRPL52_MRPL53	NDUFA13_UQCRC1
MRPL53_MRPS31	CSNK1E_PER2
MRPL53_MRPS9	BUB1B_PSMA6
MRPS16_MRPS24	NDUFA1_NDUFA11
NBN_RAD50	NCK2_RELN
NCOR1_POLR2F	CDC37_ILK
NDUFA1_NDUFA13	ILK_RAC1
NDUFA13_NDUFB11	ILK_RICTOR
NDUFA13_NDUFB6	GABRA5_GABRB2
NDUFA2_NDUFB8	FLNB_LAMB3
NDUFA3_NDUFB8	FLNA_LAMB3
NDUFB8_TIMM50	COL11A2_ITGA2
NDUFB8_UQCRB	ZNF28_ZNF444
NDUFS1_NDUFV2	GABBR2_GNAI1
NUDT21_SARNP	DDX47_FTSJ3
PAF1_POLR2F	IL1RAP_PDGFRA
PHAX_POLR2F	SARNP_THOC5
PLRG1_SNRPN	HLA-DQA1_KLC2
POLD2_POLR2F	SMARCC1_SRCAP
POLR2B_U2AF1	RPL36A_SPCS2
POLR2F_PPIH	COG6_RAB1B
POLR2F_RFC4	B3GNT3_MUC5B
POLR2F_RPA1	EP400_HMGA2
POLR2F_SMU1	SARNP_SLU7
POLR2F_TAF7	EGR2_POLR2I
POLR2F_TERF2	ARHGEF9_GABRB2
POLR2F_ZCRB1	EIF1AX_EIF4A1
POLR2F_ZMAT5	THOC7_U2AF1
PPAN_RRP1	CSNK2B_PAF1
PPIG_SNRPN	HLA-DQB1_RILP
PRPF40A_SNRPN	ITGAE_LAMB3
PSMA2_PSMB2	TOP3A_TOP3B
PSMA6_PSMB7	RGS18_RGS5
PSMA6_PSMC2	GTF2H4_RNF111
PSMA6_PSMD4	NME1_TIAM1
PSMA6_VCP	GABRB2_GABRG2
RAD50_TOPBP1	NDUFA1_NDUFB8
RBM4_RBM4B	GABBR1_KCNJ2
RIOK1_RPS10	ERBB3_KIT
RPL17_SEC61B	ESRRA_RUNX2
RPL36A_SSR4	LARP1B_RPL26
RPS10_SRPRB	KLHL2_NEDD8
SARNP_UPF3B	CDH3_PCDHB16
THOC6_ZC3H11A	ILK_TNS1
ZNF337_ZNF506	MUC21_ST3GAL2
ZNF337_ZNF561	CSNK1E_TCTN2
ZNF337_ZNF615	COL11A1_PARVB
ZNF410_ZNF426	CTCF_RBM4
ZNF410_ZNF562	SMU1_U2AF1
ZNF410_ZNF792	ANK2_KCNQ3
ZNF573_ZNF709	DST_LAMB3
ACAD9_NDUFS7	MYC_ZNF460
AQR_SNRPN	REPS1_VAMP2
ARPC1B_BAIAP2	CEP290_CSNK1E
ATP6V0C_ATP6V1A	COL11A1_CRTAP
ATP6V0C_SH3BP4	ILK_VTN
ATP6V1F_RNASEK	CSTF2_SARNP
ATRIP_RPA3	KCNAB1_KCNQ3
BBS1_BBS4	ZNF587_ZNF737
BBS1_CCT3	ERCC5_PRPF19
BBS1_CCT8	DCTN3_HLA-DQA2
CALR_PSMA6	CNBP_DPP4
CCNH_GTF2H4	ARPC1B_MYO10
CCNH_POLR2F	FCER1A_LAT
CDC23_PSMD9	NDUFA13_TMEM126B
CDC5L_RAD50	PLRG1_U2AF1L4
CNOT8_EIF4A1	IER2_SMARCB1
COX5A_UQCR11	PRKCA_RXRG
CSNK1D_HAUS7	ERCC5_POLR2G
CSNK2B_PAF1	CYB5R1_HBA1
CSTF2_POLR2F	ILK_RAF1
CUL2_PSMA6	CDH16_CDH17
CUL4A_INO80B	GTF2F2_SNRPN
CUL4B_ERCC5	GTF2H4_TAF1B
DAP3_MRPL38	GNG10_KCNJ5
DDB2_ERCC5	CCDC12_SNRPN
DDX41_TREX1	PSMA6_TRAF3
DDX47_DDX49	ACTA1_MMP9
DDX47_DDX56	RGS10_RGS5
DDX47_DHX37	ARHGEF18_CGN
DDX47_UTP20	DAP3_MRPL38
DDX47_WDR75	CTNNB1_TFF3
DHX8_SNRPN	HLA-DPB1_KLC1
DIABLO_XIAP	CSF1R_KIT
DNAJC19_TOMM5	DDX47_RPS27L
DRG1_RPS10	COL9A3_ITGAX
EED_POLR2F	CHMP4A_SPAST
EFTUD2_SNRPN	LAMC2_PAK3
EFTUD2_U2AF1	ARPC4_CYFIP2
EIF1AX_RPS10	EIF4A3_SNRPN
EIF3CL_EIF3M	CPSF2_SNRPN
EIF3CL_EIF5	MRPL3_MRPL38
EMG1_UTP14A	CCL21_GNG8
ERCC5_POLD2	SYT1_VAMP2
ERCC5_POLR2G	CCL21_CCL26
ERCC5_POLR2J	CDH16_PCDHA4
FTSJ3_RBM34	ILK_PPP1R12A
GABARAP_PIK3C3	CDH16_PCDHGA6
GNL2_ZNF593	ERCC5_RPA3
GPS2_NCOA6	ASNS_PHGDH
GTF2H4_PAF1	BMP1_LAMB3
GTF2H4_RFC5	AURKB_DES
HAUS7_HAUS8	PRKCQ_UBE2V1
HAUS7_NUMA1	LSM2_SNRPN
HRAS_RABGEF1	ZNF208_ZNF251
INTS5_POLR2F	HIF3A_PSMD14
IRF9_STAT1	POLR2K_SNRPN
IRF9_STAT2	GRB2_TFF3
KAT5_RTEL1	APOBEC3G_PSMA6
LAT_PLCG1	ARID4B_MBD3
MAGOH_SARNP	HMGA2_SP3
MRPL11_MRPL38	CTCF_TOP3B
MRPL21_MRPL53	CDH16_PCDHGA12
MRPL22_MRPL38	ACTN4_LAMB3
MRPL27_MRPS24	CWC15_U2AF1
MRPL38_MRPL4	CDH15_CDH16
MRPL38_MRPS27	LAT_LCP2
MRPS18B_MRPS24	COL1A2_LAMB3
MRPS24_MRPS30	KLC1_NBAS
MRPS24_MRPS5	CYB5RL_HBA1
NDUFA1_NDUFA7	COL11A1_LAMA5
NDUFA1_NDUFB8	RXRB_RXRG
NDUFA13_NDUFA6	COL10A1_ITGB7
NDUFA13_NDUFAF1	HIVEP1_ZNF444
NDUFA13_NDUFB3	ERBB3_FLT4
NUP107_U2AF1	CDH16_PCDHA8
NUP160_ZC3H11A	CDK9_TARDBP
PCBP1_PRPF19	FLG_PKP3
POLR2F_PRPF38A	HIF3A_PSMA5
POLR2F_RFC3	CDH16_PCDHB11
POLR2F_SF3B4	STX16_VTI1A
POLR2F_SLU7	RTKN_TAX1BP3
POLR2F_SNRPB2	DCAF17_NEDD8
POLR2F_TAF12	MRPL17_MRPL38
POLR2F_TAF3	CDC40_SNRPN
POLR2F_USP7	ANK2_COPE
PPP2R2A_RPL36A	CDH16_PCDHA9
PPWD1_SNRPN	COL4A1_LAMB3
PRPF19_SNRPN	RXRA_RXRG
PRPF3_U2AF1	ZNF410_ZNF813
PSMA6_SKP1	DCAF6_DCAF8
PSMA6_UBXN7	HNRNPH1_TARDBP
RAB4B_RAB7A	HIF3A_PSMB3
RAD50_RBBP8	CD14_CD36
RAD51C_RTEL1	EIF3CL_EIF3I
RBMX2_U2AF1L4	ZNF253_ZNF444
RPS10_SSR1	GAN_NEDD8
RPS10_UPF3B	HLA-DPB1_LAT
SARNP_THOC7	RBM39_TARDBP
SMU1_SNRPN	SYF2_U2AF1
SRCAP_TRRAP	IRF9_TNFSF11
SYMPK_U2AF1	FZD4_WNT10A
U2AF1_YBX1	ZNF266_ZNF460
ZNF23_ZNF621	DPP4_GCG
ZNF337_ZNF394	ZNF28_ZNF337
ZNF337_ZNF426	F11R_PARD6B
ZNF410_ZNF510	GTF2H4_PCNA
ZNF410_ZNF567	RASA2_RASA4
ZNF564_ZNF586	EIF3CL_EIF3J
AIFM1_NDUFA9	ILK_PARVB
ARPC1B_ARPC5L	COL10A1_LAMA5
ASNS_HDAC2	DCLRE1C_RAD50
ATP6V0B_ATP6V0C	SNRPD2_SNRPN
ATP6V0C_ATP6V1C1	FAM20A_IGFBP3
ATP6V0C_RRAGA	DDX47_EXOSC7
ATP6V0C_SEH1L	UBE2NL_UBE2V1
ATP6V0C_TCIRG1	BUD13_U2AF1
ATP6V0E1_RNASEK	CSNK2B_NCAPG
ATP6V1B2_RNASEK	RILP_SPTBN2
ATRIP_MCM4	GPATCH1_SNRPN
ATRIP_SMARCAL1	EIF3CL_EIF3H
ATRIP_TOP3A	AQR_SNRPN
BBS1_MKKS	EP300_TARDBP
BCAS2_SNRPN	GTF2H4_RNGTT
BMS1_DDX47	SNRPC_U2AF1
CCNK_SP1	EIF3CL_EIF3E
CDC16_PSMD9	U2AF1_ZMAT2
CKAP5_ILK	HIRA_LMNB1
COMMD1_SPSB3	CEP135_CSNK1E
COPS5_GTF2H4	LAMB3_PLEC
CPSF7_SARNP	BRCA2_RTEL1
CSNK2A2_CSNK2B	ITGAL_LAMB3
CSNK2B_NCAPD2	NFKB1_SRCAP
DDX18_DDX47	PBX3_SRCAP
DDX46_U2AF1	DDX47_FBL
DDX47_EXOSC9	DDX47_EXOSC2
DDX47_RCL1	MFAP2_MFAP4
DDX47_RRP9	CSTF2_U2AF1L4
DDX47_UTP14A	MAFK_ZNF595
DHX16_POLR2F	COL10A1_CRTAP
DPY30_POLR2F	NDUFA8_NDUFV2
DYNC1I2_HAUS7	COL9A3_LAMC2
EIF2S2_RPL17	HLA-DQA2_SH3GL2
EIF3K_EIF4A1	ZNF587_ZNF708
ELP3_SRCAP	MRPL38_MRPS34
EMG1_NAT10	NDUFV2_SDHB
GAK_RABGEF1	CBX1_GPS2
[truncated: 1,002 more rows]

## Sheet: Table S4
Table S4_UniCox_PFS_results
Terms	HR[exp(coef)]	coef	95% CI lower	95% CI upper	Z	P value	class
EIF4A1_RPS5	0.00593303	-5.12722	-10.0451	-0.209333	-2.04339	0.0410137	Protective
EEF1G_SNRNP200	0.00967936	-4.63776	-9.10266	-0.172854	-2.03584	0.0417662	Protective
EIF4A1_RPS7	0.0301889	-3.50028	-6.86045	-0.140113	-2.04169	0.0411822	Protective
RBM4_SF3B4	0.105947	-2.24482	-3.63537	-0.854276	-3.16406	0.00155584	Protective
ATP6V0C_WDR24	0.167549	-1.78648	-2.98003	-0.592937	-2.93365	0.00335006	Protective
EIF1AX_RPL17	0.171697	-1.76202	-2.99418	-0.529862	-2.8028	0.00506611	Protective
EIF3J_RPS10	0.179971	-1.71496	-3.03833	-0.391587	-2.53992	0.0110878	Protective
NDUFA13_TMEM186	0.18191	-1.70424	-3.01459	-0.393898	-2.54914	0.0107989	Protective
EIF4A1_PARN	0.200937	-1.60476	-3.15418	-0.0553457	-2.02997	0.0423591	Protective
EIF3J_EIF4A1	0.2073	-1.57359	-3.03302	-0.11415	-2.11326	0.0345782	Protective
EIF1AX_RPS10	0.211118	-1.55534	-2.69359	-0.417084	-2.67814	0.00740312	Protective
EIF1AX_EIF4A1	0.249486	-1.38835	-2.58224	-0.194465	-2.27921	0.0226545	Protective
ATP6V0C_RPTOR	0.280607	-1.2708	-2.47885	-0.0627463	-2.06176	0.0392302	Protective
EIF1AX_RPL36A	0.299651	-1.20514	-2.23774	-0.172535	-2.28745	0.0221696	Protective
CCNH_ERCC5	0.311497	-1.16636	-2.29445	-0.0382767	-2.02647	0.042717	Protective
DNAJC3_RPL17	0.320177	-1.13888	-2.20188	-0.0758762	-2.09986	0.0357408	Protective
ARPC1B_HTT	0.330853	-1.10608	-2.03314	-0.179018	-2.33844	0.0193646	Protective
EGR1_SRCAP	0.337345	-1.08665	-1.79841	-0.374888	-2.99229	0.00276895	Protective
DNAJC3_TXNDC5	0.338489	-1.08326	-2.15594	-0.0105845	-1.9793	0.0477818	Protective
DNAJC3_RPS10	0.373511	-0.984808	-1.9398	-0.0298138	-2.02115	0.0432641	Protective
PPIL1_SNRPN	0.374341	-0.982588	-1.8119	-0.153273	-2.3222	0.020222	Protective
MSH2_RAD50	0.415905	-0.877299	-1.74204	-0.0125577	-1.98843	0.0467646	Protective
SARNP_THOC5	0.449338	-0.799981	-1.50954	-0.090422	-2.20973	0.0271239	Protective
ATP6V0C_FNIP1	0.49916	-0.694828	-1.38828	-0.0013726	-1.96384	0.0495482	Protective
CCL14_SMARCA4	0.510615	-0.672139	-1.18012	-0.164161	-2.59336	0.00950442	Protective
HRAS_RASA4	0.609363	-0.495341	-0.981609	-0.00907254	-1.99653	0.045876	Protective
RPS10_SEC11C	2.03019	0.70813	0.034891	1.38137	2.06154	0.0392515	Risk
THOC5_U2AF1	2.06133	0.723349	0.0726447	1.37405	2.17877	0.0293484	Risk
RPL17_SEC11C	2.13533	0.758619	0.0378451	1.47939	2.06287	0.0391246	Risk
GNAI2_RGS5	2.35301	0.855694	0.23001	1.48138	2.68047	0.00735184	Risk
GTF2H4_GTF2H5	2.53232	0.929136	0.0500381	1.80823	2.07152	0.0383098	Risk
RPS10_RPS27L	2.58154	0.948385	0.0692416	1.82753	2.11433	0.034487	Risk
NUP210_ZC3H11A	2.69787	0.992463	0.333128	1.6518	2.95023	0.00317535	Risk
RPL36A_SEC61B	2.93777	1.07765	0.0843071	2.07099	2.12631	0.0334774	Risk
PPWD1_SNRPN	2.95913	1.08489	0.263201	1.90659	2.58777	0.00965996	Risk
NUP62_U2AF1	2.97918	1.09165	0.119478	2.06382	2.20084	0.0277473	Risk
RPL17_SEC61B	2.98787	1.09456	0.0952564	2.09386	2.14679	0.0318097	Risk
ERCC5_XPA	3.05636	1.11722	0.180096	2.05435	2.33663	0.0194586	Risk
SF3B4_SNRPN	3.11289	1.13555	0.0925434	2.17856	2.13387	0.0328537	Risk
ERCC5_GTF2H5	3.46666	1.24319	0.286033	2.20035	2.54567	0.0109068	Risk
RTKN_TAX1BP3	3.66587	1.29907	0.163015	2.43512	2.2412	0.0250128	Risk
RPS10_SEC61B	3.713	1.31184	0.24864	2.37504	2.41832	0.0155923	Risk
RPL36A_SPCS2	3.77909	1.32948	0.466896	2.19207	3.02084	0.00252074	Risk
RPL17_SPCS2	4.03727	1.39557	0.50194	2.2892	3.06085	0.00220709	Risk
RPS10_SPCS2	4.21812	1.43939	0.552024	2.32675	3.17925	0.00147659	Risk
CNOT8_EIF4A1	4.39636	1.48078	0.0251798	2.93638	1.99387	0.0461664	Risk
DAXX_GPS2	5.43008	1.69195	0.380446	3.00346	2.52852	0.0114546	Risk
IPO4_RPA1	5.51452	1.70738	0.731555	2.68321	3.4293	0.000605142	Risk
ATG12_GABARAP	5.54433	1.71278	0.199986	3.22557	2.21906	0.0264823	Risk
NDST2_SDC4	5.6862	1.73804	0.650078	2.82601	3.13108	0.00174166	Risk
NUP107_ZC3H11A	7.32809	1.99171	0.188454	3.79498	2.16479	0.0304034	Risk
CNOT10_EIF4A1	8.60216	2.15201	0.279106	4.02492	2.25204	0.0243195	Risk
CSNK2B_PAF1	10.9177	2.39038	0.0342548	4.74651	1.98846	0.0467609	Risk
DDX47_MPHOSPH6	13.0774	2.57088	0.747329	4.39444	2.7632	0.00572384	Risk
RPS10_SEC11A	14.6388	2.68367	0.0465855	5.32076	1.99459	0.0460879	Risk
TPR_ZC3H11A	20.2692	3.0091	0.106682	5.91152	2.032	0.0421532	Risk
EIF3B_EIF4A1	21.9314	3.08792	0.254676	5.92116	2.13614	0.0326678	Risk
RPS10_SRP14	59.5254	4.0864	0.230439	7.94237	2.07709	0.0377928	Risk
EEF1G_HSPA5	1102.29	7.00515	0.813561	13.1967	2.2175	0.026589	Risk
NUP62_ZC3H11A	3.53509	1.26274	-0.00359523	2.52907	1.9544	0.050654	NS
RPL36A_SEC11C	1.97783	0.682002	-0.00321411	1.36722	1.95077	0.0510844	NS
RPL17_SMG7	0.163199	-1.81279	-3.64521	0.0196396	-1.93896	0.0525065	NS
MRPL21_MRPL38	0.330717	-1.10649	-2.23188	0.0188999	-1.92705	0.0539736	NS
ATP6V0C_RRAGD	0.661828	-0.41275	-0.832818	0.0073192	-1.92581	0.0541276	NS
ABI1_ARPC1B	2.45009	0.896126	-0.0240013	1.81625	1.90884	0.0562829	NS
AP2A1_ARPC1B	2.82463	1.03838	-0.0285288	2.10529	1.90756	0.0564487	NS
RPL36A_SMG7	0.153929	-1.87126	-3.79758	0.0550537	-1.90395	0.0569169	NS
BRMS1_HDAC10	0.365615	-1.00617	-2.04388	0.0315311	-1.90041	0.0573794	NS
PSMA6_TP53	0.414072	-0.881716	-1.79692	0.0334822	-1.88826	0.0589911	NS
GEMIN5_SNRPN	2.23606	0.804716	-0.0320736	1.6415	1.88484	0.0594515	NS
RBM22_U2AF1	3.62594	1.28811	-0.052426	2.62865	1.88331	0.0596579	NS
NDUFA13_NDUFB9	0.132429	-2.02171	-4.14916	0.105739	-1.86255	0.0625257	NS
CSTF1_SNRPN	2.57661	0.946476	-0.0508005	1.94375	1.86012	0.0628678	NS
PNRC2_RPL17	0.194142	-1.63917	-3.36757	0.0892383	-1.85877	0.0630597	NS
ACAD9_NDUFB8	3.49444	1.25117	-0.0722813	2.57463	1.85292	0.0638939	NS
CTCF_RBM4	3.09277	1.12907	-0.0662609	2.32439	1.85132	0.064124	NS
NUP107_U2AF1	2.49261	0.913331	-0.0548743	1.88154	1.84888	0.0644751	NS
RPS10_SPCS3	3.25236	1.17938	-0.0718056	2.43057	1.84748	0.0646774	NS
RPL17_RPS27L	2.19672	0.786966	-0.0479272	1.62186	1.84745	0.0646817	NS
ACAD9_NDUFA13	4.54444	1.51391	-0.0985816	3.12639	1.84014	0.0657478	NS
NOP10_RTEL1	0.494388	-0.704434	-1.4627	0.0538341	-1.82081	0.0686351	NS
EIF4A1_FOS	1.66534	0.510031	-0.040934	1.061	1.81435	0.0696241	NS
DNAJC3_RPL36A	0.420704	-0.865826	-1.8051	0.0734516	-1.80669	0.0708099	NS
ATP6V0B_RNASEK	0.179871	-1.71551	-3.57715	0.146127	-1.80612	0.0708997	NS
RPL36A_RPS27L	2.22144	0.798153	-0.0687007	1.66501	1.80463	0.0711324	NS
RPS10_SEC61G	2.32086	0.841936	-0.077405	1.76128	1.79494	0.0726628	NS
ERCC6_POLR2F	1.57858	0.456525	-0.0450058	0.958056	1.78408	0.0744102	NS
CDK7_POLR2F	1.86964	0.625747	-0.0656947	1.31719	1.77375	0.0761053	NS
EFTUD2_RBM4	3.61261	1.28443	-0.135559	2.70442	1.77286	0.0762524	NS
PPIL3_U2AF1	2.49764	0.915345	-0.097983	1.92867	1.77045	0.0766527	NS
ATP6V0C_MLST8	0.343746	-1.06785	-2.25119	0.115483	-1.76869	0.0769459	NS
THOC5_ZC3H11A	1.76838	0.570065	-0.0640122	1.20414	1.7621	0.0780526	NS
EIF3H_EIF4A1	20.9613	3.04268	-0.357372	6.44273	1.75396	0.079438	NS
GSK3B_ILK	2.42513	0.885886	-0.104354	1.87613	1.75342	0.0795303	NS
EIF3I_EIF4A1	15.015	2.70905	-0.345182	5.76328	1.73845	0.082131	NS
DDX47_PDCD11	0.379125	-0.969891	-2.06923	0.129447	-1.72918	0.0837771	NS
ATP6V0C_RRAGA	2.98411	1.0933	-0.14646	2.33306	1.72842	0.0839126	NS
HLTF_SRCAP	0.53275	-0.629703	-1.34471	0.0853056	-1.72613	0.0843247	NS
RPL17_SEC11A	18.5515	2.92055	-0.415145	6.25625	1.71604	0.0861554	NS
RPL17_SMG5	0.216929	-1.52818	-3.28533	0.228966	-1.70457	0.0882746	NS
NDUFAF2_NDUFV2	2.67867	0.98532	-0.148733	2.11937	1.70291	0.0885847	NS
CPSF3_SARNP	3.26465	1.18315	-0.178782	2.54509	1.70268	0.0886284	NS
DDX47_UTP14A	0.308261	-1.17681	-2.53347	0.179856	-1.70013	0.089107	NS
RBM22_SNRPN	2.5083	0.919604	-0.143107	1.98231	1.69603	0.0898801	NS
RPL17_SSR3	5.7347	1.74654	-0.272003	3.76507	1.69585	0.0899135	NS
PRPF40A_SNRPN	2.37805	0.866282	-0.135752	1.86832	1.69443	0.0901827	NS
DDX3X_EIF3CL	0.18103	-1.7091	-3.68927	0.27108	-1.69165	0.0907126	NS
RPS10_SRPRB	2.06478	0.725025	-0.120423	1.57047	1.68079	0.0928031	NS
CASP3_EIF4A1	3.36579	1.21366	-0.20396	2.63128	1.67797	0.093352	NS
ELMO2_ILK	2.85535	1.0492	-0.179481	2.27787	1.67366	0.0941977	NS
ACAD9_NDUFV2	2.31912	0.841189	-0.144213	1.82659	1.67312	0.0943029	NS
CSNK2B_TP53	0.387975	-0.946813	-2.06503	0.171401	-1.65954	0.0970074	NS
RAD50_RBBP8	1.74287	0.555534	-0.101787	1.21286	1.65646	0.0976283	NS
RPL36A_SEC61G	2.20617	0.791258	-0.146332	1.72885	1.65407	0.0981137	NS
RPS10_SSR3	4.03501	1.39501	-0.259405	3.04942	1.65265	0.0984022	NS
GABARAP_GABARAPL2	4.59193	1.5243	-0.285006	3.33361	1.65123	0.0986924	NS
ATG4A_GABARAP	0.341434	-1.0746	-2.35455	0.205349	-1.64552	0.0998634	NS
DDX46_SNRPN	1.95003	0.667845	-0.127965	1.46365	1.6448	0.10001	NS
RPL36A_SMG5	0.274499	-1.29281	-2.84144	0.255825	-1.63619	0.1018	NS
MFAP1_SNRPN	0.374904	-0.981084	-2.15641	0.194239	-1.63605	0.101829	NS
ATP6V0C_NPRL2	0.435661	-0.830892	-1.82755	0.165763	-1.63398	0.102262	NS
RPL17_SEC61G	2.10273	0.743239	-0.150185	1.63666	1.63049	0.102997	NS
EIF4A1_RPS19	0.0129598	-4.34591	-9.57555	0.883737	-1.62876	0.103364	NS
FOS_ILK	0.632886	-0.457466	-1.01268	0.0977527	-1.61489	0.106335	NS
CPSF3_U2AF1	2.41781	0.882862	-0.195583	1.96131	1.60451	0.108601	NS
RPL36A_SRPRB	2.09869	0.741312	-0.164536	1.64716	1.60396	0.108723	NS
DHX8_SNRPN	2.07146	0.728254	-0.16491	1.62142	1.59808	0.110024	NS
RPL17_SRPRB	1.9924	0.689341	-0.156274	1.53496	1.59775	0.110098	NS
POM121_ZC3H11A	3.8744	1.35439	-0.307584	3.01637	1.59723	0.110214	NS
ARPC1B_ARPC3	0.34799	-1.05558	-2.35437	0.243203	-1.59295	0.111171	NS
NDUFA13_NDUFA6	2.08842	0.736408	-0.170156	1.64297	1.59209	0.111364	NS
SLU7_SNRPN	2.29362	0.830129	-0.192157	1.85242	1.59155	0.111485	NS
ARPC1B_CYFIP1	0.431293	-0.840967	-1.87783	0.195901	-1.58966	0.111912	NS
RPS10_SMG7	0.249895	-1.38671	-3.11694	0.343515	-1.57084	0.11622	NS
RPL17_TRAM1	8.52049	2.14247	-0.566887	4.85183	1.54988	0.121171	NS
AQR_SNRPN	2.15002	0.765478	-0.202819	1.73378	1.54943	0.121278	NS
RPL17_SRP14	24.9869	3.21835	-0.85715	7.29385	1.54775	0.121683	NS
EEF1B2_EEF1G	6.01148	1.79367	-0.484456	4.0718	1.54317	0.12279	NS
GSPT2_RPS10	0.371124	-0.991219	-2.2535	0.271067	-1.53908	0.123786	NS
ERCC5_RBX1	1.7278	0.546848	-0.149794	1.24349	1.53853	0.12392	NS
ERCC5_RPA1	2.14059	0.761081	-0.209097	1.73126	1.53754	0.12416	NS
NOB1_RPS10	3.13178	1.1416	-0.316875	2.60008	1.53413	0.124997	NS
ZNF410_ZNF93	0.325704	-1.12177	-2.55507	0.311537	-1.53395	0.125041	NS
DDX47_EXOSC7	2.09844	0.741193	-0.209532	1.69192	1.528	0.126512	NS
NDUFV2_NUBPL	0.516587	-0.660512	-1.5128	0.19177	-1.51896	0.128773	NS
EIF2AK4_RPS10	0.428867	-0.846608	-1.93962	0.246407	-1.51811	0.128986	NS
AKT1_ILK	6.2454	1.83185	-0.534663	4.19835	1.51715	0.129229	NS
RPS10_RPS7	0.0103443	-4.57132	-10.4874	1.34473	-1.51446	0.129909	NS
EIF4A1_RPS16	0.0182129	-4.00562	-9.19789	1.18664	-1.51203	0.130525	NS
NDUFA13_NDUFA8	2.56335	0.941316	-0.284437	2.16707	1.50515	0.132285	NS
EIF2AK4_RPL17	0.406448	-0.900299	-2.08172	0.281122	-1.49359	0.135284	NS
GABARAP_GABARAPL1	2.57172	0.944574	-0.295842	2.18499	1.49251	0.135566	NS
EIF4A1_PABPC1	0.0265331	-3.62936	-8.4173	1.15857	-1.4857	0.137359	NS
EIF4A1_RPS29	0.0818655	-2.50268	-5.81279	0.807433	-1.48187	0.138375	NS
GET4_PRNP	1.59975	0.469846	-0.156574	1.09627	1.47007	0.141543	NS
RPS10_SMG5	0.275398	-1.28954	-3.00971	0.430628	-1.46931	0.14175	NS
ATP6V0C_SESN1	1.82946	0.604023	-0.202356	1.4104	1.46812	0.142071	NS
CNOT6_EIF4A1	2.38745	0.870227	-0.295668	2.03612	1.46292	0.143489	NS
PRPF6_U2AF1	2.91112	1.06854	-0.364066	2.50114	1.46188	0.143774	NS
GPATCH1_SNRPN	2.0951	0.7396	-0.25297	1.73217	1.46044	0.144169	NS
RPL17_RPS7	0.0589395	-2.83124	-6.63396	0.971473	-1.45926	0.144495	NS
SYMPK_ZC3H11A	2.51983	0.924193	-0.318934	2.16732	1.45712	0.145083	NS
ERCC5_RFC5	0.558131	-0.583161	-1.36953	0.20321	-1.45348	0.14609	NS
RPS10_TRAM1	4.73252	1.55446	-0.547587	3.6565	1.44939	0.147229	NS
ERCC5_POLR2G	1.97983	0.683009	-0.240802	1.60682	1.44908	0.147316	NS
BBS1_TTC8	2.08065	0.732683	-0.263419	1.72878	1.44165	0.1494	NS
RPS10_RPS13	37.8526	3.6337	-1.321	8.5884	1.43741	0.150602	NS
PPIL3_SNRPN	1.93339	0.659274	-0.240921	1.55947	1.43542	0.151169	NS
NUP155_ZC3H11A	2.2567	0.813906	-0.312734	1.94055	1.41592	0.1568	NS
SLU7_U2AF1	2.1895	0.783671	-0.307088	1.87443	1.40816	0.159083	NS
ATP6AP1_ATP6V0C	3.81675	1.3394	-0.525422	3.20422	1.40773	0.15921	NS
ERCC5_PRPF19	3.01818	1.10465	-0.440688	2.65	1.40104	0.161203	NS
RPS10_RPS17	55.3214	4.01316	-1.65409	9.68041	1.38791	0.165164	NS
MRPL27_MRPL38	0.404932	-0.904037	-2.18474	0.376668	-1.38352	0.166506	NS
DHX38_ZC3H11A	2.84895	1.04695	-0.440394	2.5343	1.37963	0.167701	NS
CLOCK_RBM4	1.41134	0.344542	-0.146771	0.835854	1.37446	0.169299	NS
CPSF3_SNRPN	2.11758	0.750272	-0.320156	1.8207	1.37376	0.169518	NS
ERCC5_PPIE	2.12518	0.753859	-0.324902	1.83262	1.36966	0.170793	NS
ERCC5_POLR2K	2.06691	0.726054	-0.313317	1.76542	1.36914	0.170957	NS
FAU_RPS10	0.0202149	-3.90134	-9.48654	1.68387	-1.36906	0.170981	NS
ACTN1_ILK	0.647916	-0.433994	-1.05732	0.189329	-1.36464	0.172366	NS
EIF4A1_RPS25	0.0362882	-3.31626	-8.0862	1.45367	-1.36265	0.172993	NS
SNRPN_WBP4	3.35917	1.21169	-0.531856	2.95524	1.36209	0.173169	NS
NDUFA13_UQCRC1	0.191057	-1.65518	-4.03878	0.728413	-1.36101	0.17351	NS
SNRPN_WDR70	0.539567	-0.616989	-1.50674	0.272761	-1.35912	0.174109	NS
EIF4A1_RPS28	0.826572	-0.190468	-0.465329	0.0843936	-1.35818	0.174408	NS
IK_SNRPN	2.2895	0.828335	-0.368982	2.02565	1.35595	0.175114	NS
CRNKL1_SNRPN	2.00887	0.697573	-0.311717	1.70686	1.35463	0.175534	NS
EIF4A1_RPS23	0.029568	-3.52106	-8.65745	1.61532	-1.34358	0.179083	NS
GTF2H4_RFC2	0.443304	-0.813499	-2.00033	0.37333	-1.34344	0.179131	NS
CKAP5_ILK	1.92167	0.653193	-0.300828	1.60721	1.34194	0.179617	NS
BBS1_BBS12	0.471229	-0.75241	-1.85147	0.346653	-1.34178	0.179669	NS
ERCC6_GTF2H4	1.61524	0.479482	-0.222728	1.18169	1.3383	0.180799	NS
ATP6V0C_NPRL3	0.435425	-0.831432	-2.05247	0.389604	-1.33459	0.182012	NS
RPL36A_RPS28	0.830847	-0.185309	-0.458861	0.0882422	-1.32772	0.184271	NS
PPIL4_SNRPN	0.49178	-0.709723	-1.76085	0.341408	-1.32337	0.185713	NS
ASH2L_RAD50	0.537317	-0.621168	-1.54124	0.298903	-1.32323	0.185758	NS
ILK_RUVBL2	0.417503	-0.873463	-2.16942	0.422492	-1.321	0.186501	NS
ATP6V0C_FLCN	0.599126	-0.512284	-1.27938	0.254807	-1.30892	0.190563	NS
AP2A2_ARPC1B	1.95924	0.672558	-0.33509	1.68021	1.30818	0.190811	NS
RPL36A_RPL9	0.840459	-0.173807	-0.434558	0.0869431	-1.30645	0.191401	NS
PLRG1_U2AF1	1.63766	0.493265	-0.24703	1.23356	1.30594	0.191572	NS
NDUFA13_NDUFAF1	2.9984	1.09808	-0.550496	2.74665	1.30549	0.191727	NS
GABARAP_ULK2	0.46441	-0.766988	-1.91877	0.384794	-1.30517	0.191836	NS
RPN1_RPS10	0.0808378	-2.51531	-6.29734	1.26672	-1.30351	0.1924	NS
DDX47_IMP4	0.510271	-0.672813	-1.68551	0.339883	-1.30216	0.192863	NS
RPL17_RPS28	0.83324	-0.182433	-0.457593	0.0927272	-1.29947	0.193783	NS
ERCC5_MNAT1	2.41522	0.881789	-0.452344	2.21592	1.29543	0.195172	NS
RPL36A_RPS7	0.162034	-1.81995	-4.57666	0.936767	-1.29394	0.195685	NS
EIF4A3_RPS10	0.379752	-0.968236	-2.43621	0.499736	-1.29274	0.196101	NS
NUP107_SARNP	1.70857	0.53566	-0.276909	1.34823	1.29204	0.196342	NS
ATP6V0C_RRAGC	0.646047	-0.436883	-1.09991	0.226141	-1.29147	0.196541	NS
NDUFA13_NDUFAF4	2.25792	0.814446	-0.422475	2.05137	1.29053	0.196866	NS
EIF4A1_RPS3A	0.0658147	-2.72091	-6.8576	1.41577	-1.28917	0.197339	NS
PRPF6_SNRPN	2.17647	0.777704	-0.405659	1.96107	1.28808	0.197717	NS
EIF3B_EIF3CL	7.07671	1.95681	-1.02417	4.93779	1.28658	0.19824	NS
RPL36AL_RPS10	0.167913	-1.78431	-4.50894	0.940313	-1.28355	0.1993	NS
RPS10_RPS28	0.833285	-0.182379	-0.46126	0.0965017	-1.28175	0.199929	NS
NUP155_U2AF1	1.51397	0.414735	-0.219516	1.04899	1.28161	0.199978	NS
RPS10_SRP9	4.01099	1.38904	-0.738363	3.51644	1.27971	0.200646	NS
RPL17_RPL9	0.84217	-0.171773	-0.435056	0.0915101	-1.27873	0.200991	NS
RBBP8_RTEL1	0.718076	-0.33118	-0.840905	0.178545	-1.27343	0.202865	NS
EIF4A1_RPS21	0.137153	-1.98666	-5.04601	1.07269	-1.27275	0.203107	NS
RNF7_SPSB3	0.515503	-0.662611	-1.68469	0.359471	-1.27064	0.203858	NS
ATP6V0C_CCDC115	0.429498	-0.845137	-2.14885	0.45858	-1.27055	0.203889	NS
AQR_U2AF1	1.62897	0.487949	-0.267385	1.24328	1.26615	0.205461	NS
SNRPN_WBP11	0.54942	-0.598893	-1.52763	0.329847	-1.26387	0.206276	NS
ATP6V0A2_ATP6V0C	1.89602	0.639759	-0.354677	1.6342	1.26092	0.207338	NS
ARPC1B_NCKAP1	0.544883	-0.607183	-1.55122	0.336858	-1.2606	0.207453	NS
NDUFA13_NDUFB6	2.26907	0.819369	-0.454802	2.09354	1.26038	0.207534	NS
GTF2B_GTF2H4	0.555809	-0.587331	-1.50073	0.326071	-1.26029	0.207566	NS
PPP2CA_RPS10	0.229751	-1.47076	-3.75824	0.816721	-1.26018	0.207605	NS
EIF3F_RPS10	0.186772	-1.67786	-4.2898	0.93407	-1.25905	0.208013	NS
NDUFV2_SURF1	0.514864	-0.663853	-1.69867	0.370966	-1.25735	0.208627	NS
MRPL38_MRPL47	2.11835	0.750636	-0.419484	1.92076	1.25732	0.208637	NS
CSNK2B_TGFBR1	1.37646	0.319517	-0.179805	0.818839	1.25418	0.209776	NS
MRPL38_MTIF2	0.592298	-0.523745	-1.34274	0.295248	-1.25339	0.210062	NS
SYF2_U2AF1	2.4501	0.89613	-0.507346	2.29961	1.25145	0.21077	NS
RPL9_RPS10	1.18192	0.167138	-0.0954551	0.429731	1.2475	0.212215	NS
EIF4A1_EIF4B	0.0802317	-2.52284	-6.48938	1.4437	-1.2466	0.212546	NS
RPL6_RPS10	0.0481252	-3.03395	-7.80657	1.73867	-1.24595	0.212784	NS
NUP98_ZC3H11A	0.276083	-1.28705	-3.31509	0.740987	-1.24385	0.213555	NS
MAP2K4_UBE2V1	0.448645	-0.801522	-2.06516	0.462116	-1.2432	0.213794	NS
PLRG1_SNRPN	1.67607	0.51645	-0.29983	1.33273	1.24004	0.214959	NS
ARPC1B_GRB2	0.470461	-0.754042	-1.94729	0.43921	-1.23854	0.215514	NS
SMARCA4_SRCAP	0.283717	-1.25978	-3.26364	0.744081	-1.23218	0.217881	NS
CRNKL1_U2AF1	1.84363	0.611734	-0.365515	1.58898	1.22689	0.219864	NS
TOMM6_TOMM7	2.95764	1.08439	-0.650201	2.81899	1.22528	0.220468	NS
ERCC5_ERCC6	0.582007	-0.541272	-1.41036	0.327819	-1.22067	0.222211	NS
GABARAP_UVRAG	2.12713	0.754775	-0.459967	1.96952	1.21782	0.223294	NS
COQ10B_NDUFA13	0.551632	-0.594875	-1.55388	0.364131	-1.21577	0.224071	NS
ARPC1B_WASF2	0.553966	-0.590652	-1.54329	0.36199	-1.21521	0.224287	NS
EIF4A1_RPS18	0.0353605	-3.34216	-8.73422	2.0499	-1.21484	0.224425	NS
SRPK1_U2AF1	1.54813	0.437046	-0.26903	1.14312	1.21318	0.225063	NS
GPS2_PPARA	0.714106	-0.336724	-0.881627	0.20818	-1.21116	0.225834	NS
MAP3K7_UBE2V1	1.67195	0.51399	-0.319068	1.34705	1.20928	0.226555	NS
RPS10_RPS27A	24.5086	3.19902	-1.99473	8.39278	1.20721	0.22735	NS
BBS1_BBS10	2.32293	0.842827	-0.52789	2.21355	1.20514	0.228148	NS
PNRC2_RPL36A	0.455032	-0.787388	-2.07347	0.498696	-1.19996	0.230154	NS
RPL17_SRP9	4.6164	1.52961	-0.977021	4.03625	1.19602	0.231688	NS
GRSF1_RPS10	0.280025	-1.27288	-3.36209	0.816334	-1.19413	0.232426	NS
ANKHD1_IRF3	1.4518	0.372803	-0.240666	0.986271	1.19106	0.233629	NS
EIF4A3_RPL17	0.370117	-0.993935	-2.62987	0.641998	-1.1908	0.23373	NS
ILK_XPO1	0.394258	-0.930751	-2.46544	0.603935	-1.18867	0.234569	NS
COPS7A_SPSB3	0.601576	-0.508202	-1.34909	0.332687	-1.18453	0.236203	NS
EIF3E_EIF4A1	7.53873	2.02005	-1.3225	5.36261	1.18449	0.236218	NS
FOXK2_GPS2	1.83563	0.607388	-0.397911	1.61269	1.18418	0.23634	NS
HDAC2_SRCAP	0.406492	-0.90019	-2.3973	0.596923	-1.1785	0.238599	NS
NUP153_ZC3H11A	1.77693	0.574886	-0.383266	1.53304	1.17597	0.239608	NS
RPL17_RPL23A	0.15932	-1.83684	-4.90075	1.22706	-1.17502	0.239987	NS
EIF4A1_RPS14	0.0414959	-3.18216	-8.49147	2.12715	-1.17471	0.240109	NS
CD74_MIF	1.72802	0.546978	-0.367509	1.46147	1.1723	0.241075	NS
EIF3B_RPS10	6.80463	1.9176	-1.29222	5.12742	1.17092	0.241632	NS
ILK_RAF1	0.373579	-0.984626	-2.63331	0.664059	-1.17053	0.241789	NS
RPL36A_RPL38	0.160509	-1.82941	-4.89402	1.23521	-1.16999	0.242004	NS
CTCF_UBE2V1	2.28667	0.827095	-0.560122	2.21431	1.16858	0.242572	NS
ATP6V0C_WDR59	0.543211	-0.610258	-1.63541	0.414898	-1.16673	0.243318	NS
EIF2AK4_RPL36A	0.549648	-0.598477	-1.60387	0.406911	-1.16671	0.243329	NS
ACTG1_ARPC1B	1.87666	0.629496	-0.431282	1.69027	1.1631	0.24479	NS
NXF1_ZC3H11A	0.507578	-0.678104	-1.82132	0.465109	-1.16257	0.245006	NS
ATP6V0C_MIOS	0.567791	-0.566002	-1.52309	0.39109	-1.15908	0.246425	NS
GRSF1_RPL17	0.220147	-1.51346	-4.08717	1.06025	-1.15255	0.249095	NS
ACTB_ARPC1B	1.86881	0.6253	-0.438119	1.68872	1.15248	0.249125	NS
FOXK1_GPS2	1.43683	0.362443	-0.254983	0.979869	1.15054	0.249921	NS
DIS3L2_EIF4A1	1.85595	0.618394	-0.436371	1.67316	1.1491	0.250515	NS
ATP6V0C_FNIP2	0.768169	-0.263745	-0.71374	0.18625	-1.14875	0.25066	NS
NDUFA1_NDUFA13	0.530199	-0.634504	-1.7184	0.449395	-1.14734	0.25124	NS
EIF3CL_LARP1	0.142565	-1.94796	-5.28679	1.39087	-1.14349	0.252834	NS
EIF4A1_RPS2	0.0733126	-2.61302	-7.09717	1.87113	-1.14212	0.253405	NS
POM121C_ZC3H11A	1.86452	0.623006	-0.44817	1.69418	1.13993	0.254314	NS
DDX47_RCL1	2.79126	1.02649	-0.73894	2.79193	1.1396	0.254452	NS
RBMX2_U2AF1	1.79872	0.587075	-0.424704	1.59885	1.13725	0.255434	NS
EIF4A1_RPS20	0.0424819	-3.15868	-8.61912	2.30176	-1.13377	0.25689	NS
ATP6V1D_RNASEK	0.448774	-0.801236	-2.19391	0.591437	-1.12761	0.259484	NS
ARPC1B_RAC1	0.510731	-0.671913	-1.84038	0.496555	-1.12705	0.25972	NS
EIF4A3_ZC3H11A	0.488319	-0.716786	-1.96613	0.532556	-1.12449	0.260804	NS
EIF4A1_EIF4G1	0.0838888	-2.47826	-6.79939	1.84287	-1.12408	0.260978	NS
RPL17_RPN1	14.3802	2.66585	-1.98413	7.31583	1.12365	0.26116	NS
RPL37A_RPS10	0.0459047	-3.08119	-8.46326	2.30089	-1.12206	0.261836	NS
CLP1_ZC3H11A	0.411813	-0.887185	-2.43952	0.665152	-1.12015	0.26265	NS
CTR9_GTF2H4	0.703989	-0.350993	-0.967413	0.265428	-1.11601	0.264417	NS
ATP6V0C_DEPDC5	0.54738	-0.602612	-1.66113	0.45591	-1.1158	0.264508	NS
MYD88_UBE2V1	1.49287	0.400701	-0.305737	1.10714	1.11172	0.26626	NS
RPL23A_RPL36A	3.55854	1.26935	-0.970637	3.50934	1.11067	0.266711	NS
ATG4C_GABARAP	0.449629	-0.799333	-2.21143	0.612767	-1.10946	0.267233	NS
RPL23_RPS10	0.0467718	-3.06247	-8.48947	2.36452	-1.10602	0.268719	NS
HTATSF1_SNRPN	0.465453	-0.764745	-2.1259	0.596409	-1.10118	0.270819	NS
ERCC5_PCNA	1.55536	0.441705	-0.348343	1.23175	1.09579	0.273171	NS
DDX47_DHX37	0.48799	-0.71746	-2.00158	0.566659	-1.09507	0.273488	NS
POLR2F_POLR3A	0.751454	-0.285745	-0.798533	0.227043	-1.09217	0.27476	NS
CNOT2_EIF4A1	2.65949	0.978133	-0.780176	2.73644	1.09031	0.275576	NS
FAM50A_SNRPN	1.58488	0.460511	-0.367694	1.28872	1.08981	0.275797	NS
NDUFA13_NDUFC1	1.94469	0.665104	-0.531311	1.86152	1.08957	0.275902	NS
PPP2CA_RPL17	0.238323	-1.43413	-4.02554	1.15728	-1.08468	0.278065	NS
EIF4A1_RPS11	0.0481338	-3.03377	-8.53189	2.46435	-1.08148	0.279486	NS
ARPC1B_WASL	0.62828	-0.46477	-1.30785	0.378305	-1.08049	0.279925	NS
RPL7A_RPS10	0.0718326	-2.63342	-7.41718	2.15034	-1.07894	0.280613	NS
ILK_PARP1	0.507948	-0.677375	-1.9109	0.556145	-1.07629	0.281795	NS
NDUFA13_NDUFB1	1.57449	0.453935	-0.374612	1.28248	1.0738	0.282911	NS
EIF4A1_PAN3	0.590437	-0.526892	-1.48951	0.435722	-1.0728	0.283362	NS
NUP37_ZC3H11A	0.426583	-0.851948	-2.40859	0.704696	-1.07268	0.283413	NS
RPL12_RPS10	0.0479509	-3.03758	-8.59148	2.51632	-1.07196	0.283739	NS
ZNF410_ZNF526	0.512707	-0.668051	-1.89076	0.554654	-1.07087	0.284229	NS
EIF4A1_EIF5	0.371044	-0.991435	-2.80996	0.827088	-1.06855	0.285274	NS
EIF4A1_RPS8	0.0500501	-2.99473	-8.50572	2.51626	-1.06507	0.286846	NS
CSTF2T_ZC3H11A	0.479797	-0.734392	-2.08603	0.617249	-1.06491	0.286915	NS
RPL23A_RPS10	8.50464	2.14061	-1.81101	6.09224	1.06172	0.288362	NS
RPL35_RPS10	0.0359257	-3.3263	-9.48294	2.83033	-1.05893	0.289632	NS
EIF4A1_EIF4E2	0.352278	-1.04333	-2.97468	0.888016	-1.05879	0.289695	NS
RPL36A_SSR3	2.35714	0.857448	-0.730663	2.44556	1.05822	0.289956	NS
COPS4_SPSB3	0.736762	-0.30549	-0.871948	0.260968	-1.057	0.290509	NS
RPS10_TSR1	0.532145	-0.63084	-1.8017	0.540016	-1.056	0.290968	NS
ARPC1B_CDC42	0.544539	-0.607816	-1.73967	0.524039	-1.05252	0.292562	NS
ARPC1B_WIPF2	0.719462	-0.329252	-0.944624	0.286121	-1.04867	0.294331	NS
EIF3G_EIF4A1	3.10537	1.13313	-0.986267	3.25254	1.04789	0.294689	NS
EIF3L_RPS10	0.127889	-2.0566	-5.91391	1.80072	-1.04499	0.296028	NS
COPS8_SPSB3	0.687918	-0.374086	-1.07656	0.32839	-1.04373	0.29661	NS
RPLP2_RPS10	0.045595	-3.08796	-8.88843	2.71252	-1.04341	0.296758	NS
EIF4A1_EIF4A2	0.102618	-2.27674	-6.56478	2.0113	-1.04065	0.29804	NS
U2AF1_USP39	0.594629	-0.519817	-1.49908	0.459446	-1.0404	0.298155	NS
RPL27A_RPS10	0.0578989	-2.84906	-8.21822	2.52011	-1.04002	0.29833	NS
EIF4A1_RPS9	0.0545162	-2.90926	-8.39622	2.57771	-1.0392	0.298713	NS
RPL34_RPS10	0.0639092	-2.75029	-7.94229	2.4417	-1.03823	0.299164	NS
ATP6V0C_SLC38A9	0.487904	-0.717637	-2.07976	0.644482	-1.03261	0.301785	NS
NDUFA13_NDUFAF2	0.508268	-0.676745	-1.96266	0.609167	-1.03148	0.302314	NS
SRRM1_ZC3H11A	2.75506	1.01344	-0.915123	2.942	1.02994	0.303038	NS
RPL10A_RPS10	0.0830804	-2.48795	-7.23732	2.26143	-1.02672	0.304552	NS
EIF3K_RPS10	0.169328	-1.77592	-5.16728	1.61545	-1.02635	0.304726	NS
RPS10_SERBP1	5.07081	1.6235	-1.47997	4.72697	1.02531	0.305219	NS
DDX3X_EIF4A1	0.331281	-1.10479	-3.21871	1.00913	-1.02433	0.305681	NS
GNG10_KCNJ5	0.736898	-0.305306	-0.890164	0.279551	-1.02314	0.306243	NS
EIF4A1_EIF4H	0.160286	-1.83079	-5.34666	1.68507	-1.0206	0.307444	NS
GABARAP_MAP1LC3A	1.37191	0.316206	-0.295666	0.928077	1.01288	0.311118	NS
DDX47_RPS24	2.98389	1.09323	-1.02703	3.21348	1.01058	0.312217	NS
CREB1_ILK	1.64353	0.496846	-0.466964	1.46066	1.01037	0.31232	NS
PCNT_UBE2V1	1.70586	0.534067	-0.505636	1.57377	1.00678	0.314041	NS
RPL17_RPL6	29.7491	3.3928	-3.22408	10.0097	1.00497	0.314912	NS
ARPC1B_CAPZB	0.55893	-0.581731	-1.71641	0.552947	-1.00484	0.314973	NS
EIF3CL_RPS3	22.996	3.13532	-2.98601	9.25665	1.00388	0.315434	NS
BBS1_BBS2	0.563311	-0.573924	-1.69493	0.547082	-1.00345	0.315645	NS
DDX47_UTP20	0.630148	-0.461801	-1.36394	0.440339	-1.0033	0.315718	NS
NUP155_SARNP	1.34242	0.294474	-0.280977	0.869924	1.00297	0.315877	NS
PELI1_UBE2V1	0.830179	-0.186115	-0.54999	0.177761	-1.00248	0.316112	NS
PARK7_UBE2V1	0.22203	-1.50494	-4.45239	1.4425	-1.00074	0.316951	NS
SNRPN_USP39	0.577853	-0.548436	-1.62479	0.527923	-0.998658	0.31796	NS
RPS10_RPS24	10.5061	2.35196	-2.27672	6.98063	0.995911	0.319293	NS
EIF4A1_SRP72	0.472321	-0.750097	-2.23037	0.730173	-0.993173	0.320626	NS
DCAF13_DDX47	0.48289	-0.727967	-2.16667	0.710738	-0.991717	0.321335	NS
RPN2_RPS10	0.32806	-1.11456	-3.31788	1.08876	-0.991457	0.321463	NS
CCR1_GNG10	1.39974	0.336286	-0.328865	1.00144	0.990916	0.321726	NS
SNRPD3_U2AF1	2.10346	0.743582	-0.727196	2.21436	0.9909	0.321734	NS
SMU1_SNRPN	0.302896	-1.19437	-3.55748	1.16875	-0.990604	0.321879	NS
DDX47_FCF1	1.62403	0.484913	-0.47654	1.44637	0.988516	0.3229	NS
RPL5_RPS10	0.108891	-2.21741	-6.62265	2.18784	-0.986558	0.323859	NS
PSMA6_PSMD14	2.45422	0.897808	-0.886417	2.68203	0.986239	0.324016	NS
THOC7_U2AF1	1.65243	0.502248	-0.496265	1.50076	0.985855	0.324204	NS
GPS2_NCOA6	0.70791	-0.345439	-1.03258	0.341705	-0.985307	0.324473	NS
BECN1_GABARAP	2.52954	0.928038	-0.918453	2.77453	0.985069	0.32459	NS
ARPC1B_ARPC2	0.487095	-0.719296	-2.15492	0.716331	-0.982006	0.326097	NS
ARPC1B_MYO1C	0.54381	-0.609155	-1.82502	0.606707	-0.981955	0.326122	NS
GPS2_HDAC3	0.646238	-0.436587	-1.30891	0.435737	-0.980937	0.326624	NS
ATP6V0C_MTOR	0.650781	-0.429583	-1.28801	0.428844	-0.980825	0.326679	NS
ERCC5_POLD3	2.02395	0.705052	-0.706874	2.11698	0.978717	0.32772	NS
RPLP1_RPS10	0.0851312	-2.46356	-7.40134	2.47421	-0.977868	0.328139	NS
RPS10_RPS3	9.28319	2.22821	-2.25128	6.70769	0.974934	0.329593	NS
RPS10_RPS12	8.49795	2.13983	-2.16599	6.44564	0.974026	0.330043	NS
PAPOLA_ZC3H11A	0.249968	-1.38642	-4.1768	1.40396	-0.973824	0.330144	NS
RAD50_WRN	2.09407	0.739108	-0.749088	2.2273	0.97341	0.33035	NS
EIF4A1_PABPC4	0.391967	-0.936577	-2.8339	0.960743	-0.9675	0.333294	NS
PPP2R1A_RPS10	0.106478	-2.23981	-6.78014	2.30051	-0.966881	0.333604	NS
NDUFA6_NDUFV2	0.608244	-0.49718	-1.50634	0.511983	-0.965607	0.334241	NS
ATP6V0C_KPTN	0.469985	-0.755055	-2.28898	0.778867	-0.964769	0.33466	NS
CDK7_GTF2H4	1.68056	0.519124	-0.535858	1.57411	0.964438	0.334827	NS
ATP6V0C_SH3BP4	1.35793	0.305961	-0.316313	0.928236	0.96368	0.335207	NS
DDX47_NCL	2.72706	1.00322	-1.03966	3.04611	0.962505	0.335796	NS
MRPL38_MRPL54	1.67141	0.513668	-0.534069	1.5614	0.9609	0.336603	NS
TOMM40_TOMM6	1.94165	0.663539	-0.690854	2.01793	0.960218	0.336945	NS
RPL13A_RPS10	0.101077	-2.29187	-6.99202	2.40828	-0.955709	0.339219	NS
DDX47_WDR36	0.598028	-0.514118	-1.57601	0.547776	-0.948921	0.342661	NS
ATP6V1H_RNASEK	0.577652	-0.548784	-1.68357	0.586004	-0.947839	0.343211	NS
RPS10_RPS4X	7.45728	2.00919	-2.15534	6.17372	0.945592	0.344357	NS
IMPACT_RPL36A	1.53427	0.428054	-0.459722	1.31583	0.945025	0.344646	NS
CUL5_SPSB3	0.773639	-0.256649	-0.790552	0.277253	-0.942163	0.346109	NS
CSNK2B_NCAPD2	0.610677	-0.493187	-1.51974	0.533362	-0.941629	0.346382	NS
NDUFA13_NDUFB3	1.70245	0.532069	-0.575619	1.63976	0.941452	0.346473	NS
IPO4_NUP155	1.61667	0.480367	-0.520513	1.48125	0.940674	0.346872	NS
RPL4_RPS10	0.123005	-2.09553	-6.46249	2.27143	-0.940509	0.346957	NS
RPL13_RPS10	0.0913584	-2.39297	-7.38789	2.60196	-0.938979	0.347742	NS
ARPC1B_ITSN1	0.722416	-0.325155	-1.00421	0.353896	-0.938503	0.347986	NS
NDUFA12_NDUFA13	0.54759	-0.602228	-1.86003	0.65557	-0.938422	0.348028	NS
RPL17_SERBP1	8.32987	2.11985	-2.31098	6.55067	0.937709	0.348394	NS
PCF11_ZC3H11A	0.622634	-0.473796	-1.46583	0.518237	-0.936081	0.349231	NS
NDUFA1_NDUFB8	0.531643	-0.631782	-1.96423	0.700662	-0.929323	0.352722	NS
CSTF1_ZC3H11A	1.80215	0.588983	-0.656814	1.83478	0.926624	0.354122	NS
PPIG_SNRPN	1.56127	0.445499	-0.497345	1.38834	0.926094	0.354397	NS
RPS10_SRP54	1.68653	0.522671	-0.584731	1.63007	0.925063	0.354933	NS
RPL36A_RPS29	0.304863	-1.18789	-3.70652	1.33073	-0.924403	0.355277	NS
RPL3_RPS10	0.132111	-2.02411	-6.31842	2.2702	-0.923825	0.355578	NS
EIF2S3_RPS10	0.240022	-1.42702	-4.45477	1.60072	-0.923762	0.35561	NS
ATP6V0A1_ATP6V0C	1.86476	0.623131	-0.70389	1.95015	0.920343	0.357394	NS
RPL15_RPS10	0.133039	-2.01711	-6.3195	2.28528	-0.9189	0.358148	NS
CTNNBL1_U2AF1	1.92687	0.655896	-0.74344	2.05523	0.918673	0.358266	NS
EIF4A1_RPS26	0.79183	-0.233409	-0.731463	0.264644	-0.918523	0.358345	NS
RPS10_RPS6	7.3425	1.99368	-2.26439	6.25175	0.917678	0.358788	NS
EFTUD2_SNRPN	1.71569	0.539817	-0.614713	1.69435	0.916409	0.359453	NS
BCAS2_SNRPN	0.524235	-0.645815	-2.0289	0.737274	-0.91518	0.360097	NS
SARNP_SLU7	0.665448	-0.407295	-1.27961	0.465016	-0.915136	0.36012	NS
ATP6V0C_SESN2	1.34116	0.293533	-0.335873	0.92294	0.914058	0.360686	NS
SMARCC1_SRCAP	2.45556	0.898354	-1.0306	2.82731	0.912797	0.361349	NS
SLU7_ZC3H11A	2.13115	0.756662	-0.868502	2.38183	0.912542	0.361483	NS
PPIL3_U2AF1L4	1.45116	0.372365	-0.428023	1.17275	0.911836	0.361855	NS
GPS2_SUZ12	0.750055	-0.287609	-0.906343	0.331126	-0.911057	0.362265	NS
MRPL38_MRPS31	1.52399	0.42133	-0.486214	1.32887	0.909919	0.362865	NS
NDUFA13_NDUFAB1	1.64499	0.497737	-0.577023	1.5725	0.907688	0.364043	NS
DDOST_RPS10	0.210383	-1.55883	-4.93581	1.81816	-0.904726	0.365611	NS
ATG4D_GABARAP	0.629084	-0.463491	-1.47377	0.546784	-0.899186	0.368553	NS
EFTUD2_U2AF1	1.56054	0.44503	-0.525209	1.41527	0.898998	0.368654	NS
GTF2H4_POLR1B	0.740347	-0.300636	-0.957759	0.356486	-0.896692	0.369883	NS
RPL17_RPL38	0.216949	-1.52809	-4.87292	1.81673	-0.895415	0.370565	NS
EIF4A1_HSP90AB1	0.0922908	-2.38281	-7.60815	2.84253	-0.893765	0.371448	NS
CARM1_GPS2	1.6307	0.489007	-0.583483	1.5615	0.893655	0.371506	NS
COPS6_SPSB3	0.611567	-0.491731	-1.57062	0.587159	-0.893302	0.371695	NS
GPS2_MED1	0.766498	-0.265923	-0.849682	0.317836	-0.892834	0.371946	NS
CREBBP_GPS2	1.41027	0.343783	-0.41129	1.09886	0.892367	0.372196	NS
RAE1_ZC3H11A	1.62196	0.483636	-0.579146	1.54642	0.891912	0.37244	NS
RPL18_RPS10	0.0929708	-2.37547	-7.6025	2.85156	-0.890723	0.373078	NS
CSNK2B_GSK3B	0.668016	-0.403443	-1.30003	0.493143	-0.881939	0.37781	NS
RPL36A_RPS26	0.797786	-0.225915	-0.728874	0.277044	-0.880361	0.378664	NS
IMPACT_RPL17	1.5194	0.418318	-0.51384	1.35048	0.87956	0.379098	NS
COPS3_SPSB3	0.725347	-0.321105	-1.03708	0.394869	-0.879017	0.379392	NS
RPL17_RPN2	3.82792	1.34232	-1.66058	4.34522	0.876119	0.380965	NS
EEF1A1_RPS10	0.151615	-1.88641	-6.10843	2.33561	-0.875716	0.381184	NS
RPL17_SRP54	1.76013	0.565386	-0.701488	1.83226	0.874701	0.381737	NS
SNRPN_ZNF830	0.604813	-0.502836	-1.63679	0.631121	-0.869116	0.384784	NS
RPL17_RPS29	0.198347	-1.61774	-5.27763	2.04216	-0.866338	0.386305	NS
RPL24_RPS10	0.0968193	-2.33491	-7.62182	2.95201	-0.865597	0.386711	NS
RPL8_RPS10	0.139634	-1.96873	-6.47716	2.53971	-0.855871	0.392069	NS
RPL22_RPS10	0.111979	-2.18944	-7.20605	2.82716	-0.855405	0.392327	NS
HDAC10_HDAC2	1.36968	0.314578	-0.40718	1.03634	0.85425	0.392967	NS
RPL19_RPS10	0.139517	-1.96957	-6.49829	2.55916	-0.8524	0.393992	NS
RPL36A_RPS21	0.314774	-1.1559	-3.81485	1.50305	-0.852038	0.394193	NS
POLR2F_POLR3B	0.770484	-0.260736	-0.86065	0.339179	-0.851843	0.394301	NS
DDX47_FTSJ3	1.65996	0.506791	-0.65931	1.67289	0.851806	0.394322	NS
RPL11_RPS10	0.127556	-2.0592	-6.8048	2.6864	-0.850464	0.395067	NS
COPS5_SPSB3	0.688659	-0.373009	-1.23379	0.487767	-0.849331	0.395697	NS
BBS1_MKKS	1.46615	0.38264	-0.503191	1.26847	0.846619	0.397208	NS
ATP6V0C_SEC13	0.476329	-0.741646	-2.46481	0.981513	-0.843567	0.398912	NS
ILK_NACA	0.36315	-1.01294	-3.36743	1.34156	-0.843206	0.399113	NS
EIF4A1_RPL13A	0.0861087	-2.45214	-8.15778	3.25349	-0.842345	0.399595	NS
RPL17_RPS27A	21.4138	3.06404	-4.10559	10.2337	0.837617	0.402246	NS
RPL17_RPS17	13.7402	2.62032	-3.53477	8.77542	0.834389	0.404062	NS
RPL26L1_RPL36A	1.68717	0.523051	-0.70654	1.75264	0.833742	0.404427	NS
NDUFS4_NDUFV2	1.51304	0.41412	-0.560043	1.38828	0.833187	0.404739	NS
EIF2S1_EIF4A1	2.15176	0.766285	-1.03697	2.56954	0.832879	0.404913	NS
GPKOW_U2AF1L4	0.655172	-0.422858	-1.41993	0.574213	-0.831222	0.405848	NS
ZNF410_ZNF627	0.600899	-0.509329	-1.7183	0.699641	-0.825716	0.408965	NS
LARP4_RPS10	0.691273	-0.36922	-1.2476	0.509157	-0.823858	0.41002	NS
RPL17_SMG1	0.677472	-0.389387	-1.31692	0.538148	-0.822809	0.410617	NS
RPS10_RPS9	7.57565	2.02494	-2.80156	6.85144	0.822295	0.410909	NS
RPL36A_SMG1	0.712396	-0.339121	-1.14784	0.4696	-0.821872	0.41115	NS
ILK_PARVA	1.41141	0.344589	-0.477628	1.16681	0.821416	0.411409	NS
EEF2_RPS10	0.176325	-1.73543	-5.87752	2.40667	-0.821174	0.411547	NS
PSMA6_PSMB3	1.86057	0.620884	-0.866021	2.10779	0.818418	0.413118	NS
POLDIP3_ZC3H11A	0.578741	-0.5469	-1.85762	0.763819	-0.817799	0.413472	NS
EIF4A1_PDCD4	4.0295	1.39364	-1.94834	4.73562	0.817325	0.413742	NS
SRCAP_TCF12	1.42726	0.355758	-0.500718	1.21223	0.814119	0.415577	NS
EEF1D_EEF1G	17.9774	2.88911	-4.0676	9.84583	0.81397	0.415662	NS
GPS2_NCOA2	0.872517	-0.136373	-0.464772	0.192025	-0.81391	0.415696	NS
NDUFA13_NDUFB10	0.574691	-0.553923	-1.89116	0.783316	-0.811874	0.416864	NS
SARNP_THOC7	0.637161	-0.450733	-1.54007	0.638605	-0.81097	0.417383	NS
RPL38_RPS10	9.02598	2.20011	-3.13055	7.53077	0.80893	0.418556	NS
NDUFA1_NDUFA11	0.64401	-0.440042	-1.50854	0.628452	-0.807179	0.419563	NS
NUP214_ZC3H11A	1.941	0.663201	-0.948622	2.27502	0.806447	0.419985	NS
RPL10_RPS10	0.144582	-1.93391	-6.64495	2.77713	-0.804578	0.421063	NS
EIF4A1_PTBP1	0.163198	-1.81279	-6.22965	2.60406	-0.804419	0.421155	NS
ACAD11_ACADM	1.24369	0.218083	-0.314192	0.750357	0.803034	0.421955	NS
ACTR2_ARPC1B	1.51832	0.417601	-0.60169	1.43689	0.802993	0.421979	NS
GTF2H4_RNGTT	1.34409	0.295717	-0.42698	1.01841	0.801988	0.42256	NS
RPL36A_SEC11A	2.34185	0.85094	-1.22918	2.93106	0.801787	0.422676	NS
ATP6V0C_SEH1L	0.65943	-0.41638	-1.43487	0.602111	-0.801273	0.422973	NS
RPL17_RPS26	0.814209	-0.205539	-0.708525	0.297448	-0.800912	0.423183	NS
ARPC1B_NCK1	0.726722	-0.319211	-1.10094	0.462518	-0.800332	0.423519	NS
RPLP0_RPS10	0.151802	-1.88518	-6.50322	2.73286	-0.800099	0.423654	NS
RPS10_RPS15	2.47593	0.906616	-1.31825	3.13149	0.79867	0.424482	NS
BCL9_SRCAP	1.36199	0.308945	-0.450245	1.06813	0.797588	0.425109	NS
NUP93_ZC3H11A	0.682991	-0.381273	-1.32035	0.557805	-0.795761	0.426171	NS
DDX47_EXOSC5	0.743396	-0.296526	-1.02719	0.434139	-0.795413	0.426373	NS
RPL17_RPL36AL	2.56534	0.942092	-1.39265	3.27683	0.790865	0.429023	NS
DDX47_WDR46	0.660863	-0.414209	-1.44142	0.613001	-0.79033	0.429335	NS
EIF3M_RPS10	0.395134	-0.92853	-3.234	1.37694	-0.789376	0.429892	NS
POLR2F_SNRPD1	0.714208	-0.336581	-1.17453	0.501366	-0.787265	0.431127	NS
RPL36A_SSR2	0.408936	-0.894198	-3.12555	1.33716	-0.78544	0.432196	NS
NDUFV2_SDHB	0.65794	-0.418642	-1.46592	0.628636	-0.783482	0.433344	NS
CNOT7_EIF4A1	1.98128	0.683743	-1.02793	2.39542	0.782923	0.433672	NS
PRPF4_SNRPN	0.525262	-0.643859	-2.25624	0.968527	-0.782654	0.43383	NS
PPIH_SNRPN	1.44752	0.369851	-0.557311	1.29701	0.781842	0.434307	NS
ATG7_GABARAP	1.62921	0.488097	-0.736513	1.71271	0.781189	0.434691	NS
ERCC5_POLR2B	1.4746	0.388387	-0.588305	1.36508	0.779391	0.435749	NS
EIF4E_RPS10	0.594022	-0.520839	-1.83181	0.790136	-0.778677	0.43617	NS
RPL36A_SRP72	0.58092	-0.543142	-1.91027	0.823985	-0.778669	0.436175	NS
EIF4A1_RPS6KB1	0.574691	-0.553923	-1.9497	0.841856	-0.777824	0.436673	NS
RPS10_RPS8	6.21026	1.8262	-2.78131	6.43371	0.776839	0.437254	NS
RNPS1_RPL36A	2.19665	0.786935	-1.20315	2.77702	0.775026	0.438324	NS
EIF4A1_RPSA	0.260743	-1.34422	-4.74627	2.05783	-0.77442	0.438682	NS
HDAC10_NCOR1	1.2456	0.219614	-0.339998	0.779226	0.769167	0.441794	NS
RPS10_RPS20	6.68061	1.89921	-2.96193	6.76035	0.765742	0.44383	NS
RPL31_RPS10	0.144827	-1.93222	-6.87993	3.0155	-0.765419	0.444022	NS
CASP2_EIF4A1	1.66294	0.508585	-0.796204	1.81337	0.763961	0.444891	NS
RPL36A_RPL39	0.800512	-0.222504	-0.793415	0.348408	-0.763865	0.444948	NS
EIF4A3_RPL36A	0.594603	-0.519862	-1.85528	0.815556	-0.76299	0.445469	NS
MRPL38_MRPL45	0.714698	-0.335895	-1.1998	0.528007	-0.762057	0.446026	NS
EIF4A1_EIF4A3	1.85965	0.620387	-0.977544	2.21832	0.760944	0.44669	NS
DCLRE1C_RAD50	0.759618	-0.274939	-0.985018	0.43514	-0.758889	0.447919	NS
RPL36A_RPS5	0.318236	-1.14496	-4.10232	1.8124	-0.758813	0.447965	NS
ATP6V1E1_RNASEK	0.595183	-0.518886	-1.86006	0.822286	-0.75829	0.448277	NS
ARPC1B_HIP1	0.836305	-0.178762	-0.641633	0.28411	-0.756941	0.449085	NS
SNRPN_SYF2	0.646621	-0.435994	-1.56923	0.697244	-0.754063	0.450811	NS
RPS10_SSR1	2.14112	0.761331	-1.22282	2.74548	0.752049	0.452021	NS
RPL7_RPS10	0.673694	-0.394979	-1.42436	0.634402	-0.752049	0.452022	NS
GLE1_ZC3H11A	1.74409	0.556236	-0.894124	2.0066	0.751677	0.452245	NS
EIF4A1_RPS3	0.11708	-2.1449	-7.74067	3.45087	-0.75127	0.45249	NS
ILK_MYL9	0.458799	-0.779143	-2.81625	1.25796	-0.749638	0.453473	NS
RPL35A_RPS10	0.0973473	-2.32947	-8.44041	3.78147	-0.747132	0.454984	NS
DDX47_NOC4L	1.41418	0.346551	-0.563854	1.25696	0.746071	0.455624	NS
RPS10_RPS26	0.825451	-0.191825	-0.697106	0.313455	-0.744083	0.456826	NS
NDUFA13_NDUFS3	1.92921	0.657112	-1.07432	2.38854	0.743846	0.45697	NS
EIF4A1_RPS6	0.123491	-2.09159	-7.61503	3.43186	-0.742188	0.457973	NS
RPS10_RPS11	5.30899	1.6694	-2.75739	6.09619	0.739129	0.459829	NS
EIF4A1_RPS24	0.125177	-2.07802	-7.60825	3.45221	-0.736471	0.461444	NS
GPS2_KDM1A	0.687709	-0.374389	-1.37114	0.622366	-0.736178	0.461622	NS
COPS7B_SPSB3	1.49401	0.401461	-0.672178	1.4751	0.732881	0.463631	NS
POLR2J_U2AF1	1.38803	0.327882	-0.549733	1.2055	0.732254	0.464014	NS
NUP85_ZC3H11A	1.4434	0.367004	-0.617436	1.35144	0.730684	0.464972	NS
ACTR3_ARPC1B	1.53814	0.430577	-0.728451	1.5896	0.728123	0.466538	NS
GTF2H4_TAF1B	1.34207	0.294211	-0.500407	1.08883	0.725685	0.468032	NS
NDUFA1_NDUFS7	0.683551	-0.380454	-1.40805	0.647139	-0.725652	0.468052	NS
RPL14_RPL36A	2.66051	0.978519	-1.66949	3.62652	0.724266	0.468902	NS
RPL36A_TRAM1	1.92554	0.655208	-1.11962	2.43004	0.723554	0.46934	NS
CTNNB1_ILK	2.14836	0.764703	-1.31349	2.8429	0.721197	0.470788	NS
CAND1_SPSB3	0.821811	-0.196245	-0.73161	0.33912	-0.71845	0.47248	NS
LRRC49_NICN1	0.691666	-0.368652	-1.37451	0.637209	-0.718335	0.472551	NS
EIF4A1_EIF4E3	0.724914	-0.321703	-1.20255	0.559143	-0.715818	0.474103	NS
ATP6V0C_ATP6V0E1	0.532127	-0.630874	-2.3717	1.10995	-0.710289	0.477525	NS
EIF3I_RPS10	4.10772	1.41287	-2.5001	5.32584	0.70769	0.479138	NS
COPS3_GTF2H4	0.757818	-0.277312	-1.04547	0.490848	-0.707562	0.479217	NS
IMPACT_RPS10	1.35577	0.304371	-0.542671	1.15141	0.704282	0.481257	NS
EIF4A1_RPS12	0.143588	-1.94081	-7.34562	3.464	-0.703801	0.481557	NS
RPL14_RPL17	5.3023	1.66814	-2.98517	6.32145	0.702618	0.482294	NS
RPS10_RPS14	5.51924	1.70824	-3.07106	6.48754	0.700539	0.483591	NS
BYSL_RPS10	1.76657	0.569039	-1.02731	2.16539	0.698653	0.484769	NS
DDX47_DDX52	1.46776	0.383739	-0.693972	1.46145	0.697882	0.485251	NS
EIF3CL_EIF3H	0.303159	-1.1935	-4.5456	2.15861	-0.697833	0.485281	NS
CPSF3_ZC3H11A	1.38261	0.323973	-0.586163	1.23411	0.697671	0.485383	NS
CSNK2A1_CSNK2B	1.40554	0.340423	-0.616307	1.29715	0.697393	0.485557	NS
RPL17_RPS5	0.152173	-1.88274	-7.17513	3.40965	-0.697245	0.485649	NS
EIF2S3_EIF3CL	0.362986	-1.01339	-3.87971	1.85293	-0.692946	0.488343	NS
CWC27_SNRPN	1.52237	0.420267	-0.772097	1.61263	0.69082	0.489679	NS
RPL17_RPS21	0.276957	-1.28389	-4.92835	2.36056	-0.690468	0.4899	NS
EEF2_EIF4A1	4.68497	1.54436	-2.84232	5.93104	0.690019	0.490182	NS
ACTR3B_ARPC1B	1.39943	0.336067	-0.618559	1.29069	0.689986	0.490203	NS
ATP6V0D1_RNASEK	0.678314	-0.388146	-1.49109	0.714796	-0.689748	0.490353	NS
CSNK1D_RPS10	0.345568	-1.06257	-4.08328	1.95814	-0.689438	0.490548	NS
GPS1_SPSB3	0.669848	-0.400705	-1.54229	0.740882	-0.687961	0.491477	NS
SF3B3_SNRPN	1.6961	0.528332	-0.981818	2.03848	0.685701	0.492901	NS
RPL17_RPS13	6.94215	1.93761	-3.60181	7.47703	0.685568	0.492985	NS
RPL41_RPS10	0.206886	-1.57559	-6.08099	2.92981	-0.685421	0.493078	NS
THOC3_ZC3H11A	1.22613	0.203866	-0.37956	0.787292	0.684868	0.493427	NS
RPL36A_SRP14	2.441	0.892409	-1.6648	3.44962	0.683983	0.493986	NS
RPL36A_RPL37	0.325053	-1.12377	-4.35725	2.10971	-0.681168	0.495765	NS
RPL17_RPS12	8.5961	2.15131	-4.05368	8.3563	0.679532	0.496801	NS
NDUFA13_NDUFS8	1.50872	0.411264	-0.775268	1.5978	0.679343	0.49692	NS
ATP6V0C_ATP6V1B2	0.680934	-0.38429	-1.49485	0.726271	-0.67821	0.497638	NS
ARL13B_CHMP4A	0.837234	-0.177652	-0.691185	0.33588	-0.678033	0.497751	NS
ZFX_ZNF410	0.793344	-0.231499	-0.901855	0.438858	-0.676848	0.498503	NS
ERCC5_ZNF830	1.53969	0.431582	-0.818909	1.68207	0.676442	0.49876	NS
RPL32_RPS10	0.160187	-1.83141	-7.13921	3.47638	-0.676271	0.498869	NS
ATP6V0C_TCIRG1	0.790664	-0.234882	-0.916424	0.44666	-0.675469	0.499378	NS
RPL36A_SRP9	2.03944	0.712676	-1.37213	2.79748	0.670001	0.502857	NS
RPL10A_RPL17	0.112741	-2.18266	-8.57793	4.21261	-0.668921	0.503546	NS
EIF4A1_RPS4X	0.150883	-1.89125	-7.43957	3.65708	-0.66809	0.504076	NS
RPL17_SRP72	0.598561	-0.513226	-2.01921	0.992755	-0.66794	0.504172	NS
NDUFA13_NDUFS2	0.62972	-0.462479	-1.82421	0.899252	-0.665655	0.505632	NS
ATP6V0C_ATP6V1C1	0.70431	-0.350537	-1.38431	0.683238	-0.664594	0.50631	NS
IRF9_STAT1	1.35125	0.301028	-0.59055	1.19261	0.661752	0.50813	NS
EIF3H_RPS10	4.52431	1.50946	-2.98205	6.00098	0.658686	0.510098	NS
SRPK2_U2AF1	1.24321	0.217696	-0.431059	0.866451	0.657685	0.510741	NS
RPS10_SMG1	0.758252	-0.276739	-1.10157	0.548087	-0.657592	0.510801	NS
ERCC5_GTF2H1	1.35758	0.305706	-0.610114	1.22153	0.654247	0.512953	NS
RPL21_RPS10	0.709833	-0.342726	-1.37677	0.691316	-0.649616	0.51594	NS
NUP160_ZC3H11A	0.661376	-0.413433	-1.66207	0.8352	-0.648961	0.516364	NS
RPS10_SRP68	1.9493	0.667471	-1.3485	2.68344	0.648927	0.516385	NS
RPL17_RPL39	0.833922	-0.181615	-0.730255	0.367024	-0.648804	0.516465	NS
RPL17_RPL7	1.42718	0.355697	-0.718868	1.43026	0.648778	0.516482	NS
GPS2_PML	0.752256	-0.284679	-1.14835	0.578992	-0.646034	0.518257	NS
RPL17_RPL7A	5.93576	1.781	-3.62874	7.19073	0.64526	0.518759	NS
HSP90AA1_ILK	2.11333	0.748263	-1.52486	3.02139	0.645178	0.518812	NS
DDX47_UTP18	1.48912	0.398188	-0.819742	1.61612	0.640787	0.521661	NS
RPL28_RPS10	0.173865	-1.74948	-7.10156	3.60261	-0.640668	0.521738	NS
MRPL38_MRPS30	0.757903	-0.2772	-1.12618	0.571781	-0.639945	0.522208	NS
RBMX2_SNRPN	1.31797	0.276095	-0.572432	1.12462	0.637737	0.523645	NS
EIF2S1_RPL36A	1.76182	0.566348	-1.17989	2.31259	0.635664	0.524995	NS
COMMD1_SPSB3	0.758301	-0.276675	-1.12983	0.576484	-0.635606	0.525033	NS
CNOT3_EIF4A1	1.58467	0.460379	-0.961256	1.88201	0.63471	0.525617	NS
RPL17_RPL5	5.65759	1.733	-3.63035	7.09634	0.633301	0.526537	NS
NUP43_ZC3H11A	1.56054	0.445035	-0.935302	1.82537	0.631913	0.527444	NS
RPS10_RPS18	4.07066	1.40381	-2.95441	5.76202	0.631316	0.527834	NS
RPL17_SSR1	2.17175	0.775535	-1.64062	3.19169	0.629106	0.52928	NS
EIF3CL_RPS20	7.99194	2.07843	-4.41543	8.5723	0.627308	0.530457	NS
DDX47_RRP9	0.757874	-0.277238	-1.14399	0.589512	-0.626913	0.530717	NS
ATP6V0B_ATP6V0C	0.583586	-0.538564	-2.22561	1.14849	-0.625687	0.53152	NS
EIF3CL_EIF3K	2.31724	0.840378	-1.79423	3.47499	0.625182	0.531852	NS
RPL39_RPS10	1.20466	0.186199	-0.400482	0.77288	0.622048	0.53391	NS
ARHGEF18_PARD3	0.787142	-0.239347	-0.994609	0.515916	-0.621123	0.534519	NS
DDOST_RPL17	0.30196	-1.19746	-4.98151	2.58659	-0.620229	0.535107	NS
GTF2H4_PCNA	1.27214	0.240702	-0.523691	1.0051	0.617178	0.537117	NS
RPL36A_RPS3A	0.4083	-0.895752	-3.74318	1.95167	-0.616572	0.537517	NS
EIF2S3_RPL17	0.35007	-1.04962	-4.38768	2.28843	-0.616295	0.5377	NS
EIF4A1_GSPT1	0.546644	-0.603958	-2.53086	1.32294	-0.614322	0.539003	NS
RNF113A_SNRPN	1.36147	0.308568	-0.67705	1.29419	0.613608	0.539475	NS
RPL17_RPS4X	4.92731	1.59479	-3.50294	6.69253	0.613162	0.539769	NS
BOP1_DDX47	0.806064	-0.215592	-0.905496	0.474311	-0.612481	0.540219	NS
RNPS1_RPL17	2.08779	0.736107	-1.6201	3.09232	0.612315	0.540329	NS
RPL29_RPS10	0.152574	-1.88011	-7.89977	4.13955	-0.612151	0.540438	NS
ERCC4_ERCC5	0.720694	-0.327541	-1.38729	0.732207	-0.605774	0.544665	NS
RPL17_RPL37A	6.00141	1.79199	-4.02299	7.60698	0.603999	0.545845	NS
RPS10_SMG6	1.48724	0.396923	-0.892965	1.68681	0.603118	0.54643	NS
RPL36A_SRP54	1.41796	0.349222	-0.787892	1.48634	0.60193	0.547221	NS
EIF3A_EIF4A1	1.8339	0.606447	-1.36825	2.58115	0.601922	0.547226	NS
DDX47_EXOSC3	1.71902	0.541757	-1.22597	2.30949	0.600671	0.548059	NS
FANCA_TOP3B	1.37493	0.318403	-0.724461	1.36127	0.598408	0.549568	NS
CPSF6_ZC3H11A	2.07366	0.729316	-1.65988	3.11851	0.598291	0.549646	NS
PSMA6_TRAF3	0.73478	-0.308185	-1.31868	0.702311	-0.597757	0.550002	NS
GPKOW_SNRPN	0.661731	-0.412896	-1.76967	0.943876	-0.596461	0.550868	NS
RPL36A_UBA52	0.394847	-0.929258	-3.98315	2.12464	-0.59639	0.550915	NS
RPL17_RPS3	5.34626	1.6764	-3.85232	7.20511	0.594294	0.552316	NS
GPS2_KDM3A	0.816295	-0.20298	-0.873096	0.467137	-0.593678	0.552728	NS
MAGOHB_SNRPN	1.41843	0.349548	-0.806755	1.50585	0.592493	0.553521	NS
RBM8A_ZC3H11A	0.642263	-0.442758	-1.91803	1.03252	-0.588222	0.556383	NS
GABARAP_UBQLN1	1.5669	0.449102	-1.04747	1.94568	0.588159	0.556425	NS
GTF2F1_SNRPN	1.56637	0.44876	-1.04674	1.94426	0.588132	0.556444	NS
LSM5_SNRPN	1.32546	0.281757	-0.660931	1.22444	0.585807	0.558005	NS
RPL17_RPS24	5.00131	1.6097	-3.78998	7.00938	0.584285	0.559028	NS
GRSF1_RPL36A	0.572287	-0.558115	-2.43334	1.31711	-0.583335	0.559668	NS
EIF2S2_EIF4A1	1.60867	0.475405	-1.12323	2.07404	0.582859	0.559989	NS
CLP1_SNRPN	0.555137	-0.58854	-2.56897	1.39189	-0.582458	0.560258	NS
GTPBP4_RPL36A	1.64267	0.496326	-1.17468	2.16733	0.582153	0.560464	NS
EIF4A1_RPS27A	0.242025	-1.41871	-6.19713	3.3597	-0.581914	0.560625	NS
ARPC1B_BAIAP2	1.24837	0.221837	-0.525713	0.969386	0.581623	0.56082	NS
EEF1G_SNW1	0.552861	-0.592648	-2.59096	1.40567	-0.581274	0.561056	NS
FAU_RPL17	0.259713	-1.34818	-5.90117	3.20481	-0.580362	0.561671	NS
CDK5RAP3_DDRGK1	1.32554	0.281823	-0.673757	1.2374	0.578039	0.563238	NS
ATP6V0C_ATP6V1A	0.714264	-0.336503	-1.479	0.805998	-0.577272	0.563756	NS
CWC22_U2AF1	1.36053	0.307873	-0.738128	1.35387	0.576883	0.564019	NS
ARPC1B_WIPF1	0.832882	-0.182864	-0.805071	0.439344	-0.576023	0.564599	NS
BUD13_U2AF1	1.44187	0.365944	-0.882048	1.61393	0.574713	0.565486	NS
GPS2_NCOR2	0.775173	-0.254669	-1.1233	0.613959	-0.574633	0.565539	NS
RPL17_RPL4	4.4778	1.49913	-3.66087	6.65913	0.569427	0.569067	NS
ATG5_GABARAP	0.602108	-0.507318	-2.25482	1.24018	-0.568998	0.569357	NS
RPL17_RPS6	4.57745	1.52114	-3.72267	6.76496	0.568553	0.56966	NS
BBS1_BBS9	1.27486	0.242836	-0.59613	1.0818	0.567306	0.570507	NS
RPL17_RPL23	4.98851	1.60714	-3.94919	7.16347	0.566909	0.570776	NS
RPL17_RPL3	4.3934	1.4801	-3.65729	6.6175	0.564673	0.572296	NS
ITCH_PSMA6	1.25105	0.223982	-0.55422	1.00218	0.564117	0.572674	NS
NDUFS3_NDUFV2	1.59165	0.464773	-1.15427	2.08382	0.562639	0.573681	NS
NCBP1_U2AF1	1.2578	0.229361	-0.570744	1.02947	0.561851	0.574218	NS
THOC2_ZC3H11A	0.682739	-0.381643	-1.71357	0.950281	-0.561599	0.574389	NS
EIF3D_EIF4A1	2.20077	0.788807	-1.96429	3.54191	0.561561	0.574415	NS
ATP6V0C_ATP6V1F	0.699389	-0.357548	-1.60597	0.890874	-0.561333	0.574571	NS
DHX35_SNRPN	1.4219	0.351993	-0.878709	1.58269	0.560569	0.575091	NS
THOC6_ZC3H11A	1.1991	0.181569	-0.454715	0.817852	0.559292	0.575963	NS
EIF4A1_RPS27	0.917482	-0.0861219	-0.388277	0.216033	-0.55864	0.576407	NS
ILK_LIMS1	0.831005	-0.18512	-0.835546	0.465307	-0.557831	0.57696	NS
CDC37_ILK	2.11819	0.750563	-1.88749	3.38862	0.557637	0.577093	NS
CPSF4_ZC3H11A	1.26734	0.236919	-0.598554	1.07239	0.555797	0.57835	NS
ZNF337_ZNF430	1.13557	0.127136	-0.321398	0.575671	0.555549	0.578519	NS
EIF4A1_EIF4G2	0.259998	-1.34708	-6.11217	3.41801	-0.554078	0.579525	NS
NDUFA13_NDUFB5	0.711746	-0.340034	-1.54431	0.864242	-0.553406	0.579985	NS
EEF1G_YWHAE	20.2475	3.00803	-7.64736	13.6634	0.5533	0.580058	NS
RPL36A_RPS19	0.446153	-0.807094	-3.67844	2.06425	-0.550918	0.58169	NS
DAP3_MRPL38	1.29738	0.260344	-0.66971	1.1904	0.548639	0.583253	NS
NCBP2_RPL36A	1.70894	0.535875	-1.38113	2.45288	0.547883	0.583772	NS
RPL15_RPL17	0.234706	-1.44942	-6.64193	3.74308	-0.547099	0.584311	NS
CWC15_SNRPN	0.739289	-0.302067	-1.38898	0.784845	-0.544699	0.58596	NS
RPS10_RPS23	3.69298	1.30643	-3.40915	6.02202	0.543	0.58713	NS
RPS10_RPSA	3.33682	1.20502	-3.15076	5.5608	0.542221	0.587666	NS
RPS10_RPS29	0.288459	-1.2432	-5.73973	3.25333	-0.541891	0.587893	NS
AAAS_ZC3H11A	1.29882	0.261457	-0.685552	1.20847	0.541121	0.588424	NS
RPL36A_RPS25	0.429914	-0.844169	-3.90538	2.21705	-0.540485	0.588863	NS
ILK_ITGAV	0.746307	-0.292618	-1.35388	0.768645	-0.540414	0.588911	NS
ILK_RAC1	0.495932	-0.701316	-3.24691	1.84428	-0.539973	0.589215	NS
RPP30_RPS10	0.604649	-0.503108	-2.33217	1.32596	-0.539114	0.589808	NS
MAGOH_U2AF1	1.47149	0.386279	-1.01808	1.79064	0.539101	0.589817	NS
GTF2F2_SNRPN	0.754877	-0.281201	-1.30362	0.741215	-0.53906	0.589846	NS
PPP2CA_RPL36A	0.591405	-0.525255	-2.44	1.38949	-0.537659	0.590812	NS
NUP205_ZC3H11A	0.697367	-0.360444	-1.67861	0.957721	-0.53594	0.592	NS
DNAJC8_SNRPN	0.515107	-0.663381	-3.09363	1.76686	-0.535009	0.592644	NS
SNRPG_SNRPN	0.797923	-0.225743	-1.05576	0.604268	-0.533063	0.59399	NS
CPSF2_U2AF1	1.22299	0.201301	-0.539662	0.942264	0.532472	0.594399	NS
RPL36A_RPS27	0.922876	-0.0802606	-0.378385	0.217864	-0.527658	0.597737	NS
ERCC5_RFC2	0.773973	-0.256219	-1.2093	0.696863	-0.5269	0.598263	NS
RPL17_RPL26L1	0.750191	-0.287428	-1.35721	0.782356	-0.5266	0.598471	NS
ZNF410_ZNF418	0.657532	-0.419262	-1.98273	1.14421	-0.525586	0.599176	NS
DDX47_EXOSC4	1.21367	0.193653	-0.529697	0.917002	0.524715	0.599781	NS
SEC13_ZC3H11A	0.701641	-0.354334	-1.6792	0.970535	-0.524189	0.600147	NS
RPL17_RPL21	1.31672	0.275143	-0.754048	1.30433	0.523974	0.600296	NS
CCT7_EEF1G	0.294065	-1.22396	-5.80879	3.36088	-0.523226	0.600817	NS
RPS10_ZC3H15	1.40483	0.339915	-0.934354	1.61418	0.522826	0.601096	NS
MRPL18_MRPL38	0.750691	-0.286761	-1.36259	0.789067	-0.522427	0.601373	NS
NDUFB8_NDUFS4	0.751672	-0.285455	-1.36083	0.789922	-0.520266	0.602878	NS
RPL13A_RPL17	0.233646	-1.45395	-6.93865	4.03075	-0.51957	0.603363	NS
CWF19L2_SNRPN	0.730027	-0.314673	-1.50198	0.872634	-0.519451	0.603446	NS
RPL36_RPL36A	1.79701	0.586124	-1.6265	2.79875	0.519194	0.603625	NS
ARL6IP4_ZRANB2	1.26368	0.23403	-0.649741	1.1178	0.519015	0.60375	NS
EIF4A1_RPS13	0.308885	-1.17479	-5.63921	3.28964	-0.515753	0.606027	NS
PPIH_U2AF1L4	1.34678	0.297713	-0.834579	1.43001	0.515333	0.60632	NS
ETF1_RPS10	0.681682	-0.383192	-1.84145	1.07507	-0.515027	0.606534	NS
CDC40_SNRPN	1.31506	0.273886	-0.768702	1.31647	0.514878	0.606638	NS
DDX47_UTP15	1.49143	0.399736	-1.12422	1.92369	0.514103	0.60718	NS
RPL17_RPL27A	4.47365	1.49821	-4.2268	7.22321	0.512913	0.608012	NS
ATG3_GABARAP	0.660228	-0.415171	-2.00233	1.17199	-0.512689	0.608169	NS
EIF4A1_RPS17	0.26073	-1.34427	-6.50953	3.821	-0.510084	0.609993	NS
ILK_IQGAP1	1.50725	0.410287	-1.17061	1.99119	0.508665	0.610987	NS
GABARAP_SQSTM1	0.170648	-1.76815	-8.60202	5.06572	-0.507109	0.612078	NS
MRPL37_MRPL38	1.3423	0.294386	-0.844585	1.43336	0.506585	0.612446	NS
RPS10_RPS16	3.89246	1.35904	-3.90754	6.62562	0.505769	0.613019	NS
EEF1A1_RPL17	0.271874	-1.30242	-6.35059	3.74576	-0.505665	0.613092	NS
PABPC1_RPL36A	1.87768	0.630038	-1.82015	3.08022	0.503983	0.614273	NS
EIF4A1_PSMC4	0.668991	-0.401985	-1.96989	1.16592	-0.502502	0.615314	NS
ZNF100_ZNF410	1.23436	0.21055	-0.610847	1.03195	0.502401	0.615386	NS
RPL36A_RPS16	0.456925	-0.783236	-3.84452	2.27805	-0.501461	0.616047	NS
ZNF410_ZNF561	0.735083	-0.307772	-1.51474	0.899201	-0.499781	0.61723	NS
KRR1_RPS10	1.30141	0.263451	-0.770265	1.29717	0.499513	0.617418	NS
NUP133_ZC3H11A	1.38441	0.325277	-0.96022	1.61077	0.495941	0.619936	NS
PPP2R1A_RPL17	0.327916	-1.115	-5.53183	3.30183	-0.49478	0.620756	NS
GPS2_TGS1	0.828692	-0.187906	-0.932758	0.556945	-0.494447	0.62099	NS
ZNF256_ZNF410	1.50958	0.411834	-1.22296	2.04663	0.49375	0.621483	NS
RPL17_RPS27	0.926504	-0.0763364	-0.380365	0.227692	-0.492114	0.622639	NS
ZBTB24_ZNF410	1.36849	0.313706	-0.935916	1.56333	0.492031	0.622697	NS
NDUFA13_NDUFS5	1.62122	0.483179	-1.44184	2.4082	0.49195	0.622754	NS
RPL27_RPS10	0.269298	-1.31194	-6.54238	3.91851	-0.491611	0.622994	NS
PPP2R2A_RPS10	0.742205	-0.29813	-1.49116	0.894905	-0.489779	0.62429	NS
RPL17_RPLP1	3.76423	1.32554	-3.99452	6.6456	0.488343	0.625307	NS
EIF4A1_FAU	0.32417	-1.12649	-5.64803	3.39506	-0.4883	0.625337	NS
ERCC5_RPA3	1.22713	0.204678	-0.620896	1.03025	0.485919	0.627025	NS
ACTR8_SRCAP	1.47639	0.3896	-1.18703	1.96623	0.484326	0.628154	NS
MRPL33_MRPL38	0.830049	-0.186271	-0.940078	0.567537	-0.48432	0.628159	NS
NCBP1_SNRPN	1.33658	0.290116	-0.884878	1.46511	0.483932	0.628434	NS
RPL17_RPL34	3.48786	1.24929	-3.8432	6.34177	0.480818	0.630646	NS
RIOK3_RPS10	1.42463	0.353914	-1.0951	1.80292	0.478712	0.632143	NS
CHMP4B_GABARAP	3.17987	1.15684	-3.60186	5.91554	0.476468	0.633741	NS
RPL17_SSR2	0.576791	-0.550275	-2.81518	1.71463	-0.476187	0.633941	NS
DDX47_NIP7	0.687515	-0.374672	-1.9215	1.17216	-0.474742	0.634971	NS
RPL30_RPL36A	1.88445	0.633635	-2.00105	3.26832	0.471366	0.637379	NS
EIF3D_RPS10	0.473576	-0.747444	-3.85618	2.36129	-0.471241	0.637469	NS
NICN1_TTLL1	0.773375	-0.256991	-1.3348	0.820818	-0.467331	0.640263	NS
RPL36A_UPF2	0.808008	-0.213183	-1.10816	0.681791	-0.466864	0.640597	NS
RPL36A_RPS2	0.542658	-0.611275	-3.19255	1.97	-0.464142	0.642546	NS
CPSF2_SNRPN	1.2884	0.253403	-0.81725	1.32406	0.463886	0.64273	NS
NDUFS6_NDUFV2	1.28249	0.2488	-0.802412	1.30001	0.463883	0.642732	NS
EIF3G_RPS10	1.93513	0.660172	-2.13633	3.45667	0.46269	0.643587	NS
RPS10_RPS27	0.930144	-0.0724156	-0.379395	0.234564	-0.46235	0.64383	NS
GTF2H4_TAF1	0.879562	-0.128331	-0.672508	0.415847	-0.462209	0.643931	NS
EIF4A1_PAIP1	0.707849	-0.345525	-1.81652	1.12547	-0.460379	0.645244	NS
RPL17_SMG6	1.36593	0.311834	-1.01583	1.6395	0.460345	0.645269	NS
CHMP7_GABARAP	1.46764	0.383653	-1.254	2.02131	0.45916	0.64612	NS
RPL17_RPS3A	0.240648	-1.42442	-7.52712	4.67828	-0.457472	0.647332	NS
GPS2_TRIM28	0.769255	-0.262333	-1.39294	0.868269	-0.454769	0.649275	NS
RPL17_SRP68	1.69796	0.529425	-1.75385	2.8127	0.454459	0.649499	NS
PNO1_RPS10	0.716503	-0.333373	-1.77156	1.10481	-0.454322	0.649597	NS
SNRPF_SNRPN	0.839197	-0.17531	-0.931778	0.581158	-0.454218	0.649672	NS
DDX47_RBM28	1.39779	0.334892	-1.11253	1.78231	0.453479	0.650204	NS
PPP1R8_U2AF1	1.33652	0.290067	-0.964984	1.54512	0.452986	0.650559	NS
CWF19L2_POLR2F	1.14244	0.133165	-0.447362	0.713693	0.44959	0.653006	NS
EEF2_RPL17	0.318589	-1.14385	-6.15413	3.86642	-0.447463	0.654541	NS
ERCC5_POLR2J	1.17656	0.162595	-0.549966	0.875156	0.447232	0.654708	NS
POLR2B_SNRPN	1.30838	0.268788	-0.909605	1.44718	0.447061	0.654831	NS
DTNBP1_TXNDC5	0.841677	-0.172359	-0.936382	0.591664	-0.442156	0.658377	NS
ARL6IP4_CPSF6	0.781034	-0.247136	-1.34839	0.854122	-0.439841	0.660053	NS
ATG4B_GABARAP	0.789563	-0.236276	-1.29218	0.819628	-0.438574	0.66097	NS
RPL17_RPL8	3.16064	1.15077	-3.99349	6.29504	0.438444	0.661064	NS
RPL27_RPL36A	1.76994	0.570948	-1.98217	3.12407	0.438302	0.661167	NS
RPS10_RPS25	3.13889	1.14387	-3.98119	6.26892	0.437448	0.661787	NS
RPL17_RPL19	3.21586	1.1681	-4.06643	6.40262	0.43737	0.661843	NS
GABARAP_PIK3R4	1.22481	0.202786	-0.708115	1.11369	0.43633	0.662598	NS
EIF1_EIF4A1	2.76154	1.01579	-3.55714	5.58872	0.435369	0.663294	NS
RPS10_RPS2	3.01807	1.10462	-3.8706	6.07984	0.435158	0.663447	NS
SNRNP40_SNRPN	0.727377	-0.31831	-1.75419	1.11757	-0.43449	0.663933	NS
PRCC_SNRPN	1.36131	0.308447	-1.08504	1.70194	0.433834	0.664409	NS
MRPL38_MRPS35	0.834403	-0.181038	-0.999943	0.637866	-0.433297	0.664799	NS
MRPL17_MRPL38	0.753699	-0.282762	-1.56429	0.998768	-0.432455	0.665411	NS
PSMA6_SUFU	0.808464	-0.212619	-1.18133	0.756092	-0.430185	0.667061	NS
RPL26L1_RPS10	1.29055	0.255071	-0.909565	1.41971	0.429259	0.667735	NS
RPS10_RSL24D1	1.52688	0.423228	-1.51664	2.3631	0.427611	0.668934	NS
RPL36A_SECISBP2	0.771001	-0.260066	-1.45562	0.935492	-0.426345	0.669856	NS
RPS10_SRP72	0.757665	-0.277514	-1.55635	1.00132	-0.425323	0.670601	NS
SNRPD3_SNRPN	1.2697	0.238778	-0.866519	1.34407	0.423412	0.671995	NS
SART1_SNRPN	1.30286	0.264564	-0.962547	1.49168	0.422567	0.672611	NS
MRPL38_MRPS22	1.24577	0.219758	-0.801685	1.2412	0.421675	0.673262	NS
RPL12_RPL17	0.306184	-1.18357	-6.70444	4.33731	-0.420178	0.674355	NS
WDR33_ZC3H11A	1.53959	0.431515	-1.59673	2.45976	0.416988	0.676687	NS
EIF5_RPS10	1.41148	0.344636	-1.27747	1.96674	0.416419	0.677104	NS
SNIP1_SNRPN	0.737707	-0.304208	-1.73755	1.12913	-0.415977	0.677427	NS
PDIA4_TXNDC5	0.70648	-0.34746	-1.98568	1.29076	-0.4157	0.67763	NS
RPL13_RPL17	0.333573	-1.09789	-6.28145	4.08567	-0.415126	0.67805	NS
RPS10_RPS19	3.4542	1.23959	-4.63483	7.11401	0.413582	0.67918	NS
RPL29_RPL36A	1.72168	0.543299	-2.03153	3.11812	0.413561	0.679196	NS
NDUFA1_NDUFV2	0.735721	-0.306904	-1.76308	1.14927	-0.413081	0.679547	NS
EIF2S2_RPL36A	1.36771	0.313135	-1.17967	1.80594	0.411127	0.680979	NS
CHD9_GPS2	1.11256	0.106667	-0.402846	0.616181	0.410321	0.68157	NS
ILK_RICTOR	0.852961	-0.159042	-0.920329	0.602246	-0.40946	0.682202	NS
RPL30_RPS10	0.355062	-1.03546	-5.99416	3.92323	-0.409275	0.682338	NS
MRPL38_MRPS34	0.750457	-0.287073	-1.66537	1.09123	-0.408222	0.683111	NS
RPL17_RPS15	1.48493	0.395368	-1.50887	2.2996	0.406939	0.684053	NS
CASC3_RPL36A	1.33594	0.289638	-1.10645	1.68572	0.406623	0.684285	NS
EEFSEC_RPL36A	1.30631	0.267209	-1.02306	1.55748	0.405899	0.684817	NS
ELP3_SRCAP	1.30257	0.264336	-1.01944	1.54811	0.403566	0.686532	NS
RPL36A_RPL7	1.21058	0.191096	-0.737198	1.11939	0.403472	0.686601	NS
EIF2S1_RPL17	1.44363	0.367162	-1.4194	2.15372	0.402799	0.687096	NS
ETF1_RPL17	0.700067	-0.356579	-2.09567	1.38252	-0.401865	0.687784	NS
NXT1_ZC3H11A	0.841129	-0.17301	-1.01699	0.670972	-0.401778	0.687847	NS
RPL17_RPL22	3.60999	1.2837	-4.97958	7.54699	0.401708	0.687899	NS
NDUFS4_NDUFS7	1.1915	0.175214	-0.680502	1.03093	0.401317	0.688187	NS
GNAI1_RGS5	1.09748	0.093016	-0.361392	0.547424	0.401199	0.688273	NS
NUP50_ZC3H11A	1.23317	0.209586	-0.8215	1.24067	0.398396	0.690338	NS
ECSIT_NDUFA13	0.843683	-0.169978	-1.00699	0.667032	-0.398026	0.690611	NS
RPL36A_RPL36AL	1.56234	0.446183	-1.75159	2.64396	0.397904	0.690701	NS
CDC5L_U2AF1	1.18512	0.169847	-0.667974	1.00767	0.397333	0.691122	NS
ERCC5_PARP1	1.21369	0.193669	-0.763271	1.15061	0.396665	0.691615	NS
PRPF19_SNRPN	1.41259	0.345428	-1.36605	2.05691	0.395581	0.692414	NS
PHF5A_SNRPN	1.28549	0.25114	-0.994127	1.49641	0.395277	0.692638	NS
ARL13B_UBE2V1	0.880199	-0.127607	-0.762994	0.507781	-0.393626	0.693857	NS
SNRPN_UPF3B	0.817779	-0.201163	-1.20962	0.807299	-0.390963	0.695824	NS
PPP2R2A_RPL17	0.763183	-0.270257	-1.62862	1.08811	-0.389949	0.696574	NS
EIF5B_RPL36A	1.44583	0.368685	-1.48769	2.22506	0.389259	0.697085	NS
DDX47_UTP3	1.34822	0.298783	-1.20829	1.80585	0.388571	0.697594	NS
ARPC1B_FCGR3A	0.921313	-0.081956	-0.495486	0.331574	-0.388438	0.697692	NS
SF3A3_U2AF1	1.28878	0.253699	-1.02664	1.53404	0.388365	0.697746	NS
EIF3CL_RPS5	0.364068	-1.01042	-6.14809	4.12726	-0.385462	0.699895	NS
RNPS1_RPS10	1.69232	0.526099	-2.15642	3.20862	0.38439	0.700689	NS
ERCC5_RFC3	1.25125	0.224143	-0.920378	1.36866	0.38384	0.701097	NS
RPL11_RPL17	0.341626	-1.07404	-6.55981	4.41173	-0.383734	0.701175	NS
TOP3A_TOP3B	1.29618	0.259424	-1.06699	1.58584	0.383336	0.701471	NS
NCBP1_RPL36A	1.26905	0.23827	-0.9801	1.45664	0.383299	0.701498	NS
MRPL38_MRPL51	1.32299	0.279895	-1.15576	1.71555	0.382115	0.702376	NS
RBM8A_RPS10	0.773944	-0.256256	-1.5762	1.06368	-0.380512	0.703566	NS
GSPT1_RPL36A	1.37095	0.315501	-1.31226	1.94326	0.37989	0.704027	NS
ZNF410_ZNF658	1.32842	0.283994	-1.18297	1.75096	0.379435	0.704365	NS
ILK_ITGB1	1.43909	0.364008	-1.52811	2.25613	0.37706	0.706129	NS
DDX47_WDR43	0.785857	-0.24098	-1.4974	1.01544	-0.37592	0.706976	NS
RPL17_RPL37	0.374344	-0.982581	-6.10809	4.14292	-0.375734	0.707115	NS
GTF2H4_LEO1	1.16738	0.154759	-0.654453	0.96397	0.374836	0.707783	NS
ZNF410_ZNF823	1.34557	0.296817	-1.25581	1.84944	0.374688	0.707893	NS
RPL35A_RPL36A	1.66244	0.508289	-2.15787	3.17444	0.373657	0.708659	NS
SNRPG_U2AF1	0.812351	-0.207822	-1.29881	0.883166	-0.373354	0.708885	NS
CSTF2_SNRPN	1.32114	0.278491	-1.19087	1.74785	0.371476	0.710283	NS
RPL17_RPL7L1	0.829473	-0.186965	-1.17344	0.799507	-0.371469	0.710288	NS
EIF4G1_RPL36A	1.49245	0.400419	-1.71628	2.51712	0.37077	0.710809	NS
RPS10_RPS15A	2.73724	1.00695	-4.3348	6.3487	0.369465	0.711781	NS
RPL28_RPL36A	1.61117	0.476962	-2.06452	3.01845	0.367828	0.713002	NS
ILK_RUVBL1	1.2997	0.262135	-1.13667	1.66094	0.367296	0.713398	NS
RPL36A_SPCS1	0.679805	-0.385949	-2.44783	1.67594	-0.366871	0.713715	NS
CPSF1_ZC3H11A	1.20585	0.187185	-0.814136	1.18851	0.366391	0.714073	NS
RPL17_UPF2	0.83269	-0.183094	-1.16349	0.7973	-0.366034	0.71434	NS
ARHGEF6_ILK	0.864033	-0.146144	-0.934599	0.64231	-0.36329	0.716388	NS
MRPL14_MRPS24	0.880726	-0.127009	-0.812918	0.558901	-0.362922	0.716663	NS
RPS10_RPS21	0.396782	-0.924368	-5.93627	4.08753	-0.361485	0.717737	NS
RBMX2_U2AF1L4	1.19354	0.176921	-0.783126	1.13697	0.36119	0.717958	NS
ABCE1_EIF4A1	1.28994	0.254595	-1.13018	1.63937	0.360346	0.718589	NS
NUP88_ZC3H11A	0.817894	-0.201022	-1.29643	0.894386	-0.35968	0.719087	NS
MRPL38_MRPS33	1.17582	0.161963	-0.722194	1.04612	0.359033	0.71957	NS
BBS1_SSTR3	1.12509	0.117859	-0.528731	0.76445	0.357258	0.720899	NS
RPL17_RPLP0	2.62978	0.966899	-4.35299	6.28678	0.356227	0.721671	NS
POLR2J_SNRPN	1.13648	0.127934	-0.576142	0.83201	0.356136	0.721739	NS
RPS10_UBA52	2.71908	1.00029	-4.5079	6.50849	0.355931	0.721892	NS
RPL32_RPL36A	1.60336	0.472102	-2.13765	3.08186	0.354556	0.722922	NS
HSPA8_TXNDC5	0.723272	-0.323971	-2.11545	1.46751	-0.354438	0.72301	NS
BBS1_RAB3IP	0.850661	-0.161741	-1.05722	0.733739	-0.354008	0.723333	NS
RPL36A_UPF3A	0.827503	-0.189343	-1.23819	0.859503	-0.353823	0.723472	NS
RPL17_RPL18	2.5881	0.950926	-4.33824	6.24009	0.352377	0.724555	NS
RPL36A_RPS18	0.589357	-0.528723	-3.4828	2.42535	-0.350796	0.725741	NS
RPS10_UPF1	1.55018	0.43837	-2.01107	2.88781	0.35077	0.725761	NS
CSTF2_ZC3H11A	0.755966	-0.279759	-1.84678	1.28726	-0.34991	0.726406	NS
GPS2_NCOA1	1.10057	0.0958272	-0.440979	0.632633	0.34988	0.726429	NS
EIF4A2_RPS10	0.56014	-0.579568	-3.84352	2.68438	-0.348024	0.727822	NS
RPL36A_UPF3B	0.798885	-0.224538	-1.49489	1.04581	-0.346429	0.72902	NS
NDUFA13_NDUFA3	1.13398	0.125738	-0.585942	0.837417	0.346282	0.729131	NS
ATP6V0E1_RNASEK	0.723249	-0.324001	-2.16093	1.51293	-0.345703	0.729566	NS
THOC1_ZC3H11A	1.17098	0.157841	-0.737235	1.05292	0.345627	0.729623	NS
TOMM22_TOMM6	1.25415	0.226456	-1.06627	1.51919	0.34334	0.731343	NS
RPL36A_RPS14	0.592348	-0.523661	-3.51449	2.46717	-0.343168	0.731472	NS
NCBP2_RPL17	1.49009	0.398838	-1.88386	2.68154	0.342448	0.732014	NS
LSM3_SNRPN	0.846005	-0.16723	-1.12699	0.792526	-0.341509	0.73272	NS
CTNNBL1_SNRPN	1.20441	0.185988	-0.888063	1.26004	0.339397	0.734311	NS
LTV1_RPS10	0.759149	-0.275558	-1.87045	1.31934	-0.338633	0.734886	NS
NDUFA13_NDUFS1	0.903811	-0.101135	-0.686881	0.484611	-0.338409	0.735055	NS
ATP6V0C_ATP6V1G1	0.753447	-0.283096	-1.92288	1.35669	-0.338372	0.735083	NS
RPL36A_RPSA	0.679415	-0.386523	-2.6296	1.85655	-0.337737	0.735561	NS
PQBP1_SNRPN	1.15891	0.14748	-0.712296	1.00726	0.336198	0.736722	NS
NDUFA13_NDUFS6	1.17649	0.162532	-0.793845	1.11891	0.333088	0.739068	NS
ZNF253_ZNF337	0.857474	-0.153765	-1.05867	0.751138	-0.333045	0.7391	NS
RPL10_RPL17	0.389305	-0.943393	-6.49974	4.61295	-0.332776	0.739304	NS
EPC2_SRCAP	1.18845	0.172646	-0.847865	1.19316	0.33158	0.740207	NS
GPS2_MECP2	0.877114	-0.131119	-0.908943	0.646705	-0.330394	0.741102	NS
RPL17_RPS9	2.50933	0.920015	-4.54588	6.38591	0.329899	0.741476	NS
BBS1_CCT8	0.846972	-0.166088	-1.15457	0.822396	-0.329319	0.741915	NS
RPL17_RPLP2	2.14541	0.763332	-3.79562	5.32228	0.328169	0.742784	NS
EIF4A1_EIF4E	1.2417	0.21648	-1.08483	1.51779	0.326052	0.744385	NS
GABARAP_PDCD6IP	0.680362	-0.38513	-2.71729	1.94703	-0.323666	0.746191	NS
EIF4A1_TNKS1BP1	0.644913	-0.438639	-3.10978	2.2325	-0.321854	0.747564	NS
DDX47_EXOSC1	1.17371	0.160167	-0.815336	1.13567	0.321806	0.7476	NS
RPL36A_RPL41	0.610108	-0.49412	-3.51886	2.53062	-0.320178	0.748833	NS
AQR_ERCC5	1.1825	0.167627	-0.859859	1.19511	0.319755	0.749154	NS
RPL21_RPL36A	0.864064	-0.146109	-1.05041	0.758193	-0.316672	0.751492	NS
ERCC5_RFC1	1.15583	0.144815	-0.753185	1.04282	0.316072	0.751948	NS
RPL36A_RPS20	0.617517	-0.482049	-3.4779	2.51381	-0.315369	0.752482	NS
CHMP6_GABARAP	0.870819	-0.138321	-1.00248	0.725834	-0.313722	0.753732	NS
NUP35_ZC3H11A	0.770617	-0.260564	-1.89033	1.3692	-0.313355	0.754011	NS
NUP188_ZC3H11A	1.193	0.176469	-0.928742	1.28168	0.312948	0.75432	NS
SNRPF_U2AF1	0.848097	-0.16476	-1.197	0.867477	-0.312839	0.754403	NS
EIF4A1_EIF4G3	1.20921	0.189965	-1.00089	1.38082	0.312652	0.754545	NS
RPL17_RPS8	2.33528	0.84813	-4.47385	6.17011	0.312347	0.754777	NS
RPL36A_RPN1	1.57961	0.45718	-2.41416	3.32852	0.312069	0.754988	NS
RPL36A_SSR4	0.788401	-0.237748	-1.73233	1.25683	-0.311779	0.755208	NS
RBM10_SNRPN	0.769875	-0.261527	-1.90924	1.38618	-0.311089	0.755733	NS
GPS2_RBBP4	0.900338	-0.104985	-0.7701	0.56013	-0.309369	0.757041	NS
RPL17_RPS11	2.29841	0.832219	-4.4522	6.11664	0.308665	0.757576	NS
CDK7_ERCC5	1.16054	0.148889	-0.803328	1.10111	0.30646	0.759254	NS
DDX47_WDR75	0.818289	-0.20054	-1.48491	1.08383	-0.306025	0.759586	NS
PABPC1_RPL17	2.11248	0.747864	-4.04937	5.5451	0.305548	0.759949	NS
MAGOH_ZC3H11A	0.88456	-0.122665	-0.909677	0.664348	-0.305482	0.759999	NS
ATP6V0C_ATP6V1H	1.20322	0.184999	-1.00562	1.37561	0.304541	0.760716	NS
DDX6_EIF4A1	1.32484	0.281291	-1.54415	2.10673	0.302021	0.762636	NS
SNRPD1_SNRPN	0.851227	-0.161077	-1.21288	0.890722	-0.300157	0.764058	NS
EIF3L_EIF4A1	1.7243	0.544822	-3.02114	4.11079	0.299451	0.764596	NS
GPS2_TBL1XR1	0.873865	-0.134829	-1.01837	0.748708	-0.299093	0.764869	NS
CWC22_SNRPN	1.19781	0.180497	-1.00354	1.36453	0.298781	0.765107	NS
RANBP2_ZC3H11A	1.43315	0.359872	-2.00519	2.72493	0.298232	0.765526	NS
CHMP2B_GABARAP	0.833811	-0.181749	-1.3785	1.015	-0.297657	0.765965	NS
RPL17_SECISBP2	0.804687	-0.217301	-1.65035	1.21575	-0.297201	0.766313	NS
POLR2K_SNRPN	0.82926	-0.187221	-1.42254	1.04809	-0.297047	0.76643	NS
RPL17_RPL24	2.2397	0.806343	-4.53185	6.14454	0.296056	0.767188	NS
MRPL14_MRPL38	0.898411	-0.107127	-0.821283	0.607028	-0.294005	0.768754	NS
DDX47_WDR3	1.17362	0.16009	-0.912911	1.23309	0.292423	0.769963	NS
NSA2_RPS10	1.24318	0.217669	-1.25979	1.69512	0.288755	0.772769	NS
GPS2_KDM1B	0.933339	-0.0689873	-0.543698	0.405724	-0.284832	0.775773	NS
CHMP2A_GABARAP	1.34115	0.293528	-1.72709	2.31414	0.284717	0.775861	NS
ARPC1B_GAB1	0.904441	-0.100438	-0.794437	0.593561	-0.283652	0.776677	NS
MAGOH_RPS10	0.866461	-0.143338	-1.13393	0.847253	-0.283606	0.776712	NS
GPS2_KDM4A	0.898858	-0.10663	-0.844415	0.631156	-0.283268	0.776972	NS
RPL36A_RPS11	0.656315	-0.421114	-3.37035	2.52812	-0.279858	0.779586	NS
CSTF2_SARNP	1.13172	0.123736	-0.744133	0.991604	0.27944	0.779907	NS
CWC15_U2AF1	0.828387	-0.188275	-1.52307	1.14652	-0.276456	0.782198	NS
RPL17_RPL35	1.98738	0.686819	-4.18581	5.55945	0.276266	0.782344	NS
RPL31_RPL36A	1.42624	0.35504	-2.16707	2.87714	0.275906	0.78262	NS
RPL36A_RPS8	0.666137	-0.40626	-3.30199	2.48947	-0.274976	0.783335	NS
RPL17_RPL36	0.649377	-0.431742	-3.51028	2.64679	-0.274871	0.783416	NS
ZNF410_ZNF813	0.823426	-0.194281	-1.58288	1.19432	-0.274222	0.783914	NS
HSPA4_TXNDC5	1.22268	0.201043	-1.24553	1.64761	0.272394	0.785319	NS
ATP6V0C_ATP6V1D	1.2059	0.187225	-1.17362	1.54807	0.269651	0.787429	NS
RPL17_RPL31	2.2088	0.79245	-5.0161	6.601	0.267394	0.789166	NS
CSNK2B_SUPT16H	0.839116	-0.175406	-1.46426	1.11345	-0.26674	0.78967	NS
RPL36A_RPS9	0.679164	-0.386893	-3.23469	2.4609	-0.266275	0.790027	NS
DDX47_NOP2	1.14221	0.132966	-0.870372	1.1363	0.259741	0.795063	NS
RPL17_RPL41	2.08185	0.733256	-4.80488	6.27139	0.259502	0.795248	NS
AXIN1_SRCAP	1.15345	0.14276	-0.940558	1.22608	0.258284	0.796187	NS
MRPL19_MRPL38	1.09553	0.091241	-0.602354	0.784836	0.257829	0.796539	NS
RPL24_RPL36A	1.40129	0.337393	-2.2289	2.90369	0.257678	0.796655	NS
RBM8A_RPL17	0.816158	-0.203148	-1.75031	1.34402	-0.257349	0.796909	NS
RPL17_RPS20	2.02426	0.705203	-4.67077	6.08117	0.257102	0.7971	NS
RPS10_SSR2	0.708241	-0.344971	-3.00196	2.31202	-0.254472	0.799131	NS
NUP205_U2AF1	1.09559	0.0912889	-0.612189	0.794767	0.25434	0.799233	NS
CASC3_RPL17	1.26368	0.234024	-1.57093	2.03898	0.254123	0.799401	NS
EIF4G1_RPS10	0.695239	-0.3635	-3.17409	2.44709	-0.253486	0.799892	NS
RPL17_UBA52	0.533084	-0.629076	-5.50428	4.24613	-0.252906	0.800341	NS
DDB2_ERCC5	0.930161	-0.0723972	-0.633803	0.489008	-0.252751	0.800461	NS
RIOK1_RPS10	0.800856	-0.222074	-1.97344	1.5293	-0.248524	0.803729	NS
RPL36A_RPLP0	0.698819	-0.358364	-3.20234	2.48561	-0.246972	0.80493	NS
BBS1_CCT3	0.875978	-0.132415	-1.18522	0.920393	-0.24651	0.805287	NS
MAGOH_U2AF1L4	0.885793	-0.121272	-1.08665	0.84411	-0.246211	0.805519	NS
RPL18A_RPL36A	1.12507	0.117847	-0.823839	1.05953	0.245279	0.80624	NS
RPL36A_UPF1	0.789418	-0.236459	-2.12602	1.6531	-0.24527	0.806248	NS
RPL7L1_RPS10	1.11899	0.112425	-0.798842	1.02369	0.241804	0.808932	NS
RPL35_RPL36A	1.34716	0.298002	-2.11897	2.71497	0.241655	0.809047	NS
RPL37_RPS10	0.502702	-0.687758	-6.26765	4.89213	-0.241578	0.809107	NS
RPL22_RPL36A	1.36811	0.313433	-2.28079	2.90765	0.236802	0.81281	NS
LENG1_SNRPN	1.11247	0.106587	-0.779175	0.992349	0.23585	0.813549	NS
DDX47_EXOSC2	0.835544	-0.179672	-1.68063	1.32129	-0.234617	0.814506	NS
EIF3CL_EIF3E	0.613972	-0.487807	-4.57495	3.59934	-0.233925	0.815044	NS
ATP6V1F_RNASEK	0.814672	-0.20497	-1.93629	1.52635	-0.232038	0.816508	NS
RPL10_RPL36A	1.33986	0.292567	-2.181	2.76613	0.23182	0.816678	NS
RPS10_UPF2	0.898499	-0.107029	-1.01201	0.797948	-0.2318	0.816693	NS
RPL36A_RPLP2	0.722271	-0.325355	-3.08793	2.43722	-0.23083	0.817447	NS
ILK_PPP1R12A	0.907978	-0.0965346	-0.923544	0.730475	-0.228781	0.819039	NS
MRPL22_MRPL38	1.18446	0.169284	-1.28387	1.62244	0.228324	0.819395	NS
RPL18_RPL36A	1.33805	0.291216	-2.23502	2.81745	0.225938	0.821249	NS
RPL17_RPS19	0.570545	-0.561164	-5.44359	4.32126	-0.225269	0.82177	NS
NCBP1_RPL17	1.16963	0.156684	-1.2069	1.52026	0.225213	0.821814	NS
BBS1_BBS7	0.873456	-0.135298	-1.31911	1.04851	-0.224005	0.822754	NS
NDUFA10_NDUFA13	1.17576	0.161919	-1.25558	1.57942	0.223884	0.822848	NS
BBS1_CCT2	1.12604	0.118705	-0.920815	1.15822	0.223813	0.822903	NS
RPL36A_SMG6	1.14487	0.135293	-1.06141	1.332	0.221583	0.824638	NS
PPIE_SNRPN	0.884145	-0.123134	-1.22705	0.980778	-0.218621	0.826945	NS
HNRNPF_SNRPN	1.20271	0.184577	-1.47784	1.847	0.217614	0.82773	NS
RPL17_UPF3A	0.881952	-0.125618	-1.26785	1.01662	-0.215549	0.82934	NS
RPS10_RPS3A	1.69811	0.529514	-4.33116	5.39019	0.213515	0.830925	NS
EIF3CL_EIF3D	1.33651	0.290061	-2.37671	2.95683	0.213183	0.831185	NS
RPL11_RPL36A	1.31326	0.272514	-2.25876	2.80379	0.211008	0.832881	NS
DDX47_ESF1	1.12774	0.120215	-1.00647	1.2469	0.209124	0.834352	NS
BBS1_CCT4	0.899	-0.106472	-1.11608	0.903132	-0.206697	0.836247	NS
RPL17_RPS14	1.77091	0.571491	-4.86967	6.01265	0.205857	0.836903	NS
BUD13_SNRPN	1.15969	0.148155	-1.26474	1.56105	0.20552	0.837166	NS
PABPC1_RPS10	0.676325	-0.391082	-4.15342	3.37126	-0.203731	0.838563	NS
CHUK_UBE2V1	1.11953	0.112911	-0.987497	1.21332	0.201109	0.840613	NS
RPL36A_RPN2	1.2582	0.229678	-2.00923	2.46859	0.201063	0.84065	NS
PRPF4_U2AF1	0.903991	-0.100935	-1.09304	0.891164	-0.199405	0.841946	NS
RPL36A_SSR1	1.22124	0.199868	-1.76609	2.16583	0.199258	0.842061	NS
SNRPN_UBL5	1.11797	0.111511	-0.986022	1.20904	0.199135	0.842158	NS
RPL36A_RPL8	0.747046	-0.291628	-3.18385	2.60059	-0.197627	0.843337	NS
MAGOH_SARNP	1.13478	0.126442	-1.13499	1.38787	0.196461	0.84425	NS
DCP1A_RPL36A	1.09939	0.0947544	-0.852307	1.04182	0.196096	0.844535	NS
RPL17_RSL24D1	1.20568	0.187043	-1.70997	2.08406	0.19325	0.846764	NS
CDC5L_SNRPN	1.11794	0.11149	-1.02985	1.25283	0.191455	0.848169	NS
RPL12_RPL36A	1.27141	0.240127	-2.22499	2.70524	0.19092	0.848588	NS
EIF4A1_G3BP1	0.895393	-0.110493	-1.28341	1.06242	-0.184636	0.853515	NS
ARPC1B_ARPC5L	1.10306	0.0980912	-0.947666	1.14385	0.183843	0.854137	NS
ACTL6A_HDAC10	0.934026	-0.0682511	-0.796632	0.66013	-0.183653	0.854285	NS
EIF2S2_RPL17	1.15219	0.141664	-1.38002	1.66335	0.182466	0.855217	NS
RPL19_RPL36A	1.26157	0.232358	-2.28126	2.74598	0.181178	0.856228	NS
RPL13_RPL36A	1.25536	0.227419	-2.23301	2.68785	0.18116	0.856242	NS
IFT88_UBE2V1	1.09845	0.0939027	-0.923498	1.1113	0.180898	0.856447	NS
GPS2_RBBP7	1.09646	0.0920858	-0.908332	1.0925	0.180409	0.856831	NS
RPS10_SPCS1	1.19765	0.180364	-1.78672	2.14745	0.179711	0.85738	NS
EEFSEC_RPL17	1.11161	0.105814	-1.05471	1.26634	0.178705	0.85817	NS
RPL36A_RPLP1	0.771858	-0.258955	-3.12352	2.60561	-0.17718	0.859367	NS
EIF3CL_EIF4A2	1.53304	0.427255	-4.3048	5.15931	0.176964	0.859537	NS
APC_PSMA6	1.05518	0.0537137	-0.544445	0.651873	0.176002	0.860293	NS
RPL17_RPS18	1.59979	0.469875	-4.77276	5.71251	0.175663	0.860558	NS
DRG1_RPS10	0.895659	-0.110195	-1.34353	1.12314	-0.175118	0.860987	NS
ARIH1_EIF4A1	1.13297	0.12484	-1.27316	1.52284	0.175023	0.861062	NS
GPKOW_U2AF1	0.90838	-0.0960929	-1.1729	0.980716	-0.174904	0.861155	NS
ILK_ILKAP	0.919771	-0.0836311	-1.03464	0.867374	-0.172359	0.863156	NS
RPL17_RPS25	0.615463	-0.485381	-6.04402	5.07326	-0.171144	0.86411	NS
GABARAP_PIK3C3	1.10254	0.0976152	-1.02744	1.22267	0.170056	0.864966	NS
RPL17_RPL30	0.614238	-0.487373	-6.12247	5.14772	-0.169515	0.865392	NS
U2AF2_ZC3H11A	0.815224	-0.204292	-2.58349	2.17491	-0.168294	0.866352	NS
EIF2S1_RPS10	1.14213	0.132899	-1.41735	1.68315	0.168022	0.866566	NS
NDUFA13_NDUFB7	1.1105	0.104807	-1.13482	1.34443	0.16571	0.868385	NS
GSPT1_RPL17	1.17636	0.162428	-1.76354	2.08839	0.165295	0.868712	NS
RPL27A_RPL36A	1.23872	0.214076	-2.32518	2.75334	0.165238	0.868757	NS
CASC3_ZC3H11A	0.846648	-0.16647	-2.15721	1.82427	-0.163896	0.869813	NS
COPS5_EIF4A1	0.872826	-0.136019	-1.77423	1.5022	-0.162733	0.870729	NS
DDX47_NOP14	0.900327	-0.104998	-1.3764	1.1664	-0.161862	0.871414	NS
EIF2S3_EIF4A1	1.24995	0.223106	-2.48564	2.93185	0.161432	0.871753	NS
ELP2_SRCAP	0.897718	-0.107899	-1.42042	1.20462	-0.161124	0.871996	NS
MALT1_UBE2V1	1.08887	0.0851426	-0.950739	1.12102	0.161096	0.872018	NS
SMU1_U2AF1	0.903568	-0.101404	-1.33958	1.13677	-0.160518	0.872473	NS
EIF3F_EIF4A1	0.841748	-0.172274	-2.29553	1.95098	-0.159025	0.873649	NS
EEF2_RPL36A	1.21733	0.196659	-2.25142	2.64474	0.157447	0.874892	NS
MAGOH_RPL17	0.929278	-0.0733473	-0.988118	0.841423	-0.157152	0.875125	NS
SNRPB2_SNRPN	0.908339	-0.0961371	-1.30284	1.11056	-0.156149	0.875915	NS
THOC7_ZC3H11A	1.06732	0.0651544	-0.754082	0.88439	0.155877	0.87613	NS
ERCC5_GTF2H3	1.06953	0.0672147	-0.788801	0.92323	0.153897	0.877691	NS
RPL34_RPL36A	1.21265	0.192808	-2.26583	2.65144	0.153702	0.877845	NS
NCBP2_ZC3H11A	0.846909	-0.166162	-2.29125	1.95893	-0.15325	0.878201	NS
NDUFB8_NDUFS3	1.17483	0.161121	-1.93079	2.25303	0.150959	0.880008	NS
EIF4B_RPS10	0.777766	-0.251329	-3.51799	3.01533	-0.150795	0.880137	NS
DDX47_NOL11	1.12806	0.120501	-1.45174	1.69274	0.150217	0.880593	NS
RPL36A_SERBP1	1.20443	0.186003	-2.24676	2.61877	0.149854	0.88088	NS
DDX47_UTP6	1.11325	0.107286	-1.30909	1.52366	0.148462	0.881978	NS
DDX47_MPHOSPH10	1.08739	0.0837846	-1.02614	1.19371	0.147952	0.882381	NS
RPL17_UPF3B	0.909082	-0.0953198	-1.36408	1.17344	-0.147248	0.882936	NS
RPL14_RPS10	1.65176	0.501844	-6.2085	7.21219	0.146579	0.883464	NS
HSP90AB1_TXNDC5	1.12451	0.117351	-1.47543	1.71013	0.144403	0.885182	NS
GABARAP_YWHAZ	1.52041	0.418979	-5.26984	6.1078	0.14435	0.885224	NS
GTF2H4_RFC1	0.954621	-0.0464407	-0.678756	0.585875	-0.14395	0.88554	NS
KRI1_RPS10	1.08821	0.0845381	-1.07028	1.23935	0.143479	0.885912	NS
RPL13A_RPL36A	1.19546	0.178533	-2.27411	2.63117	0.14267	0.886551	NS
PPP2R2A_RPL36A	0.921243	-0.0820313	-1.21737	1.05331	-0.141613	0.887386	NS
ZNF410_ZNF426	1.09325	0.0891536	-1.15434	1.33265	0.140522	0.888248	NS
RPL36A_RPL37A	0.816048	-0.203282	-3.07153	2.66497	-0.138909	0.889522	NS
SRCAP_TRRAP	0.906794	-0.0978398	-1.49058	1.2949	-0.137687	0.890488	NS
TAB2_UBE2V1	0.928554	-0.074127	-1.16387	1.01562	-0.133321	0.893939	NS
RPL23_RPL36A	1.188	0.172269	-2.36289	2.70743	0.133183	0.894048	NS
GTF2H4_RNF111	1.03922	0.0384665	-0.5338	0.610733	0.131744	0.895186	NS
GABARAP_STX17	0.919405	-0.084028	-1.33502	1.16696	-0.131649	0.895262	NS
NDUFA13_NDUFS4	0.929781	-0.0728059	-1.16678	1.02117	-0.130438	0.89622	NS
EEF1A1_RPL36A	1.17754	0.163424	-2.29748	2.62433	0.130158	0.896442	NS
CSTF2T_SARNP	0.957884	-0.0430281	-0.692294	0.606238	-0.129891	0.896653	NS
RPL36A_RPS24	0.823728	-0.193915	-3.12744	2.73961	-0.12956	0.896915	NS
RPL36A_RPS3	0.831598	-0.184406	-3.01803	2.64922	-0.12755	0.898505	NS
UPF3B_ZC3H11A	0.926079	-0.0767956	-1.27164	1.11804	-0.125972	0.899754	NS
RPL36A_RPS6	0.83257	-0.183238	-3.03887	2.6724	-0.125765	0.899918	NS
EIF3K_EIF4A1	1.16693	0.154379	-2.26911	2.57787	0.124852	0.900641	NS
GABARAP_TBC1D25	0.909084	-0.0953183	-1.59168	1.40104	-0.12485	0.900642	NS
BMS1_DDX47	0.913259	-0.0907354	-1.54888	1.36741	-0.121962	0.902929	NS
ILK_TNS1	0.928712	-0.0739564	-1.27203	1.12412	-0.120987	0.903701	NS
RPL17_RPS2	0.777927	-0.251122	-4.3375	3.83526	-0.120446	0.904129	NS
RPL10A_RPL36A	1.16017	0.148571	-2.27658	2.57372	0.120072	0.904426	NS
MRPL38_MRPS18B	0.926256	-0.0766048	-1.32743	1.17422	-0.120035	0.904455	NS
MRPL3_MRPL38	1.05291	0.0515565	-0.79047	0.893583	0.120007	0.904478	NS
RPL36A_RPL4	0.840979	-0.173189	-3.01183	2.66545	-0.11958	0.904816	NS
NDUFS3_NDUFS7	0.924412	-0.0785978	-1.37025	1.21305	-0.119265	0.905065	NS
EIF5B_RPS10	0.884989	-0.122181	-2.13546	1.8911	-0.118945	0.905319	NS
BTF3_RPS10	0.761939	-0.271889	-4.79719	4.25341	-0.117759	0.906259	NS
RPL36A_RPS12	0.848464	-0.164327	-2.90103	2.57238	-0.117687	0.906315	NS
GTF2H4_PARP1	0.959209	-0.0416458	-0.739165	0.655873	-0.117021	0.906844	NS
SEH1L_ZC3H11A	0.935774	-0.0663815	-1.18407	1.0513	-0.116406	0.907331	NS
RPL15_RPL36A	1.15685	0.145702	-2.31212	2.60352	0.116188	0.907503	NS
RPS10_SECISBP2	0.929241	-0.0733876	-1.32279	1.17602	-0.115124	0.908347	NS
MRPL1_MRPS24	0.932407	-0.0699854	-1.28606	1.14609	-0.112796	0.910192	NS
RPL17_RPL18A	0.94083	-0.0609929	-1.13553	1.01354	-0.111252	0.911417	NS
RPL3_RPL36A	1.14877	0.138695	-2.31249	2.58988	0.1109	0.911695	NS
EIF5B_RPL17	1.11193	0.106095	-1.78028	1.99247	0.110233	0.912224	NS
SMC3_TOP3B	1.03674	0.0360831	-0.613241	0.685407	0.108916	0.913269	NS
RIOK2_RPS10	1.08537	0.081918	-1.41492	1.57876	0.107264	0.91458	NS
RPL36_RPS10	0.784046	-0.243287	-4.72133	4.23475	-0.106483	0.915199	NS
PPP2R1A_RPL36A	1.13968	0.130746	-2.3604	2.62189	0.102867	0.918068	NS
RPL36A_RPS27A	0.867256	-0.142421	-2.86419	2.57935	-0.102558	0.918314	NS
EIF4G1_RPL17	1.21645	0.195939	-3.55514	3.94701	0.102379	0.918456	NS
GTF2H4_TBP	1.05264	0.051302	-0.931504	1.03411	0.102309	0.918511	NS
RPL36A_RSL24D1	0.909979	-0.0943341	-1.90684	1.71817	-0.102009	0.91875	NS
RPS10_SSR4	1.08563	0.0821633	-1.51402	1.67835	0.100889	0.919639	NS
EIF2S2_EIF3CL	1.0737	0.0711093	-1.31804	1.46025	0.100329	0.920083	NS
RPL17_RPL32	1.32538	0.281698	-5.22814	5.79154	0.100206	0.920181	NS
DDX47_RRP1	0.957597	-0.0433287	-0.901706	0.815048	-0.0989341	0.921191	NS
ETF1_RPL36A	0.929901	-0.0726776	-1.51391	1.36855	-0.0988361	0.921268	NS
TOMM20_TOMM6	1.06633	0.0642223	-1.23225	1.36069	0.0970894	0.922655	NS
RPL36A_RPS13	0.864968	-0.145062	-3.08592	2.7958	-0.0966783	0.922982	NS
ATP6V0C_ITFG2	0.951866	-0.0493312	-1.05458	0.955915	-0.0961828	0.923375	NS
ERCC8_GTF2H4	0.960678	-0.0401162	-0.864035	0.783802	-0.0954298	0.923973	NS
RPL36A_RPL5	0.871563	-0.137467	-2.97885	2.70392	-0.0948237	0.924455	NS
GPS2_PRKACA	0.951193	-0.0500378	-1.09953	0.999449	-0.0934479	0.925548	NS
DCUN1D1_SPSB3	0.976747	-0.0235281	-0.522223	0.475167	-0.0924697	0.926325	NS
EED_GPS2	1.0583	0.0566636	-1.14683	1.26016	0.0922801	0.926475	NS
RPL36A_RPL7A	0.877763	-0.130379	-2.90956	2.6488	-0.0919474	0.92674	NS
RPL36A_RPS4X	0.87714	-0.131089	-2.97096	2.70878	-0.0904724	0.927912	NS
NCBP1_ZC3H11A	0.931149	-0.0713358	-1.62445	1.48178	-0.0900225	0.928269	NS
CHM_RABGEF1	1.03533	0.0347158	-0.723817	0.793249	0.0897016	0.928524	NS
DDX47_NOP58	1.0522	0.0508837	-1.06957	1.17134	0.0890085	0.929075	NS
DNAJC8_U2AF1	1.0781	0.0752032	-1.58475	1.73516	0.0887949	0.929245	NS
CALM3_GPS2	1.051	0.0497387	-1.06436	1.16383	0.0875023	0.930272	NS
ERCC2_ERCC5	1.03797	0.0372678	-0.812807	0.887343	0.085926	0.931525	NS
RPL17_RPL35A	1.31115	0.270904	-5.96154	6.50335	0.0851931	0.932108	NS
RPL17_RPS16	0.791348	-0.234018	-5.6271	5.15906	-0.0850472	0.932224	NS
CPSF7_ZC3H11A	1.09088	0.0869884	-1.92015	2.09412	0.0849441	0.932306	NS
PPP1R8_SNRPN	1.07338	0.0708121	-1.61766	1.75928	0.0821982	0.934489	NS
BBS1_CCT5	1.04386	0.0429281	-0.985209	1.07106	0.0818349	0.934778	NS
RPS10_UPF3A	0.955018	-0.0460253	-1.15382	1.06177	-0.0814303	0.9351	NS
MRPL38_MRPS23	0.962196	-0.0385371	-0.992336	0.915262	-0.0791901	0.936881	NS
PSMA6_SMURF2	0.973652	-0.0267017	-0.691509	0.638106	-0.0787212	0.937254	NS
RPL36A_RPS15	1.06849	0.0662468	-1.59017	1.72267	0.0783868	0.93752	NS
RPL17_RPL27	0.843302	-0.17043	-4.48738	4.14652	-0.077378	0.938323	NS
RPL17_SSR4	0.946625	-0.0548519	-1.46456	1.35486	-0.0762622	0.939211	NS
MRPL11_MRPL38	1.05364	0.0522526	-1.30085	1.40535	0.0756877	0.939668	NS
EIF3A_EIF3CL	1.07139	0.0689612	-1.72763	1.86556	0.075232	0.94003	NS
ZNF410_ZNF440	1.0624	0.0605276	-1.52252	1.64357	0.0749389	0.940263	NS
ASF1B_IPO4	0.97254	-0.0278436	-0.769603	0.713916	-0.0735716	0.941351	NS
NCBP2_RPS10	1.08252	0.0792939	-2.05366	2.21225	0.0728629	0.941915	NS
PALB2_RAD50	0.964535	-0.0361092	-1.01383	0.941612	-0.0723854	0.942295	NS
CBX1_GPS2	0.969789	-0.0306768	-0.870394	0.809041	-0.0716019	0.942919	NS
ATP6V0C_RHEB	1.04081	0.0399953	-1.05575	1.13574	0.07154	0.942968	NS
RPL36A_SRP68	1.06861	0.0663597	-1.78168	1.9144	0.0703789	0.943892	NS
ILK_ITGB4	0.986063	-0.0140347	-0.407692	0.379623	-0.0698769	0.944292	NS
EIF4A1_RPS15	0.934139	-0.0681302	-2.0035	1.86724	-0.068996	0.944993	NS
RPL17_UPF1	1.09691	0.0924997	-2.57278	2.75778	0.0680214	0.945769	NS
ZNF28_ZNF337	1.02125	0.0210256	-0.605249	0.647301	0.065801	0.947536	NS
DDX47_EXOSC9	0.957926	-0.042985	-1.32385	1.23788	-0.0657751	0.947557	NS
GABARAP_ULK1	1.05198	0.0506728	-1.46293	1.56428	0.065616	0.947684	NS
DCP1A_RPS10	0.968443	-0.0320662	-0.995984	0.931852	-0.0652011	0.948014	NS
CPSF2_ZC3H11A	0.956834	-0.0441252	-1.38872	1.30047	-0.0643194	0.948716	NS
SNRPD3_U2AF1L4	1.03172	0.0312244	-0.931157	0.993605	0.063591	0.949296	NS
FAU_RPL36A	1.0791	0.0761253	-2.31616	2.46841	0.0623683	0.95027	NS
EIF4H_RPS10	0.92776	-0.0749822	-2.45369	2.30373	-0.0617824	0.950736	NS
ATP6V1C1_RNASEK	1.03074	0.0302798	-0.93866	0.99922	0.0612498	0.95116	NS
MRPL38_MRPS16	0.963575	-0.0371048	-1.26012	1.18591	-0.0594628	0.952584	NS
NCBP1_RPS10	1.03678	0.0361159	-1.16889	1.24113	0.058743	0.953157	NS
RNPS1_ZC3H11A	1.04819	0.0470615	-1.55519	1.64932	0.0575682	0.954093	NS
ERCC5_RFC4	1.03661	0.0359545	-1.19441	1.26632	0.0572751	0.954326	NS
PSMA5_PSMA6	1.0622	0.0603405	-2.01912	2.13981	0.0568729	0.954646	NS
RPL17_SPCS1	0.941906	-0.0598497	-2.13077	2.01107	-0.056643	0.95483	NS
ATP6V0C_ATP6V1E1	0.963412	-0.0372746	-1.35116	1.27661	-0.0556037	0.955658	NS
DDX47_XRN2	1.02721	0.0268421	-0.939432	0.993117	0.0544458	0.95658	NS
CHD1L_ERCC5	1.02516	0.0248473	-0.886947	0.936642	0.053411	0.957404	NS
DCP1A_RPL17	1.02872	0.0283194	-1.03	1.08664	0.0524463	0.958173	NS
EIF2S3_RPL36A	0.947105	-0.0543455	-2.19595	2.08726	-0.0497362	0.960333	NS
GSPT1_RPS10	0.961281	-0.0394889	-1.61689	1.53791	-0.0490661	0.960867	NS
MAGOH_SNRPN	1.02239	0.0221409	-0.872468	0.91675	0.0485077	0.961312	NS
ATP6V0C_RRAGB	1.02289	0.0226364	-0.898234	0.943507	0.0481788	0.961574	NS
NDUFA13_NDUFV1	0.958067	-0.0428373	-1.80585	1.72017	-0.0476229	0.962017	NS
GPS2_TBL1X	0.986673	-0.0134161	-0.572266	0.545434	-0.0470523	0.962472	NS
GTF2H4_POLR2J	1.01891	0.0187341	-0.763316	0.800785	0.0469512	0.962552	NS
CCDC22_SPSB3	1.02395	0.0236715	-0.98234	1.02968	0.0461181	0.963216	NS
EEFSEC_RPS10	1.02997	0.0295321	-1.26715	1.32621	0.0446386	0.964395	NS
ATP6V1B2_RNASEK	1.02632	0.0259774	-1.11869	1.17065	0.04448	0.964522	NS
RPL17_RPL28	1.11216	0.106305	-4.58882	4.80143	0.0443767	0.964604	NS
RPL36A_RPL6	1.06674	0.0646053	-2.82489	2.9541	0.0438223	0.965046	NS
ARPC1B_VCL	0.979017	-0.0212063	-0.979181	0.936768	-0.0433869	0.965393	NS
BBS1_LZTFL1	1.02776	0.0273791	-1.21915	1.27391	0.043049	0.965662	NS
EIF3A_RPS10	0.967634	-0.0329009	-1.5693	1.5035	-0.0419713	0.966522	NS
NDUFAF1_NDUFV2	0.97716	-0.0231053	-1.10751	1.06129	-0.0417609	0.966689	NS
RPL17_RPL29	0.896479	-0.10928	-5.29223	5.07367	-0.0413249	0.967037	NS
RPL36A_RPS17	0.94432	-0.0572898	-2.91498	2.8004	-0.0392926	0.968657	NS
CASC3_RPS10	1.03009	0.0296463	-1.51737	1.57666	0.0375598	0.970039	NS
EIF3E_RPS10	0.923217	-0.0798913	-4.3181	4.15832	-0.0369458	0.970528	NS
GPS2_NR1H2	0.978317	-0.0219218	-1.19177	1.14793	-0.0367277	0.970702	NS
GPS2_NCOR1	0.989463	-0.0105933	-0.589759	0.568573	-0.0358488	0.971403	NS
CHMP4A_SPAST	1.01314	0.0130575	-0.708378	0.734493	0.0354741	0.971702	NS
NDUFA13_NDUFB11	1.03208	0.0315776	-1.82041	1.88356	0.0334188	0.973341	NS
HSP90AA1_TXNDC5	1.0283	0.0279099	-1.61747	1.67329	0.033246	0.973478	NS
RPS10_RPS5	0.922571	-0.0805912	-4.90746	4.74627	-0.0327243	0.973894	NS
CTDP1_GTF2H4	1.01549	0.0153714	-0.920605	0.951348	0.0321882	0.974322	NS
DDX47_FBL	0.980317	-0.0198789	-1.28211	1.24236	-0.0308673	0.975375	NS
ELF1_GPS2	1.00792	0.00789101	-0.50428	0.520062	0.0301971	0.97591	NS
DRG1_RPL17	0.983139	-0.0170043	-1.19576	1.16175	-0.0282737	0.977444	NS
DDX47_RPS7	0.971708	-0.0286997	-2.03235	1.97495	-0.0280739	0.977603	NS
SNRPD1_U2AF1	1.0183	0.0181376	-1.25232	1.28859	0.0279813	0.977677	NS
GABARAP_HSPA1B	0.988405	-0.0116631	-0.844141	0.820814	-0.0274593	0.978093	NS
BBS1_BBS4	0.987224	-0.0128579	-1.01464	0.988924	-0.0251562	0.97993	NS
DDOST_RPL36A	0.972059	-0.0283389	-2.32379	2.26712	-0.0241971	0.980695	NS
CDC40_ZC3H11A	1.01649	0.0163523	-1.36966	1.40236	0.0231239	0.981551	NS
SF3A3_SNRPN	0.979384	-0.0208315	-1.89341	1.85174	-0.0218036	0.982605	NS
NUDT21_ZC3H11A	0.982798	-0.0173516	-1.67953	1.64483	-0.0204602	0.983676	NS
MAGOHB_ZC3H11A	0.989765	-0.0102873	-1.13684	1.11626	-0.0178977	0.98572	NS
DHX9_SNRPN	0.985356	-0.0147522	-1.6661	1.6366	-0.0175093	0.98603	NS
EIF3CL_EIF5B	0.983568	-0.0165686	-1.98777	1.95463	-0.0164742	0.986856	NS
MAGOH_RPL36A	0.99245	-0.00757886	-1.00263	0.987473	-0.0149282	0.988089	NS
EEF1A1_EEF1G	1.09458	0.0903734	-12.2303	12.4111	0.0143765	0.98853	NS
CSTF2T_U2AF1	1.00579	0.00577673	-0.810906	0.822459	0.0138636	0.988939	NS
EIF4A1_PAN2	1.00452	0.00450956	-0.693608	0.702628	0.0126606	0.989899	NS
RPL18A_RPS10	0.993394	-0.00662794	-1.1063	1.09304	-0.0118131	0.990575	NS
LSM6_SNRPN	0.990656	-0.00938824	-1.623	1.60422	-0.0114034	0.990902	NS
DDX47_DDX49	1.0044	0.00438764	-0.822946	0.831721	0.0103944	0.991707	NS
CRTC1_RBM4	1.00357	0.00355989	-0.720283	0.727403	0.00963919	0.992309	NS
SNRNP40_U2AF1	1.00456	0.00454957	-0.960643	0.969742	0.00923856	0.992629	NS
EIF3M_EIF4A1	1.0084	0.00836413	-1.89784	1.91456	0.00860004	0.993138	NS
RPL17_RPSA	1.01376	0.0136667	-3.4368	3.46414	0.00776308	0.993806	NS
RBM8A_RPL36A	0.995387	-0.00462354	-1.34012	1.33087	-0.00678547	0.994586	NS
PALB2_RTEL1	1.00215	0.00214849	-0.819251	0.823548	0.00512657	0.99591	NS
EIF2S2_RPS10	1.00336	0.00334983	-1.56238	1.56908	0.00419329	0.996654	NS
ATP6V0C_ATP6V0D1	1.00196	0.00195418	-1.23807	1.24198	0.00308875	0.997536	NS
RPS10_UPF3B	1.00171	0.00171282	-1.26308	1.2665	0.00265425	0.997882	NS
COPS2_SPSB3	0.999466	-0.000533947	-0.668617	0.667549	-0.00156645	0.99875	NS

## Sheet: Table S5
Table S5_95 models_C-index
Models	C-index
RSF	0.772236
CoxBoost+StepCox[forward]	0.763849
CoxBoost+StepCox[both]	0.763767
CoxBoost+StepCox[backward]	0.763767
CoxBoost+Enet[alpha=0.6]	0.761599
Lasso+RSF	0.759717
CoxBoost+RSF	0.759471
CoxBoost+Enet[alpha=0.3]	0.753416
CoxBoost+Enet[alpha=0.8]	0.75313
Enet[alpha=0.9]	0.752516
CoxBoost+Enet[alpha=0.1]	0.752475
CoxBoost+Enet[alpha=0.2]	0.752475
Enet[alpha=0.1]	0.752393
Enet[alpha=0.3]	0.751575
Enet[alpha=0.4]	0.751452
Enet[alpha=0.5]	0.751452
Enet[alpha=0.6]	0.751452
Enet[alpha=0.2]	0.751248
CoxBoost+Enet[alpha=0.5]	0.751002
Enet[alpha=0.7]	0.750225
Enet[alpha=0.8]	0.75002
Lasso	0.749939
CoxBoost+Lasso	0.748752
CoxBoost+Enet[alpha=0.4]	0.748466
CoxBoost+Enet[alpha=0.7]	0.748302
CoxBoost+Enet[alpha=0.9]	0.747607
CoxBoost	0.747197
CoxBoost+Ridge	0.745479
Lasso+CoxBoost	0.742329
Lasso+StepCox[forward]	0.740897
CoxBoost+plsRcox	0.740856
Lasso+plsRcox	0.736969
Ridge	0.731405
GBM	0.7303
Lasso+StepCox[both]	0.728377
Lasso+StepCox[backward]	0.728377
plsRcox	0.727927
CoxBoost+GBM	0.724122
Lasso+GBM	0.723631
RSF+plsRcox	0.71594
RSF+Ridge	0.714671
RSF+Enet[alpha=0.4]	0.713403
RSF+Enet[alpha=0.7]	0.712912
RSF+Lasso	0.712708
RSF+Enet[alpha=0.9]	0.712667
RSF+Enet[alpha=0.8]	0.712626
RSF+StepCox[forward]	0.712585
RSF+Enet[alpha=0.6]	0.712585
RSF+Enet[alpha=0.5]	0.712503
RSF+Enet[alpha=0.2]	0.712299
RSF+CoxBoost	0.712299
RSF+Enet[alpha=0.1]	0.712053
RSF+StepCox[both]	0.711889
RSF+StepCox[backward]	0.711889
RSF+Enet[alpha=0.3]	0.707553
RSF+SuperPC	0.696792
StepCox[backward]+RSF	0.696506
RSF+GBM	0.695197
StepCox[both]+RSF	0.691228
StepCox[both]+GBM	0.6783
CoxBoost+SuperPC	0.674045
StepCox[backward]+GBM	0.667212
StepCox[both]+plsRcox	0.666189
StepCox[backward]+plsRcox	0.666189
Lasso+SuperPC	0.655306
SuperPC	0.648719
StepCox[both]+SuperPC	0.632968
StepCox[backward]+SuperPC	0.632968
StepCox[backward]+Ridge	0.610179
StepCox[backward]+CoxBoost	0.609197
StepCox[both]+Ridge	0.601301
StepCox[both]+Enet[alpha=0.5]	0.593282
StepCox[backward]+Enet[alpha=0.1]	0.590623
StepCox[backward]+Enet[alpha=0.2]	0.590377
StepCox[both]+Enet[alpha=0.3]	0.589641
StepCox[both]+Enet[alpha=0.6]	0.58825
StepCox[both]+Enet[alpha=0.8]	0.587063
StepCox[both]+CoxBoost	0.584977
StepCox[both]+Enet[alpha=0.2]	0.584199
StepCox[both]+Enet[alpha=0.4]	0.583667
StepCox[both]+Enet[alpha=0.1]	0.582645
StepCox[backward]+Enet[alpha=0.4]	0.578103
StepCox[backward]+Enet[alpha=0.6]	0.577326
StepCox[backward]+Enet[alpha=0.5]	0.577285
StepCox[backward]+Lasso	0.574503
StepCox[both]+Enet[alpha=0.9]	0.573276
StepCox[backward]+Enet[alpha=0.9]	0.573276
StepCox[both]+Enet[alpha=0.7]	0.572212
StepCox[backward]+Enet[alpha=0.3]	0.569962
StepCox[backward]+Enet[alpha=0.8]	0.569266
StepCox[forward]	0.568898
StepCox[both]+Lasso	0.568161
StepCox[backward]+Enet[alpha=0.7]	0.566893
StepCox[both]	0.560633
StepCox[backward]	0.560633

## Sheet: Table S6
Table S6_TCGA-THCA_PatientInfo&RSFrs
sampleid	RSFrs	RSFrs_cat	PFS.mon	PFS	Gender	pstage	pstage_cat	Age	Age_cat	BRAF	Focus_type
TCGA-EL-A3ZG-01	15.5696	low	90.8	0	MALE	Stage_I	early	15	young	mut	Unifocal
TCGA-DJ-A4UP-01	15.7573	low	30.5333	0	FEMALE	Stage_I	early	15	young	wt	Unifocal
TCGA-FE-A3PA-01	18.6285	low	107.833	0	MALE	Stage_II	advance	16	young	wt	Unifocal
TCGA-FE-A3PD-01	13.4443	low	79.8667	0	FEMALE	Stage_I	early	17	young	wt	Unifocal
TCGA-DJ-A3UV-01	16.6141	low	48.8667	0	FEMALE	Stage_I	early	18	young	wt	Unifocal
TCGA-EM-A3FQ-01	13.4132	low	16.4	0	FEMALE	Stage_I	early	19	young	wt	Multifocal
TCGA-EL-A3H3-01	14.8554	low	43.9667	0	FEMALE	Stage_I	early	19	young	wt	Unifocal
TCGA-DJ-A13S-01	16.8561	low	8.83333	0	FEMALE	Stage_I	early	19	young	wt	Unifocal
TCGA-EL-A3ZP-01	17.6104	low	66.4	0	MALE	Stage_I	early	19	young	wt	Unifocal
TCGA-ET-A39L-01	13.1553	low	109.967	0	FEMALE	Stage_I	early	20	young	wt	Unifocal
TCGA-EM-A2CT-01	21.7415	low	49.1333	0	FEMALE	Stage_I	early	20	young	wt	Unifocal
TCGA-DJ-A1QD-01	22.2121	low	48.7333	0	FEMALE	Stage_I	early	20	young	mut	Unifocal
TCGA-FY-A3ON-01	22.2264	low	19.8333	0	MALE	Stage_I	early	20	young	mut	Multifocal
TCGA-FK-A3SG-01	12.1407	low	0.933333	0	FEMALE	Stage_I	early	21	young	wt	Multifocal
TCGA-FY-A3RA-01	15.9547	low	18.3333	0	FEMALE	Stage_I	early	21	young	mut	Unifocal
TCGA-DJ-A13V-01	22.0073	low	43.7667	0	FEMALE	Stage_I	early	21	young	mut	Multifocal
TCGA-EL-A3CX-01	18.327	low	108.1	0	FEMALE	Stage_I	early	22	young	wt	Unifocal
TCGA-EL-A3ZS-01	20.2093	low	7.16667	0	FEMALE	Stage_I	early	22	young	wt	Unifocal
TCGA-E8-A438-01	16.6909	low	33.9667	0	FEMALE	Stage_I	early	23	young	wt	Unifocal
TCGA-E8-A44M-01	20.8525	low	30.5667	0	FEMALE	Stage_I	early	23	young	wt	Unifocal
TCGA-ET-A39J-01	21.311	low	107.567	0	FEMALE	Stage_I	early	23	young	mut	Multifocal
TCGA-ET-A40R-01	9.30687	low	45	0	FEMALE	Stage_I	early	24	young	NA	Unifocal
TCGA-ET-A25P-01	17.3859	low	18.6333	0	FEMALE	Stage_I	early	24	young	NA	Multifocal
TCGA-EM-A3FJ-01	17.4668	low	28.3333	0	FEMALE	Stage_I	early	24	young	mut	Multifocal
TCGA-ET-A39R-01	20.3502	low	95.4333	0	FEMALE	Stage_I	early	24	young	wt	Multifocal
TCGA-E8-A433-01	15.3558	low	31.7	0	FEMALE	Stage_I	early	25	young	mut	Unifocal
TCGA-H2-A2K9-01	17.6046	low	21.9667	0	MALE	Stage_I	early	25	young	wt	Multifocal
TCGA-FE-A235-01	13.341	low	119.033	0	FEMALE	Stage_I	early	26	young	mut	Multifocal
TCGA-EM-A2CP-01	15.8927	low	3.03333	0	FEMALE	Stage_I	early	26	young	wt	Multifocal
TCGA-DJ-A2PQ-01	18.1011	low	35.9	0	MALE	Stage_I	early	26	young	mut	Unifocal
TCGA-ET-A40T-01	19.83	low	38	0	FEMALE	Stage_I	early	26	young	wt	Unifocal
TCGA-EM-A4G1-01	20.2985	low	13.8667	0	FEMALE	Stage_I	early	26	young	wt	Unifocal
TCGA-ET-A39S-01	16.1938	low	55.8667	0	FEMALE	Stage_I	early	27	young	mut	Unifocal
TCGA-CE-A482-01	17.118	low	10.8333	0	FEMALE	Stage_I	early	27	young	wt	Unifocal
TCGA-ET-A3BQ-01	18.9151	low	77.7	0	FEMALE	Stage_I	early	27	young	mut	Unifocal
TCGA-DJ-A13M-01	13.6664	low	49.4667	0	FEMALE	Stage_I	early	28	young	wt	Multifocal
TCGA-EM-A3SX-01	15.1034	low	30.2667	0	FEMALE	Stage_I	early	28	young	mut	Multifocal
TCGA-CE-A27D-01	15.7548	low	12.4667	0	FEMALE	Stage_I	early	28	young	wt	NA
TCGA-EM-A2CK-01	16.4718	low	18.1333	0	MALE	Stage_I	early	28	young	wt	Multifocal
TCGA-ET-A25N-01	18.0539	low	64.2667	0	FEMALE	Stage_I	early	28	young	NA	Unifocal
TCGA-DJ-A3V8-01	18.1132	low	21.5667	0	FEMALE	Stage_I	early	28	young	mut	Multifocal
TCGA-EL-A3ZN-01	18.3286	low	53.8	0	FEMALE	Stage_I	early	28	young	wt	Unifocal
TCGA-KS-A41J-01	20.2317	low	15.9	0	FEMALE	Stage_I	early	28	young	mut	Unifocal
TCGA-FK-A3SB-01	20.3903	low	4.16667	0	FEMALE	Stage_I	early	28	young	mut	Unifocal
TCGA-ET-A3BU-01	21.177	low	78.9	0	MALE	Stage_I	early	28	young	mut	Multifocal
TCGA-DE-A4M9-01	21.2001	low	19.1	0	MALE	Stage_I	early	28	young	wt	Multifocal
TCGA-BJ-A2P4-01	13.9838	low	13	0	FEMALE	Stage_I	early	29	young	wt	Unifocal
TCGA-BJ-A18Y-01	18.0593	low	52.1	0	MALE	Stage_I	early	29	young	wt	Multifocal
TCGA-BJ-A2N8-01	11.0558	low	16.8	0	FEMALE	Stage_I	early	30	young	wt	Multifocal
TCGA-CE-A13K-01	15.9321	low	12.8333	0	FEMALE	Stage_I	early	30	young	wt	Unifocal
TCGA-EM-A3FK-01	19.1158	low	24.1	0	FEMALE	Stage_I	early	30	young	mut	Multifocal
TCGA-BJ-A2N7-01	21.4398	low	18.6333	0	FEMALE	Stage_I	early	30	young	wt	Multifocal
TCGA-ET-A3BW-01	21.4452	low	47.3	0	FEMALE	Stage_I	early	30	young	mut	Multifocal
TCGA-J8-A3YE-01	13.9005	low	28.2333	0	FEMALE	Stage_I	early	31	young	mut	Unifocal
TCGA-FK-A3SE-01	15.3472	low	22.3333	0	FEMALE	Stage_I	early	31	young	wt	Multifocal
TCGA-EM-A3AP-01	17.3276	low	8.46667	0	FEMALE	Stage_I	early	31	young	wt	Unifocal
TCGA-CE-A3MD-01	18.9601	low	12.9667	0	MALE	Stage_I	early	31	young	wt	Unifocal
TCGA-ET-A40P-01	13.5596	low	44.6	0	FEMALE	Stage_I	early	32	young	wt	Unifocal
TCGA-EM-A1CV-01	20.1477	low	49.1667	0	FEMALE	Stage_I	early	32	young	mut	Multifocal
TCGA-CE-A485-01	20.5998	low	12.8333	0	MALE	Stage_I	early	32	young	wt	Multifocal
TCGA-EM-A3O8-01	13.2723	low	12.7	0	FEMALE	Stage_I	early	33	young	mut	Multifocal
TCGA-EM-A22L-01	16.9998	low	10.6	0	FEMALE	Stage_I	early	33	young	wt	Multifocal
TCGA-EM-A4FK-01	18.3079	low	21.6333	0	FEMALE	Stage_I	early	33	young	wt	Unifocal
TCGA-EM-A2P0-01	18.9029	low	17.8333	0	MALE	Stage_I	early	33	young	mut	Multifocal
TCGA-BJ-A45K-01	18.9981	low	23.5	0	MALE	Stage_I	early	33	young	wt	NA
TCGA-EM-A3OB-01	19.1739	low	39.2	0	FEMALE	Stage_I	early	33	young	wt	Unifocal
TCGA-ET-A3DS-01	19.269	low	67.7667	0	FEMALE	Stage_I	early	33	young	wt	Unifocal
TCGA-FE-A3PB-01	21.1649	low	86.3333	0	FEMALE	Stage_I	early	33	young	mut	Unifocal
TCGA-ET-A3BP-01	15.5434	low	80.2	0	FEMALE	Stage_I	early	34	young	mut	Multifocal
TCGA-E3-A3E0-01	16.026	low	67.3	0	FEMALE	Stage_I	early	34	young	wt	NA
TCGA-ET-A39M-01	16.905	low	86.0667	0	MALE	Stage_I	early	34	young	mut	Unifocal
TCGA-EL-A3ZL-01	17.2387	low	63.1667	0	FEMALE	Stage_I	early	34	young	mut	Unifocal
TCGA-DJ-A4UW-01	17.5016	low	27.3	0	FEMALE	Stage_I	early	34	young	mut	Multifocal
TCGA-E3-A3E2-01	20.147	low	64.0667	0	FEMALE	Stage_I	early	34	young	mut	Multifocal
TCGA-BJ-A28T-01	20.2983	low	36.0333	0	FEMALE	Stage_I	early	34	young	wt	Multifocal
TCGA-EL-A3T6-01	20.5339	low	99.6	0	FEMALE	Stage_I	early	34	young	mut	Unifocal
TCGA-ET-A2N3-01	20.6675	low	84.5	0	FEMALE	Stage_I	early	34	young	wt	Unifocal
TCGA-EL-A3GZ-01	20.9261	low	141.933	0	FEMALE	Stage_I	early	34	young	mut	Unifocal
TCGA-H2-A421-01	21.7368	low	20.3333	0	FEMALE	Stage_I	early	34	young	mut	Unifocal
TCGA-ET-A39N-01	20.2106	low	125.033	0	FEMALE	Stage_I	early	35	young	wt	Unifocal
TCGA-EL-A3ZT-01	20.2106	low	60.2667	0	MALE	Stage_I	early	35	young	mut	Unifocal
TCGA-EL-A4KG-01	20.4596	low	24.6333	0	FEMALE	Stage_I	early	35	young	mut	Unifocal
TCGA-EM-A4FU-01	20.8737	low	26.0333	1	MALE	Stage_I	early	35	young	wt	Multifocal
TCGA-EM-A3AN-01	13.1424	low	33.5333	0	FEMALE	Stage_I	early	36	young	wt	Multifocal
TCGA-EM-A3SY-01	16.0433	low	13.7	0	MALE	Stage_I	early	36	young	wt	Unifocal
TCGA-EM-A22Q-01	18.7418	low	14.4333	0	MALE	Stage_I	early	36	young	wt	Unifocal
TCGA-BJ-A45D-01	18.8857	low	11.0333	0	MALE	Stage_I	early	36	young	wt	Unifocal
TCGA-DJ-A4V0-01	19.2282	low	36.0333	0	FEMALE	Stage_I	early	36	young	wt	Unifocal
TCGA-EL-A4KH-01	19.2936	low	27.4333	0	FEMALE	Stage_I	early	36	young	mut	Multifocal
TCGA-EL-A3T8-01	20.8523	low	108.967	0	MALE	Stage_I	early	36	young	mut	Unifocal
TCGA-DJ-A4UR-01	20.9169	low	3.76667	1	FEMALE	Stage_II	advance	36	young	wt	Unifocal
TCGA-BJ-A0ZJ-01	21.7275	low	42.6667	0	MALE	Stage_I	early	36	young	wt	NA
TCGA-ET-A25I-01	13.0923	low	82.8333	0	FEMALE	Stage_I	early	37	young	wt	Unifocal
TCGA-EM-A2OW-01	13.8009	low	40.9	0	FEMALE	Stage_I	early	37	young	wt	Multifocal
TCGA-KS-A41F-01	14.6296	low	145.567	0	FEMALE	Stage_I	early	37	young	mut	Unifocal
TCGA-EL-A3GW-01	15.5034	low	50.9	0	FEMALE	Stage_I	early	37	young	wt	Unifocal
TCGA-FE-A3PC-01	17.4914	low	86.8667	0	FEMALE	Stage_I	early	37	young	mut	Unifocal
TCGA-CE-A484-01	18.0344	low	12.6	0	FEMALE	Stage_I	early	37	young	wt	Unifocal
TCGA-IM-A41Z-01	18.6625	low	31.5333	0	FEMALE	Stage_I	early	37	young	NA	Multifocal
TCGA-DJ-A13T-01	19.3845	low	56.9667	0	FEMALE	Stage_I	early	37	young	mut	Multifocal
TCGA-EL-A3CZ-01	20.2216	low	47.5333	1	FEMALE	Stage_I	early	37	young	wt	Unifocal
TCGA-DJ-A3US-01	21.0311	low	33.2667	0	FEMALE	Stage_I	early	37	young	wt	Unifocal
TCGA-KS-A4I1-01	21.8436	low	27.0667	0	FEMALE	Stage_I	early	37	young	mut	Unifocal
TCGA-DJ-A2Q6-01	18.9714	low	36.9667	0	FEMALE	Stage_I	early	38	young	mut	Multifocal
TCGA-J8-A3O0-01	19.5995	low	43.7667	0	MALE	Stage_I	early	38	young	wt	Unifocal
TCGA-DJ-A3VL-01	21.2158	low	13.7	1	MALE	Stage_I	early	38	young	mut	Unifocal
TCGA-BJ-A28R-01	21.5317	low	42.7333	0	FEMALE	Stage_I	early	38	young	mut	Unifocal
TCGA-EL-A4JW-01	22.1226	low	35.2	0	FEMALE	Stage_I	early	38	young	mut	Unifocal
TCGA-KS-A41L-01	14.7442	low	115.433	0	FEMALE	Stage_I	early	39	young	wt	Unifocal
TCGA-BJ-A45J-01	15.0395	low	21.9333	0	FEMALE	Stage_I	early	39	young	mut	NA
TCGA-E8-A415-01	16.9573	low	31.4667	0	FEMALE	Stage_I	early	39	young	mut	Unifocal
TCGA-ET-A2MZ-01	17.8383	low	37.7667	0	MALE	Stage_I	early	39	young	mut	Unifocal
TCGA-EM-A3AJ-01	17.9501	low	31.3667	0	MALE	Stage_I	early	39	young	wt	Multifocal
TCGA-EL-A3D1-01	18.3291	low	99.9	0	MALE	Stage_I	early	39	young	mut	Multifocal
TCGA-EM-A1CW-01	19.1546	low	18.3	0	FEMALE	Stage_I	early	39	young	wt	Multifocal
TCGA-J8-A3O2-01	20.1693	low	11.4	0	MALE	Stage_I	early	39	young	mut	Multifocal
TCGA-J8-A3YH-01	21.2857	low	5.83333	0	MALE	Stage_I	early	39	young	mut	Multifocal
TCGA-DJ-A3VA-01	22.0738	low	25.1667	0	FEMALE	Stage_I	early	39	young	mut	Multifocal
TCGA-EM-A3FO-01	14.1964	low	17.7333	0	MALE	Stage_I	early	40	young	mut	Multifocal
TCGA-DJ-A3VG-01	16.3618	low	36.1667	0	MALE	Stage_I	early	40	young	wt	Unifocal
TCGA-EM-A3O9-01	17.65	low	9.36667	0	MALE	Stage_I	early	40	young	wt	Multifocal
TCGA-DJ-A2PS-01	21.3749	low	26.5667	0	FEMALE	Stage_I	early	40	young	mut	Multifocal
TCGA-EM-A2CQ-01	21.507	low	12.4667	0	FEMALE	Stage_I	early	40	young	wt	Multifocal
TCGA-H2-A3RH-01	12.9517	low	12.6333	0	FEMALE	Stage_I	early	41	young	wt	Multifocal
TCGA-L6-A4EP-01	15.765	low	33.8667	0	FEMALE	Stage_I	early	41	young	mut	Unifocal
TCGA-MK-A4N9-01	16.9195	low	30.6333	0	FEMALE	Stage_I	early	41	young	mut	Multifocal
TCGA-EL-A4KD-01	18.1977	low	44.2	0	MALE	Stage_I	early	41	young	wt	Unifocal
TCGA-CE-A481-01	18.751	low	11.5333	0	FEMALE	Stage_I	early	41	young	wt	Unifocal
TCGA-EM-A3AR-01	20.3564	low	37.7667	0	MALE	Stage_I	early	41	young	mut	Multifocal
TCGA-EL-A4JV-01	21.1933	low	58.2667	0	FEMALE	Stage_I	early	41	young	wt	Unifocal
TCGA-EM-A3FN-01	11.7886	low	12.2333	0	FEMALE	Stage_I	early	42	young	wt	Multifocal
TCGA-EL-A3ZH-01	13.8998	low	92.4333	0	FEMALE	Stage_I	early	42	young	wt	Unifocal
TCGA-EL-A3TA-01	16.8001	low	67.8333	0	MALE	Stage_I	early	42	young	mut	Unifocal
TCGA-EM-A3SZ-01	18.1248	low	12.9667	0	FEMALE	Stage_I	early	42	young	mut	Multifocal
TCGA-ET-A3DR-01	18.2291	low	81.7	0	FEMALE	Stage_I	early	42	young	wt	Unifocal
TCGA-ET-A3BS-01	19.387	low	5.86667	0	MALE	Stage_I	early	42	young	mut	Multifocal
TCGA-DJ-A1QM-01	19.4172	low	6.1	0	MALE	Stage_I	early	42	young	mut	Multifocal
TCGA-DJ-A1QN-01	20.8593	low	43.1667	0	FEMALE	Stage_I	early	42	young	mut	Multifocal
TCGA-EL-A4K2-01	12.8844	low	30.9333	0	FEMALE	Stage_I	early	43	young	wt	Unifocal
TCGA-DJ-A3UT-01	13.8037	low	36.8333	0	FEMALE	Stage_I	early	43	young	wt	Multifocal
TCGA-ET-A3DQ-01	18.5015	low	86.0333	0	FEMALE	Stage_I	early	43	young	wt	Multifocal
TCGA-FK-A3S3-01	18.9023	low	72.0667	0	FEMALE	Stage_I	early	43	young	wt	Multifocal
TCGA-DE-A2OL-01	17.4044	low	38.1667	0	FEMALE	Stage_I	early	44	young	wt	Unifocal
TCGA-DJ-A2Q1-01	18.1694	low	38.2667	0	FEMALE	Stage_I	early	44	young	wt	Multifocal
TCGA-DJ-A3V2-01	19.3858	low	20.5	0	FEMALE	Stage_I	early	44	young	mut	Multifocal
TCGA-DJ-A3V7-01	21.7931	low	23.5333	0	FEMALE	Stage_III	advance	44	young	mut	Multifocal
TCGA-EL-A3D5-01	21.8696	low	57.9	0	FEMALE	Stage_I	early	44	young	wt	Multifocal
TCGA-EL-A3T0-01	10.3927	low	144.5	0	FEMALE	Stage_III	advance	45	young	wt	Unifocal
TCGA-EM-A3AL-01	11.6305	low	14.3333	0	FEMALE	Stage_I	early	45	young	wt	Multifocal
TCGA-BJ-A45H-01	12.7792	low	28.8333	0	MALE	Stage_III	advance	45	young	mut	Multifocal
TCGA-ET-A4KQ-01	18.2498	low	31.8333	0	FEMALE	Stage_II	advance	45	young	mut	Unifocal
TCGA-J8-A42S-01	18.2834	low	2.5	0	MALE	Stage_III	advance	45	young	mut	Multifocal
TCGA-KS-A4IC-01	19.4867	low	35.7667	0	FEMALE	Stage_III	advance	45	young	mut	Unifocal
TCGA-DJ-A3UM-01	20.8626	low	31.4667	0	FEMALE	Stage_I	early	45	young	mut	Unifocal
TCGA-DJ-A13W-01	21.2117	low	53.1	0	FEMALE	Stage_I	early	45	young	wt	Multifocal
TCGA-E8-A414-01	21.6622	low	31.9333	0	FEMALE	Stage_III	advance	45	young	mut	Unifocal
TCGA-EM-A22K-01	16.5654	low	15.9667	0	FEMALE	Stage_IVA	advance	46	elder	wt	Multifocal
TCGA-EM-A2CR-01	16.5863	low	13.8333	0	FEMALE	Stage_II	advance	46	elder	wt	Multifocal
TCGA-ET-A2N5-01	17.2799	low	82	0	FEMALE	Stage_III	advance	46	elder	wt	Unifocal
TCGA-FY-A40K-01	17.9533	low	15.3667	0	FEMALE	Stage_I	early	46	elder	mut	Multifocal
TCGA-EM-A3O7-01	17.9832	low	7.43333	0	FEMALE	Stage_III	advance	46	elder	mut	Multifocal
TCGA-EL-A3ZR-01	19.0609	low	61	0	FEMALE	Stage_II	advance	46	elder	wt	Unifocal
TCGA-EM-A2OX-01	20.0196	low	20	0	MALE	Stage_IVA	advance	46	elder	mut	Multifocal
TCGA-EM-A2P2-01	20.1106	low	17.5333	0	MALE	Stage_III	advance	46	elder	wt	Multifocal
TCGA-KS-A4I9-01	20.5639	low	88.6	0	FEMALE	Stage_I	early	46	elder	mut	Unifocal
TCGA-E3-A3E1-01	20.5773	low	81.6333	0	FEMALE	Stage_I	early	46	elder	mut	Unifocal
TCGA-DJ-A2PY-01	20.5847	low	8.9	0	FEMALE	Stage_III	advance	46	elder	mut	Multifocal
TCGA-EM-A2OY-01	20.7538	low	32.7667	0	FEMALE	Stage_II	advance	46	elder	wt	Multifocal
TCGA-EM-A2CU-01	13.9553	low	13.3333	0	FEMALE	Stage_III	advance	47	elder	wt	Unifocal
TCGA-J8-A3YD-01	17.9705	low	32.2667	0	FEMALE	Stage_III	advance	47	elder	mut	Unifocal
TCGA-KS-A41I-01	19.0764	low	16.2	0	FEMALE	Stage_I	early	47	elder	wt	Unifocal
TCGA-DJ-A2PP-01	19.9876	low	31	0	MALE	Stage_II	advance	47	elder	wt	Multifocal
TCGA-EM-A1YE-01	22.0041	low	54.8333	0	FEMALE	Stage_II	advance	47	elder	wt	Unifocal
TCGA-BJ-A45G-01	17.0626	low	24.1667	0	FEMALE	Stage_III	advance	48	elder	wt	Multifocal
TCGA-FY-A3NM-01	17.0808	low	29.5	0	FEMALE	Stage_III	advance	48	elder	wt	Multifocal
TCGA-ET-A39K-01	17.3599	low	23.7	1	FEMALE	Stage_III	advance	48	elder	mut	Multifocal
TCGA-DJ-A4V4-01	18.9759	low	16.0333	0	FEMALE	Stage_I	early	48	elder	mut	Multifocal
TCGA-FY-A3NN-01	21.1766	low	0.0001	0	FEMALE	Stage_III	advance	48	elder	mut	Unifocal
TCGA-KS-A4I5-01	14.4103	low	18.9	0	FEMALE	Stage_IVA	advance	49	elder	mut	Unifocal
TCGA-DE-A3KN-01	16.6413	low	27.7	0	FEMALE	Stage_IVA	advance	49	elder	wt	Unifocal
TCGA-EM-A2CJ-01	17.8624	low	48.2333	0	FEMALE	Stage_I	early	49	elder	wt	Multifocal
TCGA-EM-A4FN-01	19.1584	low	26.7333	0	FEMALE	Stage_IVA	advance	49	elder	mut	Multifocal
TCGA-L6-A4ET-01	20.7555	low	22.1333	0	FEMALE	Stage_IVC	advance	49	elder	mut	Unifocal
TCGA-DJ-A3UU-01	21.854	low	23.7667	0	FEMALE	Stage_III	advance	49	elder	mut	Multifocal
TCGA-FK-A3SH-01	17.3263	low	48.7667	0	FEMALE	Stage_III	advance	50	elder	mut	Multifocal
TCGA-QD-A8IV-01	17.6128	low	13.0667	0	FEMALE	Stage_IVA	advance	50	elder	wt	Multifocal
TCGA-DJ-A3VE-01	19.4945	low	19.2333	0	MALE	Stage_I	early	50	elder	mut	Unifocal
TCGA-DJ-A3V9-01	19.5283	low	20.7667	0	FEMALE	Stage_IVA	advance	50	elder	mut	Multifocal
TCGA-DJ-A13R-01	19.5771	low	18.8333	0	MALE	Stage_III	advance	50	elder	wt	Multifocal
TCGA-DJ-A3UW-01	19.6429	low	60.4	0	FEMALE	Stage_I	early	50	elder	mut	Multifocal
TCGA-FY-A3R7-01	19.9101	low	16.5	0	FEMALE	Stage_III	advance	50	elder	mut	Multifocal
TCGA-EL-A3CP-01	21.9245	low	161.033	0	FEMALE	NA	NA	50	elder	mut	Multifocal
TCGA-BJ-A3PT-01	13.6982	low	23.6333	0	FEMALE	Stage_III	advance	51	elder	wt	Multifocal
TCGA-DJ-A2Q5-01	16.8998	low	38	0	MALE	Stage_IVA	advance	51	elder	mut	Unifocal
TCGA-FK-A4UB-01	19.5586	low	117.7	0	MALE	Stage_III	advance	51	elder	wt	Multifocal
TCGA-ET-A4KN-01	20.005	low	33.6333	0	FEMALE	Stage_III	advance	51	elder	wt	Unifocal
TCGA-EM-A2CS-01	20.5023	low	28.0333	0	FEMALE	Stage_IVA	advance	51	elder	mut	Multifocal
TCGA-FY-A40M-01	20.6557	low	22.8	0	FEMALE	Stage_I	early	51	elder	wt	Multifocal
TCGA-DJ-A3UR-01	21.1908	low	36.8333	0	FEMALE	Stage_III	advance	51	elder	mut	Multifocal
TCGA-DJ-A13X-01	21.6492	low	8.43333	0	FEMALE	Stage_III	advance	51	elder	mut	Unifocal
TCGA-E8-A416-01	21.68	low	31.7333	0	FEMALE	Stage_I	early	51	elder	wt	Unifocal
TCGA-BJ-A0ZH-01	17.1037	low	15.3333	0	FEMALE	Stage_IVA	advance	52	elder	mut	NA
TCGA-DJ-A13P-01	17.3119	low	171.667	0	FEMALE	Stage_II	advance	52	elder	mut	Multifocal
TCGA-DJ-A2Q7-01	19.2107	low	35.6	0	FEMALE	Stage_III	advance	52	elder	mut	Multifocal
TCGA-DJ-A3VB-01	19.3611	low	23.2333	0	MALE	Stage_III	advance	52	elder	mut	Multifocal
TCGA-E8-A2EA-01	19.8156	low	36.1667	0	FEMALE	Stage_I	early	52	elder	mut	Unifocal
TCGA-FY-A3WA-01	20.248	low	17.3	0	FEMALE	Stage_I	early	52	elder	wt	Unifocal
TCGA-DE-A4MA-01	21.4416	low	30.5333	0	FEMALE	Stage_III	advance	52	elder	mut	Unifocal
TCGA-EM-A22M-01	22.0002	low	14.7333	0	MALE	Stage_I	early	52	elder	mut	Multifocal
TCGA-DJ-A2QB-01	13.478	low	35.6667	0	FEMALE	Stage_IVA	advance	53	elder	wt	Multifocal
TCGA-EM-A1YD-01	16.0743	low	57.8	0	FEMALE	Stage_II	advance	53	elder	wt	Multifocal
TCGA-ET-A2N4-01	17.6856	low	2.7	0	FEMALE	Stage_III	advance	53	elder	mut	Multifocal
TCGA-EM-A3O6-01	9.68254	low	15.2667	0	FEMALE	Stage_II	advance	54	elder	wt	Unifocal
TCGA-BJ-A192-01	14.0442	low	44.9667	0	FEMALE	Stage_III	advance	54	elder	wt	Unifocal
TCGA-EL-A4K0-01	18.1116	low	31.4667	0	FEMALE	Stage_I	early	54	elder	mut	Unifocal
TCGA-FY-A76V-01	18.2287	low	1.7	0	MALE	Stage_II	advance	54	elder	wt	Multifocal
TCGA-KS-A4ID-01	16.5136	low	33.7	0	FEMALE	Stage_I	early	55	elder	wt	Unifocal
TCGA-BJ-A0Z0-01	17.1439	low	13.9667	0	MALE	Stage_II	advance	55	elder	wt	Unifocal
TCGA-EM-A3OA-01	17.1988	low	27.4	0	FEMALE	Stage_II	advance	55	elder	wt	Unifocal
TCGA-BJ-A0ZC-01	17.433	low	11.7333	0	MALE	Stage_I	early	55	elder	wt	NA
TCGA-FY-A40N-01	18.3455	low	19.3	0	FEMALE	Stage_I	early	55	elder	wt	Multifocal
TCGA-DJ-A2PX-01	18.8697	low	29.3667	0	FEMALE	Stage_I	early	55	elder	wt	Unifocal
TCGA-E3-A3DZ-01	19.0738	low	47.8667	0	FEMALE	Stage_III	advance	55	elder	wt	Multifocal
TCGA-EL-A4JZ-01	19.0742	low	61.8667	0	FEMALE	Stage_III	advance	55	elder	mut	Unifocal
TCGA-EL-A3MW-01	19.6173	low	110.167	0	FEMALE	Stage_II	advance	55	elder	mut	Unifocal
TCGA-DJ-A4V5-01	20.1505	low	35.8667	0	MALE	Stage_IVA	advance	55	elder	wt	Unifocal
TCGA-EL-A3T2-01	20.8289	low	30.1	1	FEMALE	Stage_III	advance	55	elder	wt	Unifocal
TCGA-EM-A1CS-01	21.9098	low	27.2333	0	FEMALE	Stage_I	early	55	elder	wt	Multifocal
TCGA-BJ-A291-01	11.0102	low	23.2	0	FEMALE	Stage_I	early	56	elder	NA	Multifocal
TCGA-DJ-A2QA-01	16.7659	low	34	0	FEMALE	Stage_III	advance	56	elder	mut	Multifocal
TCGA-E8-A434-01	18.7296	low	31.7667	0	FEMALE	Stage_I	early	56	elder	mut	Unifocal
TCGA-DJ-A13O-01	19.8247	low	38.7	0	MALE	Stage_I	early	56	elder	mut	Unifocal
TCGA-DJ-A3V0-01	20.0814	low	37.5	0	MALE	Stage_IVA	advance	56	elder	mut	Multifocal
TCGA-EM-A22J-01	20.8526	low	14.7	0	FEMALE	Stage_II	advance	56	elder	wt	Unifocal
TCGA-DJ-A2Q2-01	15.7821	low	44.5667	0	FEMALE	Stage_III	advance	57	elder	wt	Unifocal
TCGA-FY-A3R6-01	17.7668	low	14.1	0	FEMALE	Stage_IVA	advance	57	elder	wt	Multifocal
TCGA-E8-A437-01	19.5561	low	40.4333	0	FEMALE	Stage_I	early	57	elder	mut	Unifocal
TCGA-DJ-A3V3-01	19.752	low	31.0333	0	FEMALE	Stage_II	advance	57	elder	wt	Unifocal
TCGA-E3-A3E5-01	20.7528	low	40.5	0	MALE	Stage_IVA	advance	57	elder	mut	Multifocal
TCGA-E8-A3X7-01	21.0133	low	31.7	0	FEMALE	Stage_IVA	advance	57	elder	mut	Multifocal
TCGA-E8-A432-01	21.5142	low	24	1	FEMALE	Stage_II	advance	57	elder	wt	Unifocal
TCGA-DJ-A2Q0-01	22.0586	low	34.8333	0	FEMALE	Stage_II	advance	57	elder	wt	Unifocal
TCGA-DE-A69K-01	18.8044	low	14.4667	1	FEMALE	Stage_III	advance	58	elder	wt	Multifocal
TCGA-EL-A3H2-01	19.757	low	33.9667	1	MALE	Stage_II	advance	58	elder	wt	Unifocal
TCGA-L6-A4EU-01	22.028	low	9.63333	0	FEMALE	Stage_III	advance	58	elder	mut	Multifocal
TCGA-J8-A4HW-01	16.6184	low	2.63333	0	FEMALE	Stage_III	advance	59	elder	wt	Multifocal
TCGA-BJ-A45F-01	17.4335	low	3.5	0	FEMALE	Stage_I	early	59	elder	wt	Unifocal
TCGA-DJ-A3V4-01	22.247	low	43.1333	0	FEMALE	Stage_III	advance	60	elder	mut	Multifocal
TCGA-KS-A4I7-01	10.2455	low	32.9	0	FEMALE	Stage_I	early	61	elder	mut	Unifocal
TCGA-FY-A2QD-01	11.8839	low	1.26667	0	FEMALE	NA	NA	61	elder	wt	Multifocal
TCGA-FK-A3SD-01	14.8508	low	1.06667	0	FEMALE	Stage_I	early	61	elder	wt	Unifocal
TCGA-EM-A3AO-01	19.2832	low	45.1333	0	MALE	Stage_IVA	advance	61	elder	wt	Multifocal
TCGA-EL-A3D0-01	21.8807	low	141.8	0	MALE	Stage_III	advance	61	elder	mut	Unifocal
TCGA-DE-A4M8-01	22.08	low	18.8	0	FEMALE	Stage_III	advance	61	elder	wt	Multifocal
TCGA-ET-A40S-01	16.8048	low	40.7667	0	MALE	Stage_II	advance	62	elder	wt	Multifocal
TCGA-EL-A3D4-01	18.942	low	70.5333	0	MALE	Stage_IVA	advance	62	elder	wt	Multifocal
TCGA-DJ-A1QG-01	20.0686	low	45.6	0	MALE	Stage_I	early	62	elder	wt	Multifocal
TCGA-FY-A3R8-01	20.5197	low	15.9	0	FEMALE	Stage_III	advance	62	elder	mut	Unifocal
TCGA-EM-A3AK-01	21.2087	low	15.9	0	FEMALE	Stage_I	early	62	elder	mut	Multifocal
TCGA-EM-A3FL-01	13.9083	low	48.0333	0	FEMALE	Stage_I	early	63	elder	wt	Multifocal
TCGA-DJ-A1QI-01	18.1198	low	15.1667	0	FEMALE	Stage_II	advance	63	elder	mut	Multifocal
TCGA-DJ-A3VK-01	18.2697	low	25.1	0	MALE	Stage_III	advance	63	elder	wt	Multifocal
TCGA-EL-A3T3-01	18.4132	low	133.9	0	MALE	Stage_II	advance	63	elder	mut	Unifocal
TCGA-BJ-A0ZE-01	18.7427	low	16.9667	0	FEMALE	Stage_III	advance	63	elder	wt	Unifocal
TCGA-EM-A2OV-01	16.9197	low	22.4667	0	FEMALE	Stage_II	advance	64	elder	wt	Multifocal
TCGA-BJ-A3F0-01	18.0005	low	14.1333	0	FEMALE	Stage_I	early	64	elder	wt	Unifocal
TCGA-EM-A4FV-01	18.188	low	24.8	0	FEMALE	Stage_I	early	64	elder	mut	Unifocal
TCGA-FY-A3YR-01	19.5443	low	17.6	0	FEMALE	Stage_III	advance	64	elder	mut	Unifocal
TCGA-FY-A3I5-01	21.8355	low	7.93333	0	FEMALE	Stage_III	advance	64	elder	wt	Multifocal
TCGA-DJ-A2PW-01	17.7723	low	35.3333	0	MALE	Stage_III	advance	65	elder	mut	Multifocal
TCGA-BJ-A0YZ-01	18.0311	low	25.1333	0	MALE	Stage_II	advance	65	elder	wt	Unifocal
TCGA-FY-A3R9-01	11.257	low	16.8	0	FEMALE	Stage_I	early	66	elder	wt	Multifocal
TCGA-EL-A3H1-01	15.01	low	50	0	FEMALE	Stage_I	early	66	elder	wt	Unifocal
TCGA-FY-A3W9-01	17.7488	low	21.9333	0	FEMALE	Stage_II	advance	66	elder	wt	Unifocal
TCGA-EM-A2OZ-01	21.4347	low	34.4333	0	MALE	Stage_I	early	66	elder	mut	Multifocal
TCGA-EM-A3AI-01	20.5854	low	22.8333	0	FEMALE	Stage_II	advance	67	elder	wt	Multifocal
TCGA-EL-A4K1-01	16.9038	low	34.8667	0	FEMALE	Stage_III	advance	68	elder	mut	Unifocal
TCGA-ET-A3DV-01	17.6535	low	168.933	0	FEMALE	Stage_II	advance	68	elder	wt	Unifocal
TCGA-EL-A4K9-01	18.2065	low	48.5	0	MALE	Stage_II	advance	68	elder	mut	Unifocal
TCGA-EM-A22N-01	18.551	low	10.8	0	FEMALE	Stage_I	early	68	elder	wt	Multifocal
TCGA-J8-A4HY-01	19.0576	low	0.2	0	FEMALE	Stage_IVA	advance	68	elder	mut	Unifocal
TCGA-DJ-A3VM-01	19.4471	low	28	0	FEMALE	Stage_II	advance	68	elder	wt	Unifocal
TCGA-DJ-A4UL-01	21.0622	low	31.3	0	FEMALE	Stage_I	early	68	elder	mut	Multifocal
TCGA-EM-A4FH-01	17.1138	low	29.7333	0	MALE	Stage_III	advance	69	elder	wt	Multifocal
TCGA-FY-A3NP-01	19.0002	low	16.3667	0	MALE	Stage_I	early	69	elder	wt	Unifocal
TCGA-DJ-A2QC-01	16.908	low	40.5	0	FEMALE	Stage_II	advance	70	elder	mut	Unifocal
TCGA-EL-A3CL-01	17.6342	low	32.1	0	FEMALE	Stage_II	advance	70	elder	mut	Unifocal
TCGA-DJ-A2PT-01	18.4858	low	39.3667	0	FEMALE	Stage_III	advance	70	elder	mut	Unifocal
TCGA-DJ-A1QL-01	18.5348	low	17.8333	0	MALE	Stage_II	advance	70	elder	wt	Unifocal
TCGA-DJ-A2PN-01	20.6988	low	10.2333	0	FEMALE	Stage_I	early	70	elder	mut	Unifocal
TCGA-EM-A3FP-01	10.1813	low	17.6333	0	FEMALE	Stage_II	advance	71	elder	wt	Multifocal
TCGA-EM-A1YC-01	22.23	low	79.7	0	FEMALE	Stage_III	advance	71	elder	wt	Unifocal
TCGA-EL-A3GQ-01	21.7818	low	50.9333	0	FEMALE	Stage_I	early	72	elder	mut	Unifocal
TCGA-EM-A4FO-01	22.0197	low	26.7333	0	MALE	Stage_I	early	72	elder	mut	Multifocal
TCGA-EM-A1YB-01	18.3841	low	19.7333	0	FEMALE	Stage_II	advance	73	elder	wt	Multifocal
TCGA-MK-A84Z-01	14.979	low	24.2667	0	MALE	Stage_III	advance	74	elder	wt	Multifocal
TCGA-EL-A4K7-01	21.5621	low	41.7	0	MALE	Stage_III	advance	74	elder	mut	Unifocal
TCGA-FY-A4B0-01	19.78	low	14	0	MALE	Stage_I	early	76	elder	NA	Multifocal
TCGA-EM-A2CO-01	19.2283	low	6.13333	0	FEMALE	Stage_II	advance	77	elder	wt	Unifocal
TCGA-BJ-A2NA-01	19.7004	low	4.23333	1	MALE	Stage_III	advance	77	elder	mut	Multifocal
TCGA-EL-A3CR-01	16.9973	low	7.76667	0	FEMALE	Stage_III	advance	78	elder	mut	Unifocal
TCGA-EL-A3ZQ-01	19.2399	low	62.0667	0	FEMALE	Stage_II	advance	78	elder	mut	Unifocal
TCGA-EL-A3CT-01	20.7948	low	61.8	0	FEMALE	Stage_IVA	advance	78	elder	mut	Unifocal
TCGA-EL-A3ZO-01	19.6459	low	73.7	0	FEMALE	Stage_III	advance	79	elder	mut	Unifocal
TCGA-BJ-A28V-01	18.3137	low	32.9	0	FEMALE	Stage_III	advance	80	elder	wt	Multifocal
TCGA-BJ-A0ZG-01	21.8953	low	25.8333	0	MALE	Stage_I	early	80	elder	wt	NA
TCGA-ET-A39I-01	17.8088	low	33.7	0	FEMALE	Stage_I	early	83	elder	wt	Unifocal
TCGA-EM-A3AQ-01	17.8546	low	30.1333	0	FEMALE	Stage_I	early	85	elder	wt	Multifocal
TCGA-EL-A3CO-01	17.7816	low	99.1	0	MALE	Stage_III	advance	88	elder	wt	Multifocal
TCGA-E8-A2JQ-01	25.7588	high	11.8667	0	FEMALE	Stage_I	early	18	young	mut	Unifocal
TCGA-FE-A233-01	26.9964	high	18.9	1	FEMALE	Stage_I	early	18	young	mut	Unifocal
TCGA-FE-A237-01	27.9344	high	16.4	1	FEMALE	Stage_I	early	19	young	mut	Multifocal
TCGA-MK-A4N7-01	23.0494	high	32.9	0	FEMALE	Stage_I	early	20	young	mut	Unifocal
TCGA-ET-A3DU-01	23.5249	high	63.7	0	FEMALE	Stage_I	early	21	young	mut	Unifocal
TCGA-DO-A1JZ-01	23.2358	high	55.6667	0	FEMALE	Stage_I	early	23	young	wt	Unifocal
TCGA-ET-A3DT-01	25.6732	high	44.3333	0	FEMALE	Stage_I	early	23	young	mut	Unifocal
TCGA-EL-A3N2-01	24.8816	high	30.0667	0	FEMALE	Stage_I	early	24	young	mut	Unifocal
TCGA-ET-A3BX-01	27.4023	high	53.2	0	MALE	Stage_I	early	24	young	mut	Unifocal
TCGA-FE-A234-01	24.1462	high	16.1	1	FEMALE	Stage_I	early	26	young	mut	Unifocal
TCGA-ET-A2MX-01	23.048	high	89.6333	0	MALE	Stage_I	early	27	young	wt	Unifocal
TCGA-DJ-A2PR-01	25.7603	high	27.8333	0	MALE	Stage_I	early	27	young	mut	Multifocal
TCGA-FE-A23A-01	26.3204	high	82.9667	0	FEMALE	Stage_I	early	27	young	mut	Unifocal
TCGA-EL-A3CY-01	24.6628	high	4.23333	0	MALE	Stage_I	early	28	young	wt	Unifocal
TCGA-H2-A3RI-01	24.1592	high	9.3	1	FEMALE	Stage_I	early	29	young	mut	Unifocal
TCGA-FY-A3BL-01	28.6653	high	20.7	0	MALE	Stage_I	early	29	young	mut	NA
TCGA-E8-A419-01	24.7818	high	25.8	0	FEMALE	Stage_I	early	30	young	mut	Unifocal
TCGA-DE-A0Y2-01	25.929	high	21.9333	0	FEMALE	Stage_I	early	30	young	wt	Multifocal
TCGA-FE-A230-01	29.2581	high	17.5333	1	FEMALE	Stage_I	early	30	young	mut	Unifocal
TCGA-DO-A1K0-01	30.0942	high	19.2333	1	FEMALE	Stage_I	early	30	young	mut	Multifocal
TCGA-EM-A2CL-01	23.7687	high	13.3667	0	MALE	Stage_I	early	31	young	wt	Multifocal
TCGA-EL-A3GR-01	24.042	high	116.7	0	FEMALE	Stage_I	early	31	young	mut	Unifocal
TCGA-EM-A1CU-01	25.706	high	21.2	0	MALE	Stage_I	early	31	young	mut	Multifocal
TCGA-EL-A4JX-01	26.1453	high	46.6	0	FEMALE	Stage_I	early	31	young	mut	Unifocal
TCGA-EL-A3GO-01	26.1795	high	0.2	1	FEMALE	Stage_I	early	31	young	wt	Unifocal
TCGA-DJ-A4UT-01	22.9651	high	27.4333	0	FEMALE	Stage_I	early	32	young	wt	Multifocal
TCGA-BJ-A28W-01	23.8627	high	11.4667	0	FEMALE	Stage_I	early	32	young	NA	Multifocal
TCGA-IM-A3EB-01	24.6953	high	49.6	0	FEMALE	Stage_I	early	32	young	mut	Unifocal
TCGA-DJ-A3UY-01	26.2998	high	36.3667	0	FEMALE	Stage_I	early	32	young	mut	Unifocal
TCGA-DJ-A3VD-01	27.7781	high	41.2667	0	FEMALE	Stage_I	early	32	young	mut	Unifocal
TCGA-BJ-A28X-01	30.8221	high	16.4667	1	FEMALE	Stage_I	early	32	young	mut	Multifocal
TCGA-ET-A3BN-01	22.3226	high	28.6333	0	FEMALE	Stage_I	early	33	young	wt	Unifocal
TCGA-BJ-A0Z3-01	22.8698	high	16.5667	0	FEMALE	Stage_I	early	33	young	mut	Multifocal
TCGA-FE-A236-01	22.9321	high	67.7	0	MALE	Stage_I	early	33	young	mut	Multifocal
TCGA-ET-A3DO-01	23.6877	high	19	1	FEMALE	Stage_I	early	33	young	mut	Multifocal
TCGA-EM-A2P1-01	24.4082	high	12.1	1	MALE	Stage_I	early	33	young	mut	Multifocal
TCGA-GE-A2C6-01	25.7204	high	12.7	0	FEMALE	Stage_I	early	33	young	mut	Unifocal
TCGA-ET-A25M-01	27.1137	high	61.0333	0	MALE	Stage_I	early	33	young	NA	Unifocal
TCGA-J8-A3O1-01	27.6812	high	27.5667	0	FEMALE	Stage_I	early	33	young	wt	Unifocal
TCGA-EL-A4K4-01	29.5287	high	54.1	0	FEMALE	Stage_I	early	33	young	mut	Unifocal
TCGA-CE-A483-01	22.9124	high	15.2333	0	FEMALE	Stage_I	early	34	young	mut	Unifocal
TCGA-FY-A3I4-01	22.9371	high	18.0667	0	FEMALE	Stage_I	early	34	young	mut	Unifocal
TCGA-DE-A69J-01	24.8715	high	14.9	0	FEMALE	Stage_I	early	34	young	mut	Multifocal
TCGA-EL-A3H8-01	22.8738	high	152.567	0	FEMALE	Stage_I	early	35	young	mut	Multifocal
TCGA-DJ-A3UK-01	23.8715	high	37.4333	0	FEMALE	Stage_I	early	35	young	mut	Multifocal
TCGA-ET-A25O-01	24.919	high	66.2	0	FEMALE	Stage_I	early	35	young	mut	Unifocal
TCGA-MK-A4N6-01	30.6436	high	36.6	0	MALE	Stage_I	early	35	young	mut	Unifocal
TCGA-ET-A25K-01	22.2593	high	71.4	0	FEMALE	Stage_I	early	36	young	mut	Multifocal
TCGA-FE-A238-01	23.6729	high	14.3667	1	FEMALE	Stage_I	early	36	young	NA	Multifocal
TCGA-DE-A7U5-01	25.9855	high	2.8	0	FEMALE	Stage_I	early	36	young	mut	Unifocal
TCGA-EL-A3H7-01	26.1225	high	140.933	0	FEMALE	Stage_I	early	36	young	mut	Unifocal
TCGA-EL-A3GS-01	24.767	high	66.3	0	FEMALE	Stage_I	early	37	young	mut	Multifocal
TCGA-DJ-A4V2-01	23.1888	high	3.16667	0	FEMALE	Stage_I	early	38	young	mut	Unifocal
TCGA-DJ-A3UP-01	23.6785	high	16.6333	0	FEMALE	Stage_I	early	38	young	wt	Unifocal
TCGA-E8-A413-01	24.0121	high	30.4	0	FEMALE	Stage_I	early	38	young	mut	Unifocal
TCGA-E8-A417-01	24.5176	high	31.2667	0	FEMALE	Stage_I	early	38	young	mut	Unifocal
TCGA-ET-A40Q-01	25.2788	high	7.26667	1	MALE	Stage_I	early	38	young	mut	Multifocal
TCGA-EL-A3T1-01	30.8642	high	131.367	0	FEMALE	Stage_I	early	38	young	mut	Unifocal
TCGA-IM-A420-01	23.3653	high	8.33333	0	FEMALE	Stage_I	early	39	young	mut	Multifocal
TCGA-ET-A39O-01	29.2956	high	101.967	0	MALE	Stage_I	early	39	young	mut	Multifocal
TCGA-EM-A4FF-01	22.2544	high	59.5	1	FEMALE	Stage_I	early	40	young	mut	Multifocal
TCGA-EL-A3CV-01	24.3792	high	38.4667	0	MALE	Stage_I	early	40	young	mut	Multifocal
TCGA-EL-A3GY-01	27.3711	high	102.533	0	FEMALE	Stage_II	advance	40	young	mut	Unifocal
TCGA-ET-A25J-01	28.2307	high	78.6333	0	FEMALE	Stage_I	early	40	young	mut	Unifocal
TCGA-H2-A422-01	30.7218	high	18.8667	0	FEMALE	Stage_I	early	40	young	mut	Unifocal
TCGA-KS-A4I3-01	24.0994	high	44.3	0	MALE	Stage_I	early	41	young	mut	Unifocal
TCGA-KS-A4IB-01	24.9854	high	85.9	0	FEMALE	Stage_I	early	41	young	mut	Unifocal
TCGA-EL-A3ZK-01	25.5089	high	52.5	0	FEMALE	Stage_I	early	41	young	wt	Unifocal
TCGA-EL-A3GX-01	29.524	high	14.6333	1	FEMALE	Stage_I	early	41	young	mut	Unifocal
TCGA-EM-A4FQ-01	23.3848	high	22.7667	0	FEMALE	Stage_I	early	42	young	mut	Multifocal
TCGA-BJ-A2N9-01	24.4378	high	7.5	1	FEMALE	Stage_I	early	42	young	wt	Unifocal
TCGA-EM-A3SU-01	22.7117	high	30.3667	0	FEMALE	Stage_I	early	43	young	mut	Multifocal
TCGA-ET-A3DP-01	23.4905	high	95.9	0	FEMALE	Stage_I	early	43	young	mut	Unifocal
TCGA-DJ-A1QQ-01	27.4974	high	17.8	0	MALE	Stage_I	early	43	young	mut	Multifocal
TCGA-DE-A4MC-01	31.1653	high	11.0667	1	FEMALE	Stage_I	early	43	young	mut	Unifocal
TCGA-FE-A232-01	25.3883	high	80.8	0	FEMALE	Stage_I	early	44	young	mut	Unifocal
TCGA-ET-A3BO-01	29.8015	high	51.1	0	FEMALE	Stage_I	early	44	young	mut	Multifocal
TCGA-DJ-A3UQ-01	28.9471	high	19.8333	0	FEMALE	Stage_III	advance	45	young	mut	Multifocal
TCGA-BJ-A28Z-01	23.5138	high	11.2333	0	FEMALE	Stage_III	advance	46	elder	wt	Multifocal
TCGA-BJ-A45E-01	24.1647	high	21.3	0	FEMALE	Stage_I	early	46	elder	wt	Unifocal
TCGA-DJ-A3UX-01	26.4034	high	11.5	0	FEMALE	Stage_I	early	46	elder	mut	Unifocal
TCGA-EL-A3H4-01	27.8008	high	50.4	0	FEMALE	Stage_IVA	advance	46	elder	mut	Unifocal
TCGA-EL-A3TB-01	23.5875	high	83.9667	0	FEMALE	Stage_III	advance	47	elder	wt	Unifocal
TCGA-EL-A3T7-01	23.734	high	41.8667	0	FEMALE	Stage_II	advance	47	elder	mut	Unifocal
TCGA-EM-A2P3-01	24.4192	high	14.8	0	FEMALE	Stage_I	early	47	elder	mut	Multifocal
TCGA-ET-A3BV-01	24.8237	high	40.1333	1	FEMALE	Stage_III	advance	47	elder	mut	Unifocal
TCGA-EL-A3CN-01	25.4545	high	157.7	0	FEMALE	Stage_II	advance	47	elder	mut	Unifocal
TCGA-L6-A4EQ-01	25.9728	high	40.9333	0	MALE	Stage_III	advance	47	elder	mut	Unifocal
TCGA-BJ-A4O8-01	28.5097	high	19.7	0	MALE	Stage_III	advance	47	elder	mut	Multifocal
TCGA-E3-A3E3-01	23.8156	high	14.8333	1	FEMALE	Stage_II	advance	49	elder	mut	Multifocal
TCGA-DO-A2HM-01	30.546	high	2.36667	0	MALE	Stage_IVA	advance	49	elder	wt	Unifocal
TCGA-E8-A44K-01	24.6017	high	31.4333	0	FEMALE	Stage_I	early	50	elder	mut	Unifocal
TCGA-ET-A2N0-01	22.6314	high	53.3333	0	FEMALE	Stage_III	advance	51	elder	mut	Unifocal
TCGA-EL-A3D6-01	22.7468	high	109.867	0	FEMALE	Stage_III	advance	51	elder	mut	Unifocal
TCGA-CE-A3ME-01	22.9601	high	12.6333	0	FEMALE	Stage_II	advance	51	elder	mut	Unifocal
TCGA-DJ-A3UN-01	23.3154	high	32.8667	0	FEMALE	Stage_I	early	51	elder	mut	Multifocal
TCGA-FY-A4B3-01	23.5014	high	14.2333	0	MALE	Stage_III	advance	51	elder	mut	Multifocal
TCGA-BJ-A3EZ-01	24.7126	high	16.2333	0	MALE	Stage_IVA	advance	51	elder	mut	Multifocal
TCGA-BJ-A4O9-01	25.0603	high	23.8	0	FEMALE	Stage_II	advance	51	elder	mut	Unifocal
TCGA-BJ-A45I-01	26.0376	high	3.66667	1	FEMALE	Stage_III	advance	51	elder	mut	Multifocal
TCGA-ET-A25R-01	30.1504	high	64.3333	0	FEMALE	Stage_III	advance	51	elder	mut	Unifocal
TCGA-DJ-A3VI-01	22.8589	high	3.16667	0	FEMALE	Stage_III	advance	52	elder	mut	Multifocal
TCGA-EM-A22I-01	23.1298	high	14.9333	0	FEMALE	Stage_III	advance	52	elder	mut	Multifocal
TCGA-BJ-A3PU-01	23.3112	high	5.8	1	MALE	Stage_III	advance	52	elder	mut	Unifocal
TCGA-J8-A3NZ-01	23.9703	high	17.4667	0	FEMALE	Stage_III	advance	52	elder	mut	Unifocal
TCGA-DJ-A2PU-01	23.981	high	34.4333	0	FEMALE	Stage_II	advance	52	elder	mut	Multifocal
TCGA-ET-A25L-01	24.2307	high	57.3667	0	FEMALE	Stage_IVA	advance	52	elder	NA	Unifocal
TCGA-DJ-A2Q4-01	23.2849	high	34.4	0	MALE	Stage_III	advance	53	elder	mut	Multifocal
TCGA-DJ-A2PV-01	23.3986	high	32.4333	0	FEMALE	Stage_II	advance	53	elder	mut	Multifocal
TCGA-E8-A436-01	24.2143	high	15.1667	0	FEMALE	Stage_IVA	advance	53	elder	mut	Multifocal
TCGA-EL-A3N3-01	25.8034	high	180.767	0	FEMALE	Stage_II	advance	53	elder	mut	Unifocal
TCGA-DJ-A2PO-01	27.8879	high	8.1	0	MALE	Stage_I	early	54	elder	wt	Multifocal
TCGA-DJ-A3V6-01	28.2268	high	27.2667	0	MALE	Stage_III	advance	54	elder	mut	Multifocal
TCGA-J8-A3YG-01	29.3095	high	22.6	0	FEMALE	Stage_III	advance	54	elder	mut	Multifocal
TCGA-H2-A26U-01	29.97	high	17.2333	0	FEMALE	Stage_III	advance	54	elder	mut	Multifocal
TCGA-FY-A40L-01	22.3225	high	24.2	0	FEMALE	Stage_IVA	advance	55	elder	mut	Multifocal
TCGA-ET-A39T-01	23.6019	high	99.5667	0	FEMALE	Stage_III	advance	55	elder	mut	Unifocal
TCGA-EM-A3FR-01	23.7722	high	15.2333	0	FEMALE	Stage_III	advance	55	elder	wt	Multifocal
TCGA-BJ-A190-01	24.1007	high	20.8667	0	MALE	Stage_II	advance	55	elder	NA	Multifocal
TCGA-IM-A3U3-01	26.0563	high	17.1333	0	FEMALE	Stage_I	early	55	elder	mut	Multifocal
TCGA-E8-A242-01	26.3406	high	31.6667	0	FEMALE	Stage_III	advance	56	elder	mut	Unifocal
TCGA-ET-A25G-01	26.7652	high	83.0667	0	FEMALE	Stage_III	advance	56	elder	mut	Unifocal
TCGA-EL-A3H5-01	23.6322	high	84.7333	0	FEMALE	Stage_IVA	advance	57	elder	mut	Multifocal
TCGA-BJ-A0Z2-01	25.6089	high	5.26667	1	MALE	Stage_IVC	advance	57	elder	wt	Unifocal
TCGA-BJ-A0Z9-01	27.9154	high	41.9	0	FEMALE	Stage_III	advance	57	elder	mut	Multifocal
TCGA-EM-A3FM-01	30.1083	high	17.1333	1	MALE	Stage_IVA	advance	57	elder	mut	Multifocal
TCGA-IM-A3ED-01	23.9626	high	48.0667	0	FEMALE	Stage_I	early	58	elder	mut	Unifocal
TCGA-BJ-A0Z5-01	24.0006	high	14.9333	0	MALE	Stage_III	advance	58	elder	NA	NA
TCGA-BJ-A18Z-01	24.5754	high	42.1	0	MALE	Stage_IVA	advance	58	elder	mut	Multifocal
TCGA-DJ-A1QH-01	29.0403	high	43.1	0	FEMALE	Stage_III	advance	58	elder	mut	Unifocal
TCGA-EM-A4FM-01	22.9641	high	5.4	0	FEMALE	Stage_IVA	advance	59	elder	mut	Multifocal
TCGA-EL-A3ZM-01	22.7289	high	36.5333	0	MALE	Stage_IVA	advance	60	elder	NA	Unifocal
TCGA-DJ-A3VF-01	23.3828	high	9.73333	0	FEMALE	Stage_IVA	advance	60	elder	mut	Multifocal
TCGA-ET-A3BT-01	26.4068	high	8.9	1	FEMALE	Stage_IVA	advance	60	elder	mut	Unifocal
TCGA-DJ-A13U-01	30.6732	high	53	0	MALE	Stage_III	advance	60	elder	mut	Unifocal
TCGA-DE-A0Y3-01	32.8552	high	1	1	FEMALE	Stage_IVC	advance	60	elder	mut	Multifocal
TCGA-FY-A3TY-01	22.842	high	23.6333	0	FEMALE	Stage_III	advance	61	elder	mut	Unifocal
TCGA-DJ-A1QF-01	25.6318	high	31.0333	0	FEMALE	Stage_II	advance	61	elder	mut	Multifocal
TCGA-DJ-A2Q3-01	26.5913	high	12.8333	1	FEMALE	Stage_III	advance	61	elder	mut	Unifocal
TCGA-FE-A22Z-01	29.9843	high	40.5	1	FEMALE	Stage_IVA	advance	61	elder	mut	Unifocal
TCGA-EL-A3CS-01	22.4041	high	46.1667	1	FEMALE	Stage_IVA	advance	62	elder	mut	Unifocal
TCGA-EM-A3ST-01	22.7772	high	32.2	1	FEMALE	Stage_III	advance	62	elder	wt	Multifocal
TCGA-EM-A2CN-01	24.2307	high	23.8333	0	MALE	Stage_IVC	advance	62	elder	wt	Unifocal
TCGA-FY-A4B4-01	24.9181	high	21.9	0	FEMALE	Stage_III	advance	62	elder	mut	Unifocal
TCGA-DJ-A1QE-01	28.5952	high	137.8	0	FEMALE	Stage_III	advance	62	elder	mut	Unifocal
TCGA-DJ-A3UO-01	23.7411	high	21.3667	1	MALE	Stage_IVA	advance	63	elder	mut	Multifocal
TCGA-DJ-A2PZ-01	24.0827	high	8.53333	0	MALE	Stage_III	advance	63	elder	mut	Unifocal
TCGA-EL-A4KI-01	24.1374	high	8.83333	1	MALE	Stage_III	advance	63	elder	wt	Multifocal
TCGA-EM-A22P-01	22.6194	high	41.8667	0	MALE	Stage_IVA	advance	64	elder	mut	Multifocal
TCGA-ET-A3DW-01	26.1987	high	25.0667	0	MALE	Stage_III	advance	64	elder	mut	Unifocal
TCGA-EL-A3CM-01	29.7663	high	27.1	0	FEMALE	Stage_III	advance	64	elder	mut	Unifocal
TCGA-DE-A0XZ-01	22.389	high	6.8	1	FEMALE	Stage_III	advance	65	elder	mut	Multifocal
TCGA-EL-A3GV-01	22.7693	high	51.0667	0	FEMALE	Stage_III	advance	65	elder	mut	Unifocal
TCGA-DJ-A2Q9-01	23.7837	high	36.4	0	FEMALE	Stage_III	advance	65	elder	wt	Multifocal
TCGA-EL-A3MX-01	22.8321	high	56.9333	1	FEMALE	Stage_IVC	advance	66	elder	mut	Unifocal
TCGA-EL-A3MZ-01	27.5744	high	53.2333	0	MALE	Stage_III	advance	66	elder	mut	Unifocal
TCGA-BJ-A0ZB-01	32.1526	high	4.06667	0	MALE	Stage_IVA	advance	66	elder	mut	Unifocal
TCGA-BJ-A0ZA-01	22.6511	high	19.1333	0	FEMALE	Stage_II	advance	67	elder	wt	Multifocal
TCGA-BJ-A3PR-01	24.7203	high	36.9	0	FEMALE	Stage_I	early	69	elder	wt	Unifocal
TCGA-DJ-A1QO-01	29.9071	high	35.4	1	MALE	Stage_III	advance	69	elder	mut	Multifocal
TCGA-EL-A3T9-01	30.4695	high	5.8	1	FEMALE	Stage_IV	advance	69	elder	wt	Unifocal
TCGA-EL-A3GP-01	23.9617	high	50.2	0	MALE	Stage_III	advance	70	elder	mut	Unifocal
TCGA-EL-A3CU-01	24.4722	high	159.333	0	FEMALE	Stage_III	advance	70	elder	mut	Multifocal
TCGA-DJ-A3UZ-01	25.7787	high	41.5333	0	FEMALE	Stage_III	advance	70	elder	wt	Multifocal
TCGA-BJ-A290-01	26.6501	high	10.9667	1	MALE	Stage_III	advance	70	elder	mut	Unifocal
TCGA-FE-A231-01	30.9144	high	32.0333	0	MALE	Stage_IVA	advance	70	elder	mut	Unifocal
TCGA-DE-A4MD-01	33.7816	high	8.9	1	MALE	Stage_IVA	advance	71	elder	mut	Unifocal
TCGA-EL-A3GU-01	23.2677	high	18.1333	1	FEMALE	Stage_III	advance	72	elder	mut	Unifocal
TCGA-ET-A2MY-01	28.2333	high	59.5667	0	FEMALE	Stage_I	early	72	elder	mut	Unifocal
TCGA-ET-A39P-01	23.5908	high	96.6667	0	FEMALE	Stage_III	advance	73	elder	mut	Unifocal
TCGA-EM-A1YA-01	25.4147	high	20.0667	0	FEMALE	Stage_II	advance	74	elder	wt	Unifocal
TCGA-4C-A93U-01	26.8513	high	4.3	0	FEMALE	Stage_IVA	advance	74	elder	mut	Unifocal
TCGA-E8-A418-01	22.8652	high	3.06667	0	FEMALE	Stage_IVA	advance	75	elder	mut	Unifocal
TCGA-EL-A4K6-01	27.5169	high	29.1333	1	MALE	Stage_IV	advance	75	elder	wt	Unifocal
TCGA-EM-A22O-01	28.1657	high	44.8	0	MALE	Stage_IVA	advance	75	elder	mut	Multifocal
TCGA-DJ-A3V5-01	26.7606	high	19.4667	0	FEMALE	Stage_III	advance	76	elder	mut	Unifocal
TCGA-EM-A1CT-01	29.7225	high	18.4333	0	MALE	Stage_IVA	advance	76	elder	mut	Unifocal
TCGA-BJ-A45C-01	25.1991	high	8.1	1	MALE	Stage_III	advance	78	elder	NA	Multifocal
TCGA-DE-A4MB-01	23.9475	high	11.7333	0	FEMALE	Stage_IVA	advance	79	elder	mut	Multifocal
TCGA-BJ-A28S-01	23.9908	high	21.3333	0	MALE	Stage_II	advance	79	elder	wt	Multifocal
TCGA-EL-A3MY-01	24.2286	high	17.7667	1	MALE	Stage_IVC	advance	81	elder	mut	Unifocal
TCGA-FE-A239-01	28.4293	high	31.1	1	MALE	Stage_III	advance	82	elder	NA	Unifocal
TCGA-EM-A3O3-01	24.5414	high	14.7	0	FEMALE	Stage_III	advance	83	elder	mut	Unifocal
TCGA-J8-A3YF-01	25.4709	high	25.0333	0	MALE	Stage_III	advance	83	elder	mut	Multifocal
TCGA-DJ-A13L-01	22.3637	high	10.1	0	MALE	Stage_I	early	85	elder	mut	Multifocal
TCGA-EL-A3CW-01	22.2809	high	57.8	0	FEMALE	Stage_III	advance	87	elder	wt	Unifocal
TCGA-IM-A3U2-01	24.5903	high	18.7667	0	FEMALE	Stage_IVA	advance	89	elder	mut	Multifocal

## Sheet: Table S7
Table S7_Drug_targets_summary
Agent.names	Target.genes
1,4-butanediol	MAN1B1
1,4-butanediol	PLA2G2A
1,4-butanediol	PLA2G2E
12-O-tetradecanoylphorbol-13-acetate	KCNT2
12-O-tetradecanoylphorbol-13-acetate	TRPV4
1400W	NOS1
1400W	NOS2
1400W	NOS3
17-hydroxyprogesterone-caproate	AR
17-hydroxyprogesterone-caproate	ESR1
17-hydroxyprogesterone-caproate	ESR2
17-hydroxyprogesterone-caproate	NR1H4
17-hydroxyprogesterone-caproate	NR1I2
17-hydroxyprogesterone-caproate	NR3C1
17-hydroxyprogesterone-caproate	PGR
1-azakenpaullone	CCNB1
1-azakenpaullone	CDK1
1-azakenpaullone	CDK5
1-azakenpaullone	GSK3B
1-EBIO	KCNN1
1-EBIO	KCNN2
1-EBIO	KCNN3
1-EBIO	KCNN4
1-hexadecanal	DBI
1-hexadecanal	RHO
1-octanol	GJA1
1-octanol	GJA10
1-octanol	GJA3
1-octanol	GJA4
1-octanol	GJA5
1-octanol	GJA8
1-octanol	GJA9
1-octanol	GJB1
1-octanol	GJB2
1-octanol	GJB3
1-octanol	GJB4
1-octanol	GJB5
1-octanol	GJB6
1-octanol	GJB7
1-octanol	GJC1
1-octanol	GJC2
1-octanol	GJC3
1-octanol	GJD2
1-octanol	GJD3
1-octanol	GJD4
1-octanol	GJE1
1-phenylbiguanide	HTR3A
1-phenylbiguanide	HTR3B
1s,2r-phenylpropanolamine	ADRA1A
1s,2r-phenylpropanolamine	ADRA2A
1s,2r-phenylpropanolamine	ADRB1
1s,2r-phenylpropanolamine	ADRB2
1s,2r-phenylpropanolamine	DRD1
2-aminobenzenesulfonamide	CA12
2-aminobenzenesulfonamide	CA14
2-aminobenzenesulfonamide	CA2
2-aminobenzenesulfonamide	CA6
2-aminobenzenesulfonamide	CA9
2-APB	TRPC1
2-APB	TRPC3
2-APB	TRPC4
2-APB	TRPC5
2-APB	TRPC6
2-APB	TRPC7
2-APB	TRPM2
2-APB	TRPM3
2-APB	TRPM6
2-APB	TRPV1
2-APB	TRPV6
2-BFI	ADRA2A
2-BFI	ADRA2B
2-BFI	ADRA2C
2-BFI	MAOA
2-BFI	MAOB
2-chloroadenosine	ADORA1
2-chloroadenosine	ADORA2A
2-chloroadenosine	ADORA2B
2-chloro-N6-cyclopentyladenosine	ADORA1
2-chloro-N6-cyclopentyladenosine	ADORA2A
2-chloro-N6-cyclopentyladenosine	ADORA2B
2-chloro-N6-cyclopentyladenosine	ADORA3
2-CMDO	DRD2
2-CMDO	DRD4
2-deoxyglucose	SLC2A1
2-deoxyglucose	SLC2A2
2-deoxyglucose	SLC2A3
2-deoxyglucose	SLC2A4
2-hydroxysaclofen	GABBR1
2-hydroxysaclofen	GABBR2
2-iminobiotin	NOS1
2-iminobiotin	NOS2
2-iodomelatonin	MTNR1A
2-iodomelatonin	MTNR1B
2-iodomelatonin	NQO2
2-methoxyestradiol	COMT
2-methoxyestradiol	CYP19A1
2-methoxyestradiol	CYP1A1
2-methoxyestradiol	CYP1B1
2-methoxyestradiol	HIF1A
2-methoxyestradiol	TUBB
2-methyl-5-hydroxytryptamine	HTR1B
2-methyl-5-hydroxytryptamine	HTR1D
2-methyl-5-hydroxytryptamine	HTR1E
2-methyl-5-hydroxytryptamine	HTR1F
2-methyl-5-hydroxytryptamine	HTR3A
2-methyl-5-hydroxytryptamine	HTR3B
2-methyl-5-hydroxytryptamine	HTR6
2-oxopropanoate	ABAT
2-oxopropanoate	AGXT2
2-oxopropanoate	PC
2-oxopropanoate	PDHB
2-oxopropanoate	PKLR
2-oxopropanoate	PKM
2-oxopropanoate	SLC16A1
2-oxopropanoate	SLC16A2
2-oxopropanoate	SLC16A3
2-oxopropanoate	SLC16A4
2-oxopropanoate	SLC16A5
2-oxopropanoate	SLC16A6
2-oxopropanoate	SLC16A7
2-oxopropanoate	SLC16A8
2-phenylmelatonin	MTNR1A
2-phenylmelatonin	MTNR1B
3,3'-diindolylmethane	AR
3,3'-diindolylmethane	HIF1A
3,3'-diindolylmethane	IFNG
3,3'-diindolylmethane	PI3
3-alpha-bis-(4-fluorophenyl)-methoxytropane	CHRM1
3-alpha-bis-(4-fluorophenyl)-methoxytropane	SLC6A2
3-alpha-bis-(4-fluorophenyl)-methoxytropane	SLC6A3
3-alpha-bis-(4-fluorophenyl)-methoxytropane	SLC6A4
3-bromo-7-nitroindazole	NOS1
3-bromo-7-nitroindazole	NOS2
3-bromo-7-nitroindazole	NOS3
3-carboxy-4-hydroxyphenylglycine-(R)	GRIN1
3-carboxy-4-hydroxyphenylglycine-(R)	GRIN2A
3-carboxy-4-hydroxyphenylglycine-(R)	GRIN2B
3-carboxy-4-hydroxyphenylglycine-(R)	GRIN2C
3-carboxy-4-hydroxyphenylglycine-(S)	GRM1
3-carboxy-4-hydroxyphenylglycine-(S)	GRM5
3-indolebutyric-acid	B2M
3-indolebutyric-acid	HLA-A
3-indolebutyric-acid	TRAC
3-indolebutyric-acid	TRBC1
4,5,6,7-tetrabromobenzotriazole	AKT1
4,5,6,7-tetrabromobenzotriazole	CHEK1
4,5,6,7-tetrabromobenzotriazole	CSNK2A1
4,5,6,7-tetrabromobenzotriazole	GSK3B
4,5,6,7-tetrabromobenzotriazole	LCK
4,5,6,7-tetrabromobenzotriazole	MAP2K1
4,5,6,7-tetrabromobenzotriazole	MAPK1
4,5,6,7-tetrabromobenzotriazole	MAPK11
4,5,6,7-tetrabromobenzotriazole	MAPK12
4,5,6,7-tetrabromobenzotriazole	MAPK14
4,5,6,7-tetrabromobenzotriazole	MAPK8
4,5,6,7-tetrabromobenzotriazole	PRKCA
4,5,6,7-tetrabromobenzotriazole	ROCK1
4,5,6,7-tetrabromobenzotriazole	RPS6KB1
4,5,6,7-tetrabromobenzotriazole	SGK1
4-carboxy-3-hydroxyphenylglycine-(S)	GRM1
4-carboxy-3-hydroxyphenylglycine-(S)	GRM2
4-DAMP	CHRM1
4-DAMP	CHRM2
4-DAMP	CHRM3
4-DAMP	CHRM4
4-DAMP	CHRM5
4E1RCat	EIF4E
4E1RCat	EIF4G1
4-methylgenistein	CYP19A1
4-methylgenistein	ESRRA
4-methylgenistein	ESRRB
4-methylgenistein	ESRRG
4-methylgenistein	FASN
4-P-PDOT	MTNR1A
4-P-PDOT	MTNR1B
5,7-dichlorokynurenic-acid	GLRA2
5,7-dichlorokynurenic-acid	GRIN1
5,7-dichlorokynurenic-acid	GRIN2A
5,7-dichlorokynurenic-acid	GRIN2B
5,7-dichlorokynurenic-acid	GRIN2C
5,7-dichlorokynurenic-acid	GRIN2D
5-carboxamidotryptamine	HTR1A
5-carboxamidotryptamine	HTR1B
5-carboxamidotryptamine	HTR1D
5-carboxamidotryptamine	HTR1E
5-carboxamidotryptamine	HTR1F
5-carboxamidotryptamine	HTR2A
5-carboxamidotryptamine	HTR2B
5-carboxamidotryptamine	HTR2C
5-carboxamidotryptamine	HTR5A
5-carboxamidotryptamine	HTR6
5-carboxamidotryptamine	HTR7
5-fluorouracil	DPYD
5-fluorouracil	TYMS
5-hydroxytryptophan	SLC36A1
5-hydroxytryptophan	SLC36A2
5-methylfurmethiodide	CHRM1
5-methylfurmethiodide	CHRM2
5-methylfurmethiodide	CHRM3
5-methylfurmethiodide	CHRM4
6-chloromelatonin	MTNR1A
6-chloromelatonin	MTNR1B
7-chlorokynurenic-acid	GRIN1
7-chlorokynurenic-acid	GRIN2A
7-chlorokynurenic-acid	GRIN2B
7-chlorokynurenic-acid	GRIN2C
7-hydroxy-DPAT	DRD2
7-hydroxy-DPAT	DRD3
7-hydroxystaurosporine	CHEK1
7-hydroxystaurosporine	MARK3
7-hydroxystaurosporine	PDPK1
7-nitroindazole	NOS1
7-nitroindazole	NOS2
7-nitroindazole	NOS3
8-hydroxy-DPAT	CDK1
8-hydroxy-DPAT	CHEK1
8-hydroxy-DPAT	CHEK2
8-hydroxy-DPAT	GSK3B
8-hydroxy-DPAT	HTR5A
8-hydroxy-DPAT	HTR7
8-hydroxy-DPAT	LCK
8-hydroxy-DPAT	MAPK14
8-hydroxy-DPAT	MARK1
8-hydroxy-DPAT	PDPK1
8-hydroxy-DPAT	PRKCA
8-hydroxy-DPAT	PRKCB
8-hydroxy-DPAT	PRKCD
8-hydroxy-DPAT	PRKCE
8-hydroxy-DPAT	PRKCG
8-hydroxy-PIPAT	DRD2
8-hydroxy-PIPAT	DRD3
8-M-PDOT	MTNR1A
8-M-PDOT	MTNR1B
9-anthracenecarboxylic-acid	ANO1
9-anthracenecarboxylic-acid	CLCN1
A-1070722	GSK3A
A-1070722	GSK3B
A205804	ICAM1
A205804	SELE
A-366	EHMT1
A-366	EHMT2
A-61603	ADRA1A
A-61603	ADRA1B
A-61603	ADRA1D
A-674563	AKT1
A-674563	PKIA
A-674563	PRKACA
A-867744	CHRNA3
A-867744	CHRNA4
A-867744	CHRNA7
A-987306	ADORA1
A-987306	AVPR1A
A-987306	CCR1
A-987306	CHRM1
A-987306	CHRM2
A-987306	CHRM3
A-987306	CHRM4
A-987306	DRD3
A-987306	HTR1A
A-987306	HTR1B
A-987306	HTR2A
A-987306	HTR2B
A-987306	HTR3A
A-987306	TACR2
AA-29504	GABRA1
AA-29504	GABRA4
AA-29504	GABRB3
abamectin	GABBR1
abamectin	GABBR2
abemaciclib	CDK4
abemaciclib	CDK6
abiraterone	CYP11B1
abiraterone	CYP17A1
ABT-239	HRH1
ABT-239	HRH2
ABT-239	HRH3
ABT-639	CACNA1G
ABT-639	CACNA1H
ABT-639	CACNA1I
ABT-737	BCL2
ABT-737	BCL2L1
ABT-737	BCL2L2
AC-55649	RARA
AC-55649	RARB
AC-710	CSF1R
AC-710	FLT3
AC-710	KIT
AC-710	PDGFRA
AC-710	PDGFRB
acalisib	PIK3CB
acalisib	PIK3CD
acamprosate	GABRA1
acamprosate	GABRA2
acamprosate	GABRA3
acamprosate	GABRA4
acamprosate	GABRA5
acamprosate	GABRA6
acamprosate	GABRB1
acamprosate	GABRB2
acamprosate	GABRB3
acamprosate	GABRD
acamprosate	GABRE
acamprosate	GABRG1
acamprosate	GABRG2
acamprosate	GABRG3
acamprosate	GABRP
acamprosate	GABRQ
acamprosate	GRIN1
acamprosate	GRIN2A
acamprosate	GRIN2B
acamprosate	GRIN2C
acamprosate	GRIN2D
acamprosate	GRIN3A
acamprosate	GRIN3B
acamprosate	GRM5
acarbose	AMY2A
acarbose	GAA
acarbose	MGAM
acarbose	SI
acebutolol	ADRB1
acebutolol	ADRB2
aceclidine	CHRM1
aceclidine	CHRM2
aceclidine	CHRM3
aceclidine	CHRM4
aceclidine	CHRM5
acemetacin	PTGS1
acemetacin	PTGS2
aceneuramic-acid	AZGP1
aceneuramic-acid	CES1
aceneuramic-acid	MBL2
aceneuramic-acid	REG1A
aceneuramic-acid	SELE
aceneuramic-acid	SELP
aceneuramic-acid	SIGLEC1
acepromazine	ADRA1A
acepromazine	ADRA1B
acepromazine	DRD1
acepromazine	DRD2
acepromazine	HTR1A
acepromazine	HTR2A
acetazolamide	AQP1
acetazolamide	CA1
acetazolamide	CA12
acetazolamide	CA14
acetazolamide	CA2
acetazolamide	CA3
acetazolamide	CA4
acetazolamide	CA7
acetohexamide	ABCC8
acetohexamide	KCNJ1
acetohexamide	KCNJ10
acetohexamide	KCNJ11
acetophenazine	DRD1
acetophenazine	DRD2
acetyl-11-keto-beta-boswellic-acid	HSD11B1
acetyl-11-keto-beta-boswellic-acid	HSD11B2
acetylcholine	ACHE
acetylcholine	CHRM1
acetylcholine	CHRM2
acetylcholine	CHRM3
acetylcholine	CHRM4
acetylcholine	CHRM5
acetylcholine	CHRNA2
acetylcysteine	ACY1
acetylcysteine	CHUK
acetylcysteine	GRIN1
acetylcysteine	GRIN2A
acetylcysteine	GRIN2B
acetylcysteine	GRIN2D
acetylcysteine	GRIN3A
acetylcysteine	GSS
acetylcysteine	IKBKB
acetylcysteine	RELA
acetylcysteine	SLC7A11
acifran	HCAR2
acifran	HCAR3
acitretin	RARA
acitretin	RARB
acitretin	RARG
acitretin	RBP1
acitretin	RXRA
acitretin	RXRB
acitretin	RXRG
acitretin	STAT3
aclarubicin	TOP1
aclarubicin	TOP2A
aclidinium	CHRM1
aclidinium	CHRM2
aclidinium	CHRM3
aclidinium	CHRM4
aclidinium	CHRM5
ACT-132577	EDNRA
ACT-132577	EDNRB
ACT-462206	HCRTR1
ACT-462206	HCRTR2
ACTB-1003	KDR
ACTB-1003	TEK
ACY-1215	HDAC1
ACY-1215	HDAC2
ACY-1215	HDAC3
ACY-1215	HDAC6
ACY-1215	HDAC8
adapalene	RARA
adapalene	RARB
adapalene	RARG
adapalene	RXRA
adapalene	RXRB
adapalene	RXRG
adaprev	IGF2R
adaprev	M6PR
adarotene	RARB
adarotene	RARG
adatanserin	HTR1A
adatanserin	HTR2A
ademetionine	AMD1
ademetionine	CBS
ademetionine	COMT
ademetionine	GNMT
ademetionine	MAT1A
ademetionine	MAT2A
adenine	ACACB
adenine	ACP1
adenine	APRT
adenine	MTAP
adenine	PECR
adenine	SRPK2
adenosine	ADORA1
adenosine	ADORA2A
adenosine	ADORA2B
adenosine	ADORA3
adenosine	PI4K2A
adenosine	PI4K2B
adenosine	TRPM4
adenosine-phosphate	ACSL1
adenosine-phosphate	ACSS1
adenosine-phosphate	ACSS2
adenosine-phosphate	ADCY1
adenosine-phosphate	ADK
adenosine-phosphate	CREB1
adenosine-phosphate	FBP1
adenosine-phosphate	HINT1
adenosine-phosphate	PDE4B
adenosine-phosphate	PDE4D
adenosine-phosphate	PIM1
adenosine-phosphate	PRKAA1
adenosine-phosphate	PRKAB1
adenosine-phosphate	PRKAB2
adenosine-phosphate	PYGL
adenosine-phosphate	TRPM4
adenosine-triphosphate	ABCA1
adenosine-triphosphate	ABCB1
adenosine-triphosphate	ABCB11
adenosine-triphosphate	ABCC2
adenosine-triphosphate	ABCC8
adenosine-triphosphate	ABCC9
adenosine-triphosphate	ABCG1
adenosine-triphosphate	ABL1
adenosine-triphosphate	ABL2
adenosine-triphosphate	ACSL1
adenosine-triphosphate	ACSS1
adenosine-triphosphate	ACSS2
adenosine-triphosphate	ACVR1
adenosine-triphosphate	ACVR1B
adenosine-triphosphate	ACVRL1
adenosine-triphosphate	ADCY1
adenosine-triphosphate	ADRBK1
adenosine-triphosphate	ADRBK2
adenosine-triphosphate	AFG3L2
adenosine-triphosphate	AKT1
adenosine-triphosphate	ALK
adenosine-triphosphate	AMHR2
adenosine-triphosphate	APAF1
adenosine-triphosphate	ARAF
adenosine-triphosphate	ASNA1
adenosine-triphosphate	ASNS
adenosine-triphosphate	ASS1
adenosine-triphosphate	CDK15
adenosine-triphosphate	GPR17
adenosine-triphosphate	ITPR1
adenosine-triphosphate	NAE1
adenosine-triphosphate	NT5C2
adenosine-triphosphate	P2RY1
adenosine-triphosphate	P2RY11
adenosine-triphosphate	P2RY13
adenosine-triphosphate	P2RY2
adenosine-triphosphate	P2RY4
adenosine-triphosphate	PRKAA1
adenosine-triphosphate	RYR1
adenosine-triphosphate	RYR2
adenosine-triphosphate	RYR3
adenosine-triphosphate	SLC25A4
adenosine-triphosphate	TNK2
adenosine-triphosphate	TRPM4
adenosine-triphosphate	TRPM7
adiporon	ADIPOR1
adiporon	ADIPOR2
adoprazine	DRD2
adoprazine	HTR1A
adrenosterone	HSD11B1
adrenosterone	HSD11B2
AEE788	EGFR
AEE788	ERBB2
AEE788	ERBB4
AEE788	FGFR2
AEE788	FGFR3
AEE788	KDR
afatinib	EGFR
afatinib	ERBB2
afatinib	ERBB4
afimoxifene	ESR1
afimoxifene	ESR2
afimoxifene	ESRRG
afimoxifene	PLD1
afimoxifene	PRKCD
afimoxifene	PRKCE
afimoxifene	PRKCQ
afimoxifene	PRKCZ
AG-490	EGFR
AG-490	JAK2
AG-490	JAK3
agmatine	ADRA2C
agmatine	ASIC3
agmatine	CACNA1B
agmatine	CHRNA1
agmatine	GRIN1
agmatine	KCNJ1
agmatine	NISCH
AGN-194310	RXRA
AGN-194310	RXRB
AGN-194310	RXRG
agomelatine	HTR2A
agomelatine	HTR2B
agomelatine	HTR2C
agomelatine	MTNR1A
agomelatine	MTNR1B
AH6809	PTGDR
AH6809	PTGER1
AH6809	PTGER2
AH6809	PTGER3
AJ76-(+)	DRD2
AJ76-(+)	DRD3
AJ76-(+)	DRD4
alanine	AARS
alanine	AARS2
alanine	ABAT
alanine	AGXT
alanine	AGXT2
alanine	GPRC6A
alanine	GPT
alanine	GPT2
alanine	KYNU
alanine	NFS1
alanine	PHYKPL
alanine	SLC1A4
alanine	SLC36A1
alanine	SLC7A8
albendazole	TUBA1A
albendazole	TUBB
albendazole	TUBB4B
albuterol	ADRB1
albuterol	ADRB2
alclometasone-dipropionate	CYP3A4
alclometasone-dipropionate	NR3C1
alclometasone-dipropionate	SERPINA6
alcuronium	CHRM1
alcuronium	CHRM2
alcuronium	CHRM3
alcuronium	CHRM4
alcuronium	CHRNA7
alectinib	ALK
alectinib	MET
alendronate	ATP6V1A
alendronate	FDPS
alendronate	PTPN4
alendronate	PTPRE
alendronate	PTPRS
alfacalcidol	CYP27B1
alfacalcidol	VDR
alfuzosin	ADRA1A
alfuzosin	ADRA1B
alfuzosin	ADRA1D
alfuzosin	KCNH2
allicin	TRPA1
allicin	TRPV1
allopregnanolone	GABRA1
allopregnanolone	GABRA2
allopregnanolone	GABRA3
allopregnanolone	GABRA4
allopregnanolone	GABRA5
allopregnanolone	GABRA6
allopregnanolone	GABRB2
allopregnanolone	GABRG2
allylestrenol	ESR1
allylestrenol	PGR
allylestrenol	SLC6A9
almorexant	HCRTR1
almorexant	HCRTR2
almotriptan	HTR1B
almotriptan	HTR1D
alpelisib	PIK3CA
alpelisib	PIK3CB
alpelisib	PIK3CD
alpelisib	PIK3CG
alpha-linolenic-acid	ELOVL4
alpha-linolenic-acid	FADS1
alpha-linolenic-acid	FADS2
alpha-linolenic-acid	FFAR1
alpha-linolenic-acid	FFAR4
alpha-linolenic-acid	PTGS2
alpha-linolenic-acid	SLC8A1
alpha-linolenic-acid	TRPV1
alpha-methylserotonin	HTR1D
alpha-methylserotonin	HTR1E
alpha-methylserotonin	HTR1F
alpha-methylserotonin	HTR2A
alpha-methylserotonin	HTR2B
alpha-methylserotonin	HTR2C
alpha-methylserotonin	HTR4
alprenolol	ADRB1
alprenolol	ADRB2
alprenolol	HTR1A
alprostadil	CATSPER1
alprostadil	CATSPER2
alprostadil	CATSPER3
alprostadil	CATSPER4
alprostadil	PTGDR
alprostadil	PTGER1
alprostadil	PTGER2
alprostadil	PTGER4
alprostadil	PTGIR
altinicline	CHRNA4
altinicline	CHRNB2
altiratinib	KDR
altiratinib	MET
altiratinib	TEK
alvimopan	OPRD1
alvimopan	OPRK1
alvimopan	OPRM1
alvocidib	CDK1
alvocidib	CDK2
alvocidib	CDK4
alvocidib	CDK5
alvocidib	CDK6
alvocidib	CDK7
alvocidib	CDK8
alvocidib	CDK9
alvocidib	EGFR
alvocidib	PYGM
AM-1241	CNR1
AM-1241	CNR2
AM-251	CNR1
AM-251	GPR18
AM-251	GPR55
AM-281	CNR1
AM-281	CNR2
AM-281	GPR55
AM-404	CNR1
AM-404	CNR2
AM-404	FAAH
AM-404	TRPV1
AM-630	CNR1
AM-630	CNR2
AM679	ALOX5AP
AM679	CNR1
AM679	CNR2
amantadine	DRD2
amantadine	GRIN2A
amantadine	GRIN2B
amantadine	GRIN2C
amantadine	GRIN2D
amantadine	GRIN3A
ambrisentan	EDNRA
ambrisentan	EDNRB
amcinonide	ANXA1
amcinonide	NR3C1
amfenac	PTGS1
amfenac	PTGS2
amfepramone	SLC6A2
amfepramone	SLC6A3
AMG-548	MAPK11
AMG-548	MAPK12
AMG-548	MAPK13
AMG-548	MAPK14
AMG900	AURKA
AMG900	AURKB
AMG900	AURKC
AMG-925	CDK4
AMG-925	CDK6
AMG-925	FLT3
amiflamine	MAOA
amiflamine	SLC6A2
amifostine	ALPPL2
amifostine	ENPP1
amiloride	AOC1
amiloride	ASIC1
amiloride	ASIC2
amiloride	ASIC3
amiloride	PKD2
amiloride	PKD2L1
amiloride	PLAU
amiloride	SCNN1A
amiloride	SCNN1B
amiloride	SCNN1D
amiloride	SCNN1G
amiloride	SLC9A1
amiloride	TRPC7
amiloride	TRPV2
amineptine	SLC6A2
amineptine	SLC6A4
aminocaproic-acid	LPA
aminocaproic-acid	PLAT
aminocaproic-acid	PLG
aminoglutethimide	CYP11A1
aminoglutethimide	CYP19A1
aminophylline	ADORA1
aminophylline	ADORA2A
aminophylline	ADORA2B
aminophylline	ADORA3
aminophylline	HDAC2
aminophylline	PDE3A
aminophylline	PDE3B
aminophylline	PDE4A
aminophylline	PDE4B
aminophylline	PDE4C
aminophylline	PDE4D
aminopterin	DHFR
aminopterin	SLC46A1
aminopurvalanol-a	CDK1
aminopurvalanol-a	CDK2
aminopurvalanol-a	CDK5
aminopurvalanol-a	CDK6
aminosalicylate	ALOX5
aminosalicylate	CHUK
aminosalicylate	PLA2G2E
aminosalicylate	PTGS1
aminosalicylate	PTGS2
aminothiadiazole	ADORA3
aminothiadiazole	IMPDH1
amiodarone	ADRB1
amiodarone	CACNA1H
amiodarone	CACNA2D2
amiodarone	KCNA7
amiodarone	KCNH2
amisulpride	DRD2
amisulpride	DRD3
amisulpride	HTR2A
amisulpride	HTR7
amitifadine	SLC6A2
amitifadine	SLC6A3
amitifadine	SLC6A4
amitraz	ADRA1A
amitraz	ADRA2A
amitriptyline	ADRA1A
amitriptyline	ADRA1B
amitriptyline	ADRA1D
amitriptyline	ADRA2A
amitriptyline	ADRB1
amitriptyline	ADRB2
amitriptyline	ADRB3
amitriptyline	CHRM1
amitriptyline	CHRM2
amitriptyline	CHRM3
amitriptyline	CHRM4
amitriptyline	CHRM5
amitriptyline	HRH1
amitriptyline	HRH2
amitriptyline	HRH4
amitriptyline	HTR1A
amitriptyline	HTR1B
amitriptyline	HTR1D
amitriptyline	HTR2A
amitriptyline	HTR2C
amitriptyline	HTR6
amitriptyline	HTR7
amitriptyline	KCNA1
amitriptyline	KCND2
amitriptyline	KCND3
amitriptyline	KCNQ2
amitriptyline	KCNQ3
amitriptyline	NTRK1
amitriptyline	NTRK2
amitriptyline	OPRD1
amitriptyline	OPRK1
amitriptyline	OPRM1
amitriptyline	SIGMAR1
amitriptyline	SLC6A2
amitriptyline	SLC6A4
amlexanox	FGF1
amlexanox	IL3
amlexanox	PDE4A
amlexanox	PDE4B
amlexanox	PDE4C
amlexanox	PDE4D
amlexanox	S100A12
amlexanox	S100A13
amlodipine	CA1
amlodipine	CACNA1B
amlodipine	CACNA1C
amlodipine	CACNA1D
amlodipine	CACNA1F
amlodipine	CACNA1S
amlodipine	CACNA2D1
amlodipine	CACNA2D3
amlodipine	CACNB1
amlodipine	CACNB2
amlodipine	SMPD1
ammonium-glycyrrhizinate	HSD11B1
ammonium-glycyrrhizinate	HSD11B2
ammonium-glycyrrhizinate	SLCO1B1
ammonium-glycyrrhizinate	SLCO1B3
amonafide	TOP2A
amonafide	TOP2B
amoxapine	ADRA1A
amoxapine	ADRA1B
amoxapine	ADRA1D
amoxapine	ADRA2A
amoxapine	ADRA2B
amoxapine	ADRA2C
amoxapine	CHRM1
amoxapine	CHRM2
amoxapine	CHRM3
amoxapine	CHRM4
amoxapine	CHRM5
amoxapine	DRD1
amoxapine	DRD2
amoxapine	DRD3
amoxapine	DRD4
amoxapine	DRD5
amoxapine	GABRA1
amoxapine	GABRA2
amoxapine	GABRA3
amoxapine	GABRA4
amoxapine	GABRA5
amoxapine	GABRA6
amoxapine	GABRB1
amoxapine	GABRB2
amoxapine	GABRB3
amoxapine	GABRD
amoxapine	GABRE
amoxapine	GABRG1
amoxapine	GABRG2
amoxapine	GABRG3
amoxapine	GABRP
amoxapine	GABRQ
amoxapine	HRH1
amoxapine	HRH4
amoxapine	HTR1A
amoxapine	HTR1B
amoxapine	HTR2A
amoxapine	HTR2B
amoxapine	HTR2C
amoxapine	HTR3A
amoxapine	HTR6
amoxapine	HTR7
amoxapine	SLC6A2
amoxapine	SLC6A3
amoxapine	SLC6A4
amoxicillin	CYP2C19
amoxicillin	SLC15A1
amoxicillin	SLC15A2
amoxicillin	SLC22A6
ampalex	GRIA1
ampalex	GRIA2
ampalex	GRIA3
ampalex	GRIA4
amperozide	FAAH
amperozide	HTR2A
ampiroxicam	PTGS1
ampiroxicam	PTGS2
amrinone	PDE3A
amrinone	PDE3B
amrinone	PDE4B
amrinone	TNF
amrubicin	TOP2A
amrubicin	TOP2B
amsacrine	KCNH2
amsacrine	TOP2A
amtolmetin-guacil	PTGS1
amtolmetin-guacil	PTGS2
amuvatinib	KIT
amuvatinib	MET
anandamide	CACNA1G
anandamide	CACNA1H
anandamide	CACNA1I
anandamide	CNR1
anandamide	CNR2
anandamide	GLRA1
anandamide	GPR18
anandamide	GPR55
anandamide	KCNA2
anandamide	KCNK3
anandamide	KCNK9
anandamide	TRPM8
anandamide	TRPV1
aniracetam	DRD2
aniracetam	GRIA1
aniracetam	GRIA2
aniracetam	GRIA3
aniracetam	GRIA4
aniracetam	HTR2A
anisomycin	NHP2L1
anisomycin	RPL10L
anisomycin	RPL11
anisomycin	RPL13A
anisomycin	RPL15
anisomycin	RPL19
anisomycin	RPL23
anisomycin	RPL23A
anisomycin	RPL26L1
anisomycin	RPL3
anisomycin	RPL37
anisomycin	RPL8
anisomycin	RSL24D1
anisotropine	CHRM1
anisotropine	CHRM2
anisotropine	CHRM3
anlotinib	KDR
anlotinib	PDGFRB
AP26113	ALK
AP26113	EGFR
apatinib	CSK
apatinib	KDR
apatinib	KIT
apatinib	RET
APcK-110	KIT
APcK-110	STAT3
API-1	AKT1
API-1	AKT2
API-1	AKT3
apigenin	AKR1B1
apigenin	AR
apigenin	CDK6
apigenin	CFTR
apigenin	CYP19A1
apigenin	CYP1B1
apigenin	HSD17B1
apoptosis-activator-II	BCHE
apoptosis-activator-II	CES1
apraclonidine	ADRA1A
apraclonidine	ADRA2A
apraclonidine	ADRA2B
apraclonidine	ADRA2C
apratastat	ADAM17
apratastat	MMP1
apratastat	MMP13
apratastat	MMP9
apremilast	PDE4A
apremilast	PDE4B
apremilast	PDE4C
apremilast	PDE4D
aprindine	CALM1
aprindine	SCN5A
APY0201	IL12A
APY0201	IL12B
APY0201	PIKFYVE
arachidonic-acid	CLCN2
arachidonic-acid	KCNJ4
arachidonic-acid	KCNK10
arachidonic-acid	KCNK18
arachidonic-acid	KCNK2
arachidonic-acid	PRKCZ
arachidonic-acid	PTGS1
arachidonic-acid	TRPC6
arachidonic-acid	TRPM2
AR-C155858	SLC16A1
AR-C155858	SLC16A7
ARC-239	ADRA2A
ARC-239	ADRA2B
ARC-239	ADRA2C
arctigenin	CHUK
arctigenin	MAP2K1
arcyriaflavin-a	CCND1
arcyriaflavin-a	CDK4
ardeparin	SERPINC1
ardeparin	SERPIND1
arecaidine-propargyl-ester	CHRM1
arecaidine-propargyl-ester	CHRM2
arecaidine-propargyl-ester	CHRM3
arecaidine-propargyl-ester	CHRM4
arecoline	CHRM1
arecoline	CHRM2
arecoline	CHRM3
arecoline	CHRM4
arglabin	FNTA
arglabin	NFKB1
aripiprazole	ADRA1A
aripiprazole	ADRA1B
aripiprazole	ADRA2A
aripiprazole	ADRA2B
aripiprazole	ADRA2C
aripiprazole	CHRM1
aripiprazole	CHRM2
aripiprazole	CHRM3
aripiprazole	CHRM4
aripiprazole	CHRM5
aripiprazole	DRD1
aripiprazole	DRD2
aripiprazole	DRD3
aripiprazole	DRD4
aripiprazole	DRD5
aripiprazole	HRH1
aripiprazole	HTR1A
aripiprazole	HTR1B
aripiprazole	HTR1D
aripiprazole	HTR1E
aripiprazole	HTR2A
aripiprazole	HTR2C
aripiprazole	HTR3A
aripiprazole	HTR6
aripiprazole	HTR7
arsenic-trioxide	AKT1
arsenic-trioxide	CCND1
arsenic-trioxide	IKBKB
arsenic-trioxide	JUN
arsenic-trioxide	MAPK1
arsenic-trioxide	MAPK3
arsenic-trioxide	TXNRD1
arundic-acid	PTGS2
arundic-acid	S100B
AS-604850	PIK3CA
AS-604850	PIK3CG
AS-703026	MAP2K1
AS-703026	MAP2K2
AS-77	KCNA3
AS-77	KCNA5
AS-77	KCNN4
ascorbic-acid	ALKBH2
ascorbic-acid	ALKBH3
ascorbic-acid	BBOX1
ascorbic-acid	DBH
ascorbic-acid	EGLN1
ascorbic-acid	EGLN2
ascorbic-acid	EGLN3
ascorbic-acid	KDM5D
ascorbic-acid	LCT
ascorbic-acid	OGFOD1
ascorbic-acid	OGFOD2
ascorbic-acid	P3H1
ascorbic-acid	P3H2
ascorbic-acid	P3H3
ascorbic-acid	P4HA1
ascorbic-acid	P4HTM
ascorbic-acid	PAM
ascorbic-acid	PHYH
ascorbic-acid	PLOD1
ascorbic-acid	PLOD2
ascorbic-acid	PLOD3
ascorbic-acid	SLC23A1
ascorbic-acid	SLC23A2
ascorbic-acid	TMLHE
asenapine	ADRA1A
asenapine	ADRA2A
asenapine	ADRA2B
asenapine	ADRA2C
asenapine	ADRB1
asenapine	ADRB2
asenapine	DRD1
asenapine	DRD2
asenapine	DRD3
asenapine	DRD4
asenapine	HRH1
asenapine	HRH2
asenapine	HTR1A
asenapine	HTR1B
asenapine	HTR1D
asenapine	HTR1E
asenapine	HTR2A
asenapine	HTR2B
asenapine	HTR2C
asenapine	HTR5A
asenapine	HTR6
asenapine	HTR7
aspartame	TAS1R2
aspartame	TRPV1
aspirin	AKR1C1
aspirin	ASIC3
aspirin	EDNRA
aspirin	HSPA5
aspirin	IKBKB
aspirin	NFKB1
aspirin	NFKB2
aspirin	NFKBIA
aspirin	PRKAA1
aspirin	PRKAA2
aspirin	PRKAB1
aspirin	PRKAB2
aspirin	PRKAG1
aspirin	PRKAG2
aspirin	PRKAG3
aspirin	PTGS1
aspirin	PTGS2
aspirin	RPS6KA3
aspirin	TP53
AST-1306	EGFR
AST-1306	ERBB2
astemizole	HRH1
astemizole	KCNH1
astemizole	KCNH2
asymmetrical-dimethylarginine	NOS2
asymmetrical-dimethylarginine	NOS3
AT13148	AKT1
AT13148	AKT2
AT13148	AKT3
AT13148	ROCK1
AT13148	ROCK2
AT13148	SGK3
AT-7519	CDK1
AT-7519	CDK2
AT-7519	CDK4
AT-7519	CDK5
AT-7519	CDK6
AT-7519	CDK9
AT7867	AKT2
AT7867	GSK3B
AT7867	PKIA
AT7867	PRKACA
AT-9283	AURKA
AT-9283	AURKB
AT-9283	JAK2
AT-9283	JAK3
AT-9283	RPS6KA6
AT-9283	STK17A
atenolol-(+/-)	ADRB1
atenolol-(+/-)	ADRB2
atiprimod	JAK2
atiprimod	STAT3
atizoram	PDE4A
atizoram	PDE4B
atizoram	PDE4C
atizoram	PDE4D
ATN-161	ITGA5
ATN-161	ITGAV
ATN-161	ITGB1
ATN-161	ITGB3
atomoxetine	GRIN1
atomoxetine	GRIN2A
atomoxetine	GRIN2B
atomoxetine	GRIN2C
atomoxetine	GRIN2D
atomoxetine	GRIN3A
atomoxetine	GRIN3B
atomoxetine	SLC6A2
atomoxetine	SLC6A3
atomoxetine	SLC6A4
atorvastatin	AHR
atorvastatin	DPP4
atorvastatin	HMGCR
atosiban	AVPR1A
atosiban	AVPR1B
atosiban	AVPR2
atosiban	OXTR
ATPA	GRIA2
ATPA	GRIK1
atropine	CHRM1
atropine	CHRM2
atropine	CHRM3
atropine	CHRM4
atropine	CHRM5
auranofin	IKBKB
auranofin	PRDX5
auranofin	TRPA1
AV-412	EGFR
AV-412	ERBB2
AVL-292	BTK
AVL-292	YES1
AVN-944	IMPDH1
AVN-944	IMPDH2
axitinib	CSF1
axitinib	FLT1
axitinib	FLT4
axitinib	KDR
axitinib	PLK4
AZ20	ATR
AZ20	MTOR
AZ-628	BRAF
AZ-628	RAF1
azacitidine	DNMT1
azacitidine	DNMT3A
azaperone	DRD2
azaperone	DRD3
azasetron	HTR3A
azasetron	HTR3B
azathioprine	HPRT1
azathioprine	IMPDH1
azathioprine	PPAT
AZD1080	GSK3A
AZD1080	GSK3B
AZD1208	PIM1
AZD1208	PIM2
AZD1208	PIM3
AZD1446	CHRNA4
AZD1446	CHRNB2
AZD1480	JAK1
AZD1480	JAK2
AZD1480	JAK3
AZD3463	ALK
AZD3463	IGF1R
AZD4282	AGXT
AZD4282	AGXT2
AZD4282	ALAS1
AZD4282	ALAS2
AZD4282	BAAT
AZD4282	GARS
AZD4282	GATM
AZD4282	GCAT
AZD4282	GCSH
AZD4282	GLDC
AZD4282	GLRA1
AZD4282	GLRA2
AZD4282	GLRA3
AZD4282	GLRB
AZD4282	GLYAT
AZD4282	GLYATL1
AZD4282	GLYATL2
AZD4282	GNMT
AZD4282	GPR18
AZD4282	GPRC6A
AZD4282	GRIN1
AZD4282	GRIN2A
AZD4282	GRIN2B
AZD4282	GRIN2C
AZD4282	GRIN2D
AZD4282	GRIN3B
AZD4282	GSS
AZD4282	PIPOX
AZD4282	SHMT1
AZD4282	SHMT2
AZD4282	SLC32A1
AZD4282	SLC36A1
AZD4282	SLC6A5
AZD4282	SLC6A9
AZD4547	FGFR1
AZD4547	FGFR2
AZD4547	FGFR3
AZD4547	FGFR4
AZD4547	IGF1R
AZD4547	KDR
AZD5363	AKT1
AZD5363	AKT2
AZD5363	AKT3
AZD5582	BIRC2
AZD5582	BIRC3
AZD5582	XIAP
AZD6482	PIK3CA
AZD6482	PIK3CB
AZD6482	PIK3CD
AZD6482	PIK3CG
AZD7762	CHEK1
AZD7762	CHEK2
AZD8186	PIK3CB
AZD8186	PIK3CD
AZD8835	PIK3CA
AZD8835	PIK3CD
AZD8931	EGFR
AZD8931	ERBB2
AZD8931	ERBB3
azelaic-acid	AKR1D1
azelaic-acid	SRD5A2
azelaic-acid	TYR
azilsartan	AGTR1
azilsartan	AGTR2
azilsartan-medoxomil	AGTR1
azilsartan-medoxomil	AGTR2
azimilide	KCNA5
azimilide	KCNE1
azimilide	KCNH2
azimilide	KCNQ1
azosemide	SLC12A1
azosemide	SLC12A2
bacitracin	A2M
bacitracin	IDE
baclofen	GABBR1
baclofen	GABBR2
baclofen	KCTD12
baclofen	KCTD16
baclofen	KCTD8
baclofen-(R)	GABBR1
baclofen-(R)	GABBR2
bafetinib	ABL1
bafetinib	BCR
bafetinib	LYN
baicalein	ALOX5
baicalein	GLO1
baicalein	PREP
baicalein	SELL
baicalein	SELP
baicalein	TNF
baicalein	XDH
balsalazide	ALOX5
balsalazide	PPARG
balsalazide	PTGS1
balsalazide	PTGS2
bambuterol	ADRB2
bambuterol	BCHE
barasertib	AURKA
barasertib	AURKB
barbital	CHRNA4
barbital	CHRNA7
barbital	GABRA1
barbital	GABRA2
barbital	GABRA3
barbital	GABRA4
barbital	GABRA5
barbital	GABRA6
barbital	GRIA2
barbital	GRIK2
bardoxolone	NOS2
bardoxolone	PPARG
bardoxolone-methyl	PPARG
bardoxolone-methyl	STAT3
baricitinib	JAK1
baricitinib	JAK2
batimastat	ADAM28
batimastat	ADAMTS5
batimastat	MMP12
batimastat	MMP16
batimastat	MMP2
batimastat	MMP8
BAY-41-2272	GUCY1A3
BAY-41-2272	GUCY1B3
BAY-60-6583	ADORA1
BAY-60-6583	ADORA2A
BAY-60-6583	ADORA2B
BAY-60-6583	ADORA3
bazedoxifene	ESR1
bazedoxifene	ESR2
beclomethasone	NR3C1
beclomethasone	SERPINA6
beclomethasone-dipropionate	GPR97
beclomethasone-dipropionate	NR3C1
belinostat	HDAC1
belinostat	HDAC10
belinostat	HDAC11
belinostat	HDAC2
belinostat	HDAC3
belinostat	HDAC4
belinostat	HDAC5
belinostat	HDAC6
belinostat	HDAC7
belinostat	HDAC8
belinostat	HDAC9
bemesetron	HTR3A
bemesetron	HTR3B
bendazac	PTGS1
bendazac	PTGS2
bendroflumethiazide	CA1
bendroflumethiazide	CA2
bendroflumethiazide	CA4
bendroflumethiazide	KCNMA1
bendroflumethiazide	SLC12A1
bendroflumethiazide	SLC12A3
benfluralin	CYP1A1
benfluralin	CYP1A2
benfluralin	CYP2B6
benfluralin	CYP3A4
benfluralin	ESR1
benfluralin	MMP1
benfluralin	SULT2A1
benfluralin	UGT1A1
benidipine	CACNA1C
benidipine	CACNA1G
benzamil	ASIC1
benzamil	PKD2L1
benzamil	SCNN1A
benzamil	SCNN1B
benzamil	SCNN1D
benzamil	SCNN1G
benzamil	SLC8A1
benzoic-acid	DAO
benzoic-acid	HRSP12
benzoic-acid	PRDX5
benzoic-acid	RAB9A
benzotript	CCKAR
benzotript	CCKBR
benzthiazide	CA1
benzthiazide	CA12
benzthiazide	CA2
benzthiazide	CA4
benzthiazide	CA9
benzthiazide	SLC12A3
benztropine-mesylate	CHRM1
benztropine-mesylate	HRH1
benztropine-mesylate	SLC6A3
bepridil	ATP1A1
bepridil	CACNA1A
bepridil	CACNA1H
bepridil	CACNA2D2
bepridil	CALM1
bepridil	KCNQ1
bepridil	KCNQ4
bepridil	PDE1A
bepridil	PDE1B
bepridil	TNNC1
bergenin	IL1B
bergenin	TNF
beta-CCB	GABRA1
beta-CCB	GABRG2
beta-elemene	MMP2
beta-elemene	MMP9
beta-funaltrexamine	OPRD1
beta-funaltrexamine	OPRK1
beta-funaltrexamine	OPRM1
betahistine	HRH1
betahistine	HRH3
betaxolol	ADRB1
betaxolol	ADRB2
bethanechol	CHRM1
bethanechol	CHRM2
bethanechol	CHRM3
bethanechol	CHRM4
bevantolol	ADRA1A
bevantolol	ADRB1
bevantolol	ADRB2
bexarotene	RXRA
bexarotene	RXRB
bexarotene	RXRG
bezafibrate	PPARA
bezafibrate	PPARD
bezafibrate	PPARG
BGT226	MTOR
BGT226	PIK3CA
BGT226	PIK3CB
BGT226	PIK3CG
BI-2536	BRD4
BI-2536	PLK1
BI-2536	PLK2
BI-2536	PLK3
BI-847325	AURKA
BI-847325	AURKB
BI-847325	AURKC
BI-847325	MAP2K1
BI-847325	MAP2K2
BIBN4096	CALCA
BIBN4096	CALCRL
BIBN4096	RAMP1
BIBX-1382	EGFR
BIBX-1382	ERBB2
bicifadine	DRD2
bicifadine	SLC6A2
bicifadine	SLC6A4
bicuculline-(+)	GABRA1
bicuculline-(+)	GABRA2
bicuculline-(+)	GABRA3
bicuculline-(+)	GABRA4
bicuculline-(+)	GABRA5
bicuculline-(+)	GABRA6
bicuculline-(+)	KCNN1
bicyclol	HSPA1A
bicyclol	HSPB1
BI-D1870	RPS6KA1
BI-D1870	RPS6KA2
BI-D1870	RPS6KA3
BI-D1870	RPS6KA6
bifemelane	MAOA
bifemelane	MAOB
bilobalide	GLRA1
bilobalide	GLRA2
bilobalide	GLRB
bilobalide	HTR3A
bilobalide	HTR3B
bimatoprost	AKR1C3
bimatoprost	PTGER1
bimatoprost	PTGER3
bimatoprost	PTGFR
bindarit	CCL2
bindarit	CCL7
bindarit	CCL8
BIO-1211	ITGA4
BIO-1211	ITGB1
BIO-5192	ITGA4
BIO-5192	ITGB1
biotin	ACACA
biotin	ACACB
biotin	HLCS
biotin	MCCC1
biotin	MCCC2
biotin	PC
biotin	PCCA
biotin	PCCB
biotin	SLC5A6
biperiden	CHRM1
biperiden	CHRM2
biperiden	CHRM3
biperiden	CHRM4
biperiden	CHRM5
biperiden	CHRNA2
birinapant	BIRC2
birinapant	XIAP
bisindolylmaleimide-ix	AKT1
bisindolylmaleimide-ix	GSK3B
bisindolylmaleimide-ix	LCK
bisindolylmaleimide-ix	MAPK1
bisindolylmaleimide-ix	MAPK11
bisindolylmaleimide-ix	MAPK12
bisindolylmaleimide-ix	MAPK14
bisindolylmaleimide-ix	MAPK8
bisindolylmaleimide-ix	PRKCA
bisindolylmaleimide-ix	ROCK1
bisindolylmaleimide-ix	RPS6KB1
bisindolylmaleimide-ix	SIRT1
bisoprolol	ADRB1
bisoprolol	ADRB2
bisphenol-a	AR
bisphenol-a	ESR1
bisphenol-a	ESR2
bisphenol-a	ESRRG
bisphenol-a	PPARG
bithionol	ESR1
bithionol	ESR2
bithionol	MCL1
bitopertin	SLC6A5
bitopertin	SLC6A9
BIX-01294	EHMT1
BIX-01294	EHMT2
BIX-02189	MAP2K5
BIX-02189	MAPK7
bleomycin	LIG1
bleomycin	LIG3
blonanserin	DRD2
blonanserin	HTR2A
BMS-265246	CDK1
BMS-265246	CDK2
BMS-345541	CHUK
BMS-345541	IKBKB
BMS-387032	CDK2
BMS-387032	CDK7
BMS-387032	CDK9
BMS-536924	AKT1
BMS-536924	CCNE1
BMS-536924	CDK2
BMS-536924	CYP3A4
BMS-536924	ERBB2
BMS-536924	IGF1R
BMS-536924	KDR
BMS-536924	LCK
BMS-536924	MAPK1
BMS-536924	MET
BMS-536924	PDGFRA
BMS-536924	PDGFRB
BMS-566419	IMPDH1
BMS-566419	IMPDH2
BMS-587101	ITGAL
BMS-587101	ITGB2
BMS-599626	EGFR
BMS-599626	ERBB2
BMS-599626	ERBB4
BMS-690514	EGFR
BMS-690514	ERBB2
BMS-690514	FLT3
BMS-690514	KDR
BMS-754807	AKT1
BMS-754807	IGF1R
BMS-777607	AXL
BMS-777607	MERTK
BMS-777607	MET
BMS-777607	MST1R
BMS-777607	TYRO3
BMS-817378	KDR
BMS-817378	MET
BMS-863233	CDC7
BMS-863233	PIM1
BMY-7378	ADRA1A
BMY-7378	ADRA1B
BMY-7378	ADRA1D
BMY-7378	HTR1A
BNTX	OPRD1
BNTX	OPRK1
BNTX	OPRM1
boceprevir	CMA1
boceprevir	CTSA
boceprevir	CTSF
boceprevir	CTSK
boceprevir	CTSL
boceprevir	CTSS
bopindolol	ADRB1
bopindolol	ADRB2
bopindolol	ADRB3
bopindolol	HTR1A
bopindolol	HTR1B
bortezomib	PSMA1
bortezomib	PSMA2
bortezomib	PSMA3
bortezomib	PSMA4
bortezomib	PSMA5
bortezomib	PSMA6
bortezomib	PSMA7
bortezomib	PSMA8
bortezomib	PSMB1
bortezomib	PSMB10
bortezomib	PSMB11
bortezomib	PSMB2
bortezomib	PSMB3
bortezomib	PSMB4
bortezomib	PSMB5
bortezomib	PSMB6
bortezomib	PSMB7
bortezomib	PSMB8
bortezomib	PSMB9
bortezomib	PSMD1
bortezomib	PSMD2
bortezomib	RELA
bosentan	EDNRA
bosentan	EDNRB
bosutinib	ABL1
bosutinib	BCR
bosutinib	CAMK1D
bosutinib	CAMK2G
bosutinib	CDK2
bosutinib	FRK
bosutinib	FYN
bosutinib	HCK
bosutinib	LYN
bosutinib	MAP2K1
bosutinib	MAP2K2
bosutinib	MAP3K2
bosutinib	MAP4K5
bosutinib	SRC
bosutinib	STK10
bosutinib	STK24
bosutinib	STK4
bosutinib	TNK2
bosutinib	TXK
BP-897	ADRA1A
BP-897	ADRA1D
BP-897	ADRA2A
BP-897	DRD1
BP-897	DRD2
BP-897	DRD3
BP-897	DRD4
BP-897	HTR1A
BP-897	HTR2B
BQU57	RALA
BQU57	RALB
BRD-7389	RPS6KA1
BRD-7389	RPS6KA2
BRD-7389	RPS6KA3
brefeldin-a	ARF1
brefeldin-a	CYTH2
bremelanotide	MC1R
bremelanotide	MC2R
bremelanotide	MC3R
bremelanotide	MC4R
bremelanotide	MC5R
bretazenil	GABRA1
bretazenil	GABRA2
bretazenil	GABRA3
bretazenil	GABRA4
bretazenil	GABRA5
bretazenil	GABRA6
brigatinib	ALK
brigatinib	EGFR
brimonidine	ADRA2A
brimonidine	ADRA2B
brimonidine	ADRA2C
brinzolamide	CA1
brinzolamide	CA12
brinzolamide	CA14
brinzolamide	CA2
brinzolamide	CA4
brinzolamide	CA5A
brinzolamide	CA7
brivanib	CYP3A4
brivanib	FGFR1
brivanib	FLT1
brivanib	KCNH2
brivanib	KDR
BRL-15572	HTR1A
BRL-15572	HTR1B
BRL-15572	HTR1D
BRL-15572	HTR1E
BRL-15572	HTR1F
BRL-15572	HTR2A
BRL-15572	HTR2B
BRL-15572	HTR2C
BRL-15572	HTR6
BRL-37344	ADRB1
BRL-37344	ADRB2
BRL-37344	ADRB3
BRL-44408	ADRA2A
BRL-44408	ADRA2B
BRL-44408	ADRA2C
BRL-50481	PDE7A
BRL-50481	PDE7B
BRL-54443	HTR1E
BRL-54443	HTR1F
bromfenac	PTGS1
bromfenac	PTGS2
bromocriptine	ADRA1A
bromocriptine	ADRA1B
bromocriptine	ADRA1D
bromocriptine	ADRA2A
bromocriptine	ADRA2B
bromocriptine	ADRA2C
bromocriptine	DRD1
bromocriptine	DRD2
bromocriptine	DRD3
bromocriptine	DRD4
bromocriptine	DRD5
bromocriptine	HTR1A
bromocriptine	HTR1B
bromocriptine	HTR1D
bromocriptine	HTR2A
bromocriptine	HTR2B
bromocriptine	HTR2C
bromocriptine	HTR6
bromocriptine	HTR7
brompheniramine	CHRM1
brompheniramine	CHRM2
brompheniramine	CHRM3
brompheniramine	CHRM4
brompheniramine	CHRM5
brompheniramine	HRH1
brucine	CHRM1
brucine	CHRM2
brucine	CHRM3
brucine	CHRM4
brucine	CHRM5
BTS-54505	SLC6A2
BTS-54505	SLC6A3
BTS-54505	SLC6A4
BTT-3033	ITGA2
BTT-3033	ITGB1
BU-224	MAOA
BU-224	MAOB
buclizine	CHRM1
buclizine	HRH1
bufexamac	HDAC10
bufexamac	HDAC6
bumetanide	CFTR
bumetanide	GPR35
bumetanide	SLC12A1
bumetanide	SLC12A2
bumetanide	SLC12A4
bumetanide	SLC12A5
buparlisib	PIK3CA
buparlisib	PIK3CG
bupivacaine	KCNA5
bupivacaine	PTGER1
bupivacaine	SCN10A
bupivacaine	SCN4A
bupranolol	ADRB1
bupranolol	ADRB2
bupranolol	ADRB3
bupropion	CHRNA3
bupropion	SLC6A2
bupropion	SLC6A3
buspirone	DRD2
buspirone	HTR1A
butaclamol	DRD1
butaclamol	DRD2
butaclamol	DRD3
butaclamol	DRD4
butaclamol	DRD5
butaclamol	HTR1A
butaclamol	HTR2A
butalbital	CHRNA4
butalbital	CHRNA7
butalbital	GABRA1
butalbital	GABRA2
butalbital	GABRA3
butalbital	GABRA4
butalbital	GABRA5
butalbital	GABRA6
butalbital	GABRB1
butalbital	GABRB2
butalbital	GABRB3
butalbital	GABRD
butalbital	GABRE
butalbital	GABRG1
butalbital	GABRG2
butalbital	GABRG3
butalbital	GABRP
butalbital	GABRQ
butalbital	GRIA2
butalbital	GRIK2
butorphanol-(+)-tartrate	OPRD1
butorphanol-(+)-tartrate	OPRK1
butorphanol-(+)-tartrate	OPRM1
BVT-948	PTPN1
BVT-948	PTPN11
BVT-948	PTPN2
BW-180C	OPRD1
BW-180C	OPRM1
BW-723C86	HTR2A
BW-723C86	HTR2B
BW-723C86	HTR2C
BX-795	CDK2
BX-795	CHEK1
BX-795	GSK3B
BX-795	KDR
BX-795	PDK1
BX-795	PDPK1
BX-912	CDK2
BX-912	CHEK1
BX-912	GSK3B
BX-912	KDR
BX-912	PDK1
BX-912	PDPK1
C11-Acetate	ABAT
C11-Acetate	ACE
C11-Acetate	AKR1C3
C11-Acetate	CA2
C11-Acetate	CELA1
C11-Acetate	ESR2
C11-Acetate	FFAR2
C11-Acetate	FFAR3
C11-Acetate	HPRT1
C11-Acetate	LTA4H
C11-Acetate	MMP12
C11-Acetate	NOS1
C11-Acetate	NOS3
C11-Acetate	PLA2G1B
C11-Acetate	PTPN1
C11-Acetate	SOD1
C11-Acetate	TXN
cabazitaxel	TUBA4A
cabazitaxel	TUBB
cabazitaxel	TUBB1
cabergoline	ADRA1A
cabergoline	ADRA1B
cabergoline	ADRA1D
cabergoline	ADRA2A
cabergoline	ADRA2B
cabergoline	ADRA2C
cabergoline	ADRB1
cabergoline	ADRB2
cabergoline	DRD1
cabergoline	DRD2
cabergoline	DRD3
cabergoline	DRD4
cabergoline	DRD5
cabergoline	HTR1A
cabergoline	HTR1B
cabergoline	HTR1D
cabergoline	HTR2A
cabergoline	HTR2B
cabergoline	HTR2C
cabergoline	HTR7
cabozantinib	KDR
cabozantinib	MET
caffeic-acid	ALOX5
caffeic-acid	MIF
caffeine	ADORA1
caffeine	ADORA2A
caffeine	ADORA2B
caffeine	ADORA3
caffeine	ATM
caffeine	ITPR1
caffeine	ITPR2
caffeine	ITPR3
caffeine	PDE10A
caffeine	PDE11A
caffeine	PDE1A
caffeine	PDE1B
caffeine	PDE1C
caffeine	PDE2A
caffeine	PDE3A
caffeine	PDE3B
caffeine	PDE4A
caffeine	PDE4B
caffeine	PDE4C
caffeine	PDE4D
caffeine	PDE5A
caffeine	PDE6A
caffeine	PDE6B
caffeine	PDE6C
caffeine	PDE7A
caffeine	PDE7B
caffeine	PDE8A
caffeine	PDE8B
caffeine	PDE9A
caffeine	PIK3CA
caffeine	PIK3CB
caffeine	PIK3CD
caffeine	PRKDC
caffeine	RYR1
caffeine	RYR2
caffeine	RYR3
CaMKII-IN-1	AKT1
CaMKII-IN-1	CAMK2A
CaMKII-IN-1	CAMK4
CaMKII-IN-1	MYLK
canagliflozin	SLC5A1
canagliflozin	SLC5A2
candesartan-cilextil	AGTR1
candesartan-cilextil	AGTR2
canertinib	AKT1
canertinib	EGFR
canertinib	ERBB2
canertinib	ERBB4
capsaicin	CFTR
capsaicin	TRPV1
capsazepine	TRPV1
capsazepine	TRPV4
captopril	ACE
captopril	LTA4H
captopril	MMP2
captopril	MMP9
caramiphen	CHRM1
caramiphen	CHRM2
carazolol	ADRB1
carazolol	ADRB2
carazolol	ADRB3
carbachol	CHRM1
carbachol	CHRM2
carbachol	CHRM3
carbachol	CHRM4
carbachol	CHRM5
carbachol	CHRNA2
carbamazepine	SCN10A
carbamazepine	SCN11A
carbamazepine	SCN1A
carbamazepine	SCN2A
carbamazepine	SCN3A
carbamazepine	SCN4A
carbamazepine	SCN5A
carbamazepine	SCN7A
carbamazepine	SCN8A
carbamazepine	SCN9A
carbendazim	TP53
carbendazim	TUBB
carbenoxolone	GJA1
carbenoxolone	GJA10
carbenoxolone	GJA3
carbenoxolone	GJA4
carbenoxolone	GJA5
carbenoxolone	GJA8
carbenoxolone	GJA9
carbenoxolone	GJB1
carbenoxolone	GJB2
carbenoxolone	GJB3
carbenoxolone	GJB4
carbenoxolone	GJB5
carbenoxolone	GJB6
carbenoxolone	GJB7
carbenoxolone	GJC1
carbenoxolone	GJC2
carbenoxolone	GJC3
carbenoxolone	GJD2
carbenoxolone	GJD3
carbenoxolone	GJD4
carbenoxolone	GJE1
carbenoxolone	HSD11B1
carbenoxolone	PANX1
carbenoxolone	PANX2
carbenoxolone	PANX3
carfilzomib	PSMA1
carfilzomib	PSMA2
carfilzomib	PSMA3
carfilzomib	PSMA4
carfilzomib	PSMA5
carfilzomib	PSMA6
carfilzomib	PSMA7
carfilzomib	PSMA8
carfilzomib	PSMB1
carfilzomib	PSMB10
carfilzomib	PSMB11
carfilzomib	PSMB2
carfilzomib	PSMB3
carfilzomib	PSMB4
carfilzomib	PSMB5
carfilzomib	PSMB6
carfilzomib	PSMB7
carfilzomib	PSMB8
carfilzomib	PSMB9
cariprazine	DRD2
cariprazine	DRD3
caroxazone	MAOA
caroxazone	MAOB
carprofen	PTGS1
carprofen	PTGS2
carteolol	ADRB1
carteolol	ADRB2
carvedilol	ADRA1A
carvedilol	ADRA1B
carvedilol	ADRA1D
carvedilol	ADRA2A
carvedilol	ADRA2B
carvedilol	ADRA2C
carvedilol	ADRB1
carvedilol	ADRB2
carvedilol	ADRB3
carvedilol	GJA1
carvedilol	HIF1A
carvedilol	KCNH2
carvedilol	NDUFC2
carvedilol	NPPB
carvedilol	SELE
carvedilol	VCAM1
carvedilol	VEGFA
carzenide	CA1
carzenide	CA12
carzenide	CA14
carzenide	CA2
carzenide	CA6
carzenide	CA9
castanospermine	GAA
[truncated: 11,098 more rows]
