# Supplementary material for: Gene-interaction perturbation network analysis identifies distinct subtypes and actionable targets for aggressive thyroid cancer: an integrative multi-omics and machine learning approach for precise medicine
Source: Research Square preprint supplement (doi:10.21203/rs.3.rs-7834338/v1), 2025-10-30
Supplement: Supplementary file 2 [file ad1cdfe4f4a4120310eee9e2.docx]

**Gene-interaction perturbation network analysis identifies distinct subtypes and actionable targets for aggressive thyroid cancer: an integrative multi-omics and machine learning approach for precise medicine**

Jing Sun1,2**#**, Jiaxuan Huai1,2**#**, Jianpeng Zhang3**#**, Qi Wang4,5**#**, Zhaokai Zhou6, Shaohui Xu7, Tianyu Zhao8, Xin Wang9, Zhe Cheng1,2, Xuanbin Wang10*****, Run Shi11*****, Xiqiao Zhou1,2*****

1. Department of Endocrinology, Jiangsu Province Hospital of Chinese Medicine, Affiliated Hospital of Nanjing University of Chinese Medicine, Nanjing, China, 210029.
2. The First School of Clinical Medicine, Nanjing University of Chinese Medicine, Nanjing, China, 210023.
3. Department of Urology, The First Affiliated Hospital of Guangzhou Medical University, Guangzhou, China, 510120.
4. Department of Pathology, Renmin Hospital, Hubei University of Medicine, Shiyan, Hubei, China, 442000.
5. Research Center for High-Altitude Medicine, Key Laboratory of High-Altitude Medicine, Ministry of Education, Laboratory for High Altitude Medicine of Qinghai Province, Key Laboratory of Application and Foundation for High Altitude Medicine Research in Qinghai Province (Qinghai-Utah Joint Research Key Lab for High-Altitude Medicine), Qinghai University, Xining, China, 810016.
6. Department of Urology, The Second Xiangya Hospital of Central South University, Changsha, Hunan, China, 410011.
7. Institute of Functional Nano & Soft Materials (FUNSOM), Soochow University, Suzhou, China, 215123.
8. Institute and Clinic for Occupational, Social and Environmental Medicine, LMU University Hospital Munich, Munich, Germany, 81377.
9. Department of Oncology, Jiangsu Cancer Hospital, The Affiliated Cancer Hospital of Nanjing Medical University, Jiangsu Institute of Cancer Research, Nanjing, China, 210009.
10. Laboratory of Chinese Herbal Pharmacology, Department of Pharmacology, Hubei Key Laboratory of Wudang Local Chinese Medicine Research, Renmin Hospital, Hubei University of Medicine, Shiyan, Hubei, China, 442000.
11. Department of Oncology, The First Affiliated Hospital of Nanjing Medical University, Nanjing, China, 210029.

**#** These authors contributed equally to this work.

***** Corresponding authors.

Correspondence should be sent to:

Dr. Xiqiao Zhou. Department of Endocrinology, Jiangsu Province Hospital of Chinese Medicine, Affiliated Hospital of Nanjing University of Chinese Medicine, Nanjing, China, 210029.

E-mail: [zhouxiqiao@njucm.edu.cn](mailto:zhouxiqiao@njucm.edu.cn)

Correspondence can also be sent to:

Dr. Run Shi. E-mail: [shirun@njmu.edu.cn](mailto:shirun@njmu.edu.cn);

Prof. Xuanbin Wang. E-mail: wangxb@hbmu.edu.cn


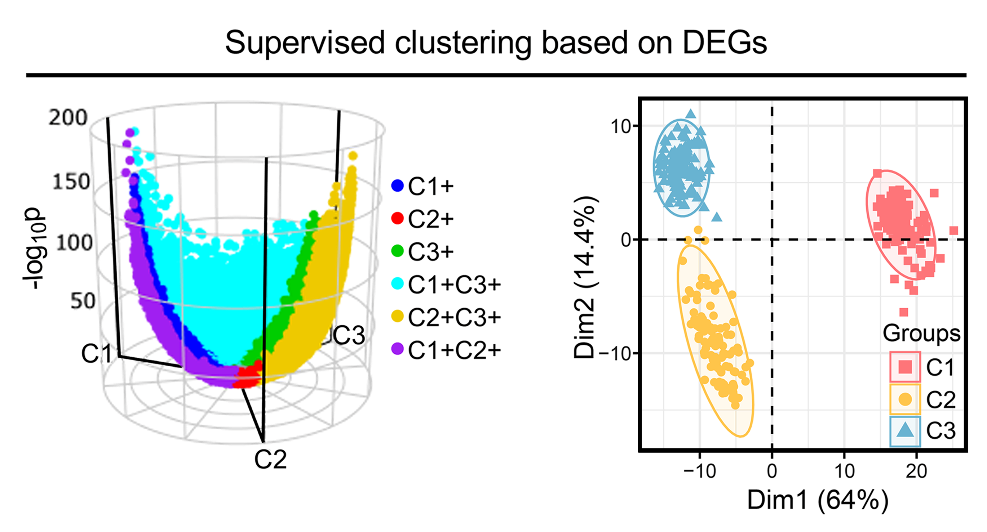


**Supplementary Figure S1:** Marker genes for each subtype were identified and shown in a 3D volcano plot, and principal component analysis (PCA) shows clear dissimilarity among the three subtypes based on these marker genes.


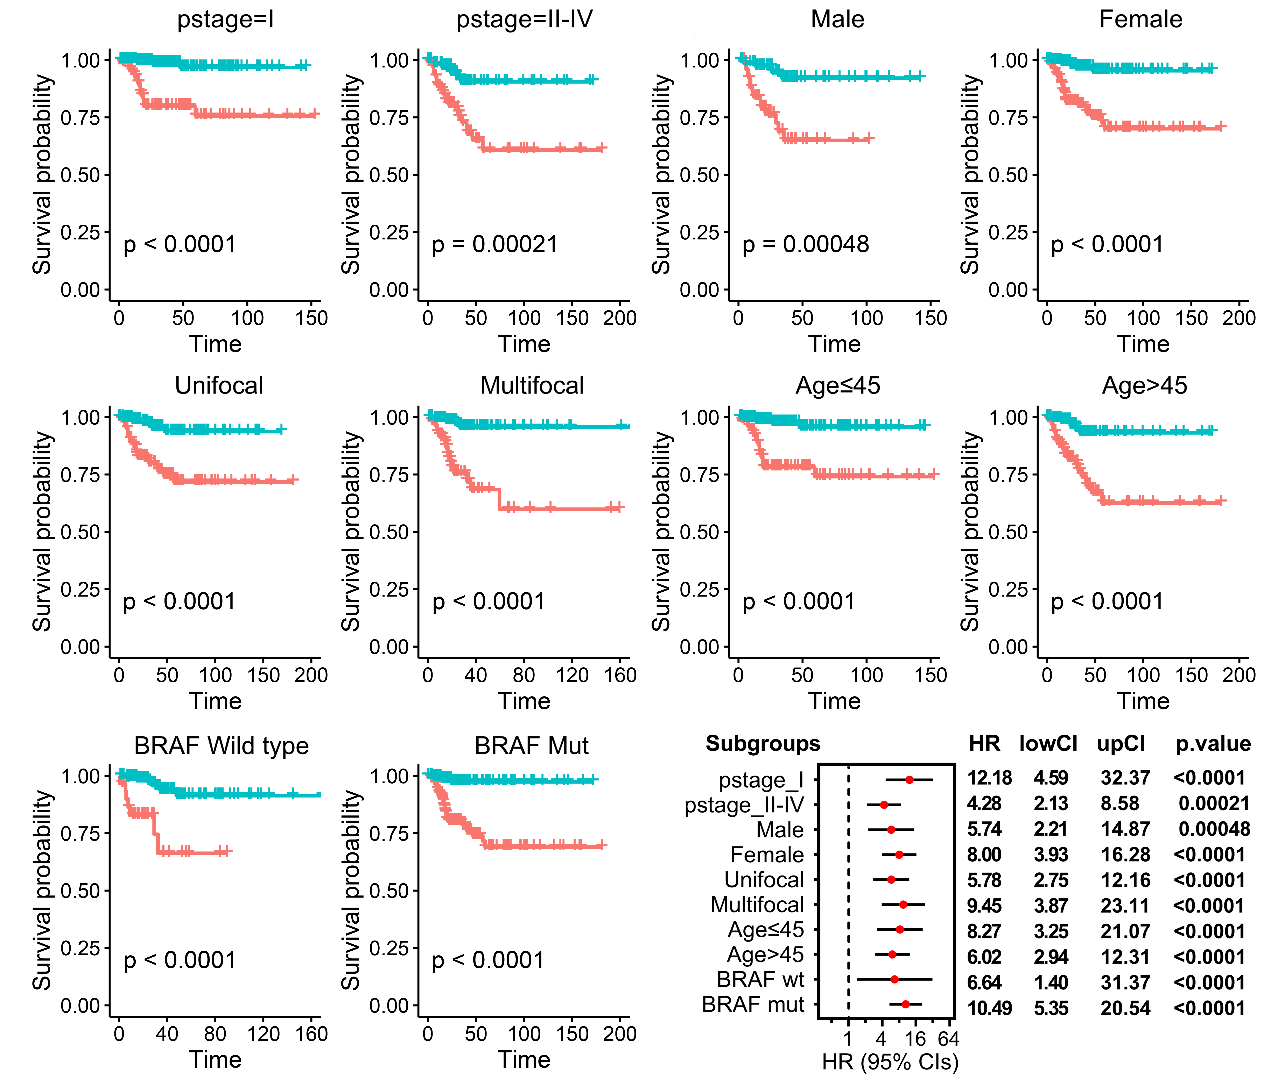


**Supplementary Figure S2:** RSFrs retained its prognostic value in each subgroup in the TCGA-PTC cohort (stratified by pathological stage, gender, focal type, age, and BRAF status). The details of the HR and 95% CIs were shown in the last panel.


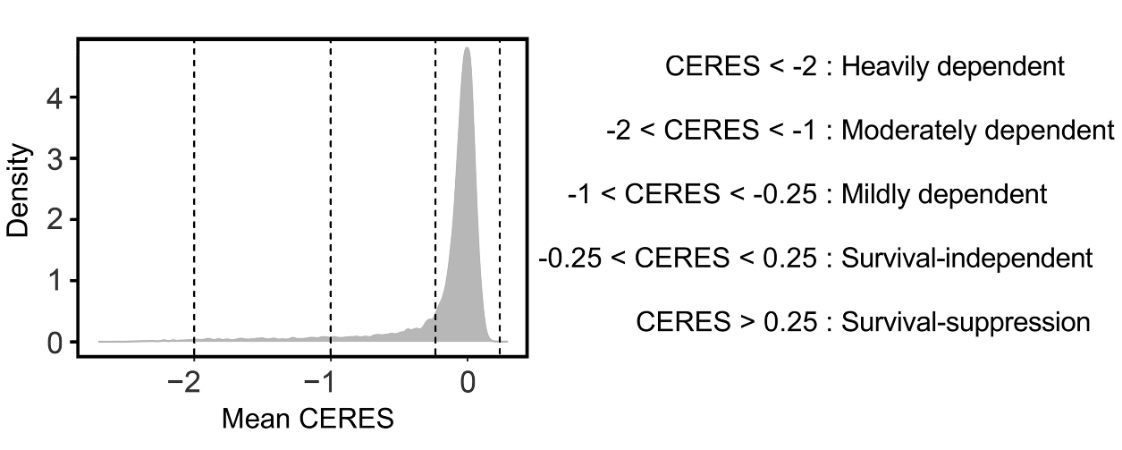


**Supplementary Figure S3:** A density plot of the mean CERES (CRISPR-knockout sensitivity score) values across all genes. CERES < -2: Heavily dependent; -2 < CERES < -1: Moderately dependent; -1 < CERES < -0.25: Mildly dependent; -0.25 < CERES < 0.25: Survival-independent; CERES > 0.25: Survival-suppression.


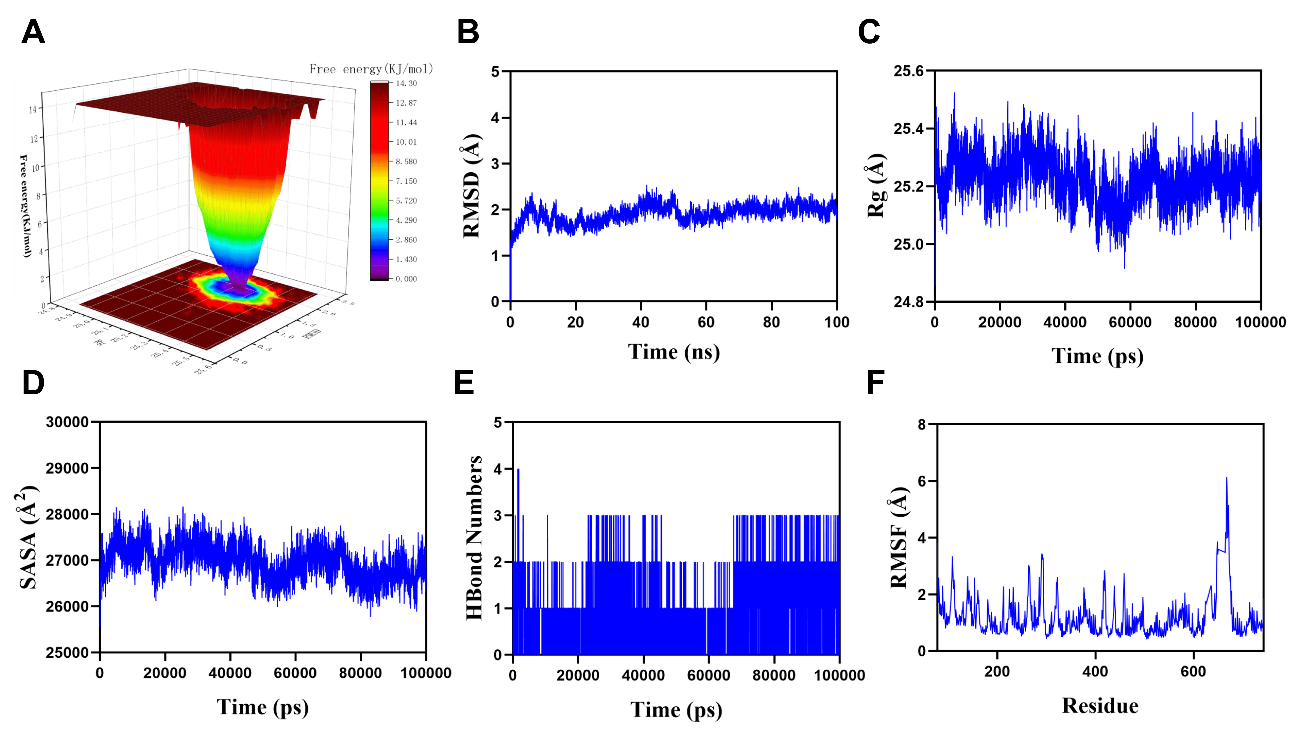


**Supplementary Figure S4:** (A) The free energy landscape in the molecular dynamics simulation analysis. Detailed parameters including (B) Root Mean Square Deviation (RMSD), (C) Radius of Gyration (Rg), (D) Solvent Accessible Surface Area (SASA), (E) hydrogen bond number, and (F) Root Mean Square Fluctuation (RMSF) values were estimated through molecular dynamics simulation analysis. These results further revealed the high affinity of gemcitabine binding to the RRM1 protein.


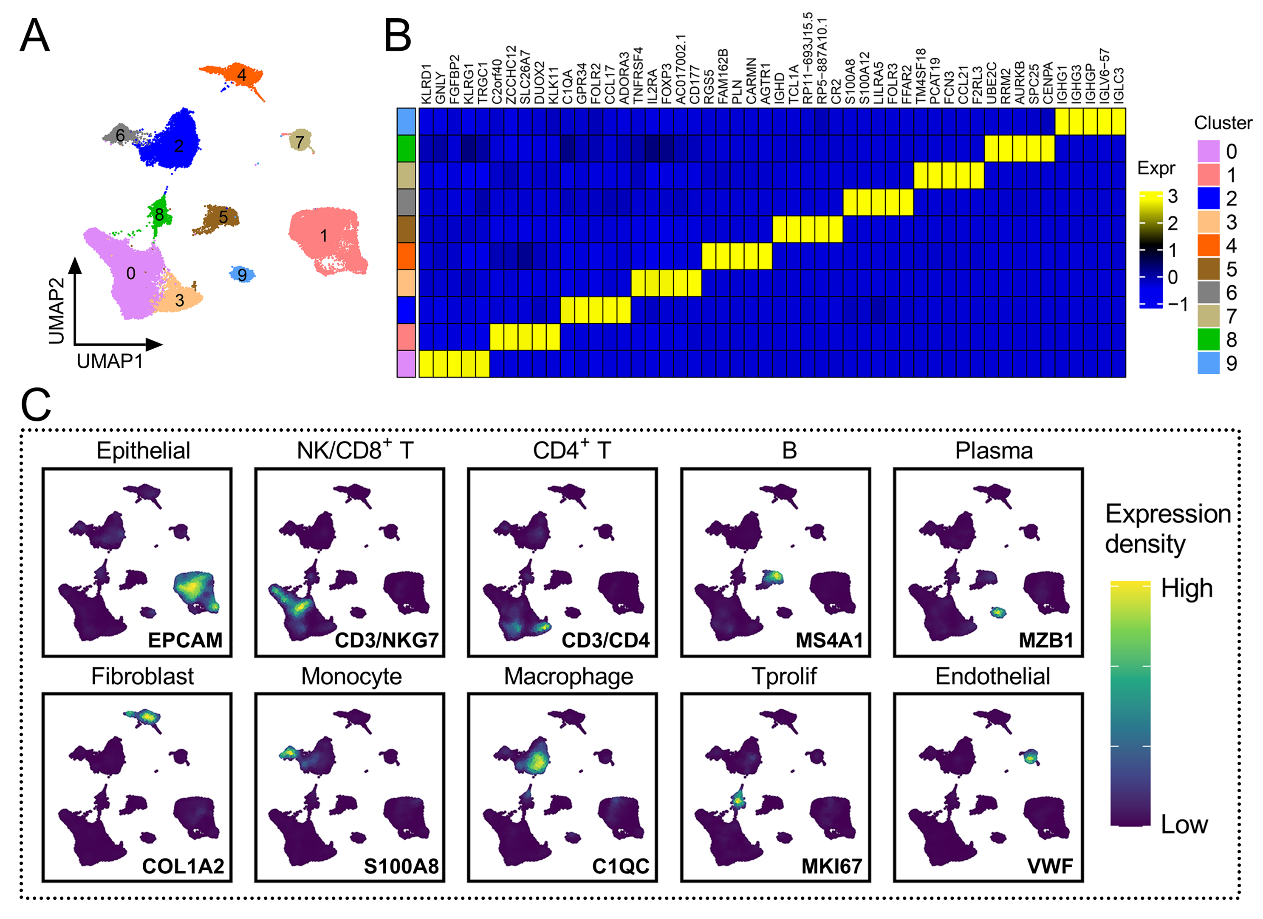


**Supplementary Figure S5:** (A) Ten major cell populations were identified in the PTC-TME using UMAP reduction, and the expression landscape of the marker genes for each cell type (Epithelial cell, NK/CD8+ T, CD4+ T, B, Plasma, Fibroblast, Monocyte, Macrophage, Tprolif, and endothelial cell) was shown in (B) an expression heatmap and (C) expression density plot.


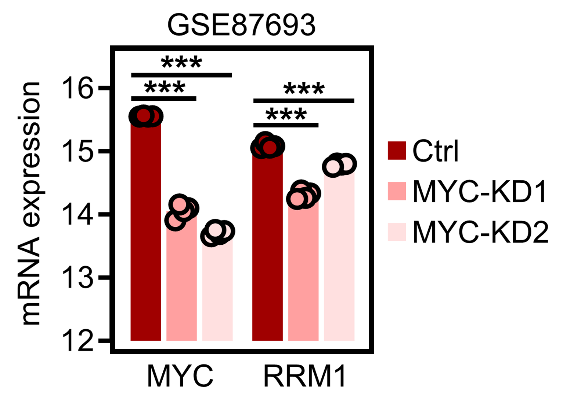


**Supplementary Figure S6:** The RRM1 mRNA is significantly downregulated in HCT116 cells treated with two siRNAs targeting MYC. Data from GSE87693 dataset (n.ctrl = 4, n.siRNA1 = 4, n.siRNA2 = 4; all p-values < 0.001).


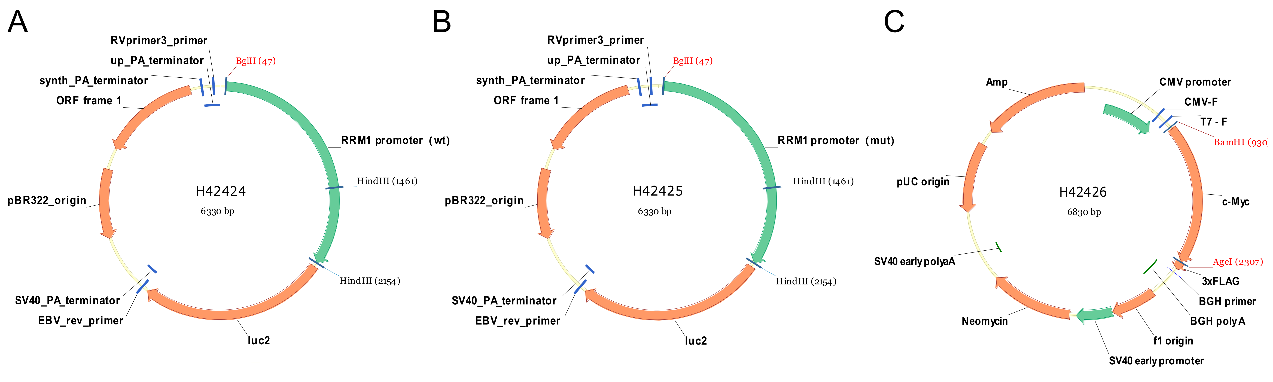


**Supplementary Figure S7:** Three plasmids for (A) RRM1 promoter (wt), (B) RRM1 promoter (mut), and (C) c-MYC were designed and illustrated.
